# Supplementary material for: Effect of Sample Transportation on the Proteome of Human Circulating Blood Extracellular Vesicles
Source: Int J Mol Sci. 2022 Apr 19;23(9):4515. doi: 10.3390/ijms23094515 (PMC9099550; doi:10.3390/ijms23094515)
Supplement: Supplementary file 1 [file ijms-23-04515-s001.zip › ijms-1602167_supplMaterial_rev_edited.pdf]

Supplementary Materials

**Effect of Sample Transportation on the Proteome of Human Circulating Blood Extracellular Vesicles**

Uldry Anne-Christine<sup>1,2</sup>, Maciel-Domiguez Anabel<sup>1,2</sup>, Jornod Maiwenn<sup>1,2</sup>, Buchs Natasha<sup>1,2</sup>, Braga-Lagache Sophie<sup>1,2</sup>, Justine Brodard<sup>3</sup>, Jovana Jankovic<sup>3</sup>, Bonadies Nicolas<sup>2,3</sup>, Heller Manfred<sup>1,2\*</sup>

<sup>1</sup> Proteomics and Mass Spectrometry Core Facility, Department for BioMedical Research (DBMR), University of Bern, Switzerland

<sup>2</sup> Department for BioMedical Research, University of Bern, Switzerland

<sup>3</sup> Department of Hematology and Central Hematology Laboratory, Inselspital, Bern University Hospital, University of Bern, Switzerland

**\* Corresponding Author:**

Manfred Heller (PhD)

Department for BioMedical Research

Murtenstrasse 24

3008 Bern, Switzerland.

Phone: +41 31 684 04 82

Email: [manfred.heller@dbmr.unibe.ch](mailto:manfred.heller@dbmr.unibe.ch)

## Supplementary Materials

### Supplementary Methods

#### *Measurement of forces*

The forces impacting on the samples during their transport from the venipuncture site to the wet lab were measured and recorded by a mini-computer *Raspberry Pi Zero*, equipped with a *SenseHat* (RPI0-SH) add-on board. The inertial measurement unit (IMU) on the RPI0-SH included an accelerometer, a gyroscope and a magnetometer. Calibration was performed at the receiving lab location. Calibration data is used by the *RTQF fusion algorithm* of the *RTIMULib* open-source library in order to report the orientation of the device with respect to a fixed Earth-bound reference frame. The orientation information is needed in order to determine the Earth gravitation vector in the device reference frame, and thereby reconstruct the accelerations within this reference frame. The IMU reports 3D accelerometer data and orientation in Euler angles at a sampling rate of 24 Hz. The size of the *RPI0-SH* is such that it fits exactly in the PTS tube; further packing arrangement largely prevented independent movements of S-Monovettes. For C transport the *RPI0-SH* was securely placed in the same rack as the S-Monovettes. One can therefore reasonably assume that the measured accelerations are representative of the forces acting on the S-Monovettes. The carrier placed the rack in a bag without further support, and the bag was held in one hand during the walk. It was intended that the carrier follows an identical route for all twelve transports; works along the set path forced however the carrier to take a small detour on two occasions. Both routes included an outdoor stretch, climbing one flight of stairs and the use of an elevator.

#### *Calculation of transport metrics*

Three transport metrics that encapsulate the history of shocks and vibrations impacting on a sample during a transport were calculated from the acceleration signal:

1. Teaker-Kaiser operator (TK), defined for discrete acceleration  $a$  at any time point  $t$ :

$$TK[a_{(t)}] = a_{(t)}^2 - a_{(t-1)} \times a_{(t+1)}$$

TK represents a measure for the energy of the acceleration signals. The values reported are the mean across the whole transport event.

2. Root Mean Square (RMS) acceleration over the event time interval  $\Delta T$  is given by:

$$RMS = \sqrt{\left(\frac{1}{\Delta T}\right) \int_0^{\Delta T} a_{(t)}^2 dt}$$

RMS is interpreted as a measure of the total amount of acceleration undergone by the samples.

3. Vibration Dose Value (VDV):

$$VDV = \left( \int_0^{\Delta T} a_{(t)}^4 dt \right)^{\frac{1}{4}}$$

VDV is a measure of the vibration dose and is often used in the context of studying the impact of vibrations on biological tissues.

For each C transport a section of the signal showing regular oscillations over a period ranging from 42 to 172 s was isolated and Fourier transformed (fast Fourier transformation applying a Hanning window).

#### *cEV isolation protocol comparison*

Blood from one of the donors of this study was drawn in the laboratory (no transportation involved) to prepare PFP aliquots of 400  $\mu\text{L}$  as described in the main manuscript. cEV were either isolated with the centrifugation protocol (CEN) as described in the main manuscript or by size exclusion chromatography (SEC) as described in the following three protocols:

- *SEC\_SN protocol*: PFP aliquots were centrifuged for 10 min at 2'000 g and 20°C as recommended by the SEC manufacturer (qEV, iZON Science, New Zealand). The supernatant (SN) was carefully removed by leaving approximately 50  $\mu\text{L}$  in the tube and loaded on the SEC column.
- *SEC\_P protocol*: PFP aliquots were centrifuged for 40 min at 16'000 g and 20°C. The supernatant was carefully removed leaving approximately 50  $\mu\text{L}$  liquid in the tube to which 200  $\mu\text{L}$  PBS were added by vigorous shaking. This EV suspension was loaded on the SEC column.
- *SEC\_Pw protocol*: A cEV suspension was prepared as described above for the SEC\_P protocol. This suspension was centrifuged again for 20 min at 16'000 g and 20°C. A volume of 200  $\mu\text{L}$  from the supernatant was carefully removed and replaced by 200  $\mu\text{L}$  PBS and vigorous shaking followed by a third centrifugation and resuspension of 50  $\mu\text{L}$  pellet fraction in 200  $\mu\text{L}$  PBS. The final EV suspension was loaded on the SEC column.

SEC columns were stored at 4°C, equilibrated to room temperature before use for one hour, and rinsed with 10 mL PBS at a flow rate of 1 mL/min. The cEV suspensions were loaded on the top of the column, let diffuse into the column bed and cEV were eluted by passing 10 mL PBS at a flow rate of 1 mL/min through the column. Fractions of 0.5 mL were collected in 1.5 mL polypropylene tubes, each containing 50  $\mu\text{L}$  PBS and a PVDF membrane disk (0.2  $\mu\text{m}$ , ThermoScientific) of 5 mm diameter cut into four to six small pieces. The PVDF membrane pieces were activated beforehand by incubation for 5 min in 200  $\mu\text{L}$  methanol, followed by

0.05% SDS/5% methanol/0.05% DTT, and finally PBS. After collection of fractions, each tube was centrifuged for 1 hour at 3'000 g and 20°C. Proteins bound to PVDF pieces were on-membrane digested as described elsewhere [1], and eluted peptides analyzed by nLC-MS2 as described in the main manuscript. SEC columns were regenerated by passing subsequently 20 mL PBS, 10 mL 0.5 M sodium hydroxide, 30-50 mL PBS (bringing pH back to neutral), and 20 mL 20% ethanol for storage.

#### *Nanoparticle tracking analysis (NTA) of SEC fractions*

In order to estimate the cEV size distribution within the SEC fractions, fractions 5 to 9 produced with the same protocols as above, but without placing PVDF membranes in the collection tubes, were analyzed on a nanoparticle tracking instrument (Nanosight NS300, Malvern, Almelo, NL). Capture screen gain was set at 12-15 while the camera level was set at level 10-12. A standard measurement was performed with 5 captures of 60 sec each adjusting the flow rate such that 30-45 particles were captured per frame. Particle counts were averaged and graphically plotted in log2 scale with Matlab (version R2010a).

## **Supplementary Results**

#### *Non-consistent impact of transport method on individual cEV protein compositions: removal of outliers BE351 and BE140*

It has already been noted that BE351 is an outlier of the ZetaView distributions in PPP as shown in Fig. 2 of the main manuscript. Furthermore, the differential expression analysis in PFP of C versus PTS for this donor revealed an exceptional number of proteins (304 against 0-1 for other donors) as significantly increased in PTS compared to C. There are fifteen cell-type specific proteins amongst those 304 BE351 PTS proteins, with thirteen being platelet-associated. That a potential problem of platelet activation occurred in the PFP PTS sample of BE351 was corroborated by the consistently high log2fc of platelet-specific cell markers CD41 and CD62P (red bars in sFig. 3). The two lymphocyte/monocyte-specific proteins CD40 and CD102 were also higher in PTS, while

the opposite was found for erythrocyte-, macrophage and endothelial-specific proteins (CD233, CD14, and HSPG2). Intriguingly, hardly any change in intensity between PTS and C was detected with the BE351 PPP isolates prepared from the very same whole blood input material like PFP samples (blue bars in sFig. 3). A GO term enrichment analysis (not shown) revealed that collagen-containing extracellular matrix was enriched in the non-changed protein fraction, while terms like focal adhesion or cytoskeleton were enriched in PTS isolates of PFP BE351. We interpret these observations as damage to cEV during the preparation of PFP aliquots from the carrier transported blood of donor BE351.

As for BE140, there were 1132 proteins in the PFP C isolate, which exceeded by far the numbers quantified in PFP PTS or both PPP samples, with 869, 907 and 900, respectively. A GO term over-representation analysis (not shown) submitting the 271 on-off proteins seen in the PFP C isolate revealed that proteins lost in PTS were of cellular origin. Again, we have to assume that something happened during the preparation of the different plasma aliquots, confounding the measurement outcome.

#### *Comparison of cEV isolation methods*

Our centrifugation based cEV isolation protocol (CEN) outperformed any of the tested SEC protocols in terms of measured intensities (sFig. 4), repeatability (R.S.D. in sFig. 4), and quantified numbers (sFig. 5) of proteins with a cellular origin, including cell type specific proteins, considered to represent the recovery of cEV from blood plasma. The proteome analysis of cEV isolated with protocol SEC\_SN, as recommended by the manufacturer of the SEC columns, revealed that cellular proteins started to elute in fraction 5, reaching a maximum in intensity in fraction 6 and 7, then dropping back to an intensity level as measured in fraction 5 in fraction 8 and below in 9 (sFig. 4). Blood plasma proteins, including apolipoproteins, coagulation and complement factors as well as immunoglobulins eluted already in fraction 5 with slightly increasing intensities up to fraction 9, while other serum proteins, for instance albumin, eluted at maximum intensity in fraction 5, decreasing until fraction 8, and increasing again in fraction 9 (sFig. 4). When PFP was first centrifuged to sediment cEV, and the pre-concentrated/purified cEV were fractionated by SEC (protocol SEC\_P), the overall intensities of cellular proteins increased in fractions 6 to 9 compared with SEC\_SN together with a changed

elution profile showing a maximum intensity in fraction 7, then dropping back to a level as in fraction 5 only in fraction 9. The elution profile of all contaminating blood plasma proteins showed a steady increase from fraction 5 to 9. Repeating the cEV sedimentation with two more centrifugation steps, as done in the CEN protocol followed by SEC (SEC\_Pw), the blood plasma protein elution profile did not change compared to SEC\_P, albeit the overall intensities for apolipoprotein, coagulation and complement factors, and immunoglobulins were decreased compared with the other two SEC protocols, while other serum proteins were still present at similar levels with the exception of fraction 5. The cellular protein elution profile resembled the one of protocol SEC\_P, albeit reaching higher intensities in fractions 7 to 9. The sedimentation of cEV by centrifugation prior to SEC in protocols SEC\_P and SEC\_Pw was meant to remove blood plasma proteins, which was indeed achieved. The additional washing steps with protocol SEC\_Pw could however not increase the number of quantified cellular proteins, but decreased slightly the number of blood plasma contaminations, which might explain increased cellular protein intensities due to a decreased suppression by plasma proteins (sFig. 5). This suppression effect does likely explain the decreased cellular protein recovery seen with the SEC\_SN protocol (sFig. 4 and 5). The abundant cell type specific proteins CD233 (representing cEV of erythrocyte origin) and CD61 (platelet origin) had a very similar elution profile with all three SEC protocols, reaching a maximum in fractions 6 and 7 (sFig. 4). The recovery of the lower abundant markers CD14 (macrophage origin) and HSPG2 (endothelial cell origin) was clearly compromised by the SEC protocols in an inconsistent manner, as a complete loss of CD14 or HSPG2 in SEC\_P or SEC\_Pw protocols, respectively, occurred, while both could be detected with SEC\_SN. Considering all elution profiles, we concluded that SEC fractions 6 to 8 contained the purest cEV, for which reason we used the proteins quantified in these fractions to compare the cEV proteome with the CEN one (Venn diagrams in sFig. 5). We could quantify a total of 127 cellular proteins in the combined set of 9 SEC fractionations, which were not found in the three replicates using our CEN protocol. However, the latter produced 151 proteins, which were nowhere found with any SEC preparation. With the contaminating blood plasma protein this relation was converted to the opposite, with 27 proteins not found and only eight found exclusively with the CEN protocol.

Our results demonstrate clearly that SEC does not provide the means for an improved purification of cEV from blood plasma proteins or lipoproteins compared with our sequential centrifugation protocol. In fact, when using the SEC columns as

recommended by the manufacturer, a significant reduction of cEV purification specificity is encountered compared to our isolation protocol, as the ratio of cellular proteins to blood plasma proteins is decreased (relative protein number column graph of sFig. 5). In addition, immunoglobulins represent an important source of contamination in the SEC fractions of protocols SEC\_SN and SEC\_P. NTA of the cEV-enriched SEC fractions collected with protocol SEC\_SN revealed a similar mean particle size between 90-123 nm and a similar size distribution between the first and 99<sup>th</sup> percentile of particle counts in all four fractions five to eight (sFig. 6). The peak maxima were shifted by about 10 nm to higher values with the SEC\_P protocol and the size distribution increased especially in fraction 5 and 6, which would indicate an isolation of larger EV in those early fractions, as is the expected outcome from SEC. Washing cEV further with additional centrifugations (protocol SEC\_Pw), resulted in increasing particle size peak maxima from fraction 5 to 8, shifting from 90 to 160 nm, and again a larger size distribution in fractions 5 to 7 compared with SEC\_SN. This result is unexpected, as the particle size in later SEC fractions should become smaller, not bigger. We can only speculate that the removal of contaminating blood plasma proteins by prior washing steps in protocol SEC\_Pw does induce a vesicle clotting effect, which is more pronounced with smaller cEV eluting in later fractions where the overall number of cEV is bigger based on the intensities of cellular proteins as illustrated in sFig. 4. This is corroborated when comparing the effect on the size distribution between protocols SEC\_SN and SEC\_P, and with the results on NTA measurements made directly in PFP and PPP as shown in the main manuscript.

## Supplementary Tables

**Table S1.** Clinical characteristics of study participants.

| Donor | Diagnosis*                                                  | Age /<br>gender | Ec<br>(10 <sup>12</sup> /L) | Tc<br>(10 <sup>9</sup> /L) | Lc<br>(10 <sup>9</sup> /L) | Gc<br>(10 <sup>9</sup> /L) | Mc<br>(10 <sup>9</sup> /L) | Ly<br>(10 <sup>9</sup> /L<br>) | HGB<br>(g/L) | CRP<br>(mg/L) | Tranfusion<br>dependency |
|-------|-------------------------------------------------------------|-----------------|-----------------------------|----------------------------|----------------------------|----------------------------|----------------------------|--------------------------------|--------------|---------------|--------------------------|
| BE349 | Healthy                                                     | 47 / m          | 5.63                        | 230                        | 5.29                       | 2.93                       | 0.51                       | 1.85                           | 169          | -             | -                        |
| BE351 | Healthy                                                     | 56 / m          | 5.07                        | 165                        | 3.74                       | 2.63                       | 0.32                       | 0.79                           | 151          | -             | -                        |
| BE352 | Healthy                                                     | 46 / f          | 5.20                        | 278                        | 6.94                       | 4.77                       | 0.41                       | 1.76                           | 144          | -             | -                        |
| BE353 | Healthy                                                     | 39 / m          | 5.51                        | 177                        | 7.24                       | 4.22                       | 0.68                       | 2.34                           | 161          | -             | -                        |
| BE354 | Healthy                                                     | 42 / f          | 4.66                        | 269                        | 11.15                      | 6.30                       | 1.11                       | 3.74                           | 140          | -             | -                        |
| BE355 | Inactive spondyloarthritis                                  | 45 / f          | 4.00                        | 200                        | 11.51                      | 7.44                       | 1.10                       | 2.97                           | 128          | -             | -                        |
| BE019 | MDS, hypoplastic                                            | 31 / m          | 2.48                        | 105                        | 2.03                       | 2.24                       | 0.02                       | 0.77                           | 83           | 5             | -                        |
| BE009 | MDS, lower risk                                             | 79 / m          | 3.53                        | 168                        | 1.72                       | 1.93                       | 0.40                       | 0.95                           | 124          | <3            | -                        |
| BE322 | MDS, lower risk                                             | 32 / m          | 3.39                        | 276                        | 4.7                        | 3.86                       | 0.07                       | 0.77                           | 125          | 28            | -                        |
| BE025 | Aggressive systemic<br>mastocytosis with MDS,<br>lower risk | 81 / m          | 2.31                        | 125                        | 1.31                       | 1.73                       | 0.09                       | 0.29                           | 66           | 18            | high                     |
| BE140 | MDS, higher risk                                            | 82 / f          | 3.49                        | 611                        | 7.12                       | 8.24                       | 0.34                       | 1.12                           | 88           | -             | low                      |
| BE363 | Secondary AML                                               | 53 / m          | 3.08                        | 149                        | 5.2                        | 4.58                       | 0.53                       | 0.89                           | 80           | 61            | low                      |

\*MDS: Myelodysplastic Syndromes; AML: Acute Myeloid Leukaemia.

**Table S2.** Qualitative summary of the g-forces experienced by S-Monovettes during transportation.

| Donor         | Transport duration [min] |             | Max [g]    |             | Mean [g]   |            | S.D. [g]   |            | Median [g] |            | Skewness   |            | # of shocks $\geq 2.5g$ |            |
|---------------|--------------------------|-------------|------------|-------------|------------|------------|------------|------------|------------|------------|------------|------------|-------------------------|------------|
|               | C                        | PTS         | C          | PTS         | C          | PTS        | C          | PTS        | C          | PTS        | C          | PTS        | C                       | PTS        |
| BE349         | 5.57                     | 2.15        | 0.7        | 21.1        | 0.2        | 0.9        | 0.1        | 1.3        | 0.1        | 0.4        | 1.0        | 4.4        | 0                       | 115        |
| BE351         | 5.29                     | 2.20        | 0.8        | 23.6        | 0.2        | 0.9        | 0.1        | 1.4        | 0.1        | 0.4        | 0.9        | 5.3        | 0                       | 116        |
| BE352         | 5.18                     | 2.66        | 0.8        | 22.5        | 0.2        | 0.7        | 0.2        | 1.3        | 0.2        | 0.2        | 0.8        | 5.4        | 0                       | 105        |
| BE353         | 5.14                     | 2.55        | 0.8        | 23.7        | 0.2        | 0.7        | 0.2        | 1.2        | 0.2        | 0.3        | 0.8        | 5.1        | 0                       | 118        |
| BE354         | 6.47                     | 2.69        | 0.7        | 22.3        | 0.2        | 0.7        | 0.1        | 1.2        | 0.1        | 0.3        | 0.9        | 5.1        | 0                       | 113        |
| BE355         | 5.54                     | 3.10        | 0.9        | 23.0        | 0.2        | 0.6        | 0.1        | 1.2        | 0.2        | 0.2        | 1.0        | 5.3        | 0                       | 114        |
| BE009         | 5.22                     | 2.17        | 0.9        | 23.9        | 0.2        | 1.0        | 0.2        | 1.5        | 0.2        | 0.5        | 0.7        | 5.8        | 0                       | 111        |
| BE019         | 5.21                     | 2.11        | 0.8        | 22.7        | 0.2        | 0.9        | 0.1        | 1.3        | 0.2        | 0.3        | 0.7        | 4.6        | 0                       | 112        |
| BE025         | 5.37                     | 2.32        | 0.9        | 19.7        | 0.2        | 0.8        | 0.2        | 1.3        | 0.2        | 0.3        | 0.9        | 4.4        | 0                       | 117        |
| BE140         | 5.82                     | 2.15        | 2.3        | 17.2        | 0.2        | 1.0        | 0.1        | 1.4        | 0.1        | 0.5        | 2.3        | 4.0        | 0                       | 123        |
| BE322         | 4.69                     | 2.20        | 1.3        | 22.3        | 0.2        | 0.9        | 0.2        | 1.4        | 0.2        | 0.4        | 0.7        | 4.4        | 0                       | 130        |
| BE363         | 6.44                     | 2.29        | 0.8        | 22.6        | 0.2        | 0.9        | 0.2        | 1.2        | 0.1        | 0.4        | 0.9        | 4.6        | 0                       | 115        |
| <b>Mean</b>   | <b>5.50</b>              | <b>2.38</b> | <b>1.0</b> | <b>22.1</b> | <b>0.2</b> | <b>0.8</b> | <b>0.2</b> | <b>1.3</b> | <b>0.2</b> | <b>0.4</b> | <b>1.0</b> | <b>4.9</b> | <b>0.00</b>             | <b>116</b> |
| <b>R.S.D.</b> | 9.6%                     | 12.8%       | 45.7%      | 8.7%        | 0.0%       | 15.6%      | 34.8%      | 7.6%       | 32.5%      | 28.6%      | 44.8%      | 11.1%      |                         | 5.4%       |

**Table S3.** Calculated transport metrics.

| Donor         | Mean of Teaker-Kaiser<br>operator<br>[g <sup>2</sup> ] |             | Root Mean Square<br>(RMS)<br>[g] |             | Vibration Dose Value<br>(VDV)<br>[ms <sup>-7/4</sup> ] |              |
|---------------|--------------------------------------------------------|-------------|----------------------------------|-------------|--------------------------------------------------------|--------------|
|               | C                                                      | PTS         | C                                | PTS         | C                                                      | PTS          |
| BE349         | 0.01                                                   | 0.87        | 0.21                             | 1.58        | 1.15                                                   | 12.09        |
| BE351         | 0.01                                                   | 1.12        | 0.20                             | 1.66        | 1.07                                                   | 13.78        |
| BE352         | 0.02                                                   | 0.83        | 0.29                             | 1.48        | 1.52                                                   | 13.42        |
| BE353         | 0.02                                                   | 0.72        | 0.27                             | 1.43        | 1.42                                                   | 12.50        |
| BE354         | 0.01                                                   | 0.72        | 0.20                             | 1.40        | 1.15                                                   | 12.37        |
| BE355         | 0.01                                                   | 0.68        | 0.21                             | 1.37        | 1.16                                                   | 12.97        |
| BE009         | 0.03                                                   | 1.32        | 0.27                             | 1.82        | 1.47                                                   | 15.36        |
| BE019         | 0.02                                                   | 0.95        | 0.25                             | 1.57        | 1.32                                                   | 12.34        |
| BE025         | 0.03                                                   | 0.82        | 0.28                             | 1.48        | 1.54                                                   | 11.66        |
| BE140         | 0.01                                                   | 0.92        | 0.19                             | 1.69        | 1.25                                                   | 12.09        |
| BE322         | 0.03                                                   | 1.02        | 0.30                             | 1.70        | 1.55                                                   | 12.97        |
| BE363         | 0.02                                                   | 0.85        | 0.24                             | 1.51        | 1.39                                                   | 12.09        |
| <b>Mean</b>   | <b>0.02</b>                                            | <b>0.90</b> | <b>0.24</b>                      | <b>1.56</b> | <b>1.33</b>                                            | <b>12.80</b> |
| <b>R.S.D.</b> | 45.5%                                                  | 20.3%       | 16.2%                            | 8.8%        | 13.0%                                                  | 7.9%         |

**Table S4.** Number of quantified cEV-associated protein groups per donor and plasma type, with the corresponding numbers of (persistently) significantly over-expressed protein groups between transport types or uniquely found in either of them.

| Donor         | PFP         |             |            |             |             | PPP         |             |          |             |            |
|---------------|-------------|-------------|------------|-------------|-------------|-------------|-------------|----------|-------------|------------|
|               | quantified  | significant |            | uniquely in |             | quantified  | significant |          | uniquely in |            |
|               | total       | C           | PTS        | C           | PTS         | total       | C           | PTS      | C           | PTS        |
| BE349         | 955         | 0           | 0          | 11          | 58          | 1755        | 0           | 0        | 53          | 30         |
| BE351         | 1184        | 1           | 304        | 7           | 584         | 1456        | 0           | 0        | 41          | 8          |
| BE352         | 1022        | 0           | 0          | 21          | 30          | 1651        | 0           | 0        | 113         | 10         |
| BE353         | 969         | 0           | 0          | 63          | 31          | 1472        | 0           | 0        | 13          | 75         |
| BE354         | 569         | 1           | 5          | 6           | 105         | 1615        | 0           | 0        | 7           | 129        |
| BE355         | 903         | 0           | 0          | 12          | 42          | 1614        | 0           | 0        | 11          | 281        |
| BE009         | 1342        | 0           | 0          | 26          | 28          | 1765        | 0           | 0        | 16          | 72         |
| BE019         | 852         | 0           | 0          | 14          | 54          | 1722        | 0           | 0        | 12          | 36         |
| BE025         | 918         | 0           | 0          | 164         | 9           | 1598        | 0           | 0        | 18          | 84         |
| BE140         | 1140        | 0           | 0          | 271         | 8           | 931         | 0           | 0        | 31          | 24         |
| BE322         | 1360        | 0           | 0          | 21          | 157         | 1545        | 0           | 0        | 24          | 16         |
| BE363         | 841         | 1           | 0          | 148         | 8           | 1404        | 0           | 0        | 22          | 98         |
| <b>Median</b> | <b>962</b>  | <b>0</b>    | <b>0</b>   | <b>21</b>   | <b>36.5</b> | <b>1606</b> | <b>0</b>    | <b>0</b> | <b>20</b>   | <b>54</b>  |
| <b>Min</b>    | <b>569</b>  | <b>0</b>    | <b>0</b>   | <b>6</b>    | <b>8</b>    | <b>931</b>  | <b>0</b>    | <b>0</b> | <b>7</b>    | <b>8</b>   |
| <b>Max</b>    | <b>1360</b> | <b>1</b>    | <b>304</b> | <b>271</b>  | <b>584</b>  | <b>1765</b> | <b>0</b>    | <b>0</b> | <b>113</b>  | <b>281</b> |

**Table S5.** Matrix of quantified features used for Spearman rank correlations used for Fig. 4 in main text.

|                                                                           | PFP                      | C       |         |         |         |         |         |         |         |         |         |         |         | PTS     |         |         |         |         |         |         |         |         |         |         |         |
|---------------------------------------------------------------------------|--------------------------|---------|---------|---------|---------|---------|---------|---------|---------|---------|---------|---------|---------|---------|---------|---------|---------|---------|---------|---------|---------|---------|---------|---------|---------|
|                                                                           | Quantified feature       | BE349   | BE351   | BE352   | BE353   | BE354   | BE355   | BE009   | BE019   | BE025   | BE140   | BE322   | BE363   | BE349   | BE351   | BE352   | BE353   | BE354   | BE355   | BE009   | BE019   | BE025   | BE140   | BE322   | BE363   |
| ZetaView®                                                                 | Particle conc.           | 5.5E+07 | 1.1E+08 | 4.0E+07 | 6.3E+07 | 1.1E+08 | 7.1E+07 | 6.5E+07 | 4.6E+07 | 2.9E+07 | 7.1E+07 | 4.7E+07 | 8.2E+07 | 7.4E+07 | 1.4E+08 | 8.2E+07 | 1.1E+08 | 1.3E+08 | 7.2E+07 | 8.8E+07 | 8.5E+07 | 5.9E+07 | 7.4E+07 | 1.0E+08 | 8.2E+07 |
|                                                                           | Original particle conc.  | 2.0E+12 | 2.3E+12 | 6.3E+11 | 1.0E+12 | 2.2E+12 | 1.1E+12 | 1.1E+12 | 7.6E+11 | 4.4E+11 | 1.4E+12 | 8.1E+11 | 1.3E+12 | 1.3E+12 | 2.4E+12 | 1.5E+12 | 2.0E+12 | 2.2E+12 | 1.3E+12 | 1.6E+12 | 1.5E+12 | 1.1E+12 | 1.3E+12 | 1.8E+12 | 1.5E+12 |
|                                                                           | Particle vol.            | 3.7E+19 | 3.2E+19 | 8.9E+18 | 1.5E+19 | 3.1E+19 | 1.4E+19 | 2.0E+19 | 1.3E+19 | 1.5E+19 | 2.0E+19 | 1.9E+19 | 2.4E+19 | 5.2E+19 | 7.5E+19 | 1.0E+20 | 1.3E+20 | 9.6E+19 | 6.3E+19 | 1.0E+20 | 1.3E+20 | 8.6E+19 | 6.6E+19 | 7.2E+19 | 8.4E+19 |
|                                                                           | Ec (10 <sup>12</sup> /L) | 5.63    | 5.07    | 5.2     | 5.51    | 4.66    | 4       | 3.53    | 2.48    | 2.31    | 3.49    | 3.39    | 3.08    | 5.63    | 5.07    | 5.2     | 5.51    | 4.66    | 4       | 3.53    | 2.48    | 2.31    | 3.49    | 3.39    | 3.08    |
| Blood cell count                                                          | Tc (10 <sup>9</sup> /L)  | 230     | 165     | 278     | 177     | 269     | 200     | 168     | 105     | 125     | 611     | 276     | 149     | 230     | 165     | 278     | 177     | 269     | 200     | 168     | 105     | 125     | 611     | 276     | 149     |
|                                                                           | Lc (10 <sup>9</sup> /L)  | 5.29    | 3.74    | 6.94    | 7.24    | 11.15   | 11.51   | 1.72    | 2.03    | 1.31    | 7.12    | 4.7     | 5.2     | 5.29    | 3.74    | 6.94    | 7.24    | 11.15   | 11.51   | 1.72    | 2.03    | 1.31    | 7.12    | 4.7     | 5.2     |
|                                                                           | Gc (10 <sup>9</sup> /L)  | 2.93    | 2.63    | 4.77    | 4.22    | 6.3     | 7.44    | 1.93    | 2.24    | 1.73    | 8.24    | 3.86    | 4.58    | 2.93    | 2.63    | 4.77    | 4.22    | 6.3     | 7.44    | 1.93    | 2.24    | 1.73    | 8.24    | 3.86    | 4.58    |
|                                                                           | Mc (10 <sup>9</sup> /L)  | 0.51    | 0.32    | 0.41    | 0.68    | 1.11    | 1.1     | 0.4     | 0.02    | 0.09    | 0.34    | 0.07    | 0.53    | 0.51    | 0.32    | 0.41    | 0.68    | 1.11    | 1.1     | 0.4     | 0.02    | 0.09    | 0.34    | 0.07    | 0.53    |
|                                                                           | Ly (10 <sup>9</sup> /L)  | 1.85    | 0.79    | 1.76    | 2.34    | 3.74    | 2.97    | 0.95    | 0.77    | 0.29    | 1.12    | 0.77    | 0.89    | 1.85    | 0.79    | 1.76    | 2.34    | 3.74    | 2.97    | 0.95    | 0.77    | 0.29    | 1.12    | 0.77    | 0.89    |
|                                                                           | HGB (g/L)                | 169     | 151     | 144     | 161     | 140     | 128     | 124     | 83      | 66      | 88      | 125     | 80      | 169     | 151     | 144     | 161     | 140     | 128     | 124     | 83      | 66      | 88      | 125     | 80      |
|                                                                           | TK                       | 0.01    | 0.01    | 0.02    | 0.02    | 0.01    | 0.01    | 0.03    | 0.02    | 0.03    | 0.01    | 0.03    | 0.02    | 0.87    | 1.12    | 0.83    | 0.72    | 0.72    | 0.68    | 1.32    | 0.95    | 0.82    | 0.92    | 1.02    | 0.85    |
|                                                                           | RMS                      | 0.21    | 0.20    | 0.29    | 0.27    | 0.20    | 0.21    | 0.27    | 0.25    | 0.28    | 0.19    | 0.30    | 0.24    | 1.58    | 1.66    | 1.48    | 1.43    | 1.40    | 1.37    | 1.82    | 1.57    | 1.48    | 1.69    | 1.70    | 1.51    |
| Force                                                                     | VDV                      | 1.15    | 1.07    | 1.52    | 1.42    | 1.15    | 1.16    | 1.47    | 1.32    | 1.54    | 1.25    | 1.55    | 1.39    | 12.09   | 13.78   | 13.42   | 12.50   | 12.37   | 12.97   | 15.36   | 12.34   | 11.66   | 12.09   | 12.97   | 12.09   |
| Summed log2-transformed Top3 intensities for protein class or cell marker | cellmembrane             | 6629.1  | 3841.0  | 7916.0  | 7129.4  | 2870.2  | 6308.6  | 10467.0 | 5742.6  | 6772.4  | 8281.0  | 8753.5  | 6605.7  | 7081.1  | 9353.0  | 8060.6  | 6825.0  | 3793.9  | 6586.1  | 10567.8 | 6339.6  | 5136.1  | 5990.5  | 10221.0 | 4970.2  |
|                                                                           | cellpart                 | 8946.9  | 4693.7  | 9820.6  | 9159.0  | 3251.8  | 7959.1  | 14205.7 | 7562.3  | 9701.4  | 12272.6 | 13686.2 | 7827.6  | 9758.4  | 12543.3 | 10099.9 | 8553.3  | 4582.1  | 8597.3  | 14202.9 | 8168.7  | 7578.8  | 8587.9  | 15499.3 | 5884.0  |
|                                                                           | cellsurface              | 1677.0  | 1529.2  | 1714.1  | 1728.7  | 1352.9  | 1756.9  | 2083.0  | 1658.4  | 1743.7  | 1816.0  | 1847.9  | 1726.2  | 1787.4  | 1932.8  | 1761.6  | 1752.0  | 1511.6  | 1785.2  | 2105.4  | 1707.4  | 1618.3  | 1653.0  | 1951.8  | 1643.6  |
|                                                                           | keratin                  | 69.7    | 144.1   | 51.2    | 43.7    | 134.7   | 121.9   | 177.3   | 178.7   | 115.3   | 138.5   | 160.8   | 182.1   | 97.3    | 182.2   | 175.7   | 164.7   | 119.5   | 91.5    | 156.3   | 159.4   | 119.1   | 137.4   | 176.8   | 140.7   |
|                                                                           | coagulation factors      | 573.9   | 593.9   | 569.4   | 570.3   | 547.1   | 534.9   | 579.0   | 529.8   | 538.1   | 521.3   | 588.7   | 574.3   | 572.8   | 587.9   | 568.1   | 567.6   | 566.0   | 527.2   | 600.3   | 529.4   | 523.7   | 527.1   | 574.9   | 574.1   |
|                                                                           | apolipoprotein           | 525.9   | 549.3   | 514.7   | 527.2   | 583.0   | 508.3   | 507.4   | 510.1   | 456.5   | 546.3   | 533.1   | 486.2   | 554.1   | 529.7   | 516.3   | 530.8   | 570.8   | 507.8   | 509.5   | 511.3   | 482.1   | 571.6   | 509.5   | 489.4   |
|                                                                           | complement factors       | 575.6   | 608.0   | 571.0   | 551.0   | 570.1   | 604.8   | 579.7   | 572.8   | 577.7   | 551.4   | 561.9   | 653.9   | 578.8   | 578.3   | 545.8   | 555.0   | 562.0   | 597.8   | 578.9   | 566.9   | 584.5   | 560.5   | 535.1   | 666.4   |
|                                                                           | immunoglobulins          | 993.9   | 1216.6  | 1051.0  | 1520.0  | 988.0   | 1691.8  | 1147.2  | 1241.5  | 936.9   | 1332.8  | 928.0   | 1158.5  | 965.0   | 1163.3  | 1039.7  | 1598.7  | 963.5   | 1602.4  | 1074.4  | 1277.5  | 903.3   | 1254.8  | 901.4   | 1121.0  |
|                                                                           | other plasma proteins    | 1198.7  | 1241.3  | 1190.0  | 1167.6  | 1239.6  | 1158.6  | 1167.8  | 1197.8  | 1153.9  | 1083.7  | 1257.7  | 1236.9  | 1230.5  | 1258.2  | 1211.9  | 1204.7  | 1247.2  | 1167.4  | 1208.7  | 1204.9  | 1195.5  | 1098.5  | 1252.1  | 1256.6  |
|                                                                           | Exosome                  | 12154.2 | 9103.5  | 12630.7 | 12740.2 | 7837.1  | 11447.3 | 15798.7 | 10978.4 | 12307.5 | 14043.5 | 15248.1 | 11812.1 | 12870.8 | 14862.8 | 12979.3 | 12260.9 | 8887.9  | 11902.0 | 15726.8 | 11504.9 | 10636.5 | 11599.1 | 16248.3 | 10439.4 |
|                                                                           | Blood microparticle      | 2814.8  | 2833.7  | 2701.1  | 2909.8  | 2754.9  | 2900.5  | 2770.8  | 2826.1  | 2725.6  | 2792.2  | 2803.1  | 2814.1  | 2783.5  | 2805.3  | 2710.2  | 2960.1  | 2758.7  | 2883.1  | 2811.5  | 2856.7  | 2703.7  | 2780.2  | 2751.7  | 2833.5  |
|                                                                           | Endothelial cell         | 614.8   | 534.9   | 647.3   | 673.0   | 417.3   | 583.0   | 733.7   | 523.6   | 546.1   | 559.9   | 655.5   | 650.7   | 626.4   | 750.6   | 692.3   | 663.4   | 484.8   | 586.2   | 741.2   | 520.3   | 440.1   | 484.8   | 692.3   | 563.3   |
|                                                                           | Stem/Progenitor          | 524.7   | 472.9   | 556.8   | 605.7   | 356.8   | 486.6   | 617.0   | 479.1   | 409.6   | 461.8   | 561.3   | 596.8   | 540.7   | 639.5   | 604.6   | 599.9   | 396.1   | 516.8   | 627.5   | 474.8   | 331.4   | 392.1   | 594.0   | 495.1   |
|                                                                           | T Cell                   | 588.8   | 544.0   | 654.4   | 703.7   | 461.5   | 618.1   | 675.0   | 527.8   | 487.8   | 572.2   | 620.5   | 725.9   | 600.5   | 721.5   | 679.7   | 722.5   | 474.6   | 616.9   | 684.0   | 550.8   | 406.3   | 512.2   | 652.5   | 642.7   |
|                                                                           | B Cell                   | 517.7   | 472.6   | 584.6   | 607.3   | 412.1   | 546.4   | 602.6   | 461.0   | 420.3   | 522.9   | 550.9   | 607.0   | 527.1   | 644.8   | 609.6   | 628.7   | 446.5   | 545.4   | 612.1   | 455.8   | 381.0   | 467.2   | 582.2   | 528.0   |
|                                                                           | NK cell                  | 444.9   | 366.0   | 470.3   | 534.7   | 346.5   | 452.3   | 504.7   | 367.4   | 338.5   | 403.8   | 452.2   | 559.1   | 454.2   | 507.6   | 491.9   | 534.3   | 356.6   | 451.8   | 510.7   | 380.5   | 284.5   | 392.2   | 485.3   | 502.0   |
|                                                                           | Lymphocytes              | 632.7   | 564.6   | 699.4   | 746.7   | 461.5   | 640.9   | 723.4   | 573.5   | 538.0   | 619.6   | 668.7   | 769.4   | 644.7   | 768.1   | 726.5   | 765.8   | 497.1   | 640.7   | 733.5   | 575.9   | 451.7   | 536.8   | 702.0   | 666.9   |
|                                                                           | Dendritic cell           | 230.0   | 181.2   | 272.7   | 278.0   | 166.3   | 235.6   | 284.3   | 204.4   | 151.0   | 228.9   | 238.6   | 325.6   | 237.4   | 289.7   | 295.3   | 255.9   | 167.7   | 234.8   | 286.4   | 187.2   | 142.1   | 159.9   | 264.1   | 281.6   |

|  | PFP                | C     |       |       |       |       |       |       |       |       |       |       |       | PTS   |       |       |       |       |       |       |       |       |       |       |       |
|--|--------------------|-------|-------|-------|-------|-------|-------|-------|-------|-------|-------|-------|-------|-------|-------|-------|-------|-------|-------|-------|-------|-------|-------|-------|-------|
|  | Quantified feature | BE349 | BE351 | BE352 | BE353 | BE354 | BE355 | BE009 | BE019 | BE025 | BE140 | BE322 | BE363 | BE349 | BE351 | BE352 | BE353 | BE354 | BE355 | BE009 | BE019 | BE025 | BE140 | BE322 | BE363 |
|  | Monoc./Macro ph.   | 695.9 | 628.2 | 784.0 | 832.1 | 543.5 | 706.5 | 807.7 | 640.5 | 602.5 | 676.6 | 754.1 | 872.4 | 708.5 | 852.6 | 813.0 | 851.9 | 603.6 | 704.9 | 819.1 | 635.9 | 538.1 | 619.5 | 788.2 | 788.5 |
|  | Granulocyte        | 433.9 | 392.7 | 494.5 | 586.8 | 354.3 | 500.9 | 487.9 | 441.4 | 372.1 | 437.5 | 462.7 | 615.6 | 440.8 | 511.1 | 502.2 | 591.1 | 383.2 | 504.3 | 493.6 | 458.4 | 338.0 | 406.3 | 491.5 | 625.4 |
|  | Leukocyte          | 739.4 | 669.4 | 828.8 | 874.9 | 543.5 | 770.6 | 853.6 | 680.5 | 649.0 | 722.6 | 798.2 | 916.9 | 753.3 | 900.4 | 857.4 | 895.9 | 603.6 | 770.2 | 865.8 | 680.8 | 560.8 | 639.6 | 833.7 | 832.2 |
|  | Platelet           | 715.2 | 608.8 | 757.6 | 749.5 | 455.9 | 707.8 | 815.8 | 657.3 | 658.1 | 700.8 | 755.3 | 729.7 | 732.7 | 795.5 | 766.1 | 720.8 | 573.5 | 714.0 | 824.5 | 686.5 | 606.8 | 616.4 | 779.9 | 613.3 |
|  | Erythrocyte        | 285.3 | 288.8 | 307.3 | 318.6 | 211.7 | 240.6 | 338.5 | 237.0 | 200.2 | 239.4 | 291.9 | 293.1 | 293.2 | 339.9 | 311.3 | 319.8 | 220.7 | 269.3 | 344.8 | 249.0 | 171.3 | 235.8 | 294.1 | 259.5 |

**Table S6.** Remaining non-zero protein coefficients with pure *lasso* ( $C_{\alpha=1}$ ), or the *elastic net* ( $C_{\alpha=0.5}$ ) approach. Proteins forming an interaction node in a string network as shown in Fig. 5-7 of the main manuscript are marked with a plus (+) sign.

| Gene Name         | SwissProt<br>Accession | $C_{\alpha=1}$ | $C_{\alpha=0.5}$ | Network<br>$C_{TK/PTS/VD}$<br>V | Network<br>PTS_TK/RMS | Network<br>PTS_VDV |
|-------------------|------------------------|----------------|------------------|---------------------------------|-----------------------|--------------------|
| OIT3              | Q8WWZ8                 | -1.8           |                  |                                 |                       |                    |
| C4BPB             | P20851-2               | -1.5           |                  |                                 |                       |                    |
| CORO1A            | P31146                 | -1.3           |                  | +                               |                       | +                  |
| ATP5PF<br>(ATP5J) | P18859-2               | -0.5           |                  | +                               | +                     | +                  |
| ST6GAL1           | P15907                 | -0.3           | -<br>0.004       |                                 |                       |                    |
| HSPA1A            | P0DMV8                 |                | -0.2             | +                               | +                     | +                  |
| EFEMP1            | Q12805-2               | -<br>0.05      |                  |                                 |                       |                    |
| CFHR1             | Q03591                 | 0.06           |                  |                                 |                       | +                  |
| KRT1              | P04264                 | 0.6            |                  |                                 |                       | +                  |
| FLOT1             | O75955                 | 2.0            |                  | +                               | +                     | +                  |
| HRG               | P04196                 | 2.0            |                  | +                               | +                     | +                  |
| SERPINC1          | P01008                 | 3.6            | 0.3              | +                               | +                     | +                  |

## Supplementary Figures

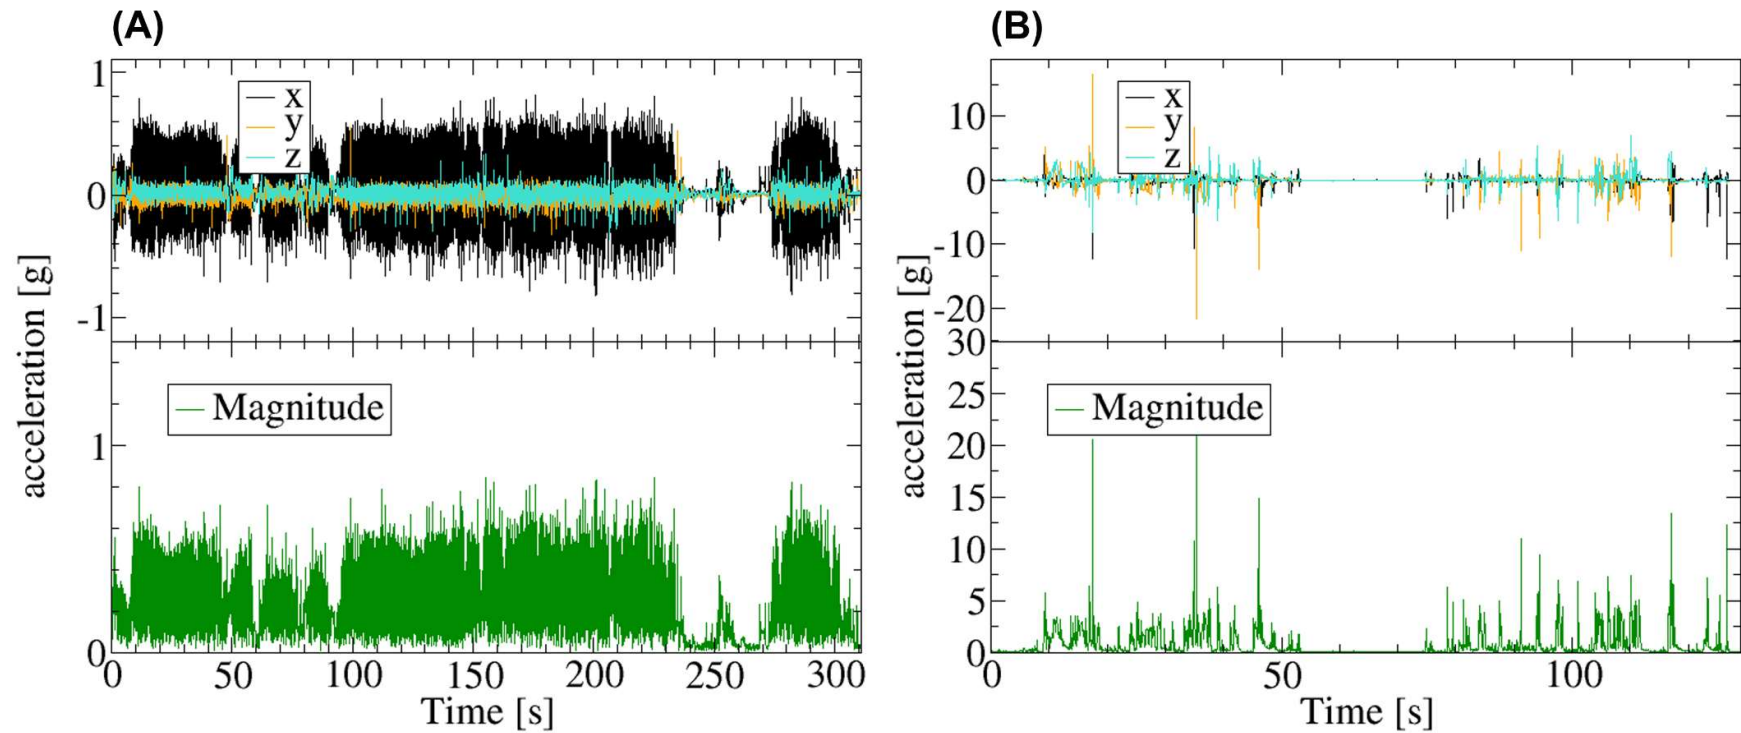

**Figure S1.** Accelerations measurement for one representative sample (BE352). The acceleration in the device reference frame is shown on the vertical axis in units of  $g$ , with the three components in the upper panels, and the magnitude in the lower panels. Panel (A) shows the C transport, panel (B) the PTS transport of this donor' samples. Note the substantially higher acceleration values exhibited in PTS. The C transport lasted for this sample 5.2 min, while the PTS transport was shorter with 2.7 min.

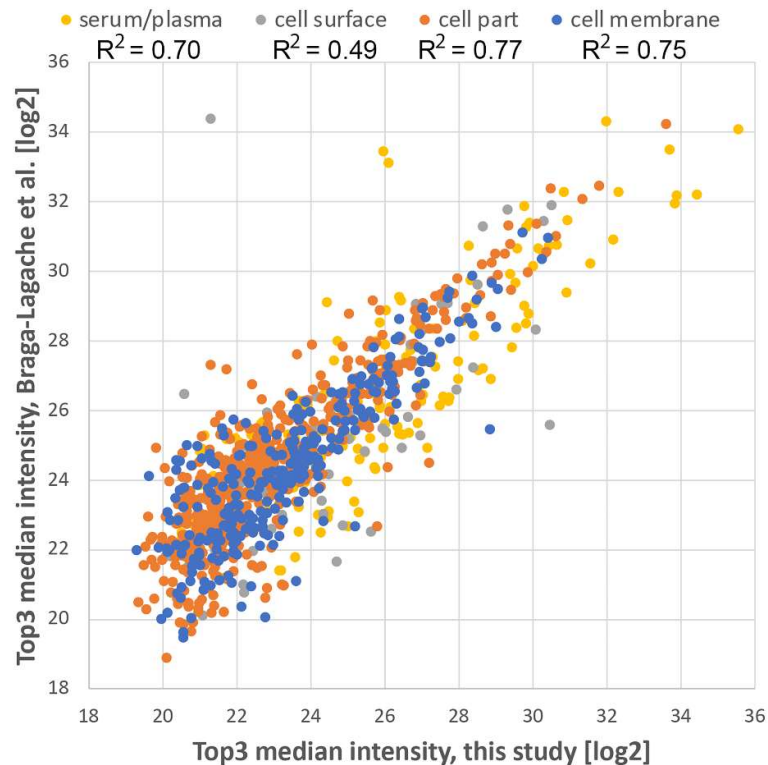

**Figure S2.** Protein intensity correlation per protein class. The median Top3 cEV protein intensities of proteins quantified in a former study by Braga-Lagache et al with the 400- $\mu$ L aliquots of twelve healthy donors [2] on the y-axis and this PFP dataset on the x-axis were compared. Only proteins that were quantified at least three times in each dataset ( $N = 1009$ ) were used. Each dot represents one protein and proteins were grouped by protein calls as indicated at the top of the scatterplot. Below each protein class the squared linear regression correlation is indicated. The raw mass spec data of Braga-Lagache et al was reprocessed through the exact same pipeline as the data in this study and is available on the pride ProteomeXchange server with identifier PXD003935. Please note that the data was acquired on two different mass spectrometers in the two studies, which might explain the shift to higher intensities in Braga-Lagache et al.

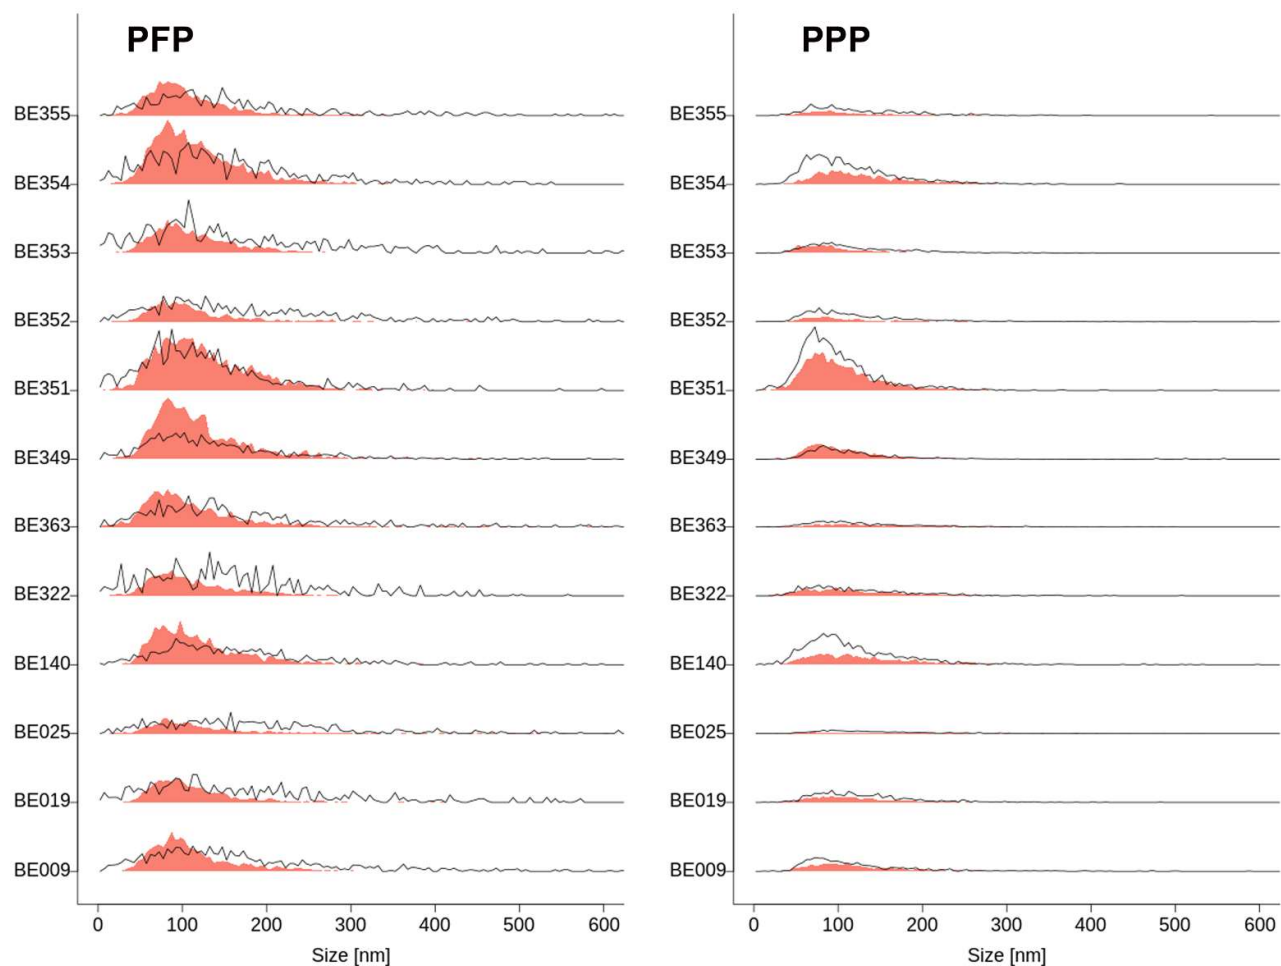

**Figure S3.** Nanoparticle size distribution in individual plasma samples. (A) Plot of the binned, averaged (over technical replicates) nanoparticle size distributions for PFP (left) and PPP (right). Particle size is in nm on the x-axis and counts on the y-axis (same scale everywhere). The red-filled curves illustrate data acquired from C samples, the black contours the ones from PTS, respectively.

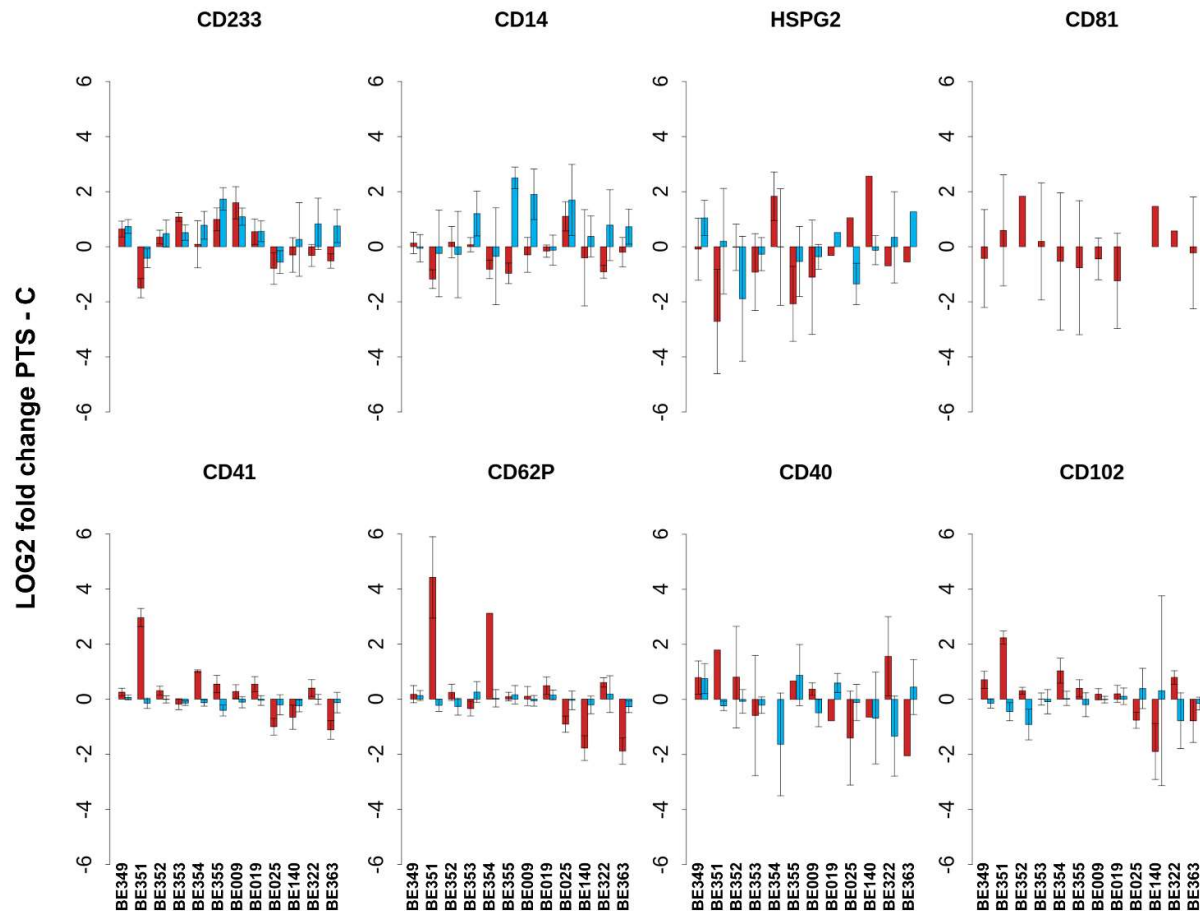

**Figure S4.** Relative change of cell-type specific protein intensities. The mean log2-fold change (y-axis, same scale on every plot) between PTS and C for cell-type specific protein intensities are shown as bar plots. The same marker proteins were used as in Fig. 3 of the main manuscript. Donors are indicated on the x-axis. The red bars represent the mean changes of the cEV isolates from PFP, the blue ones from PPP, and the whiskers extend one pooled standard deviation from the three replicates measured for each transport mode and donor. Protein intensities have been normalized separately in PFP and PPP.

### (A) Pure Lasso

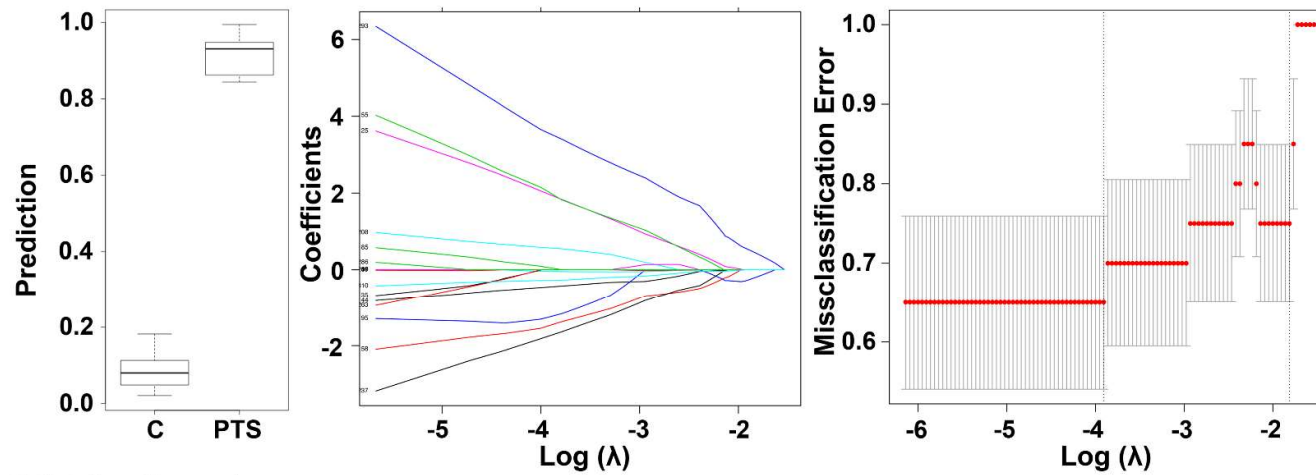

### (B) Elastic net

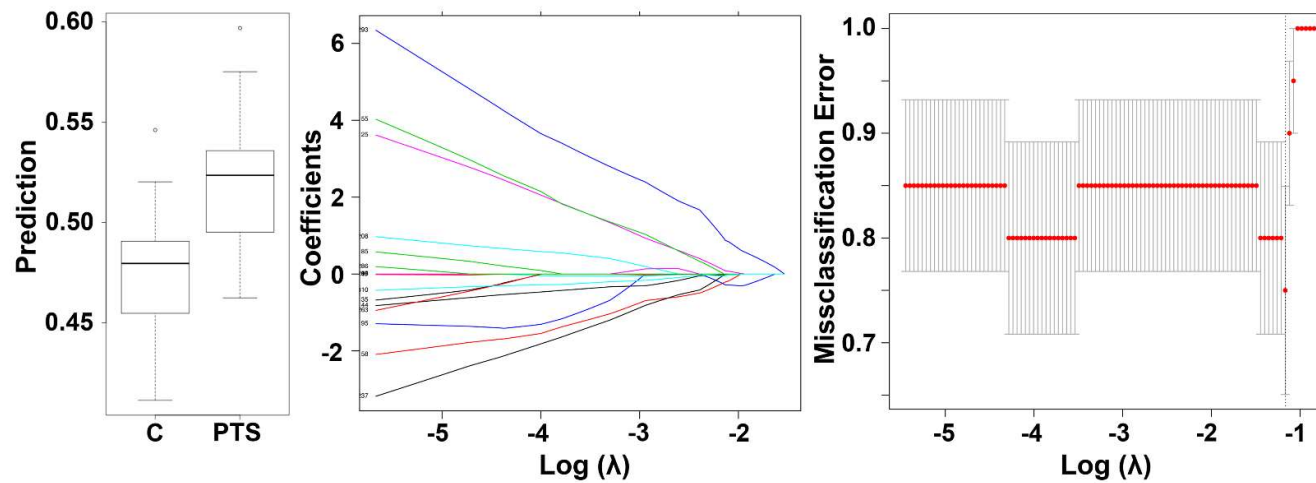

**Figure S5.** Lasso analysis. Predictor, coefficients per lambda and missclassification error for (a) pure lasso, and (b) elastic net.

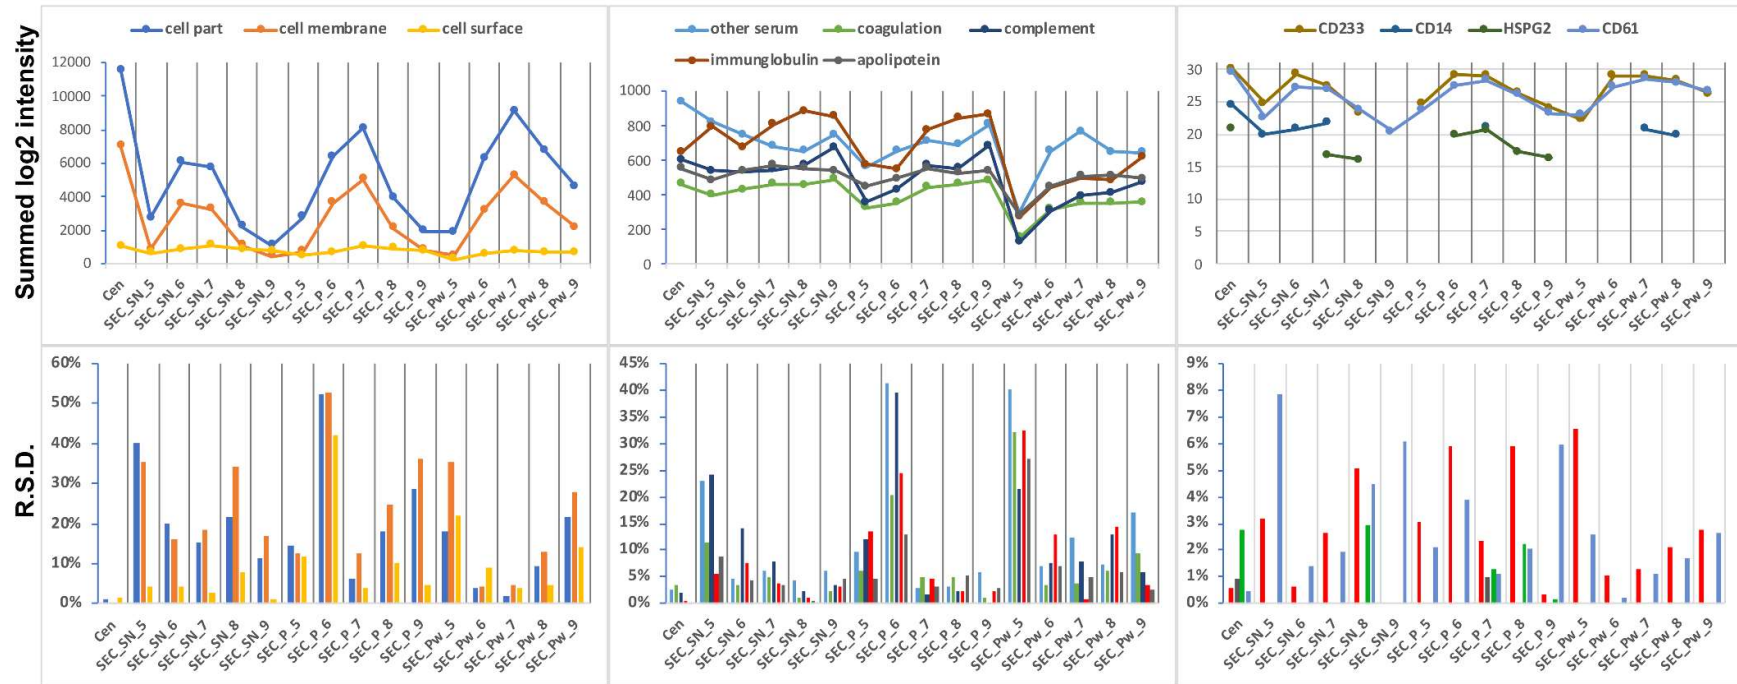

**Figure S6.** Protein category recoveries by cEV isolation method. The upper row of line graphs illustrates the log2-transformed *Top3* protein intensities summed according to protein category or cell type specific marker protein. Each point represents the mean of three independent replicate analyses performed with each isolation method. The column graphs underneath each line graph show the relative standard deviation to the corresponding data points in the line graphs. The left graphs are for cellular proteins, assumed to represent overall cEV abundance; the middle ones are for proteins of blood plasma representing contamination; and the right graphs are for cell type specific proteins representing erythrocyte (CD233), macrophage (CD14), endothelial cell (HSPG2) and platelet (CD61) origin, respectively. On the x-axes the abbreviations for the cEV isolation protocols are given as explained above in the method section, with the number at the end corresponding to the SEC fraction number.

**(A)**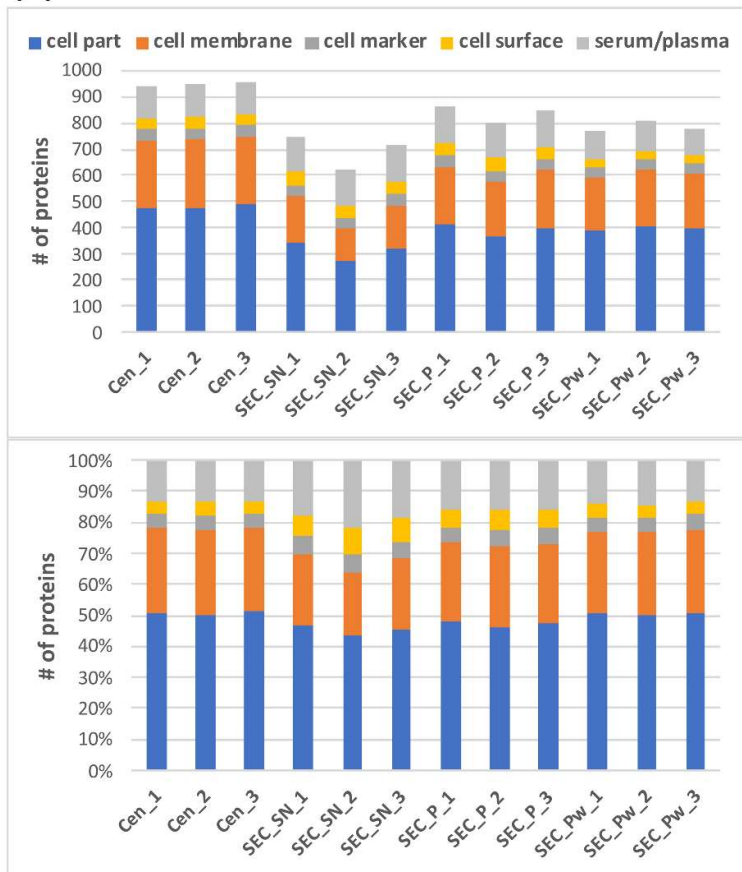**(B)**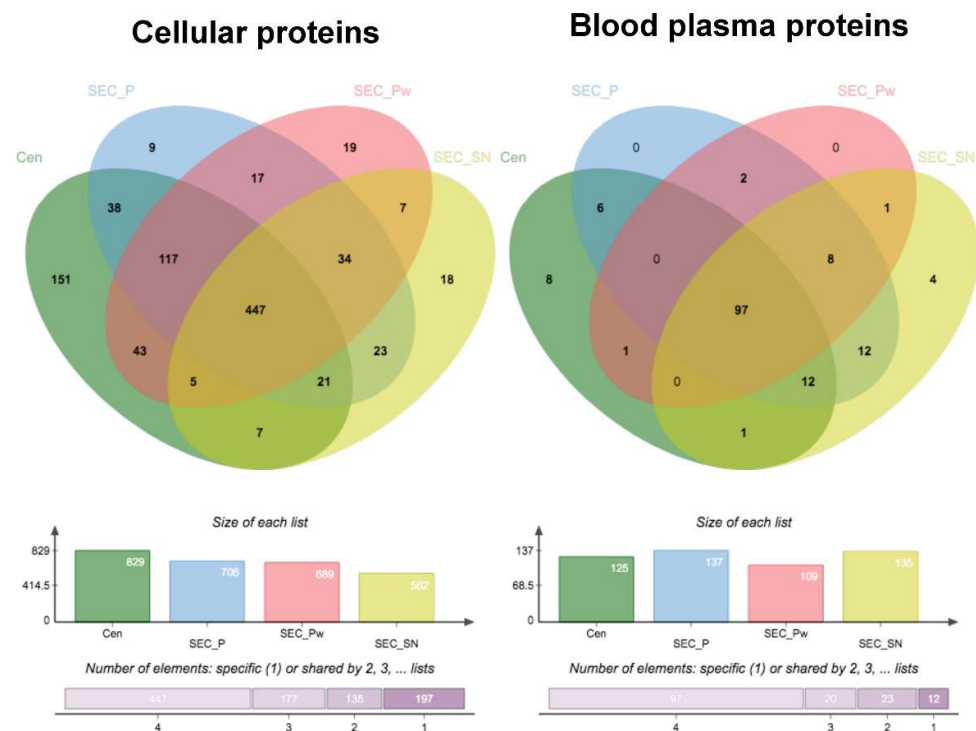

**Figure S7.** Number of quantified proteins in each cEV isolation replicate. (A) The column graph on top represents the absolute and the one below the relative numbers of proteins quantified to the protein class indicated on top. Each centrifugation replicate is the sum of three repetitive nLC-MS2 analyses for each cEV isolate, while the SEC replicates are the sum of fractions six to eight. (B) The Venn diagrams compare the number of proteins quantified in at least two out of three replicates per method with cellular proteins on the left-hand side and blood plasma contaminants on the right, respectively.

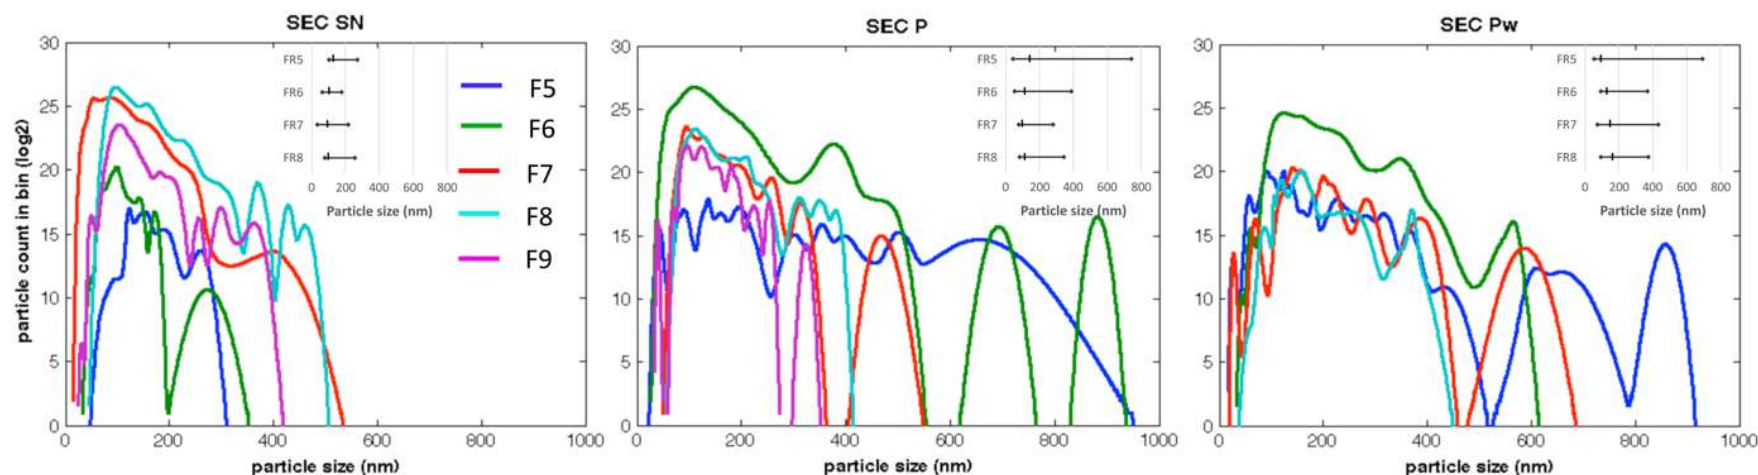

**Figure S8.** Particle size distribution in SEC fractions. The nano-particle size distribution in fractions five to nine (F5 to F9) were determined from fractions collected by direct SEC separation of PFP (SEC SN, left), after pre-purification of cEV by one high-speed centrifugation (SEC P, middle), or three-times centrifugation/washes (SEC Pw, right). The size distribution for fractions F5 to F8 are given as inserts with the size of the maximum particle count indicated by a vertical line and a horizontal line stretching from left to right from the size where 1% to 99% of all counts were measured.

### Supplementary Reference

1. Greganova, E., Heller, M. & Butikofer, P. (2010) A structural domain mediates attachment of ethanolamine phosphoglycerol to eukaryotic elongation factor 1A in *Trypanosoma brucei*, *PLoS One*. **5**, e9486.
2. Braga-Lagache, S., Buchs, N., Iacovache, M. I., Zuber, B., Jackson, C. B. & Heller, M. (2016) Robust Label-free, Quantitative Profiling of Circulating Plasma Microparticle (MP) Associated Proteins, *Molecular & Cellular Proteomics*. **15**, 3640-3652.
