# Supplementary material for: Effect of Sample Transportation on the Proteome of Human Circulating Blood Extracellular Vesicles
Source: Int J Mol Sci. 2022 Apr 19;23(9):4515. doi: 10.3390/ijms23094515 (PMC9099550; doi:10.3390/ijms23094515)
Supplement: Supplementary file 1 [file ijms-23-04515-s001.zip › proteinGroups_DE_test.xlsx]

## Sheet: separate normalization PFP, PPP
GN	Leading_Protein	ID	nr GN	Protein class	Serum/Plasma factor	Other connections	Exosome	Blood microparticle	Exosome	Blood microparticle	Burkhart platelet proteome	# cells	Cell marker	marker class	Endothial cell	Stem/Progenitor	T Cell	B Cell	NK cell	Lymphocytes	Dendritic cell	Monoc./Macroph.	Granulocyte	Leukocyte	Platelet	Erythrocyte	Potential contaminant	Fasta headers	Majority protein IDs	Q-value	Score	Protein IDs	Number of proteins	Razor + unique peptides	Sequence coverage [%]	Mol. weight [kDa]	Sequence length	Intensity	MS/MS count	iBAQ	Top3 Selected PFP	Top3 Selected PPP	cnts PFP_C	cnts PFP_PTS	cnts PPP_C	cnts PPP_PTS	cnts PFP	cnts PPP	cnts ALL
TFRC	P02786	TFR1_HUMAN	+	cellmembrane			+	+	+	+	+	2	CD71	+EC	+	+												Transferrin receptor protein 1 OS=Homo sapiens OX=9606 GN=TFRC PE=1 SV=2	sp|P02786|TFR1_HUMAN	0	173.47	sp|P02786|TFR1_HUMAN	1	36	49.3	84.87	760	12053000000	1309	301310000	1	1	11	12	11	11	23	22	45
ESAM	Q96AP7	ESAM_HUMAN	+	cellmembrane		Cell junction					+	1	ESAM	+EC	+													Endothelial cell-selective adhesion molecule OS=Homo sapiens OX=9606 GN=ESAM PE=1 SV=1	sp|Q96AP7|ESAM_HUMAN	0	210.4	sp|Q96AP7|ESAM_HUMAN	1	15	56.2	41.176	390	23137000000	1442	1285400000	1	1	11	12	12	12	23	24	47
HSPG2	P98160	PGBM_HUMAN	+	cellsurface		focal adhesion	+		+		+	1	HSPG2	+EC	+													Basement membrane-specific heparan sulfate proteoglycan core protein OS=Homo sapiens OX=9606 GN=HSPG2 PE=1 SV=4	sp|P98160|PGBM_HUMAN	0	67.666	sp|P98160|PGBM_HUMAN	1	45	18.5	468.83	4391	1350900000	452	7808600	1	1	7	8	10	11	15	21	36
ICAM2	P13598	ICAM2_HUMAN	+	cellmembrane							+	4	CD102	+EC/Lc	+		+	+		+		+		+				Intercellular adhesion molecule 2 OS=Homo sapiens OX=9606 GN=ICAM2 PE=1 SV=2	sp|P13598|ICAM2_HUMAN	0	116.24	sp|P13598|ICAM2_HUMAN	1	5	21.8	30.654	275	21198000000	840	1324900000	1	1	12	12	12	12	24	24	48
SLC4A1	P02730	B3AT_HUMAN	+	cellmembrane			+	+	+	+	+	1	CD233	+Ery												+		Band 3 anion transport protein OS=Homo sapiens OX=9606 GN=SLC4A1 PE=1 SV=3;Isoform 2 of Band 3 anion transport protein OS=Homo sapiens OX=9606 GN=SLC4A1	sp|P02730|B3AT_HUMAN;sp|P02730-2|B3AT_HUMAN	0	323.31	sp|P02730|B3AT_HUMAN;sp|P02730-2|B3AT_HUMAN	2	39	60.9	101.79	911	164830000000	5490	5151100000	1	1	12	12	12	12	24	24	48
GYPA	P02724-3	GLPA_HUMAN	+	cellmembrane								2	CD235a	+Ery		+										+		Isoform 3 of Glycophorin-A OS=Homo sapiens OX=9606 GN=GYPA;Isoform 2 of Glycophorin-A OS=Homo sapiens OX=9606 GN=GYPA;Glycophorin-A OS=Homo sapiens OX=9606 GN=GYPA PE=1 SV=2	sp|P02724-3|GLPA_HUMAN;sp|P02724-2|GLPA_HUMAN;sp|P02724|GLPA_HUMAN	0	18.003	sp|P02724-3|GLPA_HUMAN;sp|P02724-2|GLPA_HUMAN;sp|P02724|GLPA_HUMAN	3	3	57.3	13	117	318020000	101	63604000	1	0	7	8	0	0	15	0	15
GYPC	P04921-2	GLPC_HUMAN	+	cellmembrane								2	CD236	+Ery		+										+		Isoform Glycophorin-D of Glycophorin-C OS=Homo sapiens OX=9606 GN=GYPC;Isoform 3 of Glycophorin-C OS=Homo sapiens OX=9606 GN=GYPC;Glycophorin-C OS=Homo sapiens OX=9606 GN=GYPC PE=1 SV=1	sp|P04921-2|GLPC_HUMAN;sp|P04921-3|GLPC_HUMAN;sp|P04921|GLPC_HUMAN	0	50.741	sp|P04921-2|GLPC_HUMAN;sp|P04921-3|GLPC_HUMAN;sp|P04921|GLPC_HUMAN	3	2	25.2	11.499	107	1800400000	242	600130000	1	1	11	11	8	9	22	17	39
CD37	P11049-3	CD37_HUMAN	+	cellmembrane			+		+		+	4	CD37	+Lc			+	+		+		+	+	+				Isoform 3 of Leukocyte antigen CD37 OS=Homo sapiens OX=9606 GN=CD37;Isoform 2 of Leukocyte antigen CD37 OS=Homo sapiens OX=9606 GN=CD37;Leukocyte antigen CD37 OS=Homo sapiens OX=9606 GN=CD37 PE=1 SV=2	sp|P11049-3|CD37_HUMAN;sp|P11049-2|CD37_HUMAN;sp|P11049|CD37_HUMAN	0.0011855	7.2778	sp|P11049-3|CD37_HUMAN;sp|P11049-2|CD37_HUMAN;sp|P11049|CD37_HUMAN	3	3	27.2	22.563	202	245260000	76	24526000	1	1	4	5	5	5	9	10	19
PTPRC	P08575-4	PTPRC_HUMAN	+	cellmembrane		focal adhesion	+		+		+	7	CD45	+Lc		+	+	+	+	+	+	+	+	+				Isoform 2 of Receptor-type tyrosine-protein phosphatase C OS=Homo sapiens OX=9606 GN=PTPRC;Isoform 7 of Receptor-type tyrosine-protein phosphatase C OS=Homo sapiens OX=9606 GN=PTPRC;Isoform 8 of Receptor-type tyrosine-protein phosphatase C OS=Homo sapiens	sp|P08575-4|PTPRC_HUMAN;sp|P08575-9|PTPRC_HUMAN;sp|P08575-10|PTPRC_HUMAN;sp|P08575-8|PTPRC_HUMAN;sp|P08575-7|PTPRC_HUMAN;sp|P08575-5|PTPRC_HUMAN;sp|P08575-6|PTPRC_HUMAN;sp|P08575|PTPRC_HUMAN	0	41.025	sp|P08575-4|PTPRC_HUMAN;sp|P08575-9|PTPRC_HUMAN;sp|P08575-10|PTPRC_HUMAN;sp|P08575-8|PTPRC_HUMAN;sp|P08575-7|PTPRC_HUMAN;sp|P08575-5|PTPRC_HUMAN;sp|P08575-6|PTPRC_HUMAN;sp|P08575|PTPRC_HUMAN	8	32	36.2	131.13	1145	5791800000	913	101610000	1	1	11	11	11	11	22	22	44
CD40	P25942	TNR5_HUMAN	+	cellmembrane			+		+		+	5	CD40	+Lc/Ec	+	+		+		+	+	+		+				Tumor necrosis factor receptor superfamily member 5 OS=Homo sapiens OX=9606 GN=CD40 PE=1 SV=1;Isoform II of Tumor necrosis factor receptor superfamily member 5 OS=Homo sapiens OX=9606 GN=CD40	sp|P25942|TNR5_HUMAN;sp|P25942-2|TNR5_HUMAN	0	160.65	sp|P25942|TNR5_HUMAN;sp|P25942-2|TNR5_HUMAN	2	8	50.5	30.619	277	9299300000	482	774940000	1	1	9	7	12	12	16	24	40
SLC44A1	Q8WWI5	CTL1_HUMAN	+	cellmembrane			+		+		+	5	CD92	+Lc/Ec	+		+	+		+		+	+	+				Choline transporter-like protein 1 OS=Homo sapiens OX=9606 GN=SLC44A1 PE=1 SV=1;Isoform 3 of Choline transporter-like protein 1 OS=Homo sapiens OX=9606 GN=SLC44A1;Isoform 2 of Choline transporter-like protein 1 OS=Homo sapiens OX=9606 GN=SLC44A1	sp|Q8WWI5|CTL1_HUMAN;sp|Q8WWI5-3|CTL1_HUMAN;sp|Q8WWI5-2|CTL1_HUMAN	0	37.896	sp|Q8WWI5|CTL1_HUMAN;sp|Q8WWI5-3|CTL1_HUMAN;sp|Q8WWI5-2|CTL1_HUMAN	3	17	20.7	73.301	657	9693400000	906	323110000	1	1	12	12	11	11	24	22	46
CD14	P08571	CD14_HUMAN	+	cellmembrane			+		+			2	CD14	+Macro								+	+	+				Monocyte differentiation antigen CD14 OS=Homo sapiens OX=9606 GN=CD14 PE=1 SV=2	sp|P08571|CD14_HUMAN	0	175.32	sp|P08571|CD14_HUMAN	1	12	54.7	40.076	375	7207500000	1490	450470000	1	1	12	12	12	12	24	24	48
ADAM10	O14672	ADA10_HUMAN	+	cellmembrane		Cell junction	+		+		+	1	CD156c	+Mc								+		+				Disintegrin and metalloproteinase domain-containing protein 10 OS=Homo sapiens OX=9606 GN=ADAM10 PE=1 SV=1;Isoform 2 of Disintegrin and metalloproteinase domain-containing protein 10 OS=Homo sapiens OX=9606 GN=ADAM10	sp|O14672|ADA10_HUMAN;sp|O14672-2|ADA10_HUMAN	0	323.31	sp|O14672|ADA10_HUMAN;sp|O14672-2|ADA10_HUMAN	2	46	52.7	84.141	748	92761000000	3876	2319000000	1	1	11	12	12	12	23	24	47
ITGA2B	P08514	ITA2B_HUMAN	+	cellmembrane		focal adhesion	+	+	+	+	+	2	CD41	+Pl		+									+			Integrin alpha-IIb OS=Homo sapiens OX=9606 GN=ITGA2B PE=1 SV=3;Isoform 2 of Integrin alpha-IIb OS=Homo sapiens OX=9606 GN=ITGA2B;Isoform 3 of Integrin alpha-IIb OS=Homo sapiens OX=9606 GN=ITGA2B	sp|P08514|ITA2B_HUMAN;sp|P08514-2|ITA2B_HUMAN;sp|P08514-3|ITA2B_HUMAN	0	323.31	sp|P08514|ITA2B_HUMAN;sp|P08514-2|ITA2B_HUMAN;sp|P08514-3|ITA2B_HUMAN	3	84	58.5	113.38	1039	4904600000000	41478	132560000000	1	1	12	12	12	12	24	24	48
SELP	P16109	LYAM3_HUMAN	+	cellmembrane							+	2	CD62P	+Pl	+										+			P-selectin OS=Homo sapiens OX=9606 GN=SELP PE=1 SV=3	sp|P16109|LYAM3_HUMAN	0	323.31	sp|P16109|LYAM3_HUMAN	1	52	51.9	90.833	830	292270000000	6907	10078000000	1	1	11	12	12	12	23	24	47
CD36	P16671	CD36_HUMAN	+	cellmembrane							+	6	CD36	+Pl/Ec/Mc	+	+					+	+		+	+	+		Platelet glycoprotein 4 OS=Homo sapiens OX=9606 GN=CD36 PE=1 SV=2;Isoform 4 of Platelet glycoprotein 4 OS=Homo sapiens OX=9606 GN=CD36;Isoform 3 of Platelet glycoprotein 4 OS=Homo sapiens OX=9606 GN=CD36	sp|P16671|CD36_HUMAN;sp|P16671-4|CD36_HUMAN;sp|P16671-3|CD36_HUMAN	0	323.31	sp|P16671|CD36_HUMAN;sp|P16671-4|CD36_HUMAN;sp|P16671-3|CD36_HUMAN;sp|P16671-2|CD36_HUMAN	4	26	47	53.053	472	269920000000	4359	16870000000	1	1	12	12	12	12	24	24	48
ITGB3	P05106	ITB3_HUMAN	+	cellmembrane		Cell junction	+		+		+	3	CD61	+Pl/Ec/Mc	+							+		+	+			Integrin beta-3 OS=Homo sapiens OX=9606 GN=ITGB3 PE=1 SV=2;Isoform Beta-3B of Integrin beta-3 OS=Homo sapiens OX=9606 GN=ITGB3;Isoform Beta-3C of Integrin beta-3 OS=Homo sapiens OX=9606 GN=ITGB3	sp|P05106|ITB3_HUMAN;sp|P05106-2|ITB3_HUMAN;sp|P05106-3|ITB3_HUMAN	0	323.31	sp|P05106|ITB3_HUMAN;sp|P05106-2|ITB3_HUMAN;sp|P05106-3|ITB3_HUMAN	3	90	68.4	87.057	788	4799200000000	31126	137120000000	1	1	12	12	12	12	24	24	48
CD109	Q6YHK3	CD109_HUMAN	+	cellmembrane							+	4	CD109	+Tc/Ec/Pl	+	+	+			+				+	+			CD109 antigen OS=Homo sapiens OX=9606 GN=CD109 PE=1 SV=2;Isoform 4 of CD109 antigen OS=Homo sapiens OX=9606 GN=CD109;Isoform 2 of CD109 antigen OS=Homo sapiens OX=9606 GN=CD109;Isoform 3 of CD109 antigen OS=Homo sapiens OX=9606 GN=CD109	sp|Q6YHK3|CD109_HUMAN;sp|Q6YHK3-4|CD109_HUMAN;sp|Q6YHK3-2|CD109_HUMAN;sp|Q6YHK3-3|CD109_HUMAN	0	99.712	sp|Q6YHK3|CD109_HUMAN;sp|Q6YHK3-4|CD109_HUMAN;sp|Q6YHK3-2|CD109_HUMAN;sp|Q6YHK3-3|CD109_HUMAN	4	22	26.3	161.69	1445	3050100000	603	50002000	1	1	10	8	12	12	18	24	42
PECAM1	P16284-6	PECA1_HUMAN	+	cellmembrane		Cell junction	+		+		+	7	CD31	+ubiq.	+		+	+	+	+		+	+	+	+			Isoform Delta15 of Platelet endothelial cell adhesion molecule OS=Homo sapiens OX=9606 GN=PECAM1;Platelet endothelial cell adhesion molecule OS=Homo sapiens OX=9606 GN=PECAM1 PE=1 SV=2;Isoform Delta13 of Platelet endothelial cell adhesion molecule OS=Homo	sp|P16284-6|PECA1_HUMAN;sp|P16284|PECA1_HUMAN;sp|P16284-3|PECA1_HUMAN;sp|P16284-2|PECA1_HUMAN;sp|P16284-5|PECA1_HUMAN;sp|P16284-4|PECA1_HUMAN	0	323.31	sp|P16284-6|PECA1_HUMAN;sp|P16284|PECA1_HUMAN;sp|P16284-3|PECA1_HUMAN;sp|P16284-2|PECA1_HUMAN;sp|P16284-5|PECA1_HUMAN;sp|P16284-4|PECA1_HUMAN	6	55	61.3	81.363	727	444410000000	9059	10581000000	1	1	12	12	12	12	24	24	48
CD9	P21926	CD9_HUMAN	+	cellmembrane		focal adhesion	+		+		+	6	CD9	+ubiq.	+		+	+		+		+	+	+	+			CD9 antigen OS=Homo sapiens OX=9606 GN=CD9 PE=1 SV=4	sp|P21926|CD9_HUMAN	0	323.31	sp|P21926|CD9_HUMAN	1	11	26.3	25.416	228	225600000000	2556	37600000000	1	1	12	12	12	12	24	24	48
CD81	P60033	CD81_HUMAN	+	cellmembrane		focal adhesion	+		+		+	7	CD81	+ubiq./Exo	+	+	+	+	+	+	+	+		+				CD81 antigen OS=Homo sapiens OX=9606 GN=CD81 PE=1 SV=1	sp|P60033|CD81_HUMAN	0.0016077	4.6139	sp|P60033|CD81_HUMAN	1	3	25	25.809	236	334780000	41	47825000	1	0	8	9	0	0	17	0	17
IGLL1	P15814	IGLL1_HUMAN	+	cellsurface								1	CD179b	Bc				+		+				+				Immunoglobulin lambda-like polypeptide 1 OS=Homo sapiens OX=9606 GN=IGLL1 PE=1 SV=1	sp|P15814|IGLL1_HUMAN	0.0014749	2.938	sp|P15814|IGLL1_HUMAN	1	2	14.1	22.963	213	79782000	6	7252900	0	1	0	0	1	1	0	2	2
CLEC4M	Q9H2X3	CLC4M_HUMAN	+	cellmembrane								1	CD299	Ec	+													C-type lectin domain family 4 member M OS=Homo sapiens OX=9606 GN=CLEC4M PE=1 SV=1;Isoform 8 of C-type lectin domain family 4 member M OS=Homo sapiens OX=9606 GN=CLEC4M;Isoform 10 of C-type lectin domain family 4 member M OS=Homo sapiens OX=9606 GN=CLEC4M;	sp|Q9H2X3|CLC4M_HUMAN;sp|Q9H2X3-8|CLC4M_HUMAN;sp|Q9H2X3-10|CLC4M_HUMAN;sp|Q9H2X3-9|CLC4M_HUMAN;sp|Q9H2X3-3|CLC4M_HUMAN;sp|Q9H2X3-5|CLC4M_HUMAN;sp|Q9H2X3-2|CLC4M_HUMAN;sp|Q9H2X3-7|CLC4M_HUMAN;sp|Q9H2X3-6|CLC4M_HUMAN	0.0056364	2.2511	sp|Q9H2X3|CLC4M_HUMAN;sp|Q9H2X3-8|CLC4M_HUMAN;sp|Q9H2X3-10|CLC4M_HUMAN;sp|Q9H2X3-9|CLC4M_HUMAN;sp|Q9H2X3-3|CLC4M_HUMAN;sp|Q9H2X3-5|CLC4M_HUMAN;sp|Q9H2X3-2|CLC4M_HUMAN;sp|Q9H2X3-7|CLC4M_HUMAN;sp|Q9H2X3-6|CLC4M_HUMAN;sp|Q9NNX6-12|CD209_HUMAN;sp|Q9NNX6-3|CD209_HUMAN;sp|Q9NNX6-8|CD209_HUMAN;sp|Q9H2X3-4|CLC4M_HUMAN;sp|Q9NNX6-11|CD209_HUMAN;sp|Q9NNX6-7|CD209_HUMAN;sp|Q9NNX6-10|CD209_HUMAN;sp|Q9NNX6-6|C…	20	3	13.5	45.35	399	16024000	8	640950	1	0	1	1	0	0	2	0	2
CD93	Q9NPY3	C1QR1_HUMAN	+	cellmembrane							+	3	CD93	Ec/Mc	+							+	+	+				Complement component C1q receptor OS=Homo sapiens OX=9606 GN=CD93 PE=1 SV=3	sp|Q9NPY3|C1QR1_HUMAN	0.0019342	2.6603	sp|Q9NPY3|C1QR1_HUMAN	1	2	6.1	68.559	652	109720000	11	4770500	0	1	0	0	1	1	0	2	2
CLEC12A	Q5QGZ9-4	CL12A_HUMAN	+	cellmembrane								3	CD371	Lc							+	+	+	+				Isoform 4 of C-type lectin domain family 12 member A OS=Homo sapiens OX=9606 GN=CLEC12A;C-type lectin domain family 12 member A OS=Homo sapiens OX=9606 GN=CLEC12A PE=1 SV=3;Isoform 1 of C-type lectin domain family 12 member A OS=Homo sapiens OX=9606 GN=CLE	sp|Q5QGZ9-4|CL12A_HUMAN;sp|Q5QGZ9|CL12A_HUMAN;sp|Q5QGZ9-1|CL12A_HUMAN;sp|Q5QGZ9-5|CL12A_HUMAN	0.0014896	3.1545	sp|Q5QGZ9-4|CL12A_HUMAN;sp|Q5QGZ9|CL12A_HUMAN;sp|Q5QGZ9-1|CL12A_HUMAN;sp|Q5QGZ9-5|CL12A_HUMAN	4	3	20.7	27.276	232	64140000	18	5345000	1	1	1	1	0	1	2	1	3
SELL	P14151	LYAM1_HUMAN	+	cellmembrane								5	CD62L	Lc			+	+	+	+		+	+	+				L-selectin OS=Homo sapiens OX=9606 GN=SELL PE=1 SV=2;Isoform 2 of L-selectin OS=Homo sapiens OX=9606 GN=SELL	sp|P14151|LYAM1_HUMAN;sp|P14151-2|LYAM1_HUMAN	0.0090539	1.8235	sp|P14151|LYAM1_HUMAN;sp|P14151-2|LYAM1_HUMAN	2	2	9.7	42.187	372	6637800	3	663780	0	0	0	0	0	0	0	0	0
CD97	P48960-2	CD97_HUMAN	+	cellmembrane		focal adhesion	+		+		+	6	CD97	Lc			+	+	+	+	+	+	+	+				Isoform 2 of CD97 antigen OS=Homo sapiens OX=9606 GN=CD97;Isoform 3 of CD97 antigen OS=Homo sapiens OX=9606 GN=CD97;CD97 antigen OS=Homo sapiens OX=9606 GN=CD97 PE=1 SV=4	sp|P48960-2|CD97_HUMAN;sp|P48960-3|CD97_HUMAN;sp|P48960|CD97_HUMAN	0	17.317	sp|P48960-2|CD97_HUMAN;sp|P48960-3|CD97_HUMAN;sp|P48960|CD97_HUMAN	3	6	14.3	81.742	742	57139000	23	2040700	1	1	1	1	1	1	2	2	4
CD59	P13987	CD59_HUMAN	+	cellmembrane		focal adhesion	+		+		+	5	CD59	Lc/Ery			+		+	+		+	+	+		+		CD59 glycoprotein OS=Homo sapiens OX=9606 GN=CD59 PE=1 SV=1;Isoform 2 of CD59 glycoprotein OS=Homo sapiens OX=9606 GN=CD59	sp|P13987|CD59_HUMAN;sp|P13987-2|CD59_HUMAN	0.00062617	9.3661	sp|P13987|CD59_HUMAN;sp|P13987-2|CD59_HUMAN	2	6	28.1	14.177	128	7460800000	571	1243500000	1	1	12	12	12	12	24	24	48
CD33	P20138-2	CD33_HUMAN	+	cellmembrane								4	CD33	Mc		+					+	+	+	+				Isoform 3 of Myeloid cell surface antigen CD33 OS=Homo sapiens OX=9606 GN=CD33;Myeloid cell surface antigen CD33 OS=Homo sapiens OX=9606 GN=CD33 PE=1 SV=2	sp|P20138-2|CD33_HUMAN;sp|P20138|CD33_HUMAN	0.0019436	2.7322	sp|P20138-2|CD33_HUMAN;sp|P20138|CD33_HUMAN	2	2	6.5	33.889	310	50585000	11	3613200	1	0	1	1	0	0	2	0	2
MPL	P40238-2	TPOR_HUMAN	+	cellmembrane							+	3	CD110	Pl/Ec	+	+									+			Isoform 2 of Thrombopoietin receptor OS=Homo sapiens OX=9606 GN=MPL;Thrombopoietin receptor OS=Homo sapiens OX=9606 GN=MPL PE=1 SV=1	sp|P40238-2|TPOR_HUMAN;sp|P40238|TPOR_HUMAN	0	19.668	sp|P40238-2|TPOR_HUMAN;sp|P40238|TPOR_HUMAN	2	7	25.4	65.521	579	562840000	137	26802000	1	1	1	2	8	8	3	16	19
CD151	P48509	CD151_HUMAN	+	cellmembrane		focal adhesion					+	3	CD151	Pl/Ec	+	+									+			CD151 antigen OS=Homo sapiens OX=9606 GN=CD151 PE=1 SV=3	sp|P48509|CD151_HUMAN	0.0015	3.336	sp|P48509|CD151_HUMAN	1	2	9.5	28.295	253	11349000000	221	1134900000	1	1	8	9	10	10	17	20	37
NECTIN2	Q92692-2	NECT2_HUMAN	+	cellmembrane		Cell junction	+		+			4	CD112	Pl/Ec/Mc	+	+						+		+	+			Isoform Alpha of Nectin-2 OS=Homo sapiens OX=9606 GN=NECTIN2;Nectin-2 OS=Homo sapiens OX=9606 GN=NECTIN2 PE=1 SV=1	sp|Q92692-2|NECT2_HUMAN;sp|Q92692|NECT2_HUMAN	0.0017361	6.595	sp|Q92692-2|NECT2_HUMAN;sp|Q92692|NECT2_HUMAN	2	5	15.4	51.359	479	583430000	61	29171000	0	1	0	0	8	8	0	16	16
THBD	P07204	TRBM_HUMAN	+	cellmembrane								4	CD141	Pl/Mc	+							+	+	+	+			Thrombomodulin OS=Homo sapiens OX=9606 GN=THBD PE=1 SV=2	sp|P07204|TRBM_HUMAN	0.001693	5.913	sp|P07204|TRBM_HUMAN	1	3	13.9	60.329	575	82723000	8	8272300	0	0	0	0	0	0	0	0	0
LAMP1	P11279	LAMP1_HUMAN	+	cellmembrane		Endosome	+		+		+	4	CD107a		+		+			+			+	+	+			Lysosome-associated membrane glycoprotein 1 OS=Homo sapiens OX=9606 GN=LAMP1 PE=1 SV=3;Isoform 2 of Lysosome-associated membrane glycoprotein 1 OS=Homo sapiens OX=9606 GN=LAMP1	sp|P11279|LAMP1_HUMAN;sp|P11279-2|LAMP1_HUMAN	0	43.429	sp|P11279|LAMP1_HUMAN;sp|P11279-2|LAMP1_HUMAN	2	6	12	44.882	417	8151300000	614	429010000	1	1	11	10	12	12	21	24	45
ITGAL	P20701-2	ITAL_HUMAN	+	cellmembrane			+		+			5	CD11a				+	+	+	+		+	+	+				Isoform 2 of Integrin alpha-L OS=Homo sapiens OX=9606 GN=ITGAL;Integrin alpha-L OS=Homo sapiens OX=9606 GN=ITGAL PE=1 SV=3;Isoform 3 of Integrin alpha-L OS=Homo sapiens OX=9606 GN=ITGAL	sp|P20701-2|ITAL_HUMAN;sp|P20701|ITAL_HUMAN;sp|P20701-3|ITAL_HUMAN	0.0015649	4.1489	sp|P20701-2|ITAL_HUMAN;sp|P20701|ITAL_HUMAN;sp|P20701-3|ITAL_HUMAN	3	4	5.3	134.43	1223	29620000	12	722430	1	1	0	2	0	1	2	1	3
ITGAM	P11215	ITAM_HUMAN	+	cellmembrane			+		+			6	CD11b				+	+	+	+	+	+	+	+				Integrin alpha-M OS=Homo sapiens OX=9606 GN=ITGAM PE=1 SV=2;Isoform 2 of Integrin alpha-M OS=Homo sapiens OX=9606 GN=ITGAM	sp|P11215|ITAM_HUMAN;sp|P11215-2|ITAM_HUMAN	0	61.314	sp|P11215|ITAM_HUMAN;sp|P11215-2|ITAM_HUMAN;sp|Q13349|ITAD_HUMAN	3	21	27.3	127.18	1152	610980000	171	10910000	1	1	5	5	1	2	10	3	13
ANPEP	P15144	AMPN_HUMAN	+	cellmembrane			+		+			5	CD13		+	+	+			+		+	+	+				Aminopeptidase N OS=Homo sapiens OX=9606 GN=ANPEP PE=1 SV=4	sp|P15144|AMPN_HUMAN	0	13.901	sp|P15144|AMPN_HUMAN	1	16	26.2	109.54	967	271090000	96	6024100	1	1	3	3	3	3	6	6	12
IL6ST	P40189	IL6RB_HUMAN	+	cellmembrane			+		+		+	7	CD130		+	+	+	+	+	+		+	+	+				Interleukin-6 receptor subunit beta OS=Homo sapiens OX=9606 GN=IL6ST PE=1 SV=2;Isoform 3 of Interleukin-6 receptor subunit beta OS=Homo sapiens OX=9606 GN=IL6ST	sp|P40189|IL6RB_HUMAN;sp|P40189-3|IL6RB_HUMAN	0.001675	5.6754	sp|P40189|IL6RB_HUMAN;sp|P40189-3|IL6RB_HUMAN;sp|P40189-2|IL6RB_HUMAN	3	8	13.9	103.54	918	675500000	98	15352000	1	1	2	2	10	11	4	21	25
BSG	P35613	BASI_HUMAN	+	cellmembrane		focal adhesion	+		+		+	8	CD147		+		+	+	+	+		+	+	+	+	+		Basigin OS=Homo sapiens OX=9606 GN=BSG PE=1 SV=2;Isoform 2 of Basigin OS=Homo sapiens OX=9606 GN=BSG;Isoform 4 of Basigin OS=Homo sapiens OX=9606 GN=BSG	sp|P35613|BASI_HUMAN;sp|P35613-2|BASI_HUMAN;sp|P35613-4|BASI_HUMAN	0	125.87	sp|P35613|BASI_HUMAN;sp|P35613-2|BASI_HUMAN;sp|P35613-4|BASI_HUMAN	3	8	28.3	42.2	385	24536000000	1211	1635700000	1	1	12	12	12	12	24	24	48
PTPRJ	Q12913	PTPRJ_HUMAN	+	cellmembrane		Cell junction	+		+		+	7	CD148				+	+	+	+	+	+	+	+	+			Receptor-type tyrosine-protein phosphatase eta OS=Homo sapiens OX=9606 GN=PTPRJ PE=1 SV=3	sp|Q12913|PTPRJ_HUMAN	0	323.31	sp|Q12913|PTPRJ_HUMAN;sp|Q12913-2|PTPRJ_HUMAN	2	47	36.1	145.94	1337	78116000000	4123	1394900000	1	1	12	12	12	12	24	24	48
FCGR3B	O75015	FCG3B_HUMAN	+	cellmembrane			+		+			1	CD16b										+	+				Low affinity immunoglobulin gamma Fc region receptor III-B OS=Homo sapiens OX=9606 GN=FCGR3B PE=1 SV=2	sp|O75015|FCG3B_HUMAN	0.0086639	1.9019	sp|O75015|FCG3B_HUMAN	1	3	14.2	26.216	233	60930000	18	8704200	1	1	2	3	1	1	5	2	7
ITGB2	P05107	ITB2_HUMAN	+	cellmembrane			+		+			7	CD18				+	+	+	+	+	+	+	+	+			Integrin beta-2 OS=Homo sapiens OX=9606 GN=ITGB2 PE=1 SV=2	sp|P05107|ITB2_HUMAN	0	117.61	sp|P05107|ITB2_HUMAN	1	18	34.9	84.781	769	1883900000	582	42815000	1	1	10	11	5	6	21	11	32
CXCR4	P61073	CXCR4_HUMAN	+	cellmembrane		Cell junction	+		+		+	5	CD184		+		+	+		+	+	+		+				C-X-C chemokine receptor type 4 OS=Homo sapiens OX=9606 GN=CXCR4 PE=1 SV=1;Isoform 2 of C-X-C chemokine receptor type 4 OS=Homo sapiens OX=9606 GN=CXCR4	sp|P61073|CXCR4_HUMAN;sp|P61073-2|CXCR4_HUMAN	0	31.229	sp|P61073|CXCR4_HUMAN;sp|P61073-2|CXCR4_HUMAN	2	3	8.8	39.745	352	365620000	69	36562000	1	1	5	4	5	7	9	12	21
GGT1	P19440	GGT1_HUMAN	+	cellmembrane			+		+		+	5	CD224		+	+	+	+		+		+		+				Glutathione hydrolase 1 proenzyme OS=Homo sapiens OX=9606 GN=GGT1 PE=1 SV=2;Isoform 2 of Glutathione hydrolase 1 proenzyme OS=Homo sapiens OX=9606 GN=GGT1	sp|P19440|GGT1_HUMAN;sp|P19440-2|GGT1_HUMAN	0	12.623	sp|P19440|GGT1_HUMAN;sp|P19440-2|GGT1_HUMAN;sp|Q14390|GGTL2_HUMAN;sp|P19440-3|GGT1_HUMAN;sp|B5MD39|GGTL3_HUMAN	5	7	15.8	61.409	569	193840000	34	8427700	0	1	0	0	3	3	0	6	6
CD226	Q15762	CD226_HUMAN	+	cellmembrane							+	6	CD226			+	+	+	+	+		+		+	+			CD226 antigen OS=Homo sapiens OX=9606 GN=CD226 PE=1 SV=2	sp|Q15762|CD226_HUMAN	0	231.04	sp|Q15762|CD226_HUMAN	1	6	29.2	38.614	336	52382000000	1454	3741500000	1	1	12	12	12	12	24	24	48
PRNP	P04156	PRIO_HUMAN	+	cellmembrane			+		+		+	8	CD230		+	+	+	+	+	+	+	+	+	+				Major prion protein OS=Homo sapiens OX=9606 GN=PRNP PE=1 SV=1	sp|P04156|PRIO_HUMAN	0	13.431	sp|P04156|PRIO_HUMAN	1	3	10.3	27.661	253	1819200000	168	202140000	1	1	3	3	9	9	6	18	24
RHCE	P18577-11	RHCE_HUMAN	+	cellmembrane								2	CD240CE			+										+		Isoform 8a of Blood group Rh(CE) polypeptide OS=Homo sapiens OX=9606 GN=RHCE;Blood group Rh(CE) polypeptide OS=Homo sapiens OX=9606 GN=RHCE PE=1 SV=2;Isoform 4g of Blood group Rh(CE) polypeptide OS=Homo sapiens OX=9606 GN=RHCE;Isoform RHVIII of Blood group	sp|P18577-11|RHCE_HUMAN;sp|P18577|RHCE_HUMAN;sp|P18577-9|RHCE_HUMAN;sp|P18577-4|RHCE_HUMAN;sp|P18577-10|RHCE_HUMAN;sp|Q02161|RHD_HUMAN	0	15.28	sp|P18577-11|RHCE_HUMAN;sp|P18577|RHCE_HUMAN;sp|P18577-9|RHCE_HUMAN;sp|P18577-4|RHCE_HUMAN;sp|P18577-10|RHCE_HUMAN;sp|Q02161|RHD_HUMAN;sp|P18577-8|RHCE_HUMAN;sp|P18577-7|RHCE_HUMAN;sp|P18577-2|RHCE_HUMAN;sp|P18577-5|RHCE_HUMAN;sp|P18577-6|RHCE_HUMAN	11	5	13.3	37.642	346	203420000	29	25427000	1	1	5	4	3	4	9	7	16
CD244	Q9BZW8-3	CD244_HUMAN	+	cellmembrane							+	5	CD244				+		+	+	+	+	+	+				Isoform 3 of Natural killer cell receptor 2B4 OS=Homo sapiens OX=9606 GN=CD244;Isoform 2 of Natural killer cell receptor 2B4 OS=Homo sapiens OX=9606 GN=CD244;Isoform 4 of Natural killer cell receptor 2B4 OS=Homo sapiens OX=9606 GN=CD244;Natural killer cell	sp|Q9BZW8-3|CD244_HUMAN;sp|Q9BZW8-2|CD244_HUMAN;sp|Q9BZW8-4|CD244_HUMAN;sp|Q9BZW8|CD244_HUMAN	0.0015198	3.5405	sp|Q9BZW8-3|CD244_HUMAN;sp|Q9BZW8-2|CD244_HUMAN;sp|Q9BZW8-4|CD244_HUMAN;sp|Q9BZW8|CD244_HUMAN	4	3	17.6	36.987	329	187970000	8	14459000	0	1	0	0	1	1	0	2	2
CD274	Q9NZQ7-2	PD1L1_HUMAN	+	cellmembrane			+		+		+	6	CD274				+	+	+	+	+	+	+	+				Isoform 2 of Programmed cell death 1 ligand 1 OS=Homo sapiens OX=9606 GN=CD274;Programmed cell death 1 ligand 1 OS=Homo sapiens OX=9606 GN=CD274 PE=1 SV=1	sp|Q9NZQ7-2|PD1L1_HUMAN;sp|Q9NZQ7|PD1L1_HUMAN	0.008656	1.8964	sp|Q9NZQ7-2|PD1L1_HUMAN;sp|Q9NZQ7|PD1L1_HUMAN;sp|Q9NZQ7-3|PD1L1_HUMAN	3	3	21.6	20.246	176	236320000	26	23632000	0	1	0	0	2	2	0	4	4
ITGB1	P05556	ITB1_HUMAN	+	cellmembrane		Cell junction	+		+		+	9	CD29		+	+	+	+	+	+	+	+	+	+	+			Integrin beta-1 OS=Homo sapiens OX=9606 GN=ITGB1 PE=1 SV=2;Isoform 2 of Integrin beta-1 OS=Homo sapiens OX=9606 GN=ITGB1;Isoform 5 of Integrin beta-1 OS=Homo sapiens OX=9606 GN=ITGB1;Isoform 3 of Integrin beta-1 OS=Homo sapiens OX=9606 GN=ITGB1	sp|P05556|ITB1_HUMAN;sp|P05556-2|ITB1_HUMAN;sp|P05556-5|ITB1_HUMAN;sp|P05556-3|ITB1_HUMAN	0	323.31	sp|P05556|ITB1_HUMAN;sp|P05556-2|ITB1_HUMAN;sp|P05556-5|ITB1_HUMAN;sp|P05556-3|ITB1_HUMAN	4	62	61.9	88.414	798	368930000000	10544	11180000000	1	1	12	12	12	12	24	24	48
ATP1B3	P54709	AT1B3_HUMAN	+	cellmembrane			+		+		+	8	CD298			+	+	+	+	+	+	+	+	+	+			Sodium/potassium-transporting ATPase subunit beta-3 OS=Homo sapiens OX=9606 GN=ATP1B3 PE=1 SV=1	sp|P54709|AT1B3_HUMAN	0	13.593	sp|P54709|AT1B3_HUMAN;sp|P54709-2|AT1B3_HUMAN	2	7	44.1	31.512	279	2759400000	314	229950000	1	1	10	9	11	11	19	22	41
FCGR2A	P12318-2	FCG2A_HUMAN	+	cellmembrane							+	4	CD32					+		+		+	+	+	+			Isoform 2 of Low affinity immunoglobulin gamma Fc region receptor II-a OS=Homo sapiens OX=9606 GN=FCGR2A;Low affinity immunoglobulin gamma Fc region receptor II-a OS=Homo sapiens OX=9606 GN=FCGR2A PE=1 SV=4	sp|P12318-2|FCG2A_HUMAN;sp|P12318|FCG2A_HUMAN	0	222.88	sp|P12318-2|FCG2A_HUMAN;sp|P12318|FCG2A_HUMAN;sp|P31995|FCG2C_HUMAN;sp|P31995-2|FCG2C_HUMAN;sp|P31995-4|FCG2C_HUMAN;sp|P31995-3|FCG2C_HUMAN;sp|P31994-3|FCG2B_HUMAN;sp|P31994-4|FCG2B_HUMAN;sp|P31994|FCG2B_HUMAN	9	10	40.2	34.929	316	37537000000	1176	3753700000	1	1	11	12	12	12	23	24	47
F11R	Q9Y624	JAM1_HUMAN	+	cellmembrane		Cell junction	+		+		+	8	CD321		+		+	+	+	+		+	+	+	+	+		Junctional adhesion molecule A OS=Homo sapiens OX=9606 GN=F11R PE=1 SV=1;Isoform 2 of Junctional adhesion molecule A OS=Homo sapiens OX=9606 GN=F11R	sp|Q9Y624|JAM1_HUMAN;sp|Q9Y624-2|JAM1_HUMAN	0	323.31	sp|Q9Y624|JAM1_HUMAN;sp|Q9Y624-2|JAM1_HUMAN	2	21	72.6	32.583	299	180930000000	3976	12062000000	1	1	12	12	12	12	24	24	48
GP9	P14770	GPIX_HUMAN	+	cellmembrane							+	2	CD42a			+									+			Platelet glycoprotein IX OS=Homo sapiens OX=9606 GN=GP9 PE=1 SV=3	sp|P14770|GPIX_HUMAN	0	220.93	sp|P14770|GPIX_HUMAN	1	7	59.3	19.046	177	410180000000	2517	68364000000	1	1	12	12	12	12	24	24	48
GP1BA	P07359	GP1BA_HUMAN	+	cellmembrane			+		+		+	2	CD42b			+									+			Platelet glycoprotein Ib alpha chain OS=Homo sapiens OX=9606 GN=GP1BA PE=1 SV=2	sp|P07359|GP1BA_HUMAN	0	323.31	sp|P07359|GP1BA_HUMAN	1	30	46.3	71.539	652	280410000000	5150	12192000000	1	1	12	12	12	12	24	24	48
GP1BB	P13224	GP1BB_HUMAN	+	cellmembrane							+	2	CD42c			+									+			Platelet glycoprotein Ib beta chain OS=Homo sapiens OX=9606 GN=GP1BB PE=1 SV=1;Isoform 2 of Platelet glycoprotein Ib beta chain OS=Homo sapiens OX=9606 GN=GP1BB	sp|P13224|GP1BB_HUMAN;sp|P13224-2|GP1BB_HUMAN	0	119.78	sp|P13224|GP1BB_HUMAN;sp|P13224-2|GP1BB_HUMAN	2	13	53.9	21.717	206	407280000000	1784	81456000000	1	1	12	12	12	12	24	24	48
GP5	P40197	GPV_HUMAN	+	cellmembrane			+		+		+	2	CD42d			+									+			Platelet glycoprotein V OS=Homo sapiens OX=9606 GN=GP5 PE=1 SV=1	sp|P40197|GPV_HUMAN	0	323.31	sp|P40197|GPV_HUMAN	1	25	53.4	60.958	560	114990000000	3947	4999500000	1	1	12	12	12	12	24	24	48
SPN	P16150	LEUK_HUMAN	+	cellmembrane			+		+		+	6	CD43			+	+		+	+		+	+	+	+			Leukosialin OS=Homo sapiens OX=9606 GN=SPN PE=1 SV=1	sp|P16150|LEUK_HUMAN	0.00067249	12.304	sp|P16150|LEUK_HUMAN	1	4	16.5	40.321	400	444250000	45	34173000	1	1	2	2	3	5	4	8	12
CD44	P16070	CD44_HUMAN	+	cellmembrane		focal adhesion	+		+		+	7	CD44		+		+	+	+	+		+	+	+		+		CD44 antigen OS=Homo sapiens OX=9606 GN=CD44 PE=1 SV=3;Isoform 16 of CD44 antigen OS=Homo sapiens OX=9606 GN=CD44;Isoform 5 of CD44 antigen OS=Homo sapiens OX=9606 GN=CD44;Isoform 7 of CD44 antigen OS=Homo sapiens OX=9606 GN=CD44;Isoform 3 of CD44 antigen	sp|P16070|CD44_HUMAN;sp|P16070-16|CD44_HUMAN;sp|P16070-5|CD44_HUMAN;sp|P16070-7|CD44_HUMAN;sp|P16070-3|CD44_HUMAN;sp|P16070-4|CD44_HUMAN;sp|P16070-6|CD44_HUMAN;sp|P16070-17|CD44_HUMAN;sp|P16070-8|CD44_HUMAN;sp|P16070-10|CD44_HUMAN;sp|P16070-11|CD44_HUMAN;sp|P16070-13|CD44_HUMAN;sp|P16070-14|CD44_HUMAN;sp|P16070-12|CD44_HUMAN;sp|P16070-18|CD44_HUMAN;sp|P16070-15|CD44_HUMAN;sp|P16070-9|CD44_HUMAN	0.0012323	8.8175	sp|P16070|CD44_HUMAN;sp|P16070-16|CD44_HUMAN;sp|P16070-5|CD44_HUMAN;sp|P16070-7|CD44_HUMAN;sp|P16070-3|CD44_HUMAN;sp|P16070-4|CD44_HUMAN;sp|P16070-6|CD44_HUMAN;sp|P16070-17|CD44_HUMAN;sp|P16070-8|CD44_HUMAN;sp|P16070-10|CD44_HUMAN;sp|P16070-11|CD44_HUMAN;sp|P16070-13|CD44_HUMAN;sp|P16070-14|CD44_HUMAN;sp|P16070-12|CD44_HUMAN;sp|P16070-18|CD44_HUMAN;sp|P16070-15|CD44_HUMAN;sp|P16070-9|CD44_HUMAN;s…	18	5	8.1	81.537	742	1254100000	235	46448000	1	1	10	10	8	9	20	17	37
CD46	P15529-16	MCP_HUMAN	+	cellmembrane		focal adhesion	+		+		+	7	CD46		+		+	+	+	+		+	+	+	+			Isoform 3 of Membrane cofactor protein OS=Homo sapiens OX=9606 GN=CD46;Isoform L of Membrane cofactor protein OS=Homo sapiens OX=9606 GN=CD46;Isoform F of Membrane cofactor protein OS=Homo sapiens OX=9606 GN=CD46;Isoform J of Membrane cofactor protein OS=H	sp|P15529-16|MCP_HUMAN;sp|P15529-7|MCP_HUMAN;sp|P15529-4|MCP_HUMAN;sp|P15529-6|MCP_HUMAN;sp|P15529-3|MCP_HUMAN;sp|P15529-5|MCP_HUMAN;sp|P15529-2|MCP_HUMAN;sp|P15529-15|MCP_HUMAN;sp|P15529-9|MCP_HUMAN;sp|P15529-12|MCP_HUMAN;sp|P15529-14|MCP_HUMAN;sp|P15529-8|MCP_HUMAN;sp|P15529-11|MCP_HUMAN;sp|P15529-13|MCP_HUMAN;sp|P15529-10|MCP_HUMAN;sp|P15529|MCP_HUMAN	0.00064392	10.229	sp|P15529-16|MCP_HUMAN;sp|P15529-7|MCP_HUMAN;sp|P15529-4|MCP_HUMAN;sp|P15529-6|MCP_HUMAN;sp|P15529-3|MCP_HUMAN;sp|P15529-5|MCP_HUMAN;sp|P15529-2|MCP_HUMAN;sp|P15529-15|MCP_HUMAN;sp|P15529-9|MCP_HUMAN;sp|P15529-12|MCP_HUMAN;sp|P15529-14|MCP_HUMAN;sp|P15529-8|MCP_HUMAN;sp|P15529-11|MCP_HUMAN;sp|P15529-13|MCP_HUMAN;sp|P15529-10|MCP_HUMAN;sp|P15529|MCP_HUMAN	16	5	14.6	36.826	336	2731300000	339	248300000	1	1	5	6	11	11	11	22	33
CD47	Q08722-2	CD47_HUMAN	+	cellmembrane			+		+		+	8	CD47		+		+	+	+	+		+	+	+	+	+		Isoform OA3-293 of Leukocyte surface antigen CD47 OS=Homo sapiens OX=9606 GN=CD47;Isoform OA3-305 of Leukocyte surface antigen CD47 OS=Homo sapiens OX=9606 GN=CD47;Isoform OA3-312 of Leukocyte surface antigen CD47 OS=Homo sapiens OX=9606 GN=CD47;Leukocyte	sp|Q08722-2|CD47_HUMAN;sp|Q08722-3|CD47_HUMAN;sp|Q08722-4|CD47_HUMAN;sp|Q08722|CD47_HUMAN	0	37.35	sp|Q08722-2|CD47_HUMAN;sp|Q08722-3|CD47_HUMAN;sp|Q08722-4|CD47_HUMAN;sp|Q08722|CD47_HUMAN	4	8	25.7	31.742	292	33383000000	718	4172900000	1	1	12	12	12	12	24	24	48
ITGA2	P17301	ITA2_HUMAN	+	cellmembrane		focal adhesion					+	7	CD49b		+	+	+	+	+	+		+		+	+			Integrin alpha-2 OS=Homo sapiens OX=9606 GN=ITGA2 PE=1 SV=1	sp|P17301|ITA2_HUMAN	0	323.31	sp|P17301|ITA2_HUMAN	1	47	47.9	129.29	1181	47746000000	3573	1061000000	1	1	11	10	12	11	21	23	44
ITGA5	P08648	ITA5_HUMAN	+	cellmembrane		Cell junction					+	7	CD49e		+	+	+		+	+	+	+		+		+		Integrin alpha-5 OS=Homo sapiens OX=9606 GN=ITGA5 PE=1 SV=2	sp|P08648|ITA5_HUMAN	0	323.31	sp|P08648|ITA5_HUMAN	1	18	30	114.54	1049	7448800000	712	212820000	1	1	7	7	11	11	14	22	36
ITGA6	P23229-4	ITA6_HUMAN	+	cellmembrane		focal adhesion					+	5	CD49f		+	+	+			+		+		+	+			Isoform Alpha-6X2A of Integrin alpha-6 OS=Homo sapiens OX=9606 GN=ITGA6;Isoform Alpha-6X1A of Integrin alpha-6 OS=Homo sapiens OX=9606 GN=ITGA6;Isoform Alpha-6X2B of Integrin alpha-6 OS=Homo sapiens OX=9606 GN=ITGA6;Isoform Alpha-6X1B of Integrin alpha-6 O	sp|P23229-4|ITA6_HUMAN;sp|P23229-2|ITA6_HUMAN;sp|P23229-5|ITA6_HUMAN;sp|P23229-3|ITA6_HUMAN;sp|P23229-9|ITA6_HUMAN;sp|P23229-6|ITA6_HUMAN;sp|P23229|ITA6_HUMAN	0	323.31	sp|P23229-4|ITA6_HUMAN;sp|P23229-2|ITA6_HUMAN;sp|P23229-5|ITA6_HUMAN;sp|P23229-3|ITA6_HUMAN;sp|P23229-9|ITA6_HUMAN;sp|P23229-6|ITA6_HUMAN;sp|P23229|ITA6_HUMAN	7	85	64.2	119.09	1068	324550000000	9821	5500900000	1	1	12	12	12	12	24	24	48
ICAM3	P32942	ICAM3_HUMAN	+	cellmembrane			+		+			7	CD50		+	+	+	+	+	+		+	+	+				Intercellular adhesion molecule 3 OS=Homo sapiens OX=9606 GN=ICAM3 PE=1 SV=2	sp|P32942|ICAM3_HUMAN	0.0015369	3.764	sp|P32942|ICAM3_HUMAN	1	3	7.9	59.54	547	35737000	12	1429500	1	0	1	2	0	0	3	0	3
ITGAV	P06756-3	ITAV_HUMAN	+	cellmembrane		Cell junction	+		+		+	3	CD51		+							+		+	+			Isoform 3 of Integrin alpha-V OS=Homo sapiens OX=9606 GN=ITGAV;Integrin alpha-V OS=Homo sapiens OX=9606 GN=ITGAV PE=1 SV=2;Isoform 2 of Integrin alpha-V OS=Homo sapiens OX=9606 GN=ITGAV	sp|P06756-3|ITAV_HUMAN;sp|P06756|ITAV_HUMAN;sp|P06756-2|ITAV_HUMAN	0	52.673	sp|P06756-3|ITAV_HUMAN;sp|P06756|ITAV_HUMAN;sp|P06756-2|ITAV_HUMAN	3	21	32.4	111.13	1002	1447900000	204	24965000	1	1	3	4	10	10	7	20	27
ICAM1	P05362	ICAM1_HUMAN	+	cellmembrane		focal adhesion	+		+			4	CD54		+		+	+		+		+		+				Intercellular adhesion molecule 1 OS=Homo sapiens OX=9606 GN=ICAM1 PE=1 SV=2	sp|P05362|ICAM1_HUMAN	0.0019249	2.6125	sp|P05362|ICAM1_HUMAN	1	2	5.6	57.825	532	13740000	16	624530	1	0	1	2	0	0	3	0	3
CD55	P08174-2	DAF_HUMAN	+	cellmembrane			+		+		+	9	CD55		+	+	+	+	+	+		+	+	+	+	+		Isoform 1 of Complement decay-accelerating factor OS=Homo sapiens OX=9606 GN=CD55;Isoform 4 of Complement decay-accelerating factor OS=Homo sapiens OX=9606 GN=CD55;Complement decay-accelerating factor OS=Homo sapiens OX=9606 GN=CD55 PE=1 SV=4;Isoform 3 of	sp|P08174-2|DAF_HUMAN;sp|P08174-4|DAF_HUMAN;sp|P08174|DAF_HUMAN;sp|P08174-3|DAF_HUMAN;sp|P08174-5|DAF_HUMAN	0	103.72	sp|P08174-2|DAF_HUMAN;sp|P08174-4|DAF_HUMAN;sp|P08174|DAF_HUMAN;sp|P08174-3|DAF_HUMAN;sp|P08174-5|DAF_HUMAN	5	14	40.7	48.717	440	21404000000	1199	856160000	1	1	11	11	12	12	22	24	46
CD69	Q07108	CD69_HUMAN	+	cellmembrane							+	6	CD69				+	+	+	+		+	+	+	+			Early activation antigen CD69 OS=Homo sapiens OX=9606 GN=CD69 PE=1 SV=1	sp|Q07108|CD69_HUMAN	0	22.154	sp|Q07108|CD69_HUMAN	1	5	26.6	22.559	199	931110000	85	133020000	1	1	1	1	10	9	2	19	21
CD84	Q9UIB8-3	SLAF5_HUMAN	+	cellmembrane							+	6	CD84				+	+	+	+	+	+		+	+			Isoform 3 of SLAM family member 5 OS=Homo sapiens OX=9606 GN=CD84;Isoform 2 of SLAM family member 5 OS=Homo sapiens OX=9606 GN=CD84;SLAM family member 5 OS=Homo sapiens OX=9606 GN=CD84 PE=1 SV=1;Isoform 5 of SLAM family member 5 OS=Homo sapiens OX=9606 GN=	sp|Q9UIB8-3|SLAF5_HUMAN;sp|Q9UIB8-2|SLAF5_HUMAN;sp|Q9UIB8|SLAF5_HUMAN;sp|Q9UIB8-5|SLAF5_HUMAN;sp|Q9UIB8-4|SLAF5_HUMAN	0	58.279	sp|Q9UIB8-3|SLAF5_HUMAN;sp|Q9UIB8-2|SLAF5_HUMAN;sp|Q9UIB8|SLAF5_HUMAN;sp|Q9UIB8-5|SLAF5_HUMAN;sp|Q9UIB8-4|SLAF5_HUMAN;sp|Q9UIB8-7|SLAF5_HUMAN	6	13	35.4	36.87	328	12018000000	592	751140000	1	1	10	10	12	12	20	24	44
SLC3A2	P08195-2	4F2_HUMAN	+	cellmembrane		Cell junction	+		+		+	7	CD98		+		+	+	+	+		+	+	+	+			Isoform 2 of 4F2 cell-surface antigen heavy chain OS=Homo sapiens OX=9606 GN=SLC3A2;Isoform 3 of 4F2 cell-surface antigen heavy chain OS=Homo sapiens OX=9606 GN=SLC3A2;4F2 cell-surface antigen heavy chain OS=Homo sapiens OX=9606 GN=SLC3A2 PE=1 SV=3;Isoform	sp|P08195-2|4F2_HUMAN;sp|P08195-3|4F2_HUMAN;sp|P08195|4F2_HUMAN;sp|P08195-4|4F2_HUMAN	0	57.281	sp|P08195-2|4F2_HUMAN;sp|P08195-3|4F2_HUMAN;sp|P08195|4F2_HUMAN;sp|P08195-4|4F2_HUMAN	4	15	43.5	57.944	529	1556400000	213	55585000	1	1	5	3	9	9	8	18	26
CD99	P14209	CD99_HUMAN	+	cellmembrane		focal adhesion					+	8	CD99		+	+	+	+	+	+		+		+	+	+		CD99 antigen OS=Homo sapiens OX=9606 GN=CD99 PE=1 SV=1;Isoform 3 of CD99 antigen OS=Homo sapiens OX=9606 GN=CD99;Isoform II of CD99 antigen OS=Homo sapiens OX=9606 GN=CD99	sp|P14209|CD99_HUMAN;sp|P14209-3|CD99_HUMAN;sp|P14209-2|CD99_HUMAN	0	209.7	sp|P14209|CD99_HUMAN;sp|P14209-3|CD99_HUMAN;sp|P14209-2|CD99_HUMAN	3	6	29.7	18.848	185	2328200000	394	582040000	1	1	10	10	10	12	20	22	42
TSPAN14	Q8NG11	TSN14_HUMAN	+	cellmembrane							+		TSPAN14															Tetraspanin-14 OS=Homo sapiens OX=9606 GN=TSPAN14 PE=1 SV=1;Isoform 3 of Tetraspanin-14 OS=Homo sapiens OX=9606 GN=TSPAN14	sp|Q8NG11|TSN14_HUMAN;sp|Q8NG11-3|TSN14_HUMAN	0	19.955	sp|Q8NG11|TSN14_HUMAN;sp|Q8NG11-3|TSN14_HUMAN	2	6	22.6	30.69	270	6626800000	356	552230000	1	1	11	11	11	11	22	22	44
TSPAN15	O95858	TSN15_HUMAN	+	cellmembrane							+		TSPAN15															Tetraspanin-15 OS=Homo sapiens OX=9606 GN=TSPAN15 PE=1 SV=1	sp|O95858|TSN15_HUMAN	0	27.794	sp|O95858|TSN15_HUMAN	1	6	22.4	33.165	294	1553900000	184	155390000	1	1	1	2	10	10	3	20	23
TSPAN32	Q96QS1-2	TSN32_HUMAN	+	cellmembrane							+		TSPAN32															Isoform 2 of Tetraspanin-32 OS=Homo sapiens OX=9606 GN=TSPAN32;Tetraspanin-32 OS=Homo sapiens OX=9606 GN=TSPAN32 PE=2 SV=1;Isoform 3 of Tetraspanin-32 OS=Homo sapiens OX=9606 GN=TSPAN32;Isoform 5 of Tetraspanin-32 OS=Homo sapiens OX=9606 GN=TSPAN32	sp|Q96QS1-2|TSN32_HUMAN;sp|Q96QS1|TSN32_HUMAN;sp|Q96QS1-3|TSN32_HUMAN;sp|Q96QS1-5|TSN32_HUMAN	0	17.628	sp|Q96QS1-2|TSN32_HUMAN;sp|Q96QS1|TSN32_HUMAN;sp|Q96QS1-3|TSN32_HUMAN;sp|Q96QS1-5|TSN32_HUMAN	4	6	25.5	31.308	290	4823500000	251	401960000	1	1	3	4	10	10	7	20	27
TSPAN33	Q86UF1	TSN33_HUMAN	+	cellmembrane		Cell junction					+		TSPAN33															Tetraspanin-33 OS=Homo sapiens OX=9606 GN=TSPAN33 PE=1 SV=1	sp|Q86UF1|TSN33_HUMAN	0	28.355	sp|Q86UF1|TSN33_HUMAN	1	6	25.8	31.538	283	2153900000	213	269240000	1	1	2	3	9	10	5	19	24
TSPAN9	O75954	TSN9_HUMAN	+	cellmembrane		focal adhesion					+		TSPAN9															Tetraspanin-9 OS=Homo sapiens OX=9606 GN=TSPAN9 PE=1 SV=1	sp|O75954|TSN9_HUMAN	0	166.85	sp|O75954|TSN9_HUMAN	1	4	21.3	26.779	239	12396000000	718	1377400000	1	1	11	11	12	11	22	23	45
IGLV4-69	A0A075B6H9	LV469_HUMAN	+	serum/plasma	IG																							Immunoglobulin lambda variable 4-69 OS=Homo sapiens OX=9606 GN=IGLV4-69 PE=1 SV=1	sp|A0A075B6H9|LV469_HUMAN	0	42.974	sp|A0A075B6H9|LV469_HUMAN	1	5	43.7	12.773	119	3189500000	132	637890000	1	1	5	5	7	7	10	14	24
IGLV8-61	A0A075B6I0	LV861_HUMAN	+	serum/plasma	IG																							Immunoglobulin lambda variable 8-61 OS=Homo sapiens OX=9606 GN=IGLV8-61 PE=3 SV=7	sp|A0A075B6I0|LV861_HUMAN	0.0017251	6.376	sp|A0A075B6I0|LV861_HUMAN	1	3	20.5	12.814	122	2578700000	104	644670000	1	1	8	6	7	8	14	15	29
IGLV4-60	A0A075B6I1	LV460_HUMAN	+	serum/plasma	IG																							Immunoglobulin lambda variable 4-60 OS=Homo sapiens OX=9606 GN=IGLV4-60 PE=3 SV=1	sp|A0A075B6I1|LV460_HUMAN	0	98.935	sp|A0A075B6I1|LV460_HUMAN	1	4	46.7	12.987	120	2785900000	67	557180000	1	1	2	2	1	1	4	2	6
IGLV3-10	A0A075B6K4	LV310_HUMAN	+	serum/plasma	IG																							Immunoglobulin lambda variable 3-10 OS=Homo sapiens OX=9606 GN=IGLV3-10 PE=3 SV=2	sp|A0A075B6K4|LV310_HUMAN	0	27.359	sp|A0A075B6K4|LV310_HUMAN	1	7	35.7	12.441	115	22062000000	620	5515500000	1	1	11	11	12	12	22	24	46
IGKV2D-29	A0A075B6S2	KVD29_HUMAN	+	serum/plasma	IG																							Immunoglobulin kappa variable 2D-29 OS=Homo sapiens OX=9606 GN=IGKV2D-29 PE=3 SV=1;Immunoglobulin kappa variable 2D-26 OS=Homo sapiens OX=9606 GN=IGKV2D-26 PE=3 SV=1	sp|A0A075B6S2|KVD29_HUMAN;sp|A0A0A0MRZ7|KVD26_HUMAN	0.00063898	9.948	sp|A0A075B6S2|KVD29_HUMAN;sp|A0A0A0MRZ7|KVD26_HUMAN	2	3	45.8	13.143	120	404680000	42	80937000	1	1	0	1	2	3	1	5	6
IGKV1-27	A0A075B6S5	KV127_HUMAN	+	serum/plasma	IG																							Immunoglobulin kappa variable 1-27 OS=Homo sapiens OX=9606 GN=IGKV1-27 PE=3 SV=1	sp|A0A075B6S5|KV127_HUMAN	0	84.85	sp|A0A075B6S5|KV127_HUMAN	1	4	72.6	12.711	117	10351000000	541	2070200000	1	1	12	12	12	12	24	24	48
IGKV2D-30	A0A075B6S6	KVD30_HUMAN	+	serum/plasma	IG																							Immunoglobulin kappa variable 2D-30 OS=Homo sapiens OX=9606 GN=IGKV2D-30 PE=3 SV=1	sp|A0A075B6S6|KVD30_HUMAN	0.0015617	4.0948	sp|A0A075B6S6|KVD30_HUMAN	1	2	41.7	13.215	120	43180000	7	10795000	1	0	1	1	0	0	2	0	2
IGKV3D-15	A0A087WSY6	KVD15_HUMAN	+	serum/plasma	IG																							Immunoglobulin kappa variable 3D-15 OS=Homo sapiens OX=9606 GN=IGKV3D-15 PE=3 SV=6	sp|A0A087WSY6|KVD15_HUMAN	0	111.63	sp|A0A087WSY6|KVD15_HUMAN	1	2	26.1	12.534	115	12972000000	333	4324000000	1	1	12	12	12	12	24	24	48
IGHV3-49	A0A0A0MS15	HV349_HUMAN	+	serum/plasma	IG																							Immunoglobulin heavy variable 3-49 OS=Homo sapiens OX=9606 GN=IGHV3-49 PE=3 SV=1	sp|A0A0A0MS15|HV349_HUMAN	0	20.376	sp|A0A0A0MS15|HV349_HUMAN	1	5	48.7	13.056	119	2028700000	175	289820000	1	1	9	9	5	7	18	12	30
IGHV6-1	A0A0B4J1U7	HV601_HUMAN	+	serum/plasma	IG																							Immunoglobulin heavy variable 6-1 OS=Homo sapiens OX=9606 GN=IGHV6-1 PE=3 SV=1	sp|A0A0B4J1U7|HV601_HUMAN	0	32.518	sp|A0A0B4J1U7|HV601_HUMAN	1	5	41.3	13.481	121	3527500000	152	881870000	1	1	4	3	9	10	7	19	26
IGHV3-15	A0A0B4J1V0	HV315_HUMAN	+	serum/plasma	IG																							Immunoglobulin heavy variable 3-15 OS=Homo sapiens OX=9606 GN=IGHV3-15 PE=3 SV=1	sp|A0A0B4J1V0|HV315_HUMAN	0	95.938	sp|A0A0B4J1V0|HV315_HUMAN	1	11	58.8	12.926	119	15780000000	692	2254300000	1	1	12	12	12	12	24	24	48
IGHV3-21	A0A0B4J1V1	HV321_HUMAN	+	serum/plasma	IG																							Immunoglobulin heavy variable 3-21 OS=Homo sapiens OX=9606 GN=IGHV3-21 PE=1 SV=1	sp|A0A0B4J1V1|HV321_HUMAN	0	41.793	sp|A0A0B4J1V1|HV321_HUMAN	1	2	61.5	12.839	117	35867000	12	8966800	1	0	2	2	0	0	4	0	4
IGHV3-74	A0A0B4J1X5	HV374_HUMAN	+	serum/plasma	IG																							Immunoglobulin heavy variable 3-74 OS=Homo sapiens OX=9606 GN=IGHV3-74 PE=3 SV=1	sp|A0A0B4J1X5|HV374_HUMAN	0	29.681	sp|A0A0B4J1X5|HV374_HUMAN	1	4	63.2	12.839	117	5896000000	226	842280000	1	1	10	10	8	11	20	19	39
IGLV9-49	A0A0B4J1Y8	LV949_HUMAN	+	serum/plasma	IG																							Immunoglobulin lambda variable 9-49 OS=Homo sapiens OX=9606 GN=IGLV9-49 PE=1 SV=1	sp|A0A0B4J1Y8|LV949_HUMAN	0.00064226	10.103	sp|A0A0B4J1Y8|LV949_HUMAN	1	7	51.2	13.024	123	1597900000	61	319570000	1	1	1	1	1	1	2	2	4
IGHV3-72	A0A0B4J1Y9	HV372_HUMAN	+	serum/plasma	IG																							Immunoglobulin heavy variable 3-72 OS=Homo sapiens OX=9606 GN=IGHV3-72 PE=3 SV=1	sp|A0A0B4J1Y9|HV372_HUMAN	0	77.314	sp|A0A0B4J1Y9|HV372_HUMAN	1	7	64.7	13.203	119	2631200000	200	526240000	1	1	10	9	8	8	19	16	35
IGKV6-21	A0A0C4DH24	KV621_HUMAN	+	serum/plasma	IG																							Immunoglobulin kappa variable 6-21 OS=Homo sapiens OX=9606 GN=IGKV6-21 PE=3 SV=1	sp|A0A0C4DH24|KV621_HUMAN	0	187.79	sp|A0A0C4DH24|KV621_HUMAN	1	3	45.6	12.43	114	14273000000	127	3568300000	1	1	2	3	2	3	5	5	10
IGHV1-3	A0A0C4DH29	HV103_HUMAN	+	serum/plasma	IG						+																	Immunoglobulin heavy variable 1-3 OS=Homo sapiens OX=9606 GN=IGHV1-3 PE=3 SV=1	sp|A0A0C4DH29|HV103_HUMAN	0.0017192	6.3016	sp|A0A0C4DH29|HV103_HUMAN	1	2	35	13.008	117	496540000	38	82757000	1	1	3	3	2	2	6	4	10
IGHV1-18	A0A0C4DH31	HV118_HUMAN	+	serum/plasma	IG																							Immunoglobulin heavy variable 1-18 OS=Homo sapiens OX=9606 GN=IGHV1-18 PE=3 SV=1	sp|A0A0C4DH31|HV118_HUMAN	0	35.353	sp|A0A0C4DH31|HV118_HUMAN	1	3	39.3	12.82	117	1435400000	116	287080000	1	1	3	3	11	11	6	22	28
IGHV3-20	A0A0C4DH32	HV320_HUMAN	+	serum/plasma	IG						+																	Immunoglobulin heavy variable 3-20 OS=Homo sapiens OX=9606 GN=IGHV3-20 PE=3 SV=2	sp|A0A0C4DH32|HV320_HUMAN	0	24.004	sp|A0A0C4DH32|HV320_HUMAN	1	2	42.7	12.673	117	336010000	29	56002000	1	1	2	1	2	2	3	4	7
IGHV1-24	A0A0C4DH33	HV124_HUMAN	+	serum/plasma	IG																							Immunoglobulin heavy variable 1-24 OS=Homo sapiens OX=9606 GN=IGHV1-24 PE=3 SV=1;Immunoglobulin heavy variable 1-69-2 OS=Homo sapiens OX=9606 GN=IGHV1-69-2 PE=3 SV=2	sp|A0A0C4DH33|HV124_HUMAN;sp|A0A0G2JMI3|HV692_HUMAN	0	136.66	sp|A0A0C4DH33|HV124_HUMAN;sp|A0A0G2JMI3|HV692_HUMAN	2	2	26.5	12.824	117	255430000	16	42571000	1	1	1	1	1	1	2	2	4
IGHV4-28	A0A0C4DH34	HV428_HUMAN	+	serum/plasma	IG																							Immunoglobulin heavy variable 4-28 OS=Homo sapiens OX=9606 GN=IGHV4-28 PE=3 SV=1	sp|A0A0C4DH34|HV428_HUMAN	0	106.07	sp|A0A0C4DH34|HV428_HUMAN	1	4	28.2	13.124	117	1182100000	66	295520000	1	1	2	2	5	6	4	11	15
IGHV5-51	A0A0C4DH38	HV551_HUMAN	+	serum/plasma	IG																							Immunoglobulin heavy variable 5-51 OS=Homo sapiens OX=9606 GN=IGHV5-51 PE=3 SV=1	sp|A0A0C4DH38|HV551_HUMAN	0	98.251	sp|A0A0C4DH38|HV551_HUMAN	1	5	59.8	12.674	117	151540000000	704	25257000000	1	1	12	12	12	12	24	24	48
IGHV2-70D	A0A0C4DH43	HV70D_HUMAN	+	serum/plasma	IG																							Immunoglobulin heavy variable 2-70D OS=Homo sapiens OX=9606 GN=IGHV2-70D PE=3 SV=1	sp|A0A0C4DH43|HV70D_HUMAN	0	22.039	sp|A0A0C4DH43|HV70D_HUMAN;sp|P01814|HV270_HUMAN	2	4	64.7	13.312	119	485640000	18	80940000	1	0	2	2	0	0	4	0	4
IGKV1-8	A0A0C4DH67	KV108_HUMAN	+	serum/plasma	IG																							Immunoglobulin kappa variable 1-8 OS=Homo sapiens OX=9606 GN=IGKV1-8 PE=3 SV=1;Immunoglobulin kappa variable 1-9 OS=Homo sapiens OX=9606 GN=IGKV1-9 PE=3 SV=1	sp|A0A0C4DH67|KV108_HUMAN;sp|A0A0C4DH69|KV109_HUMAN	0.0012092	7.9293	sp|A0A0C4DH67|KV108_HUMAN;sp|A0A0C4DH69|KV109_HUMAN	2	3	45.2	12.537	115	996540000	80	249130000	1	1	6	5	5	3	11	8	19
IGKV2-24	A0A0C4DH68	KV224_HUMAN	+	serum/plasma	IG																							Immunoglobulin kappa variable 2-24 OS=Homo sapiens OX=9606 GN=IGKV2-24 PE=3 SV=1	sp|A0A0C4DH68|KV224_HUMAN	0	16.009	sp|A0A0C4DH68|KV224_HUMAN	1	4	41.7	13.079	120	10682000000	394	2670400000	1	1	11	11	11	11	22	22	44
IGHV7-4-1	A0A0J9YVY3	HV741_HUMAN	+	serum/plasma	IG																							Immunoglobulin heavy variable 7-4-1 OS=Homo sapiens OX=9606 GN=IGHV7-4-1 PE=3 SV=1	sp|A0A0J9YVY3|HV741_HUMAN	0.0042776	2.4018	sp|A0A0J9YVY3|HV741_HUMAN	1	2	43.6	12.848	117	511320000	10	85220000	0	1	0	0	0	1	0	1	1
IGHV3-64D	A0A0J9YX35	HV64D_HUMAN	+	serum/plasma	IG																							Immunoglobulin heavy variable 3-64D OS=Homo sapiens OX=9606 GN=IGHV3-64D PE=3 SV=1	sp|A0A0J9YX35|HV64D_HUMAN	0	69.926	sp|A0A0J9YX35|HV64D_HUMAN	1	5	63.2	12.822	117	1785900000	75	297650000	1	1	6	5	5	6	11	11	22
IGHV5-10-1	A0A0J9YXX1	HV5X1_HUMAN	+	serum/plasma	IG																							Immunoglobulin heavy variable 5-10-1 OS=Homo sapiens OX=9606 GN=IGHV5-10-1 PE=3 SV=1	sp|A0A0J9YXX1|HV5X1_HUMAN	0.0073428	1.9954	sp|A0A0J9YXX1|HV5X1_HUMAN	1	2	30.8	12.772	117	142360000000	142	23727000000	1	1	5	4	4	5	9	9	18
C3orf85	A0A1B0GTC6	CC085_HUMAN	+	unknown																								Uncharacterized protein C3orf85 OS=Homo sapiens OX=9606 GN=C3orf85 PE=3 SV=1	sp|A0A1B0GTC6|CC085_HUMAN	0	22.159	sp|A0A1B0GTC6|CC085_HUMAN	1	2	47.8	10.386	90	1520900000	173	380220000	1	1	11	11	3	3	22	6	28
ESYT2	A0FGR8-2	ESYT2_HUMAN	+	cellmembrane							+																	Isoform 2 of Extended synaptotagmin-2 OS=Homo sapiens OX=9606 GN=ESYT2;Extended synaptotagmin-2 OS=Homo sapiens OX=9606 GN=ESYT2 PE=1 SV=1;Isoform 6 of Extended synaptotagmin-2 OS=Homo sapiens OX=9606 GN=ESYT2;Isoform 4 of Extended synaptotagmin-2 OS=Homo	sp|A0FGR8-2|ESYT2_HUMAN;sp|A0FGR8|ESYT2_HUMAN;sp|A0FGR8-6|ESYT2_HUMAN;sp|A0FGR8-4|ESYT2_HUMAN	0	63.329	sp|A0FGR8-2|ESYT2_HUMAN;sp|A0FGR8|ESYT2_HUMAN;sp|A0FGR8-6|ESYT2_HUMAN;sp|A0FGR8-4|ESYT2_HUMAN;sp|A0FGR8-5|ESYT2_HUMAN	5	27	37.8	98.9	893	6533400000	681	155560000	1	1	6	6	12	11	12	23	35
IGLC7	A0M8Q6	IGLC7_HUMAN	+	serum/plasma	IG																							Immunoglobulin lambda constant 7 OS=Homo sapiens OX=9606 GN=IGLC7 PE=1 SV=3	sp|A0M8Q6|IGLC7_HUMAN	0.00063091	9.5571	sp|A0M8Q6|IGLC7_HUMAN	1	4	92.5	11.253	106	173970000	32	24853000	1	1	1	1	1	2	2	3	5
ILVBL	A1L0T0	ILVBL_HUMAN	+	cellmembrane							+																	Acetolactate synthase-like protein OS=Homo sapiens OX=9606 GN=ILVBL PE=1 SV=2	sp|A1L0T0|ILVBL_HUMAN	0	45.561	sp|A1L0T0|ILVBL_HUMAN	1	9	34.2	67.867	632	1387000000	171	55478000	1	1	1	1	11	11	2	22	24
ELOVL7	A1L3X0	ELOV7_HUMAN	+	cellmembrane							+																	Elongation of very long chain fatty acids protein 7 OS=Homo sapiens OX=9606 GN=ELOVL7 PE=1 SV=1	sp|A1L3X0|ELOV7_HUMAN	0.0042735	2.3972	sp|A1L3X0|ELOV7_HUMAN	1	2	6.4	33.356	281	767150000	97	85239000	1	1	1	2	11	11	3	22	25
DENND3	A2RUS2	DEND3_HUMAN	+	cellpart		Endosome					+																	DENN domain-containing protein 3 OS=Homo sapiens OX=9606 GN=DENND3 PE=1 SV=2;Isoform 2 of DENN domain-containing protein 3 OS=Homo sapiens OX=9606 GN=DENND3	sp|A2RUS2|DEND3_HUMAN;sp|A2RUS2-2|DEND3_HUMAN	0.0019569	2.8732	sp|A2RUS2|DEND3_HUMAN;sp|A2RUS2-2|DEND3_HUMAN;sp|A2RUS2-4|DEND3_HUMAN	3	3	4.3	135.89	1198	46457000	5	749310	0	0	0	0	0	0	0	0	0
KRT87P	A6NCN2	KT81L_HUMAN	+	cellsurface																							+	;Putative keratin-87 protein OS=Homo sapiens OX=9606 GN=KRT87P PE=5 SV=4	CON__sp|A6NCN2|KT81L_HUMAN;sp|A6NCN2|KR87P_HUMAN	0	217.5	CON__sp|A6NCN2|KT81L_HUMAN;sp|A6NCN2|KR87P_HUMAN	2	6	50.2	53.409	486	1390100000	26	47933000	0	0	0	0	0	0	0	0	0
MFSD2B	A6NFX1	MFS2B_HUMAN	+	cellmembrane							+																	Major facilitator superfamily domain-containing protein 2B OS=Homo sapiens OX=9606 GN=MFSD2B PE=1 SV=4	sp|A6NFX1|MFS2B_HUMAN	0	13.261	sp|A6NFX1|MFS2B_HUMAN	1	3	5.8	53.742	504	424720000	117	38611000	0	1	0	0	10	10	0	20	20
TUBAL3	A6NHL2-2	TBAL3_HUMAN	+	cellpart							+																	Isoform 2 of Tubulin alpha chain-like 3 OS=Homo sapiens OX=9606 GN=TUBAL3;Tubulin alpha chain-like 3 OS=Homo sapiens OX=9606 GN=TUBAL3 PE=1 SV=2	sp|A6NHL2-2|TBAL3_HUMAN;sp|A6NHL2|TBAL3_HUMAN	0	82.042	sp|A6NHL2-2|TBAL3_HUMAN;sp|A6NHL2|TBAL3_HUMAN	2	2	15	45.517	406	27136000000	388	1085400000	1	1	12	12	12	12	24	24	48
COL6A6	A6NMZ7	CO6A6_HUMAN	+	cellsurface																								Collagen alpha-6(VI) chain OS=Homo sapiens OX=9606 GN=COL6A6 PE=1 SV=2;Isoform 2 of Collagen alpha-6(VI) chain OS=Homo sapiens OX=9606 GN=COL6A6	sp|A6NMZ7|CO6A6_HUMAN;sp|A6NMZ7-2|CO6A6_HUMAN	0.0014757	2.9417	sp|A6NMZ7|CO6A6_HUMAN;sp|A6NMZ7-2|CO6A6_HUMAN	2	6	5.3	247.17	2263	19326000000	228	174110000	1	1	11	11	12	12	22	24	46
BTBD11	A6QL63-2	BTBDB_HUMAN	+	cellmembrane							+																	Isoform 2 of Ankyrin repeat and BTB/POZ domain-containing protein BTBD11 OS=Homo sapiens OX=9606 GN=BTBD11;Ankyrin repeat and BTB/POZ domain-containing protein BTBD11 OS=Homo sapiens OX=9606 GN=BTBD11 PE=2 SV=3;Isoform 4 of Ankyrin repeat and BTB/POZ domai	sp|A6QL63-2|BTBDB_HUMAN;sp|A6QL63|BTBDB_HUMAN;sp|A6QL63-4|BTBDB_HUMAN;sp|A6QL63-5|BTBDB_HUMAN;sp|A6QL63-3|BTBDB_HUMAN	0	17.842	sp|A6QL63-2|BTBDB_HUMAN;sp|A6QL63|BTBDB_HUMAN;sp|A6QL63-4|BTBDB_HUMAN;sp|A6QL63-5|BTBDB_HUMAN;sp|A6QL63-3|BTBDB_HUMAN	5	4	7.4	107.87	985	174200000	79	4051100	1	1	0	1	5	5	1	10	11
ZNF839	A8K0R7-5	ZN839_HUMAN	+	unknown																								Isoform 3 of Zinc finger protein 839 OS=Homo sapiens OX=9606 GN=ZNF839	sp|A8K0R7-5|ZN839_HUMAN	0.0099099	1.7878	sp|A8K0R7-5|ZN839_HUMAN	1	2	6.6	99.443	927	3007700000	30	79149000	1	1	3	3	1	1	6	2	8
MYO1G	B0I1T2	MYO1G_HUMAN	+	cellmembrane			+		+		+																	Unconventional myosin-Ig OS=Homo sapiens OX=9606 GN=MYO1G PE=1 SV=2;Isoform 4 of Unconventional myosin-Ig OS=Homo sapiens OX=9606 GN=MYO1G	sp|B0I1T2|MYO1G_HUMAN;sp|B0I1T2-4|MYO1G_HUMAN	0.0016988	6.023	sp|B0I1T2|MYO1G_HUMAN;sp|B0I1T2-4|MYO1G_HUMAN;sp|B0I1T2-3|MYO1G_HUMAN	3	7	12	116.44	1018	137080000	55	2586500	1	1	4	6	4	5	10	9	19
SMIM1	B2RUZ4	SMIM1_HUMAN	+	cellmembrane																								Small integral membrane protein 1 OS=Homo sapiens OX=9606 GN=SMIM1 PE=1 SV=1	sp|B2RUZ4|SMIM1_HUMAN	0	28.401	sp|B2RUZ4|SMIM1_HUMAN	1	3	43.6	8.749	78	6527800000	351	2175900000	1	1	11	10	11	12	21	23	44
AGPS	O00116	ADAS_HUMAN	+	cellpart							+																	Alkyldihydroxyacetonephosphate synthase, peroxisomal OS=Homo sapiens OX=9606 GN=AGPS PE=1 SV=1	sp|O00116|ADAS_HUMAN	0	46.925	sp|O00116|ADAS_HUMAN	1	25	52.3	72.911	658	4544300000	576	133660000	1	1	8	7	11	11	15	22	37
KIF2A	O00139-2	KIF2A_HUMAN	+	cellpart							+																	Isoform 2 of Kinesin-like protein KIF2A OS=Homo sapiens OX=9606 GN=KIF2A;Isoform 1 of Kinesin-like protein KIF2A OS=Homo sapiens OX=9606 GN=KIF2A;Kinesin-like protein KIF2A OS=Homo sapiens OX=9606 GN=KIF2A PE=1 SV=3	sp|O00139-2|KIF2A_HUMAN;sp|O00139-1|KIF2A_HUMAN;sp|O00139|KIF2A_HUMAN	0	256.65	sp|O00139-2|KIF2A_HUMAN;sp|O00139-1|KIF2A_HUMAN;sp|O00139|KIF2A_HUMAN	3	23	44.8	75.042	660	10804000000	989	348530000	1	1	6	6	12	12	12	24	36
PDLIM1	O00151	PDLI1_HUMAN	+	cellpart		focal adhesion					+																	PDZ and LIM domain protein 1 OS=Homo sapiens OX=9606 GN=PDLIM1 PE=1 SV=4	sp|O00151|PDLI1_HUMAN	0	323.31	sp|O00151|PDLI1_HUMAN	1	39	95.1	36.071	329	146070000000	4729	9129500000	1	1	12	12	12	12	24	24	48
MYO1C	O00159-2	MYO1C_HUMAN	+	cellmembrane			+		+		+																	Isoform 2 of Unconventional myosin-Ic OS=Homo sapiens OX=9606 GN=MYO1C;Isoform 3 of Unconventional myosin-Ic OS=Homo sapiens OX=9606 GN=MYO1C;Unconventional myosin-Ic OS=Homo sapiens OX=9606 GN=MYO1C PE=1 SV=4	sp|O00159-2|MYO1C_HUMAN;sp|O00159-3|MYO1C_HUMAN;sp|O00159|MYO1C_HUMAN	0	56.843	sp|O00159-2|MYO1C_HUMAN;sp|O00159-3|MYO1C_HUMAN;sp|O00159|MYO1C_HUMAN	3	32	40.7	117.91	1028	2937200000	407	54393000	1	1	4	6	12	12	10	24	34
SNAP23	O00161	SNP23_HUMAN	+	cellmembrane		Cell junction	+		+		+																	Synaptosomal-associated protein 23 OS=Homo sapiens OX=9606 GN=SNAP23 PE=1 SV=1;Isoform SNAP-23b of Synaptosomal-associated protein 23 OS=Homo sapiens OX=9606 GN=SNAP23	sp|O00161|SNP23_HUMAN;sp|O00161-2|SNP23_HUMAN	0	323.31	sp|O00161|SNP23_HUMAN;sp|O00161-2|SNP23_HUMAN	2	26	84.4	23.354	211	59968000000	2345	4997300000	1	1	12	12	12	12	24	24	48
STXBP3	O00186	STXB3_HUMAN	+	cellpart			+		+		+																	Syntaxin-binding protein 3 OS=Homo sapiens OX=9606 GN=STXBP3 PE=1 SV=2	sp|O00186|STXB3_HUMAN	0	91.418	sp|O00186|STXB3_HUMAN	1	24	52.2	67.764	592	5846800000	834	194890000	1	1	9	8	11	11	17	22	39
RAB27B	O00194	RB27B_HUMAN	+	cellmembrane			+		+		+																	Ras-related protein Rab-27B OS=Homo sapiens OX=9606 GN=RAB27B PE=1 SV=4	sp|O00194|RB27B_HUMAN	0	323.31	sp|O00194|RB27B_HUMAN	1	25	82.1	24.608	218	121000000000	3350	9307700000	1	1	12	12	12	12	24	24	48
NDUFS8	O00217	NDUS8_HUMAN	+	cellpart							+																	NADH dehydrogenase [ubiquinone] iron-sulfur protein 8, mitochondrial OS=Homo sapiens OX=9606 GN=NDUFS8 PE=1 SV=1	sp|O00217|NDUS8_HUMAN	0	16.624	sp|O00217|NDUS8_HUMAN	1	5	42.9	23.705	210	980610000	187	75431000	1	1	1	2	11	11	3	22	25
PSMD11	O00231	PSD11_HUMAN	+	cellpart							+																	26S proteasome non-ATPase regulatory subunit 11 OS=Homo sapiens OX=9606 GN=PSMD11 PE=1 SV=3;Isoform 2 of 26S proteasome non-ATPase regulatory subunit 11 OS=Homo sapiens OX=9606 GN=PSMD11	sp|O00231|PSD11_HUMAN;sp|O00231-2|PSD11_HUMAN	0.0011876	7.3459	sp|O00231|PSD11_HUMAN;sp|O00231-2|PSD11_HUMAN	2	7	26.1	47.463	422	163010000	12	6037600	0	1	0	0	1	2	0	3	3
PSMD12	O00232	PSD12_HUMAN	+	cellpart			+		+		+																	26S proteasome non-ATPase regulatory subunit 12 OS=Homo sapiens OX=9606 GN=PSMD12 PE=1 SV=3;Isoform 2 of 26S proteasome non-ATPase regulatory subunit 12 OS=Homo sapiens OX=9606 GN=PSMD12	sp|O00232|PSD12_HUMAN;sp|O00232-2|PSD12_HUMAN	0.0015609	4.0832	sp|O00232|PSD12_HUMAN;sp|O00232-2|PSD12_HUMAN	2	8	26.5	52.904	456	923240000	173	36930000	1	1	5	4	11	11	9	22	31
PSMD9	O00233	PSMD9_HUMAN	+	cellpart							+																	26S proteasome non-ATPase regulatory subunit 9 OS=Homo sapiens OX=9606 GN=PSMD9 PE=1 SV=3;Isoform p27-S of 26S proteasome non-ATPase regulatory subunit 9 OS=Homo sapiens OX=9606 GN=PSMD9	sp|O00233|PSMD9_HUMAN;sp|O00233-2|PSMD9_HUMAN	0.001544	3.8825	sp|O00233|PSMD9_HUMAN;sp|O00233-2|PSMD9_HUMAN;sp|O00233-3|PSMD9_HUMAN	3	3	16.6	24.682	223	146520000	42	13320000	0	1	0	0	4	4	0	8	8
PGRMC1	O00264	PGRC1_HUMAN	+	cellmembrane							+																	Membrane-associated progesterone receptor component 1 OS=Homo sapiens OX=9606 GN=PGRMC1 PE=1 SV=3	sp|O00264|PGRC1_HUMAN	0	207.09	sp|O00264|PGRC1_HUMAN;sp|O00264-2|PGRC1_HUMAN	2	13	55.4	21.671	195	36491000000	1021	4561400000	1	1	10	11	12	12	21	24	45
CLIC1	O00299	CLIC1_HUMAN	+	cellmembrane			+	+	+	+	+																	Chloride intracellular channel protein 1 OS=Homo sapiens OX=9606 GN=CLIC1 PE=1 SV=4	sp|O00299|CLIC1_HUMAN	0	323.31	sp|O00299|CLIC1_HUMAN	1	29	90.9	26.922	241	202240000000	5102	13483000000	1	1	12	12	12	12	24	24	48
QSOX1	O00391	QSOX1_HUMAN	+	cellmembrane			+		+		+																	Sulfhydryl oxidase 1 OS=Homo sapiens OX=9606 GN=QSOX1 PE=1 SV=3;Isoform 2 of Sulfhydryl oxidase 1 OS=Homo sapiens OX=9606 GN=QSOX1	sp|O00391|QSOX1_HUMAN;sp|O00391-2|QSOX1_HUMAN	0	23.224	sp|O00391|QSOX1_HUMAN;sp|O00391-2|QSOX1_HUMAN	2	18	34.8	82.577	747	1655800000	405	36796000	1	1	11	11	5	7	22	12	34
IPO5	O00410	IPO5_HUMAN	+	cellpart							+																	Importin-5 OS=Homo sapiens OX=9606 GN=IPO5 PE=1 SV=4;Isoform 3 of Importin-5 OS=Homo sapiens OX=9606 GN=IPO5;Isoform 2 of Importin-5 OS=Homo sapiens OX=9606 GN=IPO5	sp|O00410|IPO5_HUMAN;sp|O00410-3|IPO5_HUMAN;sp|O00410-2|IPO5_HUMAN	0	194.47	sp|O00410|IPO5_HUMAN;sp|O00410-3|IPO5_HUMAN;sp|O00410-2|IPO5_HUMAN	3	30	46.7	123.63	1097	4020400000	601	75857000	1	1	6	5	11	11	11	22	33
DNM1L	O00429-3	DNM1L_HUMAN	+	cellmembrane		Endosome					+																	Isoform 2 of Dynamin-1-like protein OS=Homo sapiens OX=9606 GN=DNM1L;Dynamin-1-like protein OS=Homo sapiens OX=9606 GN=DNM1L PE=1 SV=2;Isoform 3 of Dynamin-1-like protein OS=Homo sapiens OX=9606 GN=DNM1L;Isoform 5 of Dynamin-1-like protein OS=Homo sapiens	sp|O00429-3|DNM1L_HUMAN;sp|O00429|DNM1L_HUMAN;sp|O00429-4|DNM1L_HUMAN;sp|O00429-5|DNM1L_HUMAN;sp|O00429-2|DNM1L_HUMAN;sp|O00429-6|DNM1L_HUMAN;sp|O00429-8|DNM1L_HUMAN;sp|O00429-7|DNM1L_HUMAN	0	323.31	sp|O00429-3|DNM1L_HUMAN;sp|O00429|DNM1L_HUMAN;sp|O00429-4|DNM1L_HUMAN;sp|O00429-5|DNM1L_HUMAN;sp|O00429-2|DNM1L_HUMAN;sp|O00429-6|DNM1L_HUMAN;sp|O00429-8|DNM1L_HUMAN;sp|O00429-7|DNM1L_HUMAN	8	53	74.9	79.441	710	44885000000	3705	916020000	1	1	10	11	12	12	21	24	45
RTCA	O00442	RTCA_HUMAN	+	cellpart																								RNA 3-terminal phosphate cyclase OS=Homo sapiens OX=9606 GN=RTCA PE=1 SV=1;Isoform 2 of RNA 3-terminal phosphate cyclase OS=Homo sapiens OX=9606 GN=RTCA	sp|O00442|RTCA_HUMAN;sp|O00442-2|RTCA_HUMAN	0.0014829	3.0852	sp|O00442|RTCA_HUMAN;sp|O00442-2|RTCA_HUMAN	2	3	11.7	39.336	366	257130000	8	13533000	0	0	0	0	0	0	0	0	0
NDUFA4	O00483	NDUA4_HUMAN	+	cellmembrane							+																	Cytochrome c oxidase subunit NDUFA4 OS=Homo sapiens OX=9606 GN=NDUFA4 PE=1 SV=1	sp|O00483|NDUA4_HUMAN	0	24.239	sp|O00483|NDUA4_HUMAN	1	4	55.6	9.3697	81	846760000	84	141130000	1	1	1	1	5	7	2	12	14
PSMD14	O00487	PSDE_HUMAN	+	cellpart							+																	26S proteasome non-ATPase regulatory subunit 14 OS=Homo sapiens OX=9606 GN=PSMD14 PE=1 SV=1	sp|O00487|PSDE_HUMAN	0.0016854	5.7811	sp|O00487|PSDE_HUMAN	1	5	26.8	34.577	310	156790000	19	11200000	1	1	1	1	3	4	2	7	9
CLDN5	O00501	CLD5_HUMAN	+	cellmembrane		Cell junction					+																	Claudin-5 OS=Homo sapiens OX=9606 GN=CLDN5 PE=2 SV=1	sp|O00501|CLD5_HUMAN	0	18.929	sp|O00501|CLD5_HUMAN	1	2	14.2	23.147	218	455270000	30	91054000	0	1	0	0	7	6	0	13	13
KPNA3	O00505	IMA4_HUMAN	+	cellpart							+																	Importin subunit alpha-4 OS=Homo sapiens OX=9606 GN=KPNA3 PE=1 SV=2	sp|O00505|IMA4_HUMAN	0.0016269	4.9688	sp|O00505|IMA4_HUMAN	1	3	21.7	57.81	521	58733000	9	3670800	0	1	0	0	2	1	0	3	3
VWA5A	O00534	VMA5A_HUMAN	+	cellpart							+																	von Willebrand factor A domain-containing protein 5A OS=Homo sapiens OX=9606 GN=VWA5A PE=2 SV=2;Isoform 3 of von Willebrand factor A domain-containing protein 5A OS=Homo sapiens OX=9606 GN=VWA5A;Isoform 2 of von Willebrand factor A domain-containing protei	sp|O00534|VMA5A_HUMAN;sp|O00534-3|VMA5A_HUMAN;sp|O00534-2|VMA5A_HUMAN	0	14.827	sp|O00534|VMA5A_HUMAN;sp|O00534-3|VMA5A_HUMAN;sp|O00534-2|VMA5A_HUMAN;sp|O00534-4|VMA5A_HUMAN	4	7	17.4	86.488	786	138430000	55	3741400	0	1	0	0	4	3	0	7	7
DDX3X	O00571	DDX3X_HUMAN	+	cellpart			+		+		+																	ATP-dependent RNA helicase DDX3X OS=Homo sapiens OX=9606 GN=DDX3X PE=1 SV=3;Isoform 2 of ATP-dependent RNA helicase DDX3X OS=Homo sapiens OX=9606 GN=DDX3X	sp|O00571|DDX3X_HUMAN;sp|O00571-2|DDX3X_HUMAN	0.0017585	6.9575	sp|O00571|DDX3X_HUMAN;sp|O00571-2|DDX3X_HUMAN;sp|O15523-3|DDX3Y_HUMAN	3	6	13.4	73.243	662	223990000	50	5743400	1	1	0	1	5	6	1	11	12
RNASET2	O00584	RNT2_HUMAN	+	cellpart			+		+		+																	Ribonuclease T2 OS=Homo sapiens OX=9606 GN=RNASET2 PE=1 SV=2	sp|O00584|RNT2_HUMAN	0	14.779	sp|O00584|RNT2_HUMAN	1	7	27.3	29.48	256	333400000	58	22227000	1	1	1	0	6	6	1	12	13
FCN1	O00602	FCN1_HUMAN	+	cellsurface																								Ficolin-1 OS=Homo sapiens OX=9606 GN=FCN1 PE=1 SV=2	sp|O00602|FCN1_HUMAN	0.0017595	6.9746	sp|O00602|FCN1_HUMAN	1	6	49.7	35.078	326	420320000	55	28022000	1	1	1	1	5	5	2	10	12
KPNA4	O00629	IMA3_HUMAN	+	cellpart							+																	Importin subunit alpha-3 OS=Homo sapiens OX=9606 GN=KPNA4 PE=1 SV=1	sp|O00629|IMA3_HUMAN	0	14.496	sp|O00629|IMA3_HUMAN	1	6	25.1	57.886	521	452310000	47	30154000	0	1	0	0	7	8	0	15	15
PPP6C	O00743-2	PPP6_HUMAN	+	cellpart							+																	Isoform 2 of Serine/threonine-protein phosphatase 6 catalytic subunit OS=Homo sapiens OX=9606 GN=PPP6C;Serine/threonine-protein phosphatase 6 catalytic subunit OS=Homo sapiens OX=9606 GN=PPP6C PE=1 SV=1;Isoform 3 of Serine/threonine-protein phosphatase 6 c	sp|O00743-2|PPP6_HUMAN;sp|O00743|PPP6_HUMAN;sp|O00743-3|PPP6_HUMAN	0.0017212	6.3186	sp|O00743-2|PPP6_HUMAN;sp|O00743|PPP6_HUMAN;sp|O00743-3|PPP6_HUMAN	3	6	35.3	32.532	283	446070000	60	29738000	1	1	1	1	9	9	2	18	20
MAN2B1	O00754-2	MA2B1_HUMAN	+	cellpart			+		+		+																	Isoform 2 of Lysosomal alpha-mannosidase OS=Homo sapiens OX=9606 GN=MAN2B1;Lysosomal alpha-mannosidase OS=Homo sapiens OX=9606 GN=MAN2B1 PE=1 SV=3	sp|O00754-2|MA2B1_HUMAN;sp|O00754|MA2B1_HUMAN	0.0014881	3.147	sp|O00754-2|MA2B1_HUMAN;sp|O00754|MA2B1_HUMAN	2	6	11.2	113.61	1010	76743000	12	1534900	0	1	0	0	2	3	0	5	5
C2CD2L	O14523	C2C2L_HUMAN	+	cellmembrane							+																	Phospholipid transfer protein C2CD2L OS=Homo sapiens OX=9606 GN=C2CD2L PE=1 SV=3;Isoform 2 of Phospholipid transfer protein C2CD2L OS=Homo sapiens OX=9606 GN=C2CD2L	sp|O14523|C2C2L_HUMAN;sp|O14523-2|C2C2L_HUMAN	0	45.881	sp|O14523|C2C2L_HUMAN;sp|O14523-2|C2C2L_HUMAN	2	11	27.2	76.18	706	2300600000	308	88484000	1	1	2	3	12	11	5	23	28
COX7A2L	O14548	COX7R_HUMAN	+	cellpart																								Cytochrome c oxidase subunit 7A-related protein, mitochondrial OS=Homo sapiens OX=9606 GN=COX7A2L PE=1 SV=2	sp|O14548|COX7R_HUMAN	0.0016997	6.0375	sp|O14548|COX7R_HUMAN	1	2	40.4	12.615	114	624710000	61	124940000	1	1	0	1	6	7	1	13	14
NDUFAB1	O14561	ACPM_HUMAN	+	cellpart							+																	Acyl carrier protein, mitochondrial OS=Homo sapiens OX=9606 GN=NDUFAB1 PE=1 SV=3	sp|O14561|ACPM_HUMAN	0.0014815	3.0812	sp|O14561|ACPM_HUMAN	1	3	21.2	17.417	156	417110000	43	59587000	0	1	0	0	3	2	0	5	5
COPE	O14579	COPE_HUMAN	+	cellmembrane							+																	Coatomer subunit epsilon OS=Homo sapiens OX=9606 GN=COPE PE=1 SV=3;Isoform 2 of Coatomer subunit epsilon OS=Homo sapiens OX=9606 GN=COPE	sp|O14579|COPE_HUMAN;sp|O14579-2|COPE_HUMAN	0	61.948	sp|O14579|COPE_HUMAN;sp|O14579-2|COPE_HUMAN;sp|O14579-3|COPE_HUMAN	3	9	57.5	34.482	308	1126100000	155	86626000	1	1	1	1	9	10	2	19	21
AP3D1	O14617-4	AP3D1_HUMAN	+	cellmembrane		Endosome					+																	Isoform 4 of AP-3 complex subunit delta-1 OS=Homo sapiens OX=9606 GN=AP3D1;AP-3 complex subunit delta-1 OS=Homo sapiens OX=9606 GN=AP3D1 PE=1 SV=1;Isoform 5 of AP-3 complex subunit delta-1 OS=Homo sapiens OX=9606 GN=AP3D1;Isoform 3 of AP-3 complex subunit	sp|O14617-4|AP3D1_HUMAN;sp|O14617|AP3D1_HUMAN;sp|O14617-5|AP3D1_HUMAN;sp|O14617-3|AP3D1_HUMAN;sp|O14617-2|AP3D1_HUMAN	0.0012492	9.3249	sp|O14617-4|AP3D1_HUMAN;sp|O14617|AP3D1_HUMAN;sp|O14617-5|AP3D1_HUMAN;sp|O14617-3|AP3D1_HUMAN;sp|O14617-2|AP3D1_HUMAN	5	9	11.5	114.71	1021	268170000	112	5587000	1	1	4	2	8	9	6	17	23
CCS	O14618	CCS_HUMAN	+	cellpart							+																	Copper chaperone for superoxide dismutase OS=Homo sapiens OX=9606 GN=CCS PE=1 SV=1	sp|O14618|CCS_HUMAN	0	26.629	sp|O14618|CCS_HUMAN	1	9	51.5	29.04	274	2284100000	264	163150000	1	1	4	2	10	11	6	21	27
ABLIM1	O14639-2	ABLM1_HUMAN	+	cellpart							+																	Isoform 2 of Actin-binding LIM protein 1 OS=Homo sapiens OX=9606 GN=ABLIM1;Isoform 6 of Actin-binding LIM protein 1 OS=Homo sapiens OX=9606 GN=ABLIM1;Actin-binding LIM protein 1 OS=Homo sapiens OX=9606 GN=ABLIM1 PE=1 SV=3	sp|O14639-2|ABLM1_HUMAN;sp|O14639-6|ABLM1_HUMAN;sp|O14639|ABLM1_HUMAN	0	12.547	sp|O14639-2|ABLM1_HUMAN;sp|O14639-6|ABLM1_HUMAN;sp|O14639|ABLM1_HUMAN;sp|O14639-4|ABLM1_HUMAN;sp|O14639-3|ABLM1_HUMAN;sp|O14639-5|ABLM1_HUMAN	6	9	23.5	81.12	718	301970000	121	6710400	1	1	1	2	11	10	3	21	24
GOSR2	O14653	GOSR2_HUMAN	+	cellmembrane		Endosome					+																	Golgi SNAP receptor complex member 2 OS=Homo sapiens OX=9606 GN=GOSR2 PE=1 SV=2;Isoform B of Golgi SNAP receptor complex member 2 OS=Homo sapiens OX=9606 GN=GOSR2	sp|O14653|GOSR2_HUMAN;sp|O14653-2|GOSR2_HUMAN	0.0016502	5.3607	sp|O14653|GOSR2_HUMAN;sp|O14653-2|GOSR2_HUMAN	2	3	19.8	24.775	212	121990000	34	13554000	0	1	0	0	3	4	0	7	7
STX16	O14662-6	STX16_HUMAN	+	cellmembrane		Endosome					+																	Isoform 6 of Syntaxin-16 OS=Homo sapiens OX=9606 GN=STX16;Isoform A of Syntaxin-16 OS=Homo sapiens OX=9606 GN=STX16;Isoform D of Syntaxin-16 OS=Homo sapiens OX=9606 GN=STX16;Isoform E of Syntaxin-16 OS=Homo sapiens OX=9606 GN=STX16;Syntaxin-16 OS=Homo sapi	sp|O14662-6|STX16_HUMAN;sp|O14662-2|STX16_HUMAN;sp|O14662-4|STX16_HUMAN;sp|O14662-5|STX16_HUMAN;sp|O14662|STX16_HUMAN	0.0012438	9.1666	sp|O14662-6|STX16_HUMAN;sp|O14662-2|STX16_HUMAN;sp|O14662-4|STX16_HUMAN;sp|O14662-5|STX16_HUMAN;sp|O14662|STX16_HUMAN;sp|O14662-3|STX16_HUMAN	6	5	36	31.073	272	298470000	50	21319000	0	1	0	0	6	5	0	11	11
ACOT8	O14734	ACOT8_HUMAN	+	cellpart							+																	Acyl-coenzyme A thioesterase 8 OS=Homo sapiens OX=9606 GN=ACOT8 PE=1 SV=1	sp|O14734|ACOT8_HUMAN	0	20.148	sp|O14734|ACOT8_HUMAN	1	3	18.2	35.914	319	219370000	39	13710000	0	1	0	0	6	6	0	12	12
SLC9A3R1	O14745	NHRF1_HUMAN	+	cellpart			+		+		+																	Na(+)/H(+) exchange regulatory cofactor NHE-RF1 OS=Homo sapiens OX=9606 GN=SLC9A3R1 PE=1 SV=4	sp|O14745|NHRF1_HUMAN	0	26.533	sp|O14745|NHRF1_HUMAN;sp|O14745-2|NHRF1_HUMAN	2	14	46.1	38.868	358	3491800000	517	158720000	1	1	12	11	11	11	23	22	45
TPP1	O14773-2	TPP1_HUMAN	+	cellpart			+		+		+																	Isoform 2 of Tripeptidyl-peptidase 1 OS=Homo sapiens OX=9606 GN=TPP1;Tripeptidyl-peptidase 1 OS=Homo sapiens OX=9606 GN=TPP1 PE=1 SV=2	sp|O14773-2|TPP1_HUMAN;sp|O14773|TPP1_HUMAN	0	111.89	sp|O14773-2|TPP1_HUMAN;sp|O14773|TPP1_HUMAN	2	8	45.6	34.463	320	13032000000	857	1303200000	1	1	9	9	12	12	18	24	42
GNB5	O14775-3	GNB5_HUMAN	+	cellmembrane																								Isoform 3 of Guanine nucleotide-binding protein subunit beta-5 OS=Homo sapiens OX=9606 GN=GNB5;Isoform 2 of Guanine nucleotide-binding protein subunit beta-5 OS=Homo sapiens OX=9606 GN=GNB5;Guanine nucleotide-binding protein subunit beta-5 OS=Homo sapiens	sp|O14775-3|GNB5_HUMAN;sp|O14775-2|GNB5_HUMAN;sp|O14775|GNB5_HUMAN	0.0015113	3.4594	sp|O14775-3|GNB5_HUMAN;sp|O14775-2|GNB5_HUMAN;sp|O14775|GNB5_HUMAN	3	2	13.1	31.247	283	383060000	51	25537000	0	1	0	0	4	4	0	8	8
APOL1	O14791-2	APOL1_HUMAN	+	serum/plasma	apolipo			+		+																		Isoform 2 of Apolipoprotein L1 OS=Homo sapiens OX=9606 GN=APOL1;Apolipoprotein L1 OS=Homo sapiens OX=9606 GN=APOL1 PE=1 SV=5;Isoform 3 of Apolipoprotein L1 OS=Homo sapiens OX=9606 GN=APOL1	sp|O14791-2|APOL1_HUMAN;sp|O14791|APOL1_HUMAN;sp|O14791-3|APOL1_HUMAN	0	323.31	sp|O14791-2|APOL1_HUMAN;sp|O14791|APOL1_HUMAN;sp|O14791-3|APOL1_HUMAN	3	31	62.3	45.918	414	95630000000	4121	4781500000	1	1	12	12	12	12	24	24	48
PSMA7	O14818	PSA7_HUMAN	+	cellpart			+		+		+																	Proteasome subunit alpha type-7 OS=Homo sapiens OX=9606 GN=PSMA7 PE=1 SV=1;Isoform 2 of Proteasome subunit alpha type-7 OS=Homo sapiens OX=9606 GN=PSMA7	sp|O14818|PSA7_HUMAN;sp|O14818-2|PSA7_HUMAN	0	80.035	sp|O14818|PSA7_HUMAN;sp|O14818-2|PSA7_HUMAN;sp|O14818-4|PSA7_HUMAN;sp|Q8TAA3-2|PSMA8_HUMAN;sp|Q8TAA3-5|PSMA8_HUMAN;sp|Q8TAA3|PSMA8_HUMAN	6	13	58.9	27.887	248	7419100000	821	529930000	1	1	11	11	12	12	22	24	46
SCAMP3	O14828	SCAM3_HUMAN	+	cellmembrane			+		+		+																	Secretory carrier-associated membrane protein 3 OS=Homo sapiens OX=9606 GN=SCAMP3 PE=1 SV=3;Isoform 2 of Secretory carrier-associated membrane protein 3 OS=Homo sapiens OX=9606 GN=SCAMP3	sp|O14828|SCAM3_HUMAN;sp|O14828-2|SCAM3_HUMAN	0	36.795	sp|O14828|SCAM3_HUMAN;sp|O14828-2|SCAM3_HUMAN	2	7	27.7	38.287	347	937560000	100	93756000	0	1	0	0	8	8	0	16	16
BCKDK	O14874-2	BCKD_HUMAN	+	cellpart							+																	Isoform 2 of [3-methyl-2-oxobutanoate dehydrogenase [lipoamide]] kinase, mitochondrial OS=Homo sapiens OX=9606 GN=BCKDK;Isoform 3 of [3-methyl-2-oxobutanoate dehydrogenase [lipoamide]] kinase, mitochondrial OS=Homo sapiens OX=9606 GN=BCKDK;[3-methyl-2-oxob	sp|O14874-2|BCKD_HUMAN;sp|O14874-3|BCKD_HUMAN;sp|O14874|BCKD_HUMAN	0	21.548	sp|O14874-2|BCKD_HUMAN;sp|O14874-3|BCKD_HUMAN;sp|O14874|BCKD_HUMAN	3	4	21.8	37.767	335	291310000	33	16184000	0	1	0	0	4	3	0	7	7
MGST3	O14880	MGST3_HUMAN	+	cellmembrane							+																	Microsomal glutathione S-transferase 3 OS=Homo sapiens OX=9606 GN=MGST3 PE=1 SV=1	sp|O14880|MGST3_HUMAN	0	76.828	sp|O14880|MGST3_HUMAN	1	8	90.8	16.516	152	4000300000	347	571470000	1	1	4	3	11	12	7	23	30
UQCRQ	O14949	QCR8_HUMAN	+	cellpart							+																	Cytochrome b-c1 complex subunit 8 OS=Homo sapiens OX=9606 GN=UQCRQ PE=1 SV=4	sp|O14949|QCR8_HUMAN	0	17.192	sp|O14949|QCR8_HUMAN	1	2	24.4	9.9062	82	1297100000	89	216190000	1	1	1	2	9	10	3	19	22
MYL12B	O14950	ML12B_HUMAN	+	cellpart			+		+		+																	Myosin regulatory light chain 12B OS=Homo sapiens OX=9606 GN=MYL12B PE=1 SV=2	sp|O14950|ML12B_HUMAN	0	18	sp|O14950|ML12B_HUMAN	1	2	83.7	19.779	172	128900000	10	14322000	0	1	0	0	2	1	0	3	3
HGS	O14964-2	HGS_HUMAN	+	cellmembrane		Endosome	+		+		+																	Isoform 2 of Hepatocyte growth factor-regulated tyrosine kinase substrate OS=Homo sapiens OX=9606 GN=HGS;Hepatocyte growth factor-regulated tyrosine kinase substrate OS=Homo sapiens OX=9606 GN=HGS PE=1 SV=1	sp|O14964-2|HGS_HUMAN;sp|O14964|HGS_HUMAN	0.0015228	3.5615	sp|O14964-2|HGS_HUMAN;sp|O14964|HGS_HUMAN	2	2	6.2	76.375	690	27659000	5	1152500	0	0	0	0	0	0	0	0	0
PPP1R12A	O14974-4	MYPT1_HUMAN	+	cellpart		focal adhesion					+																	Isoform 4 of Protein phosphatase 1 regulatory subunit 12A OS=Homo sapiens OX=9606 GN=PPP1R12A;Isoform 3 of Protein phosphatase 1 regulatory subunit 12A OS=Homo sapiens OX=9606 GN=PPP1R12A;Protein phosphatase 1 regulatory subunit 12A OS=Homo sapiens OX=9606	sp|O14974-4|MYPT1_HUMAN;sp|O14974-3|MYPT1_HUMAN;sp|O14974|MYPT1_HUMAN;sp|O14974-5|MYPT1_HUMAN;sp|O14974-2|MYPT1_HUMAN	0	26.747	sp|O14974-4|MYPT1_HUMAN;sp|O14974-3|MYPT1_HUMAN;sp|O14974|MYPT1_HUMAN;sp|O14974-5|MYPT1_HUMAN;sp|O14974-2|MYPT1_HUMAN	5	12	18.1	109.1	971	1474500000	162	32767000	1	1	4	2	9	10	6	19	25
XPO1	O14980	XPO1_HUMAN	+	cellpart							+																	Exportin-1 OS=Homo sapiens OX=9606 GN=XPO1 PE=1 SV=1	sp|O14980|XPO1_HUMAN	0.0012477	9.3067	sp|O14980|XPO1_HUMAN	1	12	19	123.38	1071	461660000	88	8710700	1	1	2	4	5	7	6	12	18
PLXNB2	O15031	PLXB2_HUMAN	+	cellmembrane			+		+		+																	Plexin-B2 OS=Homo sapiens OX=9606 GN=PLXNB2 PE=1 SV=3	sp|O15031|PLXB2_HUMAN	0	136.4	sp|O15031|PLXB2_HUMAN	1	33	31.7	205.12	1838	2349100000	359	27315000	1	1	0	1	10	10	1	20	21
FYB1	O15117-3	FYB1_HUMAN	+	cellpart		Cell junction																						Isoform 3 of FYN-binding protein 1 OS=Homo sapiens OX=9606 GN=FYB1;Isoform FYB-130 of FYN-binding protein 1 OS=Homo sapiens OX=9606 GN=FYB1;FYN-binding protein 1 OS=Homo sapiens OX=9606 GN=FYB1 PE=1 SV=2	sp|O15117-3|FYB1_HUMAN;sp|O15117-2|FYB1_HUMAN;sp|O15117|FYB1_HUMAN	0	45.108	sp|O15117-3|FYB1_HUMAN;sp|O15117-2|FYB1_HUMAN;sp|O15117|FYB1_HUMAN	3	17	31.6	91.65	839	6478900000	610	239960000	1	1	8	8	11	11	16	22	38
SCAMP1	O15126	SCAM1_HUMAN	+	cellmembrane							+																	Secretory carrier-associated membrane protein 1 OS=Homo sapiens OX=9606 GN=SCAMP1 PE=1 SV=2;Isoform 2 of Secretory carrier-associated membrane protein 1 OS=Homo sapiens OX=9606 GN=SCAMP1	sp|O15126|SCAM1_HUMAN;sp|O15126-2|SCAM1_HUMAN	0.001606	4.5858	sp|O15126|SCAM1_HUMAN;sp|O15126-2|SCAM1_HUMAN	2	5	29.9	37.92	338	596840000	45	49737000	0	1	0	0	6	5	0	11	11
SCAMP2	O15127	SCAM2_HUMAN	+	cellmembrane			+		+		+																	Secretory carrier-associated membrane protein 2 OS=Homo sapiens OX=9606 GN=SCAMP2 PE=1 SV=2	sp|O15127|SCAM2_HUMAN	0	323.31	sp|O15127|SCAM2_HUMAN	1	2	9.7	36.648	329	6415500000	329	1069300000	1	1	7	6	11	11	13	22	35
ARPC1B	O15143	ARC1B_HUMAN	+	cellpart		focal adhesion	+		+		+																	Actin-related protein 2/3 complex subunit 1B OS=Homo sapiens OX=9606 GN=ARPC1B PE=1 SV=3	sp|O15143|ARC1B_HUMAN	0	323.31	sp|O15143|ARC1B_HUMAN	1	33	76.3	40.949	372	178150000000	4546	9897100000	1	1	12	12	12	12	24	24	48
ARPC2	O15144	ARPC2_HUMAN	+	cellpart		Cell junction	+		+		+																	Actin-related protein 2/3 complex subunit 2 OS=Homo sapiens OX=9606 GN=ARPC2 PE=1 SV=1	sp|O15144|ARPC2_HUMAN	0	290.54	sp|O15144|ARPC2_HUMAN	1	40	82	34.333	300	64133000000	2883	3375400000	1	1	12	12	12	12	24	24	48
ARPC3	O15145	ARPC3_HUMAN	+	cellpart		focal adhesion	+		+		+																	Actin-related protein 2/3 complex subunit 3 OS=Homo sapiens OX=9606 GN=ARPC3 PE=1 SV=3	sp|O15145|ARPC3_HUMAN	0	199.2	sp|O15145|ARPC3_HUMAN	1	19	80.3	20.546	178	56401000000	1865	5640100000	1	1	12	12	12	12	24	24	48
BET1	O15155	BET1_HUMAN	+	cellmembrane							+																	BET1 homolog OS=Homo sapiens OX=9606 GN=BET1 PE=1 SV=1;Isoform 2 of BET1 homolog OS=Homo sapiens OX=9606 GN=BET1	sp|O15155|BET1_HUMAN;sp|O15155-2|BET1_HUMAN	0.00063052	9.5557	sp|O15155|BET1_HUMAN;sp|O15155-2|BET1_HUMAN	2	2	24.6	13.289	118	1183900000	114	394620000	1	1	3	4	10	10	7	20	27
PGRMC2	O15173	PGRC2_HUMAN	+	cellmembrane							+																	Membrane-associated progesterone receptor component 2 OS=Homo sapiens OX=9606 GN=PGRMC2 PE=1 SV=1;Isoform 2 of Membrane-associated progesterone receptor component 2 OS=Homo sapiens OX=9606 GN=PGRMC2	sp|O15173|PGRC2_HUMAN;sp|O15173-2|PGRC2_HUMAN	0	59.168	sp|O15173|PGRC2_HUMAN;sp|O15173-2|PGRC2_HUMAN	2	12	50.7	23.818	223	2945800000	166	327320000	1	1	2	3	10	10	5	20	25
ADAMDEC1	O15204	ADEC1_HUMAN	+	cellsurface							+																	ADAM DEC1 OS=Homo sapiens OX=9606 GN=ADAMDEC1 PE=1 SV=2;Isoform 2 of ADAM DEC1 OS=Homo sapiens OX=9606 GN=ADAMDEC1	sp|O15204|ADEC1_HUMAN;sp|O15204-2|ADEC1_HUMAN	0.0042533	2.3399	sp|O15204|ADEC1_HUMAN;sp|O15204-2|ADEC1_HUMAN	2	4	13.6	52.775	470	92230000	17	4391900	0	1	0	0	7	6	0	13	13
PFDN6	O15212	PFD6_HUMAN	+	cellpart							+																	Prefoldin subunit 6 OS=Homo sapiens OX=9606 GN=PFDN6 PE=1 SV=1	sp|O15212|PFD6_HUMAN	0.001506	3.4353	sp|O15212|PFD6_HUMAN	1	4	40.3	14.582	129	130180000	15	16273000	0	1	0	0	2	3	0	5	5
ZNF185	O15231-5	ZN185_HUMAN	+	cellpart		Cell junction					+																	Isoform 5 of Zinc finger protein 185 OS=Homo sapiens OX=9606 GN=ZNF185;Isoform 9 of Zinc finger protein 185 OS=Homo sapiens OX=9606 GN=ZNF185;Isoform 2 of Zinc finger protein 185 OS=Homo sapiens OX=9606 GN=ZNF185;Isoform 4 of Zinc finger protein 185 OS=Hom	sp|O15231-5|ZN185_HUMAN;sp|O15231-9|ZN185_HUMAN;sp|O15231-2|ZN185_HUMAN;sp|O15231-4|ZN185_HUMAN;sp|O15231-7|ZN185_HUMAN;sp|O15231|ZN185_HUMAN;sp|O15231-3|ZN185_HUMAN;sp|O15231-8|ZN185_HUMAN;sp|O15231-6|ZN185_HUMAN	0.0099054	1.784	sp|O15231-5|ZN185_HUMAN;sp|O15231-9|ZN185_HUMAN;sp|O15231-2|ZN185_HUMAN;sp|O15231-4|ZN185_HUMAN;sp|O15231-7|ZN185_HUMAN;sp|O15231|ZN185_HUMAN;sp|O15231-3|ZN185_HUMAN;sp|O15231-8|ZN185_HUMAN;sp|O15231-6|ZN185_HUMAN	9	4	16.9	49.971	468	129520000	9	5396500	1	0	1	1	0	0	2	0	2
RER1	O15258	RER1_HUMAN	+	cellmembrane							+																	Protein RER1 OS=Homo sapiens OX=9606 GN=RER1 PE=1 SV=1	sp|O15258|RER1_HUMAN	0.0017381	6.6198	sp|O15258|RER1_HUMAN	1	4	29.6	22.958	196	904350000	45	100480000	0	1	0	0	7	6	0	13	13
SURF4	O15260	SURF4_HUMAN	+	cellmembrane							+																	Surfeit locus protein 4 OS=Homo sapiens OX=9606 GN=SURF4 PE=1 SV=3;Isoform 2 of Surfeit locus protein 4 OS=Homo sapiens OX=9606 GN=SURF4;Isoform 3 of Surfeit locus protein 4 OS=Homo sapiens OX=9606 GN=SURF4	sp|O15260|SURF4_HUMAN;sp|O15260-2|SURF4_HUMAN;sp|O15260-3|SURF4_HUMAN	0	129.69	sp|O15260|SURF4_HUMAN;sp|O15260-2|SURF4_HUMAN;sp|O15260-3|SURF4_HUMAN	3	5	19	30.394	269	2520200000	282	280020000	1	1	10	10	12	12	20	24	44
SPTLC1	O15269	SPTC1_HUMAN	+	cellmembrane							+																	Serine palmitoyltransferase 1 OS=Homo sapiens OX=9606 GN=SPTLC1 PE=1 SV=1	sp|O15269|SPTC1_HUMAN	0	36.443	sp|O15269|SPTC1_HUMAN;sp|O15269-2|SPTC1_HUMAN	2	8	30.2	52.743	473	598480000	70	28499000	1	1	2	2	6	5	4	11	15
SPTLC2	O15270	SPTC2_HUMAN	+	cellmembrane							+																	Serine palmitoyltransferase 2 OS=Homo sapiens OX=9606 GN=SPTLC2 PE=1 SV=1	sp|O15270|SPTC2_HUMAN	0	17.164	sp|O15270|SPTC2_HUMAN	1	3	9.1	62.924	562	214190000	51	6490600	0	1	0	0	5	5	0	10	10
PMM2	O15305-2	PMM2_HUMAN	+	cellpart							+																	Isoform 2 of Phosphomannomutase 2 OS=Homo sapiens OX=9606 GN=PMM2;Phosphomannomutase 2 OS=Homo sapiens OX=9606 GN=PMM2 PE=1 SV=1	sp|O15305-2|PMM2_HUMAN;sp|O15305|PMM2_HUMAN	0.0015259	3.5945	sp|O15305-2|PMM2_HUMAN;sp|O15305|PMM2_HUMAN	2	2	37.8	13.428	119	31522000	2	5253600	0	0	0	0	0	0	0	0	0
INPP4B	O15327	INP4B_HUMAN	+	cellpart							+																	Inositol polyphosphate 4-phosphatase type II OS=Homo sapiens OX=9606 GN=INPP4B PE=1 SV=4	sp|O15327|INP4B_HUMAN	0.001243	9.1591	sp|O15327|INP4B_HUMAN;sp|O15327-2|INP4B_HUMAN	2	7	14.7	104.74	924	261960000	56	5346200	0	1	0	0	4	4	0	8	8
STX7	O15400-2	STX7_HUMAN	+	cellmembrane			+		+		+																	Isoform 2 of Syntaxin-7 OS=Homo sapiens OX=9606 GN=STX7;Syntaxin-7 OS=Homo sapiens OX=9606 GN=STX7 PE=1 SV=4	sp|O15400-2|STX7_HUMAN;sp|O15400|STX7_HUMAN	0	52.447	sp|O15400-2|STX7_HUMAN;sp|O15400|STX7_HUMAN	2	10	69	27.4	239	2419500000	284	241950000	1	1	9	8	12	11	17	23	40
ABCC3	O15438	MRP3_HUMAN	+	cellmembrane							+																	Canalicular multispecific organic anion transporter 2 OS=Homo sapiens OX=9606 GN=ABCC3 PE=1 SV=3;Isoform 2 of Canalicular multispecific organic anion transporter 2 OS=Homo sapiens OX=9606 GN=ABCC3;Isoform 4 of Canalicular multispecific organic anion transp	sp|O15438|MRP3_HUMAN;sp|O15438-2|MRP3_HUMAN;sp|O15438-4|MRP3_HUMAN	0.0016287	4.9898	sp|O15438|MRP3_HUMAN;sp|O15438-2|MRP3_HUMAN;sp|O15438-4|MRP3_HUMAN;sp|O15438-5|MRP3_HUMAN	4	6	7.8	169.34	1527	60672000	16	994630	0	1	0	0	2	2	0	4	4
ABCC4	O15439	MRP4_HUMAN	+	cellmembrane							+																	Multidrug resistance-associated protein 4 OS=Homo sapiens OX=9606 GN=ABCC4 PE=1 SV=3;Isoform 2 of Multidrug resistance-associated protein 4 OS=Homo sapiens OX=9606 GN=ABCC4;Isoform 4 of Multidrug resistance-associated protein 4 OS=Homo sapiens OX=9606 GN=A	sp|O15439|MRP4_HUMAN;sp|O15439-2|MRP4_HUMAN;sp|O15439-4|MRP4_HUMAN;sp|O15439-3|MRP4_HUMAN	0	55.498	sp|O15439|MRP4_HUMAN;sp|O15439-2|MRP4_HUMAN;sp|O15439-4|MRP4_HUMAN;sp|O15439-3|MRP4_HUMAN	4	27	31.2	149.52	1325	2858800000	478	41432000	1	1	3	4	11	11	7	22	29
ARPC5	O15511	ARPC5_HUMAN	+	cellpart		focal adhesion	+		+		+																	Actin-related protein 2/3 complex subunit 5 OS=Homo sapiens OX=9606 GN=ARPC5 PE=1 SV=3;Isoform 2 of Actin-related protein 2/3 complex subunit 5 OS=Homo sapiens OX=9606 GN=ARPC5	sp|O15511|ARPC5_HUMAN;sp|O15511-2|ARPC5_HUMAN	0	323.31	sp|O15511|ARPC5_HUMAN;sp|O15511-2|ARPC5_HUMAN	2	13	88.1	16.32	151	93924000000	1998	9392400000	1	1	12	12	12	12	24	24	48
TAPBP	O15533-2	TPSN_HUMAN	+	cellmembrane							+																	Isoform 2 of Tapasin OS=Homo sapiens OX=9606 GN=TAPBP;Tapasin OS=Homo sapiens OX=9606 GN=TAPBP PE=1 SV=1;Isoform 3 of Tapasin OS=Homo sapiens OX=9606 GN=TAPBP;Isoform 4 of Tapasin OS=Homo sapiens OX=9606 GN=TAPBP	sp|O15533-2|TPSN_HUMAN;sp|O15533|TPSN_HUMAN;sp|O15533-3|TPSN_HUMAN;sp|O15533-4|TPSN_HUMAN	0	65.977	sp|O15533-2|TPSN_HUMAN;sp|O15533|TPSN_HUMAN;sp|O15533-3|TPSN_HUMAN;sp|O15533-4|TPSN_HUMAN	4	12	46.8	43.885	412	17245000000	790	1724500000	1	1	8	10	12	12	18	24	42
ZZEF1	O43149	ZZEF1_HUMAN	+	cellpart							+																	Zinc finger ZZ-type and EF-hand domain-containing protein 1 OS=Homo sapiens OX=9606 GN=ZZEF1 PE=1 SV=6	sp|O43149|ZZEF1_HUMAN	0	25.016	sp|O43149|ZZEF1_HUMAN;sp|O43149-3|ZZEF1_HUMAN;sp|O43149-2|ZZEF1_HUMAN	3	20	11.2	331.07	2961	851040000	118	6496500	1	1	2	2	9	10	4	19	23
ASAP2	O43150-2	ASAP2_HUMAN	+	cellpart							+																	Isoform 2 of Arf-GAP with SH3 domain, ANK repeat and PH domain-containing protein 2 OS=Homo sapiens OX=9606 GN=ASAP2;Arf-GAP with SH3 domain, ANK repeat and PH domain-containing protein 2 OS=Homo sapiens OX=9606 GN=ASAP2 PE=1 SV=3	sp|O43150-2|ASAP2_HUMAN;sp|O43150|ASAP2_HUMAN	0	46.085	sp|O43150-2|ASAP2_HUMAN;sp|O43150|ASAP2_HUMAN	2	10	21.7	106.98	961	1483800000	147	34507000	1	1	2	1	9	11	3	20	23
CYB5B	O43169	CYB5B_HUMAN	+	cellmembrane							+																	Cytochrome b5 type B OS=Homo sapiens OX=9606 GN=CYB5B PE=1 SV=3	sp|O43169|CYB5B_HUMAN	0	88.844	sp|O43169|CYB5B_HUMAN	1	7	66.7	16.694	150	11812000000	531	1968600000	1	1	10	9	12	12	19	24	43
NDUFS4	O43181	NDUS4_HUMAN	+	cellmembrane							+																	NADH dehydrogenase [ubiquinone] iron-sulfur protein 4, mitochondrial OS=Homo sapiens OX=9606 GN=NDUFS4 PE=1 SV=1	sp|O43181|NDUS4_HUMAN	0.0006605	11.309	sp|O43181|NDUS4_HUMAN	1	5	35.4	20.108	175	612960000	48	68107000	0	1	0	0	5	5	0	10	10
ARHGAP6	O43182-4	RHG06_HUMAN	+	cellpart							+																	Isoform 4 of Rho GTPase-activating protein 6 OS=Homo sapiens OX=9606 GN=ARHGAP6;Rho GTPase-activating protein 6 OS=Homo sapiens OX=9606 GN=ARHGAP6 PE=1 SV=3;Isoform 5 of Rho GTPase-activating protein 6 OS=Homo sapiens OX=9606 GN=ARHGAP6;Isoform 2 of Rho GT	sp|O43182-4|RHG06_HUMAN;sp|O43182|RHG06_HUMAN;sp|O43182-5|RHG06_HUMAN;sp|O43182-3|RHG06_HUMAN;sp|O43182-2|RHG06_HUMAN	0	24.706	sp|O43182-4|RHG06_HUMAN;sp|O43182|RHG06_HUMAN;sp|O43182-5|RHG06_HUMAN;sp|O43182-3|RHG06_HUMAN;sp|O43182-2|RHG06_HUMAN	5	12	20.4	84.843	771	1487800000	292	39152000	1	1	4	3	11	11	7	22	29
PSMD3	O43242	PSMD3_HUMAN	+	cellpart			+		+		+																	26S proteasome non-ATPase regulatory subunit 3 OS=Homo sapiens OX=9606 GN=PSMD3 PE=1 SV=2;Isoform 2 of 26S proteasome non-ATPase regulatory subunit 3 OS=Homo sapiens OX=9606 GN=PSMD3	sp|O43242|PSMD3_HUMAN;sp|O43242-2|PSMD3_HUMAN	0.0016331	5.0883	sp|O43242|PSMD3_HUMAN;sp|O43242-2|PSMD3_HUMAN	2	7	20	60.977	534	301420000	62	8865300	1	1	1	1	6	6	2	12	14
TGFB1I1	O43294	TGFI1_HUMAN	+	cellmembrane		Cell junction					+																	Transforming growth factor beta-1-induced transcript 1 protein OS=Homo sapiens OX=9606 GN=TGFB1I1 PE=1 SV=2	sp|O43294|TGFI1_HUMAN	0	152.32	sp|O43294|TGFI1_HUMAN	1	22	79.8	49.814	461	18652000000	1326	810950000	1	1	11	11	12	12	22	24	46
ADCY6	O43306	ADCY6_HUMAN	+	cellmembrane							+																	Adenylate cyclase type 6 OS=Homo sapiens OX=9606 GN=ADCY6 PE=1 SV=2;Isoform 2 of Adenylate cyclase type 6 OS=Homo sapiens OX=9606 GN=ADCY6	sp|O43306|ADCY6_HUMAN;sp|O43306-2|ADCY6_HUMAN	0	80.728	sp|O43306|ADCY6_HUMAN;sp|O43306-2|ADCY6_HUMAN;sp|O95622-2|ADCY5_HUMAN;sp|O95622|ADCY5_HUMAN	4	22	25.7	130.61	1168	4283700000	533	99621000	1	1	8	7	11	11	15	22	37
MTSS1	O43312-4	MTSS1_HUMAN	+	cellpart							+																	Isoform 3 of Protein MTSS 1 OS=Homo sapiens OX=9606 GN=MTSS1;Protein MTSS 1 OS=Homo sapiens OX=9606 GN=MTSS1 PE=1 SV=2;Isoform 4 of Protein MTSS 1 OS=Homo sapiens OX=9606 GN=MTSS1	sp|O43312-4|MTSS1_HUMAN;sp|O43312|MTSS1_HUMAN;sp|O43312-5|MTSS1_HUMAN	0	40.657	sp|O43312-4|MTSS1_HUMAN;sp|O43312|MTSS1_HUMAN;sp|O43312-5|MTSS1_HUMAN;sp|O43312-2|MTSS1_HUMAN	4	10	17.9	79.143	730	372700000	45	12423000	1	1	0	1	4	6	1	10	11
EEF1E1	O43324-2	MCA3_HUMAN	+	cellpart							+																	Isoform 2 of Eukaryotic translation elongation factor 1 epsilon-1 OS=Homo sapiens OX=9606 GN=EEF1E1;Eukaryotic translation elongation factor 1 epsilon-1 OS=Homo sapiens OX=9606 GN=EEF1E1 PE=1 SV=1	sp|O43324-2|MCA3_HUMAN;sp|O43324|MCA3_HUMAN	0.0016225	4.8559	sp|O43324-2|MCA3_HUMAN;sp|O43324|MCA3_HUMAN	2	3	26.6	15.548	139	198830000	51	22092000	0	1	0	0	4	6	0	10	10
TXNL1	O43396	TXNL1_HUMAN	+	cellpart							+																	Thioredoxin-like protein 1 OS=Homo sapiens OX=9606 GN=TXNL1 PE=1 SV=3	sp|O43396|TXNL1_HUMAN	0	64.658	sp|O43396|TXNL1_HUMAN	1	11	62.3	32.251	289	6690500000	514	446030000	1	1	10	11	12	11	21	23	44
TPD52L2	O43399-6	TPD54_HUMAN	+	cellpart							+																	Isoform 6 of Tumor protein D54 OS=Homo sapiens OX=9606 GN=TPD52L2;Isoform 2 of Tumor protein D54 OS=Homo sapiens OX=9606 GN=TPD52L2;Isoform 4 of Tumor protein D54 OS=Homo sapiens OX=9606 GN=TPD52L2;Tumor protein D54 OS=Homo sapiens OX=9606 GN=TPD52L2 PE=1	sp|O43399-6|TPD54_HUMAN;sp|O43399-2|TPD54_HUMAN;sp|O43399-4|TPD54_HUMAN;sp|O43399|TPD54_HUMAN;sp|O43399-3|TPD54_HUMAN;sp|O43399-5|TPD54_HUMAN;sp|O43399-7|TPD54_HUMAN	0	16.152	sp|O43399-6|TPD54_HUMAN;sp|O43399-2|TPD54_HUMAN;sp|O43399-4|TPD54_HUMAN;sp|O43399|TPD54_HUMAN;sp|O43399-3|TPD54_HUMAN;sp|O43399-5|TPD54_HUMAN;sp|O43399-7|TPD54_HUMAN	7	4	24.5	17.473	163	1440800000	113	180100000	1	1	3	3	12	12	6	24	30
COCH	O43405	COCH_HUMAN	+	cellsurface																								Cochlin OS=Homo sapiens OX=9606 GN=COCH PE=1 SV=1;Isoform 2 of Cochlin OS=Homo sapiens OX=9606 GN=COCH	sp|O43405|COCH_HUMAN;sp|O43405-2|COCH_HUMAN	0	59.402	sp|O43405|COCH_HUMAN;sp|O43405-2|COCH_HUMAN	2	17	45.1	59.482	550	2666500000	201	98759000	1	1	2	2	3	3	4	6	10
HTRA2	O43464-3	HTRA2_HUMAN	+	cellmembrane							+																	Isoform 3 of Serine protease HTRA2, mitochondrial OS=Homo sapiens OX=9606 GN=HTRA2;Serine protease HTRA2, mitochondrial OS=Homo sapiens OX=9606 GN=HTRA2 PE=1 SV=2;Isoform 2 of Serine protease HTRA2, mitochondrial OS=Homo sapiens OX=9606 GN=HTRA2;Isoform 4	sp|O43464-3|HTRA2_HUMAN;sp|O43464|HTRA2_HUMAN;sp|O43464-2|HTRA2_HUMAN;sp|O43464-4|HTRA2_HUMAN	0	21.116	sp|O43464-3|HTRA2_HUMAN;sp|O43464|HTRA2_HUMAN;sp|O43464-2|HTRA2_HUMAN;sp|O43464-4|HTRA2_HUMAN	4	5	30	46.381	436	1014400000	54	48305000	0	1	0	0	6	8	0	14	14
AKR7A2	O43488	ARK72_HUMAN	+	cellpart			+		+		+																	Aflatoxin B1 aldehyde reductase member 2 OS=Homo sapiens OX=9606 GN=AKR7A2 PE=1 SV=3	sp|O43488|ARK72_HUMAN	0	42.142	sp|O43488|ARK72_HUMAN;sp|Q8NHP1|ARK74_HUMAN;sp|Q8NHP1-3|ARK74_HUMAN	3	13	57.7	39.589	359	6308800000	673	371110000	1	1	7	8	11	11	15	22	37
TGOLN2	O43493-2	TGON2_HUMAN	+	cellmembrane							+																	Isoform TGN46 of Trans-Golgi network integral membrane protein 2 OS=Homo sapiens OX=9606 GN=TGOLN2;Isoform 5 of Trans-Golgi network integral membrane protein 2 OS=Homo sapiens OX=9606 GN=TGOLN2;Isoform TGN48 of Trans-Golgi network integral membrane protein	sp|O43493-2|TGON2_HUMAN;sp|O43493-5|TGON2_HUMAN;sp|O43493-3|TGON2_HUMAN;sp|O43493|TGON2_HUMAN;sp|O43493-4|TGON2_HUMAN;sp|O43493-6|TGON2_HUMAN	0	27.103	sp|O43493-2|TGON2_HUMAN;sp|O43493-5|TGON2_HUMAN;sp|O43493-3|TGON2_HUMAN;sp|O43493|TGON2_HUMAN;sp|O43493-4|TGON2_HUMAN;sp|O43493-6|TGON2_HUMAN	6	6	20.8	45.879	437	372300000	106	16923000	1	1	1	2	9	10	3	19	22
LAMTOR5	O43504	LTOR5_HUMAN	+	cellpart																								Ragulator complex protein LAMTOR5 OS=Homo sapiens OX=9606 GN=LAMTOR5 PE=1 SV=1	sp|O43504|LTOR5_HUMAN	0	73.625	sp|O43504|LTOR5_HUMAN	1	3	85.7	9.6138	91	5064400000	392	1012900000	1	1	3	3	12	12	6	24	30
WIPF1	O43516-2	WIPF1_HUMAN	+	cellpart							+																	Isoform 2 of WAS/WASL-interacting protein family member 1 OS=Homo sapiens OX=9606 GN=WIPF1;WAS/WASL-interacting protein family member 1 OS=Homo sapiens OX=9606 GN=WIPF1 PE=1 SV=3;Isoform 3 of WAS/WASL-interacting protein family member 1 OS=Homo sapiens OX=	sp|O43516-2|WIPF1_HUMAN;sp|O43516|WIPF1_HUMAN;sp|O43516-3|WIPF1_HUMAN;sp|O43516-4|WIPF1_HUMAN	0.0016575	5.4474	sp|O43516-2|WIPF1_HUMAN;sp|O43516|WIPF1_HUMAN;sp|O43516-3|WIPF1_HUMAN;sp|O43516-4|WIPF1_HUMAN	4	6	26.4	50.281	493	1166500000	71	55550000	0	1	0	0	6	6	0	12	12
LAT	O43561-2	LAT_HUMAN	+	cellmembrane		Cell junction					+																	Isoform 2 of Linker for activation of T-cells family member 1 OS=Homo sapiens OX=9606 GN=LAT;Linker for activation of T-cells family member 1 OS=Homo sapiens OX=9606 GN=LAT PE=1 SV=1;Isoform 3 of Linker for activation of T-cells family member 1 OS=Homo sap	sp|O43561-2|LAT_HUMAN;sp|O43561|LAT_HUMAN;sp|O43561-3|LAT_HUMAN;sp|O43561-4|LAT_HUMAN;sp|O43561-5|LAT_HUMAN	0	14.208	sp|O43561-2|LAT_HUMAN;sp|O43561|LAT_HUMAN;sp|O43561-3|LAT_HUMAN;sp|O43561-4|LAT_HUMAN;sp|O43561-5|LAT_HUMAN	5	2	20.2	24.985	233	265160000	34	53032000	1	1	1	1	5	5	2	10	12
DENR	O43583	DENR_HUMAN	+	cellpart							+																	Density-regulated protein OS=Homo sapiens OX=9606 GN=DENR PE=1 SV=2	sp|O43583|DENR_HUMAN	0.0016295	5.0026	sp|O43583|DENR_HUMAN	1	5	38.4	22.092	198	51586000	22	5731800	1	1	1	1	2	4	2	6	8
TIMM44	O43615	TIM44_HUMAN	+	cellmembrane							+																	Mitochondrial import inner membrane translocase subunit TIM44 OS=Homo sapiens OX=9606 GN=TIMM44 PE=1 SV=2	sp|O43615|TIM44_HUMAN	0.0015416	3.83	sp|O43615|TIM44_HUMAN	1	7	17.9	51.355	452	151390000	13	5220200	0	1	0	0	3	4	0	7	7
NCK2	O43639	NCK2_HUMAN	+	cellpart							+																	Cytoplasmic protein NCK2 OS=Homo sapiens OX=9606 GN=NCK2 PE=1 SV=2	sp|O43639|NCK2_HUMAN	0.0016713	5.634	sp|O43639|NCK2_HUMAN	1	5	15.5	42.915	380	359640000	103	16347000	0	1	0	0	9	10	0	19	19
RGS10	O43665	RGS10_HUMAN	+	cellmembrane							+																	Regulator of G-protein signaling 10 OS=Homo sapiens OX=9606 GN=RGS10 PE=1 SV=3;Isoform 2 of Regulator of G-protein signaling 10 OS=Homo sapiens OX=9606 GN=RGS10	sp|O43665|RGS10_HUMAN;sp|O43665-2|RGS10_HUMAN	0	63.96	sp|O43665|RGS10_HUMAN;sp|O43665-2|RGS10_HUMAN	2	11	55.8	21.21	181	1857100000	407	232140000	1	1	7	9	12	12	16	24	40
NDUFB5	O43674-2	NDUB5_HUMAN	+	cellmembrane							+																	Isoform 2 of NADH dehydrogenase [ubiquinone] 1 beta subcomplex subunit 5, mitochondrial OS=Homo sapiens OX=9606 GN=NDUFB5;NADH dehydrogenase [ubiquinone] 1 beta subcomplex subunit 5, mitochondrial OS=Homo sapiens OX=9606 GN=NDUFB5 PE=1 SV=1	sp|O43674-2|NDUB5_HUMAN;sp|O43674|NDUB5_HUMAN	0.0015283	3.6092	sp|O43674-2|NDUB5_HUMAN;sp|O43674|NDUB5_HUMAN	2	2	26.3	15.667	137	298980000	34	37373000	0	1	0	0	8	6	0	14	14
NDUFA2	O43678	NDUA2_HUMAN	+	cellmembrane							+																	NADH dehydrogenase [ubiquinone] 1 alpha subcomplex subunit 2 OS=Homo sapiens OX=9606 GN=NDUFA2 PE=1 SV=3;Isoform 2 of NADH dehydrogenase [ubiquinone] 1 alpha subcomplex subunit 2 OS=Homo sapiens OX=9606 GN=NDUFA2	sp|O43678|NDUA2_HUMAN;sp|O43678-2|NDUA2_HUMAN	0	61.067	sp|O43678|NDUA2_HUMAN;sp|O43678-2|NDUA2_HUMAN	2	2	31.3	10.921	99	511100000	61	85184000	0	1	0	0	6	7	0	13	13
ASNA1	O43681	ASNA_HUMAN	+	cellpart			+		+		+																	ATPase ASNA1 OS=Homo sapiens OX=9606 GN=ASNA1 PE=1 SV=2	sp|O43681|ASNA_HUMAN	0.0006689	12.186	sp|O43681|ASNA_HUMAN	1	9	40.2	38.792	348	1248200000	126	83213000	1	1	2	3	10	10	5	20	25
ACTN4	O43707	ACTN4_HUMAN	+	cellpart		Cell junction	+		+		+																	Alpha-actinin-4 OS=Homo sapiens OX=9606 GN=ACTN4 PE=1 SV=2;Isoform ACTN4ISO of Alpha-actinin-4 OS=Homo sapiens OX=9606 GN=ACTN4	sp|O43707|ACTN4_HUMAN;sp|O43707-2|ACTN4_HUMAN	0	323.31	sp|O43707|ACTN4_HUMAN;sp|O43707-2|ACTN4_HUMAN;sp|O43707-3|ACTN4_HUMAN	3	72	93.2	104.85	911	136310000000	6722	2478400000	1	1	12	12	12	12	24	24	48
AP1G1	O43747	AP1G1_HUMAN	+	cellmembrane		Endosome					+																	AP-1 complex subunit gamma-1 OS=Homo sapiens OX=9606 GN=AP1G1 PE=1 SV=5;Isoform 2 of AP-1 complex subunit gamma-1 OS=Homo sapiens OX=9606 GN=AP1G1	sp|O43747|AP1G1_HUMAN;sp|O43747-2|AP1G1_HUMAN	0	29.508	sp|O43747|AP1G1_HUMAN;sp|O43747-2|AP1G1_HUMAN	2	19	34.5	91.35	822	1234400000	267	36307000	1	1	3	3	11	11	6	22	28
STX6	O43752	STX6_HUMAN	+	cellmembrane		Endosome					+																	Syntaxin-6 OS=Homo sapiens OX=9606 GN=STX6 PE=1 SV=1;Isoform 2 of Syntaxin-6 OS=Homo sapiens OX=9606 GN=STX6	sp|O43752|STX6_HUMAN;sp|O43752-2|STX6_HUMAN	0.001692	5.9071	sp|O43752|STX6_HUMAN;sp|O43752-2|STX6_HUMAN	2	2	16.1	29.176	255	42159000	6	3513200	0	1	0	0	1	1	0	2	2
SGTA	O43765	SGTA_HUMAN	+	cellpart							+																	Small glutamine-rich tetratricopeptide repeat-containing protein alpha OS=Homo sapiens OX=9606 GN=SGTA PE=1 SV=1	sp|O43765|SGTA_HUMAN	0.0023992	2.5405	sp|O43765|SGTA_HUMAN	1	4	16.6	34.063	313	112160000	23	9346500	0	1	0	0	3	4	0	7	7
ENSA	O43768-8	ENSA_HUMAN	+	cellpart							+																	Isoform 8 of Alpha-endosulfine OS=Homo sapiens OX=9606 GN=ENSA;Isoform 2 of Alpha-endosulfine OS=Homo sapiens OX=9606 GN=ENSA;Alpha-endosulfine OS=Homo sapiens OX=9606 GN=ENSA PE=1 SV=1;Isoform 9 of Alpha-endosulfine OS=Homo sapiens OX=9606 GN=ENSA;Isoform	sp|O43768-8|ENSA_HUMAN;sp|O43768-2|ENSA_HUMAN;sp|O43768|ENSA_HUMAN;sp|O43768-9|ENSA_HUMAN;sp|O43768-3|ENSA_HUMAN;sp|O43768-4|ENSA_HUMAN	0	72.056	sp|O43768-8|ENSA_HUMAN;sp|O43768-2|ENSA_HUMAN;sp|O43768|ENSA_HUMAN;sp|O43768-9|ENSA_HUMAN;sp|O43768-3|ENSA_HUMAN;sp|O43768-4|ENSA_HUMAN	6	2	21.9	11.99	105	77189000	34	15438000	1	1	1	1	3	4	2	7	9
SLC25A20	O43772	MCAT_HUMAN	+	cellmembrane							+																	Mitochondrial carnitine/acylcarnitine carrier protein OS=Homo sapiens OX=9606 GN=SLC25A20 PE=1 SV=1	sp|O43772|MCAT_HUMAN	0.0012173	8.1671	sp|O43772|MCAT_HUMAN	1	6	33.6	32.943	301	602450000	63	33470000	1	1	2	2	6	6	4	12	16
NARS	O43776	SYNC_HUMAN	+	cellpart			+		+		+																	Asparagine--tRNA ligase, cytoplasmic OS=Homo sapiens OX=9606 GN=NARS PE=1 SV=1	sp|O43776|SYNC_HUMAN	0.0019352	2.6664	sp|O43776|SYNC_HUMAN	1	2	4.9	62.942	548	78490000	13	3567700	0	1	0	0	2	2	0	4	4
KRT86	O43790	KRT86_HUMAN	+	cellpart																							+	;Keratin, type II cuticular Hb6 OS=Homo sapiens OX=9606 GN=KRT86 PE=1 SV=1;Keratin, type II cuticular Hb1 OS=Homo sapiens OX=9606 GN=KRT81 PE=1 SV=3	CON__sp|O43790|KRT86_HUMAN;sp|O43790|KRT86_HUMAN;sp|Q14533|KRT81_HUMAN	0	126.01	CON__sp|O43790|KRT86_HUMAN;sp|O43790|KRT86_HUMAN;sp|Q14533|KRT81_HUMAN	3	21	83.1	53.5	486	18325000000	92	591130000	1	1	1	3	1	1	4	2	6
STRN	O43815	STRN_HUMAN	+	cellmembrane							+																	Striatin OS=Homo sapiens OX=9606 GN=STRN PE=1 SV=4;Isoform 2 of Striatin OS=Homo sapiens OX=9606 GN=STRN	sp|O43815|STRN_HUMAN;sp|O43815-2|STRN_HUMAN	0.00066269	11.48	sp|O43815|STRN_HUMAN;sp|O43815-2|STRN_HUMAN	2	12	25.5	86.131	780	537370000	51	14927000	0	1	0	0	7	6	0	13	13
IDH3B	O43837	IDH3B_HUMAN	+	cellpart							+																	Isocitrate dehydrogenase [NAD] subunit beta, mitochondrial OS=Homo sapiens OX=9606 GN=IDH3B PE=1 SV=2;Isoform A of Isocitrate dehydrogenase [NAD] subunit beta, mitochondrial OS=Homo sapiens OX=9606 GN=IDH3B;Isoform C of Isocitrate dehydrogenase [NAD] subun	sp|O43837|IDH3B_HUMAN;sp|O43837-2|IDH3B_HUMAN;sp|O43837-3|IDH3B_HUMAN	0.00066007	11.307	sp|O43837|IDH3B_HUMAN;sp|O43837-2|IDH3B_HUMAN;sp|O43837-3|IDH3B_HUMAN	3	5	22.6	42.183	385	372350000	59	17731000	0	1	0	0	4	5	0	9	9
CALU	O43852	CALU_HUMAN	+	cellpart							+																	Calumenin OS=Homo sapiens OX=9606 GN=CALU PE=1 SV=2;Isoform 3 of Calumenin OS=Homo sapiens OX=9606 GN=CALU;Isoform 2 of Calumenin OS=Homo sapiens OX=9606 GN=CALU;Isoform 4 of Calumenin OS=Homo sapiens OX=9606 GN=CALU;Isoform 15 of Calumenin OS=Homo sapiens	sp|O43852|CALU_HUMAN;sp|O43852-3|CALU_HUMAN;sp|O43852-2|CALU_HUMAN;sp|O43852-4|CALU_HUMAN;sp|O43852-15|CALU_HUMAN;sp|O43852-5|CALU_HUMAN;sp|O43852-6|CALU_HUMAN;sp|O43852-9|CALU_HUMAN	0	130.06	sp|O43852|CALU_HUMAN;sp|O43852-3|CALU_HUMAN;sp|O43852-2|CALU_HUMAN;sp|O43852-4|CALU_HUMAN;sp|O43852-15|CALU_HUMAN;sp|O43852-5|CALU_HUMAN;sp|O43852-6|CALU_HUMAN;sp|O43852-9|CALU_HUMAN;sp|O43852-10|CALU_HUMAN;sp|O43852-8|CALU_HUMAN;sp|O43852-13|CALU_HUMAN;sp|O43852-14|CALU_HUMAN;sp|O43852-11|CALU_HUMAN;sp|O43852-12|CALU_HUMAN;sp|O43852-7|CALU_HUMAN	15	18	60	37.106	315	5195100000	463	324690000	1	1	5	4	11	10	9	21	30
AHCYL1	O43865	SAHH2_HUMAN	+	cellmembrane			+		+		+																	S-adenosylhomocysteine hydrolase-like protein 1 OS=Homo sapiens OX=9606 GN=AHCYL1 PE=1 SV=2;Isoform 2 of S-adenosylhomocysteine hydrolase-like protein 1 OS=Homo sapiens OX=9606 GN=AHCYL1	sp|O43865|SAHH2_HUMAN;sp|O43865-2|SAHH2_HUMAN	0.0012508	9.3334	sp|O43865|SAHH2_HUMAN;sp|O43865-2|SAHH2_HUMAN	2	12	29.4	58.951	530	4559500000	87	162840000	1	1	3	3	7	8	6	15	21
CD5L	O43866	CD5L_HUMAN	+	cellsurface				+		+																		CD5 antigen-like OS=Homo sapiens OX=9606 GN=CD5L PE=1 SV=1	sp|O43866|CD5L_HUMAN	0	323.31	sp|O43866|CD5L_HUMAN	1	21	61.4	38.087	347	258320000000	4996	14351000000	1	1	12	12	12	12	24	24	48
NDUFS5	O43920	NDUS5_HUMAN	+	cellmembrane							+																	NADH dehydrogenase [ubiquinone] iron-sulfur protein 5 OS=Homo sapiens OX=9606 GN=NDUFS5 PE=1 SV=3	sp|O43920|NDUS5_HUMAN	0.0011869	7.33	sp|O43920|NDUS5_HUMAN	1	8	64.2	12.517	106	1322100000	183	220340000	0	1	0	0	11	11	0	22	22
KALRN	O60229-6	KALRN_HUMAN	+	cellpart			+		+		+																	Isoform 6 of Kalirin OS=Homo sapiens OX=9606 GN=KALRN;Isoform 4 of Kalirin OS=Homo sapiens OX=9606 GN=KALRN;Kalirin OS=Homo sapiens OX=9606 GN=KALRN PE=1 SV=3;Isoform 5 of Kalirin OS=Homo sapiens OX=9606 GN=KALRN	sp|O60229-6|KALRN_HUMAN;sp|O60229-4|KALRN_HUMAN;sp|O60229|KALRN_HUMAN;sp|O60229-5|KALRN_HUMAN	0	62.75	sp|O60229-6|KALRN_HUMAN;sp|O60229-4|KALRN_HUMAN;sp|O60229|KALRN_HUMAN;sp|O60229-5|KALRN_HUMAN;sp|Q86VW2-2|ARHGP_HUMAN;sp|Q86VW2|ARHGP_HUMAN;sp|Q86VW2-3|ARHGP_HUMAN	7	16	18.2	141.16	1257	1768100000	231	31020000	1	1	2	2	9	11	4	20	24
GMFG	O60234	GMFG_HUMAN	+	cellpart							+																	Glia maturation factor gamma OS=Homo sapiens OX=9606 GN=GMFG PE=1 SV=1	sp|O60234|GMFG_HUMAN	0	170.56	sp|O60234|GMFG_HUMAN	1	10	75.4	16.801	142	3371100000	481	421380000	1	1	11	12	11	11	23	22	45
PRPSAP2	O60256-4	KPRB_HUMAN	+	cellpart							+																	Isoform 4 of Phosphoribosyl pyrophosphate synthase-associated protein 2 OS=Homo sapiens OX=9606 GN=PRPSAP2;Isoform 2 of Phosphoribosyl pyrophosphate synthase-associated protein 2 OS=Homo sapiens OX=9606 GN=PRPSAP2;Phosphoribosyl pyrophosphate synthase-asso	sp|O60256-4|KPRB_HUMAN;sp|O60256-2|KPRB_HUMAN;sp|O60256|KPRB_HUMAN;sp|O60256-3|KPRB_HUMAN	0.0016769	5.6962	sp|O60256-4|KPRB_HUMAN;sp|O60256-2|KPRB_HUMAN;sp|O60256|KPRB_HUMAN;sp|O60256-3|KPRB_HUMAN	4	4	27.6	31.321	283	143670000	23	8451100	0	1	0	0	5	7	0	12	12
GNG7	O60262	GBG7_HUMAN	+	cellmembrane			+		+		+																	Guanine nucleotide-binding protein G(I)/G(S)/G(O) subunit gamma-7 OS=Homo sapiens OX=9606 GN=GNG7 PE=1 SV=1	sp|O60262|GBG7_HUMAN	0.0042715	2.3827	sp|O60262|GBG7_HUMAN	1	2	39.7	7.5217	68	233920000	24	58480000	0	1	0	0	2	5	0	7	7
KIAA0513	O60268	K0513_HUMAN	+	cellpart							+																	Uncharacterized protein KIAA0513 OS=Homo sapiens OX=9606 GN=KIAA0513 PE=1 SV=1;Isoform 3 of Uncharacterized protein KIAA0513 OS=Homo sapiens OX=9606 GN=KIAA0513	sp|O60268|K0513_HUMAN;sp|O60268-3|K0513_HUMAN	0	24.251	sp|O60268|K0513_HUMAN;sp|O60268-3|K0513_HUMAN;sp|O60268-2|K0513_HUMAN	3	9	23.1	46.638	411	1345400000	205	67272000	1	1	2	3	9	10	5	19	24
OPA1	O60313-9	OPA1_HUMAN	+	cellmembrane							+																	Isoform 3 of Dynamin-like 120 kDa protein, mitochondrial OS=Homo sapiens OX=9606 GN=OPA1;Isoform 7 of Dynamin-like 120 kDa protein, mitochondrial OS=Homo sapiens OX=9606 GN=OPA1;Isoform 2 of Dynamin-like 120 kDa protein, mitochondrial OS=Homo sapiens OX=96	sp|O60313-9|OPA1_HUMAN;sp|O60313-13|OPA1_HUMAN;sp|O60313-2|OPA1_HUMAN;sp|O60313-10|OPA1_HUMAN;sp|O60313|OPA1_HUMAN;sp|O60313-11|OPA1_HUMAN	0	114.9	sp|O60313-9|OPA1_HUMAN;sp|O60313-13|OPA1_HUMAN;sp|O60313-2|OPA1_HUMAN;sp|O60313-10|OPA1_HUMAN;sp|O60313|OPA1_HUMAN;sp|O60313-11|OPA1_HUMAN	6	41	54.7	111.82	961	5653400000	913	106670000	1	1	8	9	12	12	17	24	41
ACSL4	O60488-2	ACSL4_HUMAN	+	cellmembrane			+		+		+																	Isoform Short of Long-chain-fatty-acid--CoA ligase 4 OS=Homo sapiens OX=9606 GN=ACSL4;Long-chain-fatty-acid--CoA ligase 4 OS=Homo sapiens OX=9606 GN=ACSL4 PE=1 SV=2	sp|O60488-2|ACSL4_HUMAN;sp|O60488|ACSL4_HUMAN	0	34.526	sp|O60488-2|ACSL4_HUMAN;sp|O60488|ACSL4_HUMAN	2	15	39.3	74.435	670	1620700000	238	47669000	1	1	1	1	11	11	2	22	24
DOK2	O60496	DOK2_HUMAN	+	cellpart							+																	Docking protein 2 OS=Homo sapiens OX=9606 GN=DOK2 PE=1 SV=2	sp|O60496|DOK2_HUMAN	0	27.512	sp|O60496|DOK2_HUMAN	1	13	45.9	45.378	412	1808000000	215	113000000	1	1	4	5	11	11	9	22	31
SYNCRIP	O60506-4	HNRPQ_HUMAN	+	cellpart							+																	Isoform 4 of Heterogeneous nuclear ribonucleoprotein Q OS=Homo sapiens OX=9606 GN=SYNCRIP;Isoform 3 of Heterogeneous nuclear ribonucleoprotein Q OS=Homo sapiens OX=9606 GN=SYNCRIP;Isoform 2 of Heterogeneous nuclear ribonucleoprotein Q OS=Homo sapiens OX=96	sp|O60506-4|HNRPQ_HUMAN;sp|O60506-3|HNRPQ_HUMAN;sp|O60506-2|HNRPQ_HUMAN;sp|O60506|HNRPQ_HUMAN;sp|O60506-5|HNRPQ_HUMAN	0.0015625	4.1066	sp|O60506-4|HNRPQ_HUMAN;sp|O60506-3|HNRPQ_HUMAN;sp|O60506-2|HNRPQ_HUMAN;sp|O60506|HNRPQ_HUMAN;sp|O60506-5|HNRPQ_HUMAN	5	3	8.9	58.735	527	514640000	150	18380000	1	1	4	3	11	11	7	22	29
DIAPH1	O60610-2	DIAP1_HUMAN	+	cellmembrane							+																	Isoform 2 of Protein diaphanous homolog 1 OS=Homo sapiens OX=9606 GN=DIAPH1;Isoform 3 of Protein diaphanous homolog 1 OS=Homo sapiens OX=9606 GN=DIAPH1;Protein diaphanous homolog 1 OS=Homo sapiens OX=9606 GN=DIAPH1 PE=1 SV=2	sp|O60610-2|DIAP1_HUMAN;sp|O60610-3|DIAP1_HUMAN;sp|O60610|DIAP1_HUMAN	0	323.31	sp|O60610-2|DIAP1_HUMAN;sp|O60610-3|DIAP1_HUMAN;sp|O60610|DIAP1_HUMAN	3	69	56.5	138.91	1248	47280000000	4347	775090000	1	1	12	12	12	12	24	24	48
SELENOF	O60613	SEP15_HUMAN	+	cellpart							+																	Selenoprotein F OS=Homo sapiens OX=9606 GN=SELENOF PE=1 SV=4	sp|O60613|SEP15_HUMAN	0	27.996	sp|O60613|SEP15_HUMAN;sp|O60613-2|SEP15_HUMAN	2	9	52.7	18.092	165	2098100000	314	233120000	1	1	3	4	12	12	7	24	31
PLIN3	O60664-2	PLIN3_HUMAN	+	cellmembrane		Endosome					+																	Isoform 2 of Perilipin-3 OS=Homo sapiens OX=9606 GN=PLIN3;Isoform 4 of Perilipin-3 OS=Homo sapiens OX=9606 GN=PLIN3;Perilipin-3 OS=Homo sapiens OX=9606 GN=PLIN3 PE=1 SV=3;Isoform 3 of Perilipin-3 OS=Homo sapiens OX=9606 GN=PLIN3	sp|O60664-2|PLIN3_HUMAN;sp|O60664-4|PLIN3_HUMAN;sp|O60664|PLIN3_HUMAN;sp|O60664-3|PLIN3_HUMAN	0	34.273	sp|O60664-2|PLIN3_HUMAN;sp|O60664-4|PLIN3_HUMAN;sp|O60664|PLIN3_HUMAN;sp|O60664-3|PLIN3_HUMAN	4	7	54.2	28.157	251	376590000	76	25106000	1	1	1	0	8	10	1	18	19
JAK2	O60674	JAK2_HUMAN	+	cellmembrane		focal adhesion					+																	Tyrosine-protein kinase JAK2 OS=Homo sapiens OX=9606 GN=JAK2 PE=1 SV=2	sp|O60674|JAK2_HUMAN	0.0015159	3.4913	sp|O60674|JAK2_HUMAN	1	6	10.5	130.67	1132	103240000	6	1665200	0	1	0	0	2	1	0	3	3
KPNA6	O60684	IMA7_HUMAN	+	cellpart							+																	Importin subunit alpha-7 OS=Homo sapiens OX=9606 GN=KPNA6 PE=1 SV=1;Importin subunit alpha-6 OS=Homo sapiens OX=9606 GN=KPNA5 PE=1 SV=2	sp|O60684|IMA7_HUMAN;sp|O15131|IMA6_HUMAN	0.0017271	6.3965	sp|O60684|IMA7_HUMAN;sp|O15131|IMA6_HUMAN	2	4	22	60.029	536	382670000	103	17394000	1	1	2	3	11	11	5	22	27
TPST2	O60704	TPST2_HUMAN	+	cellmembrane							+																	Protein-tyrosine sulfotransferase 2 OS=Homo sapiens OX=9606 GN=TPST2 PE=1 SV=1	sp|O60704|TPST2_HUMAN	0	33.578	sp|O60704|TPST2_HUMAN	1	7	29.2	41.911	377	1013100000	105	67539000	0	1	0	0	11	11	0	22	22
DPM1	O60762	DPM1_HUMAN	+	cellpart							+																	Dolichol-phosphate mannosyltransferase subunit 1 OS=Homo sapiens OX=9606 GN=DPM1 PE=1 SV=1	sp|O60762|DPM1_HUMAN	0.00063171	9.5916	sp|O60762|DPM1_HUMAN	1	11	46.9	29.634	260	1481400000	249	98763000	1	1	3	3	10	10	6	20	26
USO1	O60763-2	USO1_HUMAN	+	cellmembrane							+																	Isoform 2 of General vesicular transport factor p115 OS=Homo sapiens OX=9606 GN=USO1;General vesicular transport factor p115 OS=Homo sapiens OX=9606 GN=USO1 PE=1 SV=2	sp|O60763-2|USO1_HUMAN;sp|O60763|USO1_HUMAN	0	15.072	sp|O60763-2|USO1_HUMAN;sp|O60763|USO1_HUMAN	2	8	16.2	109.19	973	273010000	80	6658700	1	1	1	1	7	8	2	15	17
PRAF2	O60831	PRAF2_HUMAN	+	cellmembrane		Endosome					+																	PRA1 family protein 2 OS=Homo sapiens OX=9606 GN=PRAF2 PE=1 SV=1	sp|O60831|PRAF2_HUMAN	0.0012277	8.5509	sp|O60831|PRAF2_HUMAN	1	3	16.9	19.258	178	1300200000	180	325040000	1	1	5	5	10	10	10	20	30
DNAJA2	O60884	DNJA2_HUMAN	+	cellpart			+		+		+																	DnaJ homolog subfamily A member 2 OS=Homo sapiens OX=9606 GN=DNAJA2 PE=1 SV=1	sp|O60884|DNJA2_HUMAN	0	75.116	sp|O60884|DNJA2_HUMAN	1	12	50.7	45.745	412	2901800000	490	145090000	1	1	4	3	12	12	7	24	31
TMCC2	O75069-3	TMCC2_HUMAN	+	cellmembrane							+																	Isoform 3 of Transmembrane and coiled-coil domains protein 2 OS=Homo sapiens OX=9606 GN=TMCC2;Isoform 5 of Transmembrane and coiled-coil domains protein 2 OS=Homo sapiens OX=9606 GN=TMCC2;Isoform 2 of Transmembrane and coiled-coil domains protein 2 OS=Homo	sp|O75069-3|TMCC2_HUMAN;sp|O75069-5|TMCC2_HUMAN;sp|O75069-2|TMCC2_HUMAN;sp|O75069|TMCC2_HUMAN;sp|O75069-4|TMCC2_HUMAN	0.0016844	5.7705	sp|O75069-3|TMCC2_HUMAN;sp|O75069-5|TMCC2_HUMAN;sp|O75069-2|TMCC2_HUMAN;sp|O75069|TMCC2_HUMAN;sp|O75069-4|TMCC2_HUMAN	5	8	21.3	51.658	469	219270000	19	8770700	0	1	0	0	4	4	0	8	8
WDR1	O75083	WDR1_HUMAN	+	cellpart		Cell junction	+		+		+																	WD repeat-containing protein 1 OS=Homo sapiens OX=9606 GN=WDR1 PE=1 SV=4;Isoform 2 of WD repeat-containing protein 1 OS=Homo sapiens OX=9606 GN=WDR1	sp|O75083|WDR1_HUMAN;sp|O75083-3|WDR1_HUMAN	0	323.31	sp|O75083|WDR1_HUMAN;sp|O75083-3|WDR1_HUMAN	2	68	97	66.193	606	535720000000	11027	17281000000	1	1	12	12	12	12	24	24	48
ROCK2	O75116	ROCK2_HUMAN	+	cellpart		Endosome					+																	Rho-associated protein kinase 2 OS=Homo sapiens OX=9606 GN=ROCK2 PE=1 SV=4	sp|O75116|ROCK2_HUMAN	0	323.31	sp|O75116|ROCK2_HUMAN	1	80	61.7	160.9	1388	31708000000	2820	401360000	1	1	10	10	12	12	20	24	44
CPNE3	O75131	CPNE3_HUMAN	+	cellmembrane		Cell junction	+		+		+																	Copine-3 OS=Homo sapiens OX=9606 GN=CPNE3 PE=1 SV=1	sp|O75131|CPNE3_HUMAN	0	14.567	sp|O75131|CPNE3_HUMAN;sp|Q86YQ8-2|CPNE8_HUMAN;sp|Q9HCH3-2|CPNE5_HUMAN;sp|Q96A23|CPNE4_HUMAN;sp|Q9UBL6-2|CPNE7_HUMAN;sp|Q96A23-2|CPNE4_HUMAN;sp|Q9UBL6|CPNE7_HUMAN	7	9	23.1	60.13	537	805650000	111	30986000	1	1	0	1	9	11	1	20	21
RAB11FIP3	O75154-2	RFIP3_HUMAN	+	cellmembrane							+																	Isoform 2 of Rab11 family-interacting protein 3 OS=Homo sapiens OX=9606 GN=RAB11FIP3;Rab11 family-interacting protein 3 OS=Homo sapiens OX=9606 GN=RAB11FIP3 PE=1 SV=1;Isoform 3 of Rab11 family-interacting protein 3 OS=Homo sapiens OX=9606 GN=RAB11FIP3	sp|O75154-2|RFIP3_HUMAN;sp|O75154|RFIP3_HUMAN;sp|O75154-3|RFIP3_HUMAN	0.0033445	2.4722	sp|O75154-2|RFIP3_HUMAN;sp|O75154|RFIP3_HUMAN;sp|O75154-3|RFIP3_HUMAN	3	5	13	52.451	460	126320000	21	6648200	0	1	0	0	4	4	0	8	8
DNAJB6	O75190-3	DNJB6_HUMAN	+	cellpart							+																+	Isoform C of DnaJ homolog subfamily B member 6 OS=Homo sapiens OX=9606 GN=DNAJB6;;DnaJ homolog subfamily B member 6 OS=Homo sapiens OX=9606 GN=DNAJB6 PE=1 SV=2;;Isoform B of DnaJ homolog subfamily B member 6 OS=Homo sapiens OX=9606 GN=DNAJB6;	sp|O75190-3|DNJB6_HUMAN;CON__sp|O75190-3|DNJB6_HUMAN;sp|O75190|DNJB6_HUMAN;CON__sp|O75190|DNJB6_HUMAN;sp|O75190-2|DNJB6_HUMAN;CON__sp|O75190-2|DNJB6_HUMAN	0.0017153	6.2562	sp|O75190-3|DNJB6_HUMAN;CON__sp|O75190-3|DNJB6_HUMAN;sp|O75190|DNJB6_HUMAN;CON__sp|O75190|DNJB6_HUMAN;sp|O75190-2|DNJB6_HUMAN;CON__sp|O75190-2|DNJB6_HUMAN;sp|Q8WWF6|DNJB3_HUMAN;sp|O75190-4|DNJB6_HUMAN;sp|Q7Z6W7|DNJB7_HUMAN;sp|Q8NHS0|DNJB8_HUMAN	10	7	23.7	35.714	325	385140000	93	27510000	0	1	0	0	8	10	0	18	18
NDUFS7	O75251	NDUS7_HUMAN	+	cellpart							+																	NADH dehydrogenase [ubiquinone] iron-sulfur protein 7, mitochondrial OS=Homo sapiens OX=9606 GN=NDUFS7 PE=1 SV=3;Isoform 2 of NADH dehydrogenase [ubiquinone] iron-sulfur protein 7, mitochondrial OS=Homo sapiens OX=9606 GN=NDUFS7	sp|O75251|NDUS7_HUMAN;sp|O75251-2|NDUS7_HUMAN	0	88.37	sp|O75251|NDUS7_HUMAN;sp|O75251-2|NDUS7_HUMAN	2	4	34.7	23.563	213	539280000	80	49025000	0	1	0	0	9	9	0	18	18
RTN2	O75298-3	RTN2_HUMAN	+	cellmembrane							+																	Isoform RTN2-C of Reticulon-2 OS=Homo sapiens OX=9606 GN=RTN2;Reticulon-2 OS=Homo sapiens OX=9606 GN=RTN2 PE=1 SV=1;Isoform RTN2-B of Reticulon-2 OS=Homo sapiens OX=9606 GN=RTN2	sp|O75298-3|RTN2_HUMAN;sp|O75298|RTN2_HUMAN;sp|O75298-2|RTN2_HUMAN	0	23.214	sp|O75298-3|RTN2_HUMAN;sp|O75298|RTN2_HUMAN;sp|O75298-2|RTN2_HUMAN	3	5	28.8	22.316	205	984940000	171	123120000	1	1	3	2	11	11	5	22	27
NDUFS2	O75306	NDUS2_HUMAN	+	cellmembrane							+																	NADH dehydrogenase [ubiquinone] iron-sulfur protein 2, mitochondrial OS=Homo sapiens OX=9606 GN=NDUFS2 PE=1 SV=2;Isoform 2 of NADH dehydrogenase [ubiquinone] iron-sulfur protein 2, mitochondrial OS=Homo sapiens OX=9606 GN=NDUFS2	sp|O75306|NDUS2_HUMAN;sp|O75306-2|NDUS2_HUMAN	0	13.118	sp|O75306|NDUS2_HUMAN;sp|O75306-2|NDUS2_HUMAN	2	11	39.5	52.545	463	299730000	36	11989000	0	1	0	0	6	6	0	12	12
NIPSNAP2	O75323	NIPS2_HUMAN	+	cellpart							+																	Protein NipSnap homolog 2 OS=Homo sapiens OX=9606 GN=NIPSNAP2 PE=1 SV=1;Isoform 2 of Protein NipSnap homolog 2 OS=Homo sapiens OX=9606 GN=NIPSNAP2	sp|O75323|NIPS2_HUMAN;sp|O75323-2|NIPS2_HUMAN	0	15.325	sp|O75323|NIPS2_HUMAN;sp|O75323-2|NIPS2_HUMAN	2	8	42	33.742	286	726150000	90	48410000	0	1	0	0	5	5	0	10	10
PDCD6	O75340	PDCD6_HUMAN	+	cellmembrane		Endosome	+		+		+																	Programmed cell death protein 6 OS=Homo sapiens OX=9606 GN=PDCD6 PE=1 SV=1;Isoform 2 of Programmed cell death protein 6 OS=Homo sapiens OX=9606 GN=PDCD6	sp|O75340|PDCD6_HUMAN;sp|O75340-2|PDCD6_HUMAN	0.0012453	9.2022	sp|O75340|PDCD6_HUMAN;sp|O75340-2|PDCD6_HUMAN;sp|O75340-3|PDCD6_HUMAN	3	6	49.2	21.868	191	750630000	115	83403000	1	1	2	3	8	10	5	18	23
TBCA	O75347	TBCA_HUMAN	+	cellpart							+																	Tubulin-specific chaperone A OS=Homo sapiens OX=9606 GN=TBCA PE=1 SV=3;Isoform 2 of Tubulin-specific chaperone A OS=Homo sapiens OX=9606 GN=TBCA	sp|O75347|TBCA_HUMAN;sp|O75347-2|TBCA_HUMAN	0	33.85	sp|O75347|TBCA_HUMAN;sp|O75347-2|TBCA_HUMAN	2	7	47.2	12.855	108	11836000000	462	1972700000	1	1	12	12	12	12	24	24	48
ATP6V1G1	O75348	VATG1_HUMAN	+	cellmembrane			+		+		+																	V-type proton ATPase subunit G 1 OS=Homo sapiens OX=9606 GN=ATP6V1G1 PE=1 SV=3	sp|O75348|VATG1_HUMAN	0	274.8	sp|O75348|VATG1_HUMAN;sp|O95670-2|VATG2_HUMAN;sp|O95670|VATG2_HUMAN	3	7	66.9	13.757	118	1677100000	207	279520000	1	1	4	3	11	11	7	22	29
VPS4B	O75351	VPS4B_HUMAN	+	cellmembrane		Endosome	+		+		+																	Vacuolar protein sorting-associated protein 4B OS=Homo sapiens OX=9606 GN=VPS4B PE=1 SV=2	sp|O75351|VPS4B_HUMAN	0.0016968	6.001	sp|O75351|VPS4B_HUMAN	1	4	23.4	49.301	444	345780000	45	13831000	1	1	0	1	5	8	1	13	14
MPDU1	O75352-2	MPU1_HUMAN	+	cellmembrane							+																	Isoform 2 of Mannose-P-dolichol utilization defect 1 protein OS=Homo sapiens OX=9606 GN=MPDU1;Mannose-P-dolichol utilization defect 1 protein OS=Homo sapiens OX=9606 GN=MPDU1 PE=1 SV=2	sp|O75352-2|MPU1_HUMAN;sp|O75352|MPU1_HUMAN	0.0016155	4.7409	sp|O75352-2|MPU1_HUMAN;sp|O75352|MPU1_HUMAN	2	4	28	19.752	186	757660000	87	189420000	1	1	0	1	7	7	1	14	15
SH3BGRL	O75368	SH3L1_HUMAN	+	cellpart			+		+		+																	SH3 domain-binding glutamic acid-rich-like protein OS=Homo sapiens OX=9606 GN=SH3BGRL PE=1 SV=1	sp|O75368|SH3L1_HUMAN	0	21.271	sp|O75368|SH3L1_HUMAN	1	8	71.1	12.774	114	2996000000	346	428000000	1	1	5	5	12	12	10	24	34
FLNB	O75369-6	FLNB_HUMAN	+	cellpart		focal adhesion	+		+		+																	Isoform 6 of Filamin-B OS=Homo sapiens OX=9606 GN=FLNB;Isoform 3 of Filamin-B OS=Homo sapiens OX=9606 GN=FLNB;Isoform 2 of Filamin-B OS=Homo sapiens OX=9606 GN=FLNB;Isoform 9 of Filamin-B OS=Homo sapiens OX=9606 GN=FLNB;Filamin-B OS=Homo sapiens OX=9606 GN	sp|O75369-6|FLNB_HUMAN;sp|O75369-3|FLNB_HUMAN;sp|O75369-2|FLNB_HUMAN;sp|O75369-9|FLNB_HUMAN;sp|O75369|FLNB_HUMAN;sp|O75369-8|FLNB_HUMAN;sp|O75369-5|FLNB_HUMAN;sp|O75369-4|FLNB_HUMAN	0.0019627	2.8997	sp|O75369-6|FLNB_HUMAN;sp|O75369-3|FLNB_HUMAN;sp|O75369-2|FLNB_HUMAN;sp|O75369-9|FLNB_HUMAN;sp|O75369|FLNB_HUMAN;sp|O75369-8|FLNB_HUMAN;sp|O75369-5|FLNB_HUMAN;sp|O75369-4|FLNB_HUMAN;sp|O75369-7|FLNB_HUMAN	9	8	9.9	271.41	2537	3162400000	54	23958000	1	1	1	1	9	9	2	18	20
NDUFS6	O75380	NDUS6_HUMAN	+	cellmembrane							+																	NADH dehydrogenase [ubiquinone] iron-sulfur protein 6, mitochondrial OS=Homo sapiens OX=9606 GN=NDUFS6 PE=1 SV=1	sp|O75380|NDUS6_HUMAN	0	45.998	sp|O75380|NDUS6_HUMAN	1	8	66.9	13.711	124	5726500000	487	715820000	1	1	9	10	12	12	19	24	43
CS	O75390	CISY_HUMAN	+	cellpart			+		+		+																	Citrate synthase, mitochondrial OS=Homo sapiens OX=9606 GN=CS PE=1 SV=2	sp|O75390|CISY_HUMAN	0	247.46	sp|O75390|CISY_HUMAN	1	26	59.9	51.712	466	40432000000	2216	2128000000	1	1	10	12	12	12	22	24	46
SEC22B	O75396	SC22B_HUMAN	+	cellmembrane							+																	Vesicle-trafficking protein SEC22b OS=Homo sapiens OX=9606 GN=SEC22B PE=1 SV=4	sp|O75396|SC22B_HUMAN	0	65.054	sp|O75396|SC22B_HUMAN	1	9	43.3	24.593	215	3296000000	445	235430000	1	1	4	4	11	11	8	22	30
TACC1	O75410-5	TACC1_HUMAN	+	cellpart							+																	Isoform 5 of Transforming acidic coiled-coil-containing protein 1 OS=Homo sapiens OX=9606 GN=TACC1	sp|O75410-5|TACC1_HUMAN	0.0012158	8.0954	sp|O75410-5|TACC1_HUMAN	1	8	32.7	40.902	367	245110000	48	10213000	0	1	0	0	7	8	0	15	15
LRCH4	O75427	LRCH4_HUMAN	+	cellpart							+																	Leucine-rich repeat and calponin homology domain-containing protein 4 OS=Homo sapiens OX=9606 GN=LRCH4 PE=1 SV=2	sp|O75427|LRCH4_HUMAN	0.0006435	10.217	sp|O75427|LRCH4_HUMAN	1	2	7.6	73.449	683	91718000	21	2958600	0	1	0	0	2	1	0	3	3
MTX2	O75431-2	MTX2_HUMAN	+	cellpart							+																	Isoform 2 of Metaxin-2 OS=Homo sapiens OX=9606 GN=MTX2;Metaxin-2 OS=Homo sapiens OX=9606 GN=MTX2 PE=1 SV=1	sp|O75431-2|MTX2_HUMAN;sp|O75431|MTX2_HUMAN	0.00063735	9.8781	sp|O75431-2|MTX2_HUMAN;sp|O75431|MTX2_HUMAN	2	4	38.7	28.823	253	296980000	79	26998000	0	1	0	0	5	6	0	11	11
NDUFB1	O75438	NDUB1_HUMAN	+	cellmembrane							+																	NADH dehydrogenase [ubiquinone] 1 beta subcomplex subunit 1 OS=Homo sapiens OX=9606 GN=NDUFB1 PE=1 SV=1;Isoform 2 of NADH dehydrogenase [ubiquinone] 1 beta subcomplex subunit 1 OS=Homo sapiens OX=9606 GN=NDUFB1	sp|O75438|NDUB1_HUMAN;sp|O75438-2|NDUB1_HUMAN	0	18.213	sp|O75438|NDUB1_HUMAN;sp|O75438-2|NDUB1_HUMAN	2	6	70.7	6.9611	58	646140000	62	215380000	0	1	0	0	9	9	0	18	18
PMPCB	O75439	MPPB_HUMAN	+	cellpart							+																	Mitochondrial-processing peptidase subunit beta OS=Homo sapiens OX=9606 GN=PMPCB PE=1 SV=2	sp|O75439|MPPB_HUMAN	0.0017231	6.3651	sp|O75439|MPPB_HUMAN	1	2	10.2	54.366	489	19760000	4	760010	0	0	0	0	0	0	0	0	0
ERLIN1	O75477	ERLN1_HUMAN	+	cellmembrane							+																	Erlin-1 OS=Homo sapiens OX=9606 GN=ERLIN1 PE=1 SV=2	sp|O75477|ERLN1_HUMAN	0.0017036	6.1495	sp|O75477|ERLN1_HUMAN	1	3	18.4	39.171	348	304880000	47	15244000	0	1	0	0	5	6	0	11	11
NDUFS3	O75489	NDUS3_HUMAN	+	cellpart							+																	NADH dehydrogenase [ubiquinone] iron-sulfur protein 3, mitochondrial OS=Homo sapiens OX=9606 GN=NDUFS3 PE=1 SV=1	sp|O75489|NDUS3_HUMAN	0.0012143	8.0712	sp|O75489|NDUS3_HUMAN;sp|O75489-2|NDUS3_HUMAN	2	7	28.4	30.241	264	388250000	46	22838000	1	1	1	1	7	7	2	14	16
ECI2	O75521-2	ECI2_HUMAN	+	cellpart																								Isoform 2 of Enoyl-CoA delta isomerase 2, mitochondrial OS=Homo sapiens OX=9606 GN=ECI2;Enoyl-CoA delta isomerase 2, mitochondrial OS=Homo sapiens OX=9606 GN=ECI2 PE=1 SV=4	sp|O75521-2|ECI2_HUMAN;sp|O75521|ECI2_HUMAN	0	16.44	sp|O75521-2|ECI2_HUMAN;sp|O75521|ECI2_HUMAN	2	9	36.8	39.609	359	287660000	32	19177000	0	1	0	0	5	6	0	11	11
BANF1	O75531	BAF_HUMAN	+	cellpart							+																	Barrier-to-autointegration factor OS=Homo sapiens OX=9606 GN=BANF1 PE=1 SV=1	sp|O75531|BAF_HUMAN	0.0017321	6.5134	sp|O75531|BAF_HUMAN	1	2	29.2	10.058	89	547150000	53	109430000	1	1	0	1	11	11	1	22	23
STX11	O75558	STX11_HUMAN	+	cellmembrane							+																	Syntaxin-11 OS=Homo sapiens OX=9606 GN=STX11 PE=1 SV=1	sp|O75558|STX11_HUMAN	0	323.31	sp|O75558|STX11_HUMAN	1	25	69	33.195	287	62079000000	3545	3879900000	1	1	11	12	12	12	23	24	47
SKAP2	O75563	SKAP2_HUMAN	+	cellpart							+																	Src kinase-associated phosphoprotein 2 OS=Homo sapiens OX=9606 GN=SKAP2 PE=1 SV=1	sp|O75563|SKAP2_HUMAN	0	78.76	sp|O75563|SKAP2_HUMAN	1	21	59.6	41.216	359	5605000000	586	311390000	1	1	7	7	11	11	14	22	36
MYCBP2	O75592-2	MYCB2_HUMAN	+	cellpart							+																	Isoform 2 of E3 ubiquitin-protein ligase MYCBP2 OS=Homo sapiens OX=9606 GN=MYCBP2;E3 ubiquitin-protein ligase MYCBP2 OS=Homo sapiens OX=9606 GN=MYCBP2 PE=1 SV=4	sp|O75592-2|MYCB2_HUMAN;sp|O75592|MYCB2_HUMAN	0.0042755	2.4008	sp|O75592-2|MYCB2_HUMAN;sp|O75592|MYCB2_HUMAN	2	6	2.4	513.25	4675	50659000	9	233450	0	1	0	0	0	1	0	1	1
PGLYRP1	O75594	PGRP1_HUMAN	+	cellsurface			+		+																			Peptidoglycan recognition protein 1 OS=Homo sapiens OX=9606 GN=PGLYRP1 PE=1 SV=1	sp|O75594|PGRP1_HUMAN	0.0015593	4.0785	sp|O75594|PGRP1_HUMAN	1	2	19.4	21.731	196	44597000	4	4459700	1	1	0	1	1	1	1	2	3
LYPLA1	O75608	LYPA1_HUMAN	+	cellpart			+		+		+																	Acyl-protein thioesterase 1 OS=Homo sapiens OX=9606 GN=LYPLA1 PE=1 SV=1;Isoform 2 of Acyl-protein thioesterase 1 OS=Homo sapiens OX=9606 GN=LYPLA1	sp|O75608|LYPA1_HUMAN;sp|O75608-2|LYPA1_HUMAN	0	90.418	sp|O75608|LYPA1_HUMAN;sp|O75608-2|LYPA1_HUMAN	2	10	75.7	24.669	230	2866700000	475	260610000	1	1	3	4	12	12	7	24	31
FCN3	O75636-2	FCN3_HUMAN	+	cellsurface				+		+																		Isoform 2 of Ficolin-3 OS=Homo sapiens OX=9606 GN=FCN3;Ficolin-3 OS=Homo sapiens OX=9606 GN=FCN3 PE=1 SV=2	sp|O75636-2|FCN3_HUMAN;sp|O75636|FCN3_HUMAN	0	21.436	sp|O75636-2|FCN3_HUMAN;sp|O75636|FCN3_HUMAN	2	5	35.8	31.677	288	2259000000	188	161360000	1	1	11	11	11	11	22	22	44
TIPRL	O75663	TIPRL_HUMAN	+	cellpart							+																	TIP41-like protein OS=Homo sapiens OX=9606 GN=TIPRL PE=1 SV=2;Isoform 2 of TIP41-like protein OS=Homo sapiens OX=9606 GN=TIPRL	sp|O75663|TIPRL_HUMAN;sp|O75663-2|TIPRL_HUMAN	0.0056101	2.1714	sp|O75663|TIPRL_HUMAN;sp|O75663-2|TIPRL_HUMAN	2	3	23.2	31.444	272	14861000	4	928790	0	0	0	0	0	0	0	0	0
OFD1	O75665	OFD1_HUMAN	+	cellpart																								Oral-facial-digital syndrome 1 protein OS=Homo sapiens OX=9606 GN=OFD1 PE=1 SV=1;Isoform 3 of Oral-facial-digital syndrome 1 protein OS=Homo sapiens OX=9606 GN=OFD1	sp|O75665|OFD1_HUMAN;sp|O75665-3|OFD1_HUMAN	0.0015496	3.9456	sp|O75665|OFD1_HUMAN;sp|O75665-3|OFD1_HUMAN;sp|O75665-2|OFD1_HUMAN	3	4	3.9	116.67	1012	2900600000	42	50009000	1	1	2	3	6	5	5	11	16
PPM1B	O75688	PPM1B_HUMAN	+	cellpart							+																	Protein phosphatase 1B OS=Homo sapiens OX=9606 GN=PPM1B PE=1 SV=1;Isoform 5 of Protein phosphatase 1B OS=Homo sapiens OX=9606 GN=PPM1B;Isoform 4 of Protein phosphatase 1B OS=Homo sapiens OX=9606 GN=PPM1B;Isoform Beta-2 of Protein phosphatase 1B OS=Homo sap	sp|O75688|PPM1B_HUMAN;sp|O75688-5|PPM1B_HUMAN;sp|O75688-4|PPM1B_HUMAN;sp|O75688-2|PPM1B_HUMAN	0.0015221	3.5466	sp|O75688|PPM1B_HUMAN;sp|O75688-5|PPM1B_HUMAN;sp|O75688-4|PPM1B_HUMAN;sp|O75688-2|PPM1B_HUMAN;sp|O75688-3|PPM1B_HUMAN	5	2	12.7	52.642	479	21535000	8	978840	0	1	0	0	1	1	0	2	2
RP2	O75695	XRP2_HUMAN	+	cellmembrane			+		+		+																	Protein XRP2 OS=Homo sapiens OX=9606 GN=RP2 PE=1 SV=4	sp|O75695|XRP2_HUMAN	0.00065574	11.089	sp|O75695|XRP2_HUMAN	1	8	43.1	39.641	350	342070000	30	21379000	0	1	0	0	4	4	0	8	8
SLC25A12	O75746	CMC1_HUMAN	+	cellmembrane							+																	Calcium-binding mitochondrial carrier protein Aralar1 OS=Homo sapiens OX=9606 GN=SLC25A12 PE=1 SV=2;Isoform 2 of Calcium-binding mitochondrial carrier protein Aralar1 OS=Homo sapiens OX=9606 GN=SLC25A12	sp|O75746|CMC1_HUMAN;sp|O75746-2|CMC1_HUMAN	0.0015167	3.4921	sp|O75746|CMC1_HUMAN;sp|O75746-2|CMC1_HUMAN	2	3	8.4	74.761	678	82563000	17	2358900	0	1	0	0	3	5	0	8	8
TRPA1	O75762	TRPA1_HUMAN	+	cellmembrane																								Transient receptor potential cation channel subfamily A member 1 OS=Homo sapiens OX=9606 GN=TRPA1 PE=1 SV=3	sp|O75762|TRPA1_HUMAN	0.0015068	3.4424	sp|O75762|TRPA1_HUMAN	1	4	7.8	127.5	1119	6340000000	36	119620000	0	1	0	0	5	4	0	9	9
ATP6AP2	O75787-2	RENR_HUMAN	+	cellmembrane			+		+		+																	Isoform 2 of Renin receptor OS=Homo sapiens OX=9606 GN=ATP6AP2;Renin receptor OS=Homo sapiens OX=9606 GN=ATP6AP2 PE=1 SV=2	sp|O75787-2|RENR_HUMAN;sp|O75787|RENR_HUMAN	0.0017162	6.2654	sp|O75787-2|RENR_HUMAN;sp|O75787|RENR_HUMAN	2	4	18.6	35.612	318	130890000	19	8180800	1	1	3	4	1	0	7	1	8
GRAP2	O75791	GRAP2_HUMAN	+	cellpart		Endosome					+																	GRB2-related adapter protein 2 OS=Homo sapiens OX=9606 GN=GRAP2 PE=1 SV=1;Isoform 2 of GRB2-related adapter protein 2 OS=Homo sapiens OX=9606 GN=GRAP2	sp|O75791|GRAP2_HUMAN;sp|O75791-2|GRAP2_HUMAN	0.0015504	3.9463	sp|O75791|GRAP2_HUMAN;sp|O75791-2|GRAP2_HUMAN	2	5	25.5	37.909	330	122530000	49	8169000	0	1	0	0	11	11	0	22	22
ZMPSTE24	O75844	FACE1_HUMAN	+	cellmembrane			+		+		+																	CAAX prenyl protease 1 homolog OS=Homo sapiens OX=9606 GN=ZMPSTE24 PE=1 SV=2	sp|O75844|FACE1_HUMAN	0	92.923	sp|O75844|FACE1_HUMAN	1	18	35.6	54.812	475	7694600000	670	404980000	1	1	7	7	12	12	14	24	38
IDH1	O75874	IDHC_HUMAN	+	cellpart			+		+		+																	Isocitrate dehydrogenase [NADP] cytoplasmic OS=Homo sapiens OX=9606 GN=IDH1 PE=1 SV=2	sp|O75874|IDHC_HUMAN	0	123.44	sp|O75874|IDHC_HUMAN	1	16	60.1	46.659	414	6046800000	841	241870000	1	1	10	11	12	12	21	24	45
ARL6IP5	O75915	PRAF3_HUMAN	+	cellmembrane							+																	PRA1 family protein 3 OS=Homo sapiens OX=9606 GN=ARL6IP5 PE=1 SV=1	sp|O75915|PRAF3_HUMAN	0	323.31	sp|O75915|PRAF3_HUMAN	1	12	34	21.614	188	57310000000	2645	9551700000	1	1	12	12	12	12	24	24	48
DYSF	O75923-15	DYSF_HUMAN	+	cellmembrane			+		+																			Isoform 15 of Dysferlin OS=Homo sapiens OX=9606 GN=DYSF;Isoform 3 of Dysferlin OS=Homo sapiens OX=9606 GN=DYSF;Isoform 9 of Dysferlin OS=Homo sapiens OX=9606 GN=DYSF;Dysferlin OS=Homo sapiens OX=9606 GN=DYSF PE=1 SV=1;Isoform 14 of Dysferlin OS=Homo sapien	sp|O75923-15|DYSF_HUMAN;sp|O75923-3|DYSF_HUMAN;sp|O75923-9|DYSF_HUMAN;sp|O75923|DYSF_HUMAN;sp|O75923-14|DYSF_HUMAN;sp|O75923-6|DYSF_HUMAN;sp|O75923-12|DYSF_HUMAN;sp|O75923-5|DYSF_HUMAN;sp|O75923-11|DYSF_HUMAN;sp|O75923-4|DYSF_HUMAN;sp|O75923-10|DYSF_HUMAN;sp|O75923-2|DYSF_HUMAN;sp|O75923-8|DYSF_HUMAN;sp|O75923-7|DYSF_HUMAN;sp|O75923-13|DYSF_HUMAN	0.0015552	4.0076	sp|O75923-15|DYSF_HUMAN;sp|O75923-3|DYSF_HUMAN;sp|O75923-9|DYSF_HUMAN;sp|O75923|DYSF_HUMAN;sp|O75923-14|DYSF_HUMAN;sp|O75923-6|DYSF_HUMAN;sp|O75923-12|DYSF_HUMAN;sp|O75923-5|DYSF_HUMAN;sp|O75923-11|DYSF_HUMAN;sp|O75923-4|DYSF_HUMAN;sp|O75923-10|DYSF_HUMAN;sp|O75923-2|DYSF_HUMAN;sp|O75923-8|DYSF_HUMAN;sp|O75923-7|DYSF_HUMAN;sp|O75923-13|DYSF_HUMAN	15	4	3.7	222.31	1954	423780000	18	4556700	1	0	1	2	0	0	3	0	3
DCTN3	O75935-3	DCTN3_HUMAN	+	cellpart							+																	Isoform 3 of Dynactin subunit 3 OS=Homo sapiens OX=9606 GN=DCTN3;Dynactin subunit 3 OS=Homo sapiens OX=9606 GN=DCTN3 PE=1 SV=1	sp|O75935-3|DCTN3_HUMAN;sp|O75935|DCTN3_HUMAN	0	44.075	sp|O75935-3|DCTN3_HUMAN;sp|O75935|DCTN3_HUMAN	2	2	27.2	18.001	158	243330000	43	22121000	0	1	0	0	3	4	0	7	7
ATP5PD	O75947	ATP5H_HUMAN	+	cellpart							+																	ATP synthase subunit d, mitochondrial OS=Homo sapiens OX=9606 GN=ATP5PD PE=1 SV=3;Isoform 2 of ATP synthase subunit d, mitochondrial OS=Homo sapiens OX=9606 GN=ATP5PD	sp|O75947|ATP5H_HUMAN;sp|O75947-2|ATP5H_HUMAN	0	89.795	sp|O75947|ATP5H_HUMAN;sp|O75947-2|ATP5H_HUMAN	2	22	98.8	18.491	161	20091000000	1332	2009100000	1	1	10	11	12	12	21	24	45
FLOT1	O75955	FLOT1_HUMAN	+	cellmembrane		Endosome	+		+		+																	Flotillin-1 OS=Homo sapiens OX=9606 GN=FLOT1 PE=1 SV=3;Isoform 2 of Flotillin-1 OS=Homo sapiens OX=9606 GN=FLOT1	sp|O75955|FLOT1_HUMAN;sp|O75955-2|FLOT1_HUMAN	0	204.16	sp|O75955|FLOT1_HUMAN;sp|O75955-2|FLOT1_HUMAN	2	30	77	47.355	427	19241000000	2086	687170000	1	1	11	11	11	11	22	22	44
ATP5MG	O75964	ATP5L_HUMAN	+	cellpart							+																	ATP synthase subunit g, mitochondrial OS=Homo sapiens OX=9606 GN=ATP5MG PE=1 SV=3	sp|O75964|ATP5L_HUMAN	0	47.896	sp|O75964|ATP5L_HUMAN	1	7	64.1	11.428	103	4638200000	384	773040000	1	1	9	8	11	11	17	22	39
GLRX3	O76003	GLRX3_HUMAN	+	cellpart							+																	Glutaredoxin-3 OS=Homo sapiens OX=9606 GN=GLRX3 PE=1 SV=2	sp|O76003|GLRX3_HUMAN	0	48.447	sp|O76003|GLRX3_HUMAN	1	8	42.1	37.432	335	936890000	120	52050000	1	1	2	1	12	12	3	24	27
KRT34	O76011	KRT34_HUMAN	+	cellpart																							+	Keratin, type I cuticular Ha4 OS=Homo sapiens OX=9606 GN=KRT34 PE=1 SV=2;	sp|O76011|KRT34_HUMAN;CON__sp|O76011|KRT34_HUMAN	0	100.45	sp|O76011|KRT34_HUMAN;CON__sp|O76011|KRT34_HUMAN	2	11	54.1	49.423	436	498460000	30	21672000	1	0	2	1	0	0	3	0	3
KRT36	O76013-2	KRT36_HUMAN	+	cellpart			+		+																		+	Isoform 2 of Keratin, type I cuticular Ha6 OS=Homo sapiens OX=9606 GN=KRT36;;Keratin, type I cuticular Ha6 OS=Homo sapiens OX=9606 GN=KRT36 PE=2 SV=1;	sp|O76013-2|KRT36_HUMAN;CON__sp|O76013-2|KRT36_HUMAN;sp|O76013|KRT36_HUMAN;CON__sp|O76013|KRT36_HUMAN	0	42.924	sp|O76013-2|KRT36_HUMAN;CON__sp|O76013-2|KRT36_HUMAN;sp|O76013|KRT36_HUMAN;CON__sp|O76013|KRT36_HUMAN	4	6	21.1	47.484	417	2858200000	23	114330000	1	0	1	1	0	0	2	0	2
PDE5A	O76074-2	PDE5A_HUMAN	+	cellpart							+																	Isoform PDE5A2 of cGMP-specific 3,5-cyclic phosphodiesterase OS=Homo sapiens OX=9606 GN=PDE5A;cGMP-specific 3,5-cyclic phosphodiesterase OS=Homo sapiens OX=9606 GN=PDE5A PE=1 SV=2	sp|O76074-2|PDE5A_HUMAN;sp|O76074|PDE5A_HUMAN	0	323.31	sp|O76074-2|PDE5A_HUMAN;sp|O76074|PDE5A_HUMAN	2	53	67.9	94.804	833	19866000000	2076	422690000	1	1	9	10	12	11	19	23	42
STK10	O94804	STK10_HUMAN	+	cellmembrane			+		+		+																	Serine/threonine-protein kinase 10 OS=Homo sapiens OX=9606 GN=STK10 PE=1 SV=1	sp|O94804|STK10_HUMAN	0	49.071	sp|O94804|STK10_HUMAN	1	13	16.5	112.13	968	1189500000	182	26433000	1	1	7	8	9	10	15	19	34
TOMM70	O94826	TOM70_HUMAN	+	cellmembrane			+		+		+																	Mitochondrial import receptor subunit TOM70 OS=Homo sapiens OX=9606 GN=TOMM70 PE=1 SV=1	sp|O94826|TOM70_HUMAN	0	90.627	sp|O94826|TOM70_HUMAN	1	28	62	67.454	608	8528200000	817	266500000	1	1	10	10	12	12	20	24	44
TMEM63A	O94886	CSCL1_HUMAN	+	cellmembrane			+		+																			CSC1-like protein 1 OS=Homo sapiens OX=9606 GN=TMEM63A PE=1 SV=3	sp|O94886|CSCL1_HUMAN	0	37.844	sp|O94886|CSCL1_HUMAN	1	12	20	92.125	807	4935200000	437	164510000	1	1	4	5	11	11	9	22	31
ERLIN2	O94905	ERLN2_HUMAN	+	cellmembrane							+																	Erlin-2 OS=Homo sapiens OX=9606 GN=ERLIN2 PE=1 SV=1	sp|O94905|ERLN2_HUMAN	0	12.652	sp|O94905|ERLN2_HUMAN;sp|O94905-2|ERLN2_HUMAN;sp|O94905-3|ERLN2_HUMAN	3	14	47.8	37.839	339	1524700000	196	72602000	1	1	4	4	10	10	8	20	28
FRYL	O94915	FRYL_HUMAN	+	cellpart							+																	Protein furry homolog-like OS=Homo sapiens OX=9606 GN=FRYL PE=1 SV=2	sp|O94915|FRYL_HUMAN	0.0014918	3.2435	sp|O94915|FRYL_HUMAN	1	8	6.9	339.59	3013	165240000	12	1233100	0	1	0	0	1	1	0	2	2
ENDOD1	O94919	ENDD1_HUMAN	+	cellsurface			+		+		+																	Endonuclease domain-containing 1 protein OS=Homo sapiens OX=9606 GN=ENDOD1 PE=1 SV=2	sp|O94919|ENDD1_HUMAN	0	323.31	sp|O94919|ENDD1_HUMAN	1	25	58.6	55.016	500	108870000000	3588	4536200000	1	1	12	12	12	12	24	24	48
GLS	O94925-3	GLSK_HUMAN	+	cellpart							+																	Isoform 3 of Glutaminase kidney isoform, mitochondrial OS=Homo sapiens OX=9606 GN=GLS	sp|O94925-3|GLSK_HUMAN	0	84.77	sp|O94925-3|GLSK_HUMAN	1	19	53.8	65.459	598	2813700000	372	93791000	1	1	2	2	11	11	4	22	26
ABLIM3	O94929-3	ABLM3_HUMAN	+	cellpart							+																	Isoform 3 of Actin-binding LIM protein 3 OS=Homo sapiens OX=9606 GN=ABLIM3;Actin-binding LIM protein 3 OS=Homo sapiens OX=9606 GN=ABLIM3 PE=1 SV=3;Isoform 2 of Actin-binding LIM protein 3 OS=Homo sapiens OX=9606 GN=ABLIM3	sp|O94929-3|ABLM3_HUMAN;sp|O94929|ABLM3_HUMAN;sp|O94929-2|ABLM3_HUMAN	0.0016732	5.6637	sp|O94929-3|ABLM3_HUMAN;sp|O94929|ABLM3_HUMAN;sp|O94929-2|ABLM3_HUMAN;sp|O94929-4|ABLM3_HUMAN	4	5	15	67.072	588	162660000	37	4647500	1	1	1	0	5	5	1	10	11
AP2A2	O94973-2	AP2A2_HUMAN	+	cellmembrane							+																	Isoform 2 of AP-2 complex subunit alpha-2 OS=Homo sapiens OX=9606 GN=AP2A2;AP-2 complex subunit alpha-2 OS=Homo sapiens OX=9606 GN=AP2A2 PE=1 SV=2;Isoform 3 of AP-2 complex subunit alpha-2 OS=Homo sapiens OX=9606 GN=AP2A2	sp|O94973-2|AP2A2_HUMAN;sp|O94973|AP2A2_HUMAN;sp|O94973-3|AP2A2_HUMAN	0.0017241	6.3709	sp|O94973-2|AP2A2_HUMAN;sp|O94973|AP2A2_HUMAN;sp|O94973-3|AP2A2_HUMAN	3	4	16.5	104.09	940	136270000	31	2899300	1	1	1	2	5	7	3	12	15
SEC31A	O94979-6	SC31A_HUMAN	+	cellmembrane							+																	Isoform 6 of Protein transport protein Sec31A OS=Homo sapiens OX=9606 GN=SEC31A;Isoform 3 of Protein transport protein Sec31A OS=Homo sapiens OX=9606 GN=SEC31A;Isoform 10 of Protein transport protein Sec31A OS=Homo sapiens OX=9606 GN=SEC31A;Isoform 4 of Pr	sp|O94979-6|SC31A_HUMAN;sp|O94979-3|SC31A_HUMAN;sp|O94979-10|SC31A_HUMAN;sp|O94979-4|SC31A_HUMAN;sp|O94979-9|SC31A_HUMAN;sp|O94979-2|SC31A_HUMAN;sp|O94979|SC31A_HUMAN;sp|O94979-8|SC31A_HUMAN;sp|O94979-7|SC31A_HUMAN;sp|O94979-5|SC31A_HUMAN	0	15.357	sp|O94979-6|SC31A_HUMAN;sp|O94979-3|SC31A_HUMAN;sp|O94979-10|SC31A_HUMAN;sp|O94979-4|SC31A_HUMAN;sp|O94979-9|SC31A_HUMAN;sp|O94979-2|SC31A_HUMAN;sp|O94979|SC31A_HUMAN;sp|O94979-8|SC31A_HUMAN;sp|O94979-7|SC31A_HUMAN;sp|O94979-5|SC31A_HUMAN	10	8	12	117.67	1067	181690000	51	4431500	0	1	0	0	6	6	0	12	12
CEP152	O94986-3	CE152_HUMAN	+	cellpart																								Isoform 3 of Centrosomal protein of 152 kDa OS=Homo sapiens OX=9606 GN=CEP152;Centrosomal protein of 152 kDa OS=Homo sapiens OX=9606 GN=CEP152 PE=1 SV=4;Isoform 1 of Centrosomal protein of 152 kDa OS=Homo sapiens OX=9606 GN=CEP152;Isoform 2 of Centrosomal	sp|O94986-3|CE152_HUMAN;sp|O94986|CE152_HUMAN;sp|O94986-1|CE152_HUMAN;sp|O94986-2|CE152_HUMAN	0.0019222	2.567	sp|O94986-3|CE152_HUMAN;sp|O94986|CE152_HUMAN;sp|O94986-1|CE152_HUMAN;sp|O94986-2|CE152_HUMAN	4	6	6	189.07	1654	1853500000	59	20368000	1	1	9	8	2	3	17	5	22
MFN2	O95140	MFN2_HUMAN	+	cellmembrane							+																	Mitofusin-2 OS=Homo sapiens OX=9606 GN=MFN2 PE=1 SV=3	sp|O95140|MFN2_HUMAN	0	28.183	sp|O95140|MFN2_HUMAN;sp|O95140-2|MFN2_HUMAN	2	10	23	86.401	757	1083400000	182	27779000	0	1	0	0	10	10	0	20	20
DUSP14	O95147	DUS14_HUMAN	+	cellpart																								Dual specificity protein phosphatase 14 OS=Homo sapiens OX=9606 GN=DUSP14 PE=1 SV=1	sp|O95147|DUS14_HUMAN	0	165.82	sp|O95147|DUS14_HUMAN	1	10	70.2	22.255	198	366230000	27	30519000	0	0	0	0	0	0	0	0	0
NDUFB4	O95168-2	NDUB4_HUMAN	+	cellmembrane							+																	Isoform 2 of NADH dehydrogenase [ubiquinone] 1 beta subcomplex subunit 4 OS=Homo sapiens OX=9606 GN=NDUFB4;NADH dehydrogenase [ubiquinone] 1 beta subcomplex subunit 4 OS=Homo sapiens OX=9606 GN=NDUFB4 PE=1 SV=3	sp|O95168-2|NDUB4_HUMAN;sp|O95168|NDUB4_HUMAN	0.0015682	4.193	sp|O95168-2|NDUB4_HUMAN;sp|O95168|NDUB4_HUMAN	2	4	35	14.026	120	751350000	84	125220000	0	1	0	0	9	11	0	20	20
NDUFB8	O95169-3	NDUB8_HUMAN	+	cellmembrane							+																	Isoform 3 of NADH dehydrogenase [ubiquinone] 1 beta subcomplex subunit 8, mitochondrial OS=Homo sapiens OX=9606 GN=NDUFB8;NADH dehydrogenase [ubiquinone] 1 beta subcomplex subunit 8, mitochondrial OS=Homo sapiens OX=9606 GN=NDUFB8 PE=1 SV=1;Isoform 2 of NA	sp|O95169-3|NDUB8_HUMAN;sp|O95169|NDUB8_HUMAN;sp|O95169-2|NDUB8_HUMAN	0.00066979	12.224	sp|O95169-3|NDUB8_HUMAN;sp|O95169|NDUB8_HUMAN;sp|O95169-2|NDUB8_HUMAN	3	7	51	18.479	155	888990000	111	177800000	0	1	0	0	9	9	0	18	18
NDUFA7	O95182	NDUA7_HUMAN	+	cellmembrane							+																	NADH dehydrogenase [ubiquinone] 1 alpha subcomplex subunit 7 OS=Homo sapiens OX=9606 GN=NDUFA7 PE=1 SV=3	sp|O95182|NDUA7_HUMAN	0	28.122	sp|O95182|NDUA7_HUMAN	1	6	57.5	12.551	113	2102800000	262	300400000	1	1	3	4	11	11	7	22	29
VAMP5	O95183	VAMP5_HUMAN	+	cellmembrane			+		+		+																	Vesicle-associated membrane protein 5 OS=Homo sapiens OX=9606 GN=VAMP5 PE=1 SV=1	sp|O95183|VAMP5_HUMAN	0	12.91	sp|O95183|VAMP5_HUMAN	1	2	22.4	12.805	116	534170000	48	89029000	1	1	1	1	4	3	2	7	9
RTN3	O95197-3	RTN3_HUMAN	+	cellmembrane							+																	Isoform 3 of Reticulon-3 OS=Homo sapiens OX=9606 GN=RTN3;Isoform 6 of Reticulon-3 OS=Homo sapiens OX=9606 GN=RTN3;Isoform 5 of Reticulon-3 OS=Homo sapiens OX=9606 GN=RTN3	sp|O95197-3|RTN3_HUMAN;sp|O95197-6|RTN3_HUMAN;sp|O95197-5|RTN3_HUMAN	0	122.13	sp|O95197-3|RTN3_HUMAN;sp|O95197-6|RTN3_HUMAN;sp|O95197-5|RTN3_HUMAN	3	4	28.4	25.609	236	10188000000	366	1698000000	1	1	7	7	11	11	14	22	36
LETM1	O95202	LETM1_HUMAN	+	cellmembrane							+																	Mitochondrial proton/calcium exchanger protein OS=Homo sapiens OX=9606 GN=LETM1 PE=1 SV=1	sp|O95202|LETM1_HUMAN	0	22.578	sp|O95202|LETM1_HUMAN;sp|O95202-2|LETM1_HUMAN;sp|O95202-3|LETM1_HUMAN	3	10	19.5	83.353	739	343610000	61	9042400	1	1	1	1	8	8	2	16	18
ATE1	O95260-2	ATE1_HUMAN	+	cellpart							+																	Isoform ATE1-2 of Arginyl-tRNA--protein transferase 1 OS=Homo sapiens OX=9606 GN=ATE1;Arginyl-tRNA--protein transferase 1 OS=Homo sapiens OX=9606 GN=ATE1 PE=1 SV=2	sp|O95260-2|ATE1_HUMAN;sp|O95260|ATE1_HUMAN	0.0016788	5.7051	sp|O95260-2|ATE1_HUMAN;sp|O95260|ATE1_HUMAN	2	4	15.3	59.031	518	151930000	16	6905700	0	1	0	0	2	2	0	4	4
VAPB	O95292	VAPB_HUMAN	+	cellmembrane							+																	Vesicle-associated membrane protein-associated protein B/C OS=Homo sapiens OX=9606 GN=VAPB PE=1 SV=3	sp|O95292|VAPB_HUMAN	0.00064935	10.611	sp|O95292|VAPB_HUMAN;sp|O95292-2|VAPB_HUMAN	2	7	45.7	27.228	243	4311600000	315	331660000	1	1	5	5	12	12	10	24	34
SNAPIN	O95295	SNAPN_HUMAN	+	cellmembrane		Endosome					+																	SNARE-associated protein Snapin OS=Homo sapiens OX=9606 GN=SNAPIN PE=1 SV=1	sp|O95295|SNAPN_HUMAN	0.00063012	9.5187	sp|O95295|SNAPN_HUMAN	1	2	25.7	14.874	136	8306800	8	1038400	0	0	0	0	0	0	0	0	0
NDUFC2	O95298	NDUC2_HUMAN	+	cellmembrane							+																	NADH dehydrogenase [ubiquinone] 1 subunit C2 OS=Homo sapiens OX=9606 GN=NDUFC2 PE=1 SV=1;Isoform 4 of NADH dehydrogenase [ubiquinone] 1 subunit C2 OS=Homo sapiens OX=9606 GN=NDUFC2;Isoform 5 of NADH dehydrogenase [ubiquinone] 1 subunit C2 OS=Homo sapiens O	sp|O95298|NDUC2_HUMAN;sp|O95298-2|NDUC2_HUMAN;sp|O95298-3|NDUC2_HUMAN;sp|E9PQ53|NDUCR_HUMAN	0.0016639	5.5225	sp|O95298|NDUC2_HUMAN;sp|O95298-2|NDUC2_HUMAN;sp|O95298-3|NDUC2_HUMAN;sp|E9PQ53|NDUCR_HUMAN	4	4	42	14.187	119	369560000	51	46194000	0	1	0	0	6	5	0	11	11
NDUFA10	O95299	NDUAA_HUMAN	+	cellpart							+																	NADH dehydrogenase [ubiquinone] 1 alpha subcomplex subunit 10, mitochondrial OS=Homo sapiens OX=9606 GN=NDUFA10 PE=1 SV=1;Isoform 2 of NADH dehydrogenase [ubiquinone] 1 alpha subcomplex subunit 10, mitochondrial OS=Homo sapiens OX=9606 GN=NDUFA10	sp|O95299|NDUAA_HUMAN;sp|O95299-2|NDUAA_HUMAN	0	28.884	sp|O95299|NDUAA_HUMAN;sp|O95299-2|NDUAA_HUMAN	2	9	48.5	40.75	355	1436900000	166	79828000	0	1	0	0	9	10	0	19	19
PGLS	O95336	6PGL_HUMAN	+	cellpart			+		+		+																	6-phosphogluconolactonase OS=Homo sapiens OX=9606 GN=PGLS PE=1 SV=2	sp|O95336|6PGL_HUMAN	0	47.229	sp|O95336|6PGL_HUMAN	1	12	81.4	27.547	258	5005100000	376	385010000	1	1	4	3	12	12	7	24	31
ATG7	O95352-3	ATG7_HUMAN	+	cellpart							+																	Isoform 3 of Ubiquitin-like modifier-activating enzyme ATG7 OS=Homo sapiens OX=9606 GN=ATG7;Isoform 2 of Ubiquitin-like modifier-activating enzyme ATG7 OS=Homo sapiens OX=9606 GN=ATG7;Ubiquitin-like modifier-activating enzyme ATG7 OS=Homo sapiens OX=9606 G	sp|O95352-3|ATG7_HUMAN;sp|O95352-2|ATG7_HUMAN;sp|O95352|ATG7_HUMAN	0.0077626	1.929	sp|O95352-3|ATG7_HUMAN;sp|O95352-2|ATG7_HUMAN;sp|O95352|ATG7_HUMAN	3	2	6.9	68.617	623	21463000	7	650410	0	1	0	0	1	1	0	2	2
LYPLA2	O95372	LYPA2_HUMAN	+	cellpart			+		+		+																	Acyl-protein thioesterase 2 OS=Homo sapiens OX=9606 GN=LYPLA2 PE=1 SV=1	sp|O95372|LYPA2_HUMAN	0	15.607	sp|O95372|LYPA2_HUMAN	1	4	47.6	24.737	231	377730000	36	31478000	0	1	0	0	6	5	0	11	11
IPO7	O95373	IPO7_HUMAN	+	cellpart							+																	Importin-7 OS=Homo sapiens OX=9606 GN=IPO7 PE=1 SV=1	sp|O95373|IPO7_HUMAN	0.0011998	7.7044	sp|O95373|IPO7_HUMAN;sp|O15397-2|IPO8_HUMAN	2	11	16.4	119.52	1038	260450000	65	6511300	1	1	3	2	5	7	5	12	17
TNFAIP8	O95379-3	TFIP8_HUMAN	+	cellpart							+																	Isoform 3 of Tumor necrosis factor alpha-induced protein 8 OS=Homo sapiens OX=9606 GN=TNFAIP8;Isoform 2 of Tumor necrosis factor alpha-induced protein 8 OS=Homo sapiens OX=9606 GN=TNFAIP8;Tumor necrosis factor alpha-induced protein 8 OS=Homo sapiens OX=960	sp|O95379-3|TFIP8_HUMAN;sp|O95379-2|TFIP8_HUMAN;sp|O95379|TFIP8_HUMAN;sp|O95379-4|TFIP8_HUMAN	0.0015488	3.9323	sp|O95379-3|TFIP8_HUMAN;sp|O95379-2|TFIP8_HUMAN;sp|O95379|TFIP8_HUMAN;sp|O95379-4|TFIP8_HUMAN	4	2	26.6	21.877	188	137290000	44	15254000	1	1	2	3	2	3	5	5	10
PIGN	O95427	PIGN_HUMAN	+	cellmembrane							+																	GPI ethanolamine phosphate transferase 1 OS=Homo sapiens OX=9606 GN=PIGN PE=1 SV=1	sp|O95427|PIGN_HUMAN	0.0019296	2.6498	sp|O95427|PIGN_HUMAN	1	4	6.2	105.81	931	45932000	5	1583900	1	1	0	1	1	1	1	2	3
PAPLN	O95428-4	PPN_HUMAN	+	cellsurface																								Isoform 4 of Papilin OS=Homo sapiens OX=9606 GN=PAPLN;Isoform 6 of Papilin OS=Homo sapiens OX=9606 GN=PAPLN;Isoform 5 of Papilin OS=Homo sapiens OX=9606 GN=PAPLN;Papilin OS=Homo sapiens OX=9606 GN=PAPLN PE=2 SV=4	sp|O95428-4|PPN_HUMAN;sp|O95428-6|PPN_HUMAN;sp|O95428-5|PPN_HUMAN;sp|O95428|PPN_HUMAN	0.0090498	1.8131	sp|O95428-4|PPN_HUMAN;sp|O95428-6|PPN_HUMAN;sp|O95428-5|PPN_HUMAN;sp|O95428|PPN_HUMAN	4	2	3.5	119.21	1109	4275700	3	83838	0	0	0	0	0	0	0	0	0
APOM	O95445	APOM_HUMAN	+	serum/plasma	apolipo																							Apolipoprotein M OS=Homo sapiens OX=9606 GN=APOM PE=1 SV=2	sp|O95445|APOM_HUMAN	0	229.81	sp|O95445|APOM_HUMAN	1	16	89.4	21.253	188	29211000000	1011	2921100000	1	1	12	12	12	12	24	24	48
VNN1	O95497	VNN1_HUMAN	+	cellmembrane							+																	Pantetheinase OS=Homo sapiens OX=9606 GN=VNN1 PE=1 SV=2	sp|O95497|VNN1_HUMAN	0.0019617	2.8941	sp|O95497|VNN1_HUMAN	1	2	8.4	57.011	513	15145000	3	721170	0	0	0	0	0	0	0	0	0
VNN2	O95498-6	VNN2_HUMAN	+	cellmembrane																								Isoform 6 of Vascular non-inflammatory molecule 2 OS=Homo sapiens OX=9606 GN=VNN2;Vascular non-inflammatory molecule 2 OS=Homo sapiens OX=9606 GN=VNN2 PE=1 SV=3;Isoform 3 of Vascular non-inflammatory molecule 2 OS=Homo sapiens OX=9606 GN=VNN2;Isoform 4 of	sp|O95498-6|VNN2_HUMAN;sp|O95498|VNN2_HUMAN;sp|O95498-3|VNN2_HUMAN;sp|O95498-4|VNN2_HUMAN;sp|O95498-2|VNN2_HUMAN	0.001218	8.235	sp|O95498-6|VNN2_HUMAN;sp|O95498|VNN2_HUMAN;sp|O95498-3|VNN2_HUMAN;sp|O95498-4|VNN2_HUMAN;sp|O95498-2|VNN2_HUMAN;sp|O95498-5|VNN2_HUMAN	6	5	16.7	52.843	467	358520000	108	21090000	1	1	3	3	3	4	6	7	13
MPC2	O95563	MPC2_HUMAN	+	cellmembrane																								Mitochondrial pyruvate carrier 2 OS=Homo sapiens OX=9606 GN=MPC2 PE=1 SV=1	sp|O95563|MPC2_HUMAN	0.00148	3.0022	sp|O95563|MPC2_HUMAN	1	4	40.2	14.279	127	346430000	53	43303000	0	1	0	0	4	4	0	8	8
ETHE1	O95571	ETHE1_HUMAN	+	cellpart							+																	Persulfide dioxygenase ETHE1, mitochondrial OS=Homo sapiens OX=9606 GN=ETHE1 PE=1 SV=2	sp|O95571|ETHE1_HUMAN	0	47.646	sp|O95571|ETHE1_HUMAN	1	11	65	27.873	254	6439400000	509	459960000	1	1	4	2	12	12	6	24	30
ACSL3	O95573	ACSL3_HUMAN	+	cellmembrane							+																	Long-chain-fatty-acid--CoA ligase 3 OS=Homo sapiens OX=9606 GN=ACSL3 PE=1 SV=3	sp|O95573|ACSL3_HUMAN	0	42.794	sp|O95573|ACSL3_HUMAN	1	18	42.2	80.419	720	1896300000	267	61170000	1	1	2	3	11	11	5	22	27
ASMTL	O95671	ASML_HUMAN	+	cellpart							+																	Probable bifunctional dTTP/UTP pyrophosphatase/methyltransferase protein OS=Homo sapiens OX=9606 GN=ASMTL PE=1 SV=3;Isoform 2 of Probable bifunctional dTTP/UTP pyrophosphatase/methyltransferase protein OS=Homo sapiens OX=9606 GN=ASMTL;Isoform 3 of Probable	sp|O95671|ASML_HUMAN;sp|O95671-2|ASML_HUMAN;sp|O95671-3|ASML_HUMAN	0.0014793	2.9825	sp|O95671|ASML_HUMAN;sp|O95671-2|ASML_HUMAN;sp|O95671-3|ASML_HUMAN	3	5	19	68.856	621	837650000	8	28884000	0	1	0	0	3	3	0	6	6
CDS2	O95674	CDS2_HUMAN	+	cellmembrane							+																	Phosphatidate cytidylyltransferase 2 OS=Homo sapiens OX=9606 GN=CDS2 PE=1 SV=1	sp|O95674|CDS2_HUMAN	0	215.35	sp|O95674|CDS2_HUMAN;sp|Q92903|CDS1_HUMAN	2	14	34.6	51.417	445	7259800000	638	453740000	1	1	9	8	11	11	17	22	39
SNAP29	O95721	SNP29_HUMAN	+	cellpart							+																	Synaptosomal-associated protein 29 OS=Homo sapiens OX=9606 GN=SNAP29 PE=1 SV=1	sp|O95721|SNP29_HUMAN	0	14.572	sp|O95721|SNP29_HUMAN	1	12	62.4	28.97	258	2575300000	329	198100000	1	1	5	6	11	11	11	22	33
AP2A1	O95782-2	AP2A1_HUMAN	+	cellmembrane		Endosome					+																	Isoform B of AP-2 complex subunit alpha-1 OS=Homo sapiens OX=9606 GN=AP2A1;AP-2 complex subunit alpha-1 OS=Homo sapiens OX=9606 GN=AP2A1 PE=1 SV=3	sp|O95782-2|AP2A1_HUMAN;sp|O95782|AP2A1_HUMAN	0	60.782	sp|O95782-2|AP2A1_HUMAN;sp|O95782|AP2A1_HUMAN	2	26	43.8	105.36	955	6083400000	770	114780000	1	1	9	8	12	12	17	24	41
CAVIN2	O95810	CAVN2_HUMAN	+	cellpart																								Caveolae-associated protein 2 OS=Homo sapiens OX=9606 GN=CAVIN2 PE=1 SV=3	sp|O95810|CAVN2_HUMAN	0	323.31	sp|O95810|CAVN2_HUMAN	1	32	69.2	47.173	425	245880000000	3453	13660000000	1	1	12	12	12	12	24	24	48
AIFM1	O95831	AIFM1_HUMAN	+	cellpart							+																	Apoptosis-inducing factor 1, mitochondrial OS=Homo sapiens OX=9606 GN=AIFM1 PE=1 SV=1;Isoform 3 of Apoptosis-inducing factor 1, mitochondrial OS=Homo sapiens OX=9606 GN=AIFM1;Isoform 2 of Apoptosis-inducing factor 1, mitochondrial OS=Homo sapiens OX=9606 G	sp|O95831|AIFM1_HUMAN;sp|O95831-3|AIFM1_HUMAN;sp|O95831-2|AIFM1_HUMAN;sp|O95831-5|AIFM1_HUMAN	0	124.43	sp|O95831|AIFM1_HUMAN;sp|O95831-3|AIFM1_HUMAN;sp|O95831-2|AIFM1_HUMAN;sp|O95831-5|AIFM1_HUMAN;sp|O95831-4|AIFM1_HUMAN;sp|O95831-6|AIFM1_HUMAN	6	28	58.9	66.9	613	12717000000	1374	423910000	1	1	9	11	12	12	20	24	44
EML2	O95834	EMAL2_HUMAN	+	cellpart							+																	Echinoderm microtubule-associated protein-like 2 OS=Homo sapiens OX=9606 GN=EML2 PE=1 SV=1;Isoform 2 of Echinoderm microtubule-associated protein-like 2 OS=Homo sapiens OX=9606 GN=EML2;Isoform 3 of Echinoderm microtubule-associated protein-like 2 OS=Homo s	sp|O95834|EMAL2_HUMAN;sp|O95834-2|EMAL2_HUMAN;sp|O95834-3|EMAL2_HUMAN	0	17.02	sp|O95834|EMAL2_HUMAN;sp|O95834-2|EMAL2_HUMAN;sp|O95834-3|EMAL2_HUMAN	3	8	20.6	70.678	649	758140000	100	26143000	1	1	2	2	8	10	4	18	22
GNA14	O95837	GNA14_HUMAN	+	cellmembrane			+		+		+																	Guanine nucleotide-binding protein subunit alpha-14 OS=Homo sapiens OX=9606 GN=GNA14 PE=1 SV=1	sp|O95837|GNA14_HUMAN	0.00065445	10.999	sp|O95837|GNA14_HUMAN	1	2	13.5	41.57	355	1639900000	167	81994000	1	1	6	8	11	11	14	22	36
MPIG6B	O95866-2	G6B_HUMAN	+	cellmembrane							+																	Isoform A of Megakaryocyte and platelet inhibitory receptor G6b OS=Homo sapiens OX=9606 GN=MPIG6B;Isoform G of Megakaryocyte and platelet inhibitory receptor G6b OS=Homo sapiens OX=9606 GN=MPIG6B;Isoform D of Megakaryocyte and platelet inhibitory receptor	sp|O95866-2|G6B_HUMAN;sp|O95866-7|G6B_HUMAN;sp|O95866-4|G6B_HUMAN	0	174.3	sp|O95866-2|G6B_HUMAN;sp|O95866-7|G6B_HUMAN;sp|O95866-4|G6B_HUMAN	3	16	78.1	25.003	237	119800000000	2834	10891000000	1	1	12	12	12	12	24	24	48
ABHD16A	O95870	ABHGA_HUMAN	+	cellmembrane																								Phosphatidylserine lipase ABHD16A OS=Homo sapiens OX=9606 GN=ABHD16A PE=1 SV=3;Isoform 2 of Phosphatidylserine lipase ABHD16A OS=Homo sapiens OX=9606 GN=ABHD16A	sp|O95870|ABHGA_HUMAN;sp|O95870-2|ABHGA_HUMAN	0	213.36	sp|O95870|ABHGA_HUMAN;sp|O95870-2|ABHGA_HUMAN	2	34	56.3	63.243	558	32694000000	1851	1127400000	1	1	10	9	12	12	19	24	43
TXNDC12	O95881	TXD12_HUMAN	+	cellpart							+																	Thioredoxin domain-containing protein 12 OS=Homo sapiens OX=9606 GN=TXNDC12 PE=1 SV=1	sp|O95881|TXD12_HUMAN	0	15.788	sp|O95881|TXD12_HUMAN	1	3	36	19.206	172	503890000	58	50389000	0	1	0	0	7	7	0	14	14
EFEMP2	O95967	FBLN4_HUMAN	+	cellsurface			+		+																			EGF-containing fibulin-like extracellular matrix protein 2 OS=Homo sapiens OX=9606 GN=EFEMP2 PE=1 SV=3	sp|O95967|FBLN4_HUMAN	0	17.504	sp|O95967|FBLN4_HUMAN	1	7	23.7	49.405	443	239560000	14	11408000	0	1	0	0	2	1	0	3	3
RECK	O95980	RECK_HUMAN	+	cellmembrane							+																	Reversion-inducing cysteine-rich protein with Kazal motifs OS=Homo sapiens OX=9606 GN=RECK PE=1 SV=1	sp|O95980|RECK_HUMAN	0	14.086	sp|O95980|RECK_HUMAN	1	10	18	106.46	971	223310000	27	5193300	1	1	0	1	3	3	1	6	7
NDUFB10	O96000	NDUBA_HUMAN	+	cellmembrane							+																	NADH dehydrogenase [ubiquinone] 1 beta subcomplex subunit 10 OS=Homo sapiens OX=9606 GN=NDUFB10 PE=1 SV=3;Isoform 2 of NADH dehydrogenase [ubiquinone] 1 beta subcomplex subunit 10 OS=Homo sapiens OX=9606 GN=NDUFB10	sp|O96000|NDUBA_HUMAN;sp|O96000-2|NDUBA_HUMAN	0	29.172	sp|O96000|NDUBA_HUMAN;sp|O96000-2|NDUBA_HUMAN	2	9	61	20.776	172	2127400000	211	193400000	1	1	1	0	11	11	1	22	23
TOMM40	O96008-2	TOM40_HUMAN	+	cellpart							+																	Isoform 2 of Mitochondrial import receptor subunit TOM40 homolog OS=Homo sapiens OX=9606 GN=TOMM40;Mitochondrial import receptor subunit TOM40 homolog OS=Homo sapiens OX=9606 GN=TOMM40 PE=1 SV=1	sp|O96008-2|TOM40_HUMAN;sp|O96008|TOM40_HUMAN	0	40.061	sp|O96008-2|TOM40_HUMAN;sp|O96008|TOM40_HUMAN	2	3	24	34.441	329	340400000	55	42550000	0	1	0	0	7	8	0	15	15
CYB5A	P00167-2	CYB5_HUMAN	+	cellmembrane							+																	Isoform 2 of Cytochrome b5 OS=Homo sapiens OX=9606 GN=CYB5A;Cytochrome b5 OS=Homo sapiens OX=9606 GN=CYB5A PE=1 SV=2;Isoform 3 of Cytochrome b5 OS=Homo sapiens OX=9606 GN=CYB5A	sp|P00167-2|CYB5_HUMAN;sp|P00167|CYB5_HUMAN;sp|P00167-3|CYB5_HUMAN	0.00063816	9.9117	sp|P00167-2|CYB5_HUMAN;sp|P00167|CYB5_HUMAN;sp|P00167-3|CYB5_HUMAN	3	5	67.3	11.268	98	563320000	72	80474000	1	1	1	1	7	9	2	16	18
LDHA	P00338	LDHA_HUMAN	+	cellpart			+		+		+																	L-lactate dehydrogenase A chain OS=Homo sapiens OX=9606 GN=LDHA PE=1 SV=2;Isoform 3 of L-lactate dehydrogenase A chain OS=Homo sapiens OX=9606 GN=LDHA;Isoform 4 of L-lactate dehydrogenase A chain OS=Homo sapiens OX=9606 GN=LDHA;Isoform 5 of L-lactate dehyd	sp|P00338|LDHA_HUMAN;sp|P00338-3|LDHA_HUMAN;sp|P00338-4|LDHA_HUMAN;sp|P00338-5|LDHA_HUMAN;sp|P00338-2|LDHA_HUMAN	0	323.31	sp|P00338|LDHA_HUMAN;sp|P00338-3|LDHA_HUMAN;sp|P00338-4|LDHA_HUMAN;sp|P00338-5|LDHA_HUMAN;sp|P00338-2|LDHA_HUMAN;sp|Q6ZMR3|LDH6A_HUMAN	6	33	91.3	36.688	332	79237000000	3438	4402000000	1	1	11	12	12	12	23	24	47
ALDH1A1	P00352	AL1A1_HUMAN	+	cellpart			+		+		+																	Retinal dehydrogenase 1 OS=Homo sapiens OX=9606 GN=ALDH1A1 PE=1 SV=2	sp|P00352|AL1A1_HUMAN	0.0014903	3.1604	sp|P00352|AL1A1_HUMAN	1	9	29.9	54.861	501	353900000	23	16087000	1	1	1	1	2	3	2	5	7
GLUD1	P00367	DHE3_HUMAN	+	cellpart							+																	Glutamate dehydrogenase 1, mitochondrial OS=Homo sapiens OX=9606 GN=GLUD1 PE=1 SV=2;Isoform 3 of Glutamate dehydrogenase 1, mitochondrial OS=Homo sapiens OX=9606 GN=GLUD1;Isoform 2 of Glutamate dehydrogenase 1, mitochondrial OS=Homo sapiens OX=9606 GN=GLUD	sp|P00367|DHE3_HUMAN;sp|P00367-3|DHE3_HUMAN;sp|P00367-2|DHE3_HUMAN	0	118.1	sp|P00367|DHE3_HUMAN;sp|P00367-3|DHE3_HUMAN;sp|P00367-2|DHE3_HUMAN;sp|P49448|DHE4_HUMAN	4	27	62.7	61.397	558	19352000000	1300	624250000	1	1	10	12	12	12	22	24	46
CYB5R3	P00387-2	NB5R3_HUMAN	+	cellpart							+																	Isoform 2 of NADH-cytochrome b5 reductase 3 OS=Homo sapiens OX=9606 GN=CYB5R3;NADH-cytochrome b5 reductase 3 OS=Homo sapiens OX=9606 GN=CYB5R3 PE=1 SV=3;Isoform 3 of NADH-cytochrome b5 reductase 3 OS=Homo sapiens OX=9606 GN=CYB5R3	sp|P00387-2|NB5R3_HUMAN;sp|P00387|NB5R3_HUMAN;sp|P00387-3|NB5R3_HUMAN	0	323.31	sp|P00387-2|NB5R3_HUMAN;sp|P00387|NB5R3_HUMAN;sp|P00387-3|NB5R3_HUMAN	3	29	91.7	31.628	278	194650000000	4977	14973000000	1	1	12	12	12	12	24	24	48
GSR	P00390-2	GSHR_HUMAN	+	cellmembrane			+		+		+																	Isoform Cytoplasmic of Glutathione reductase, mitochondrial OS=Homo sapiens OX=9606 GN=GSR;Glutathione reductase, mitochondrial OS=Homo sapiens OX=9606 GN=GSR PE=1 SV=2;Isoform 2 of Glutathione reductase, mitochondrial OS=Homo sapiens OX=9606 GN=GSR;Isofor	sp|P00390-2|GSHR_HUMAN;sp|P00390|GSHR_HUMAN;sp|P00390-3|GSHR_HUMAN;sp|P00390-4|GSHR_HUMAN;sp|P00390-5|GSHR_HUMAN	0	210.43	sp|P00390-2|GSHR_HUMAN;sp|P00390|GSHR_HUMAN;sp|P00390-3|GSHR_HUMAN;sp|P00390-4|GSHR_HUMAN;sp|P00390-5|GSHR_HUMAN	5	29	85.4	51.7	479	14875000000	1036	743750000	1	1	8	9	12	12	17	24	41
MT-CO1	P00395	COX1_HUMAN	+	cellmembrane																								Cytochrome c oxidase subunit 1 OS=Homo sapiens OX=9606 GN=MT-CO1 PE=1 SV=1	sp|P00395|COX1_HUMAN	0.0016181	4.7598	sp|P00395|COX1_HUMAN	1	2	6.2	57.041	513	81581000	14	16316000	0	1	0	0	2	2	0	4	4
MT-CO2	P00403	COX2_HUMAN	+	cellmembrane							+																	Cytochrome c oxidase subunit 2 OS=Homo sapiens OX=9606 GN=MT-CO2 PE=1 SV=1	sp|P00403|COX2_HUMAN	0	79.893	sp|P00403|COX2_HUMAN	1	7	41	25.565	227	10087000000	536	1681200000	1	1	9	9	12	12	18	24	42
SOD1	P00441	SODC_HUMAN	+	cellpart			+		+		+																	Superoxide dismutase [Cu-Zn] OS=Homo sapiens OX=9606 GN=SOD1 PE=1 SV=2	sp|P00441|SODC_HUMAN	0	323.31	sp|P00441|SODC_HUMAN	1	16	96.8	15.936	154	54963000000	1372	6870400000	1	1	10	11	12	12	21	24	45
CP	P00450	CERU_HUMAN	+	cellsurface			+	+	+	+	+																	Ceruloplasmin OS=Homo sapiens OX=9606 GN=CP PE=1 SV=1	sp|P00450|CERU_HUMAN	0	323.31	sp|P00450|CERU_HUMAN	1	79	78.9	122.2	1065	273060000000	11309	5936100000	1	1	12	12	12	12	24	24	48
F8	P00451	FA8_HUMAN	+	serum/plasma	coag																							Coagulation factor VIII OS=Homo sapiens OX=9606 GN=F8 PE=1 SV=1	sp|P00451|FA8_HUMAN	0	16.891	sp|P00451|FA8_HUMAN;sp|P00451-2|FA8_HUMAN	2	17	14.1	267.01	2351	745370000	102	6263600	1	1	5	6	6	5	11	11	22
F13A1	P00488	F13A_HUMAN	+	serum/plasma	coag			+		+	+																	Coagulation factor XIII A chain OS=Homo sapiens OX=9606 GN=F13A1 PE=1 SV=4	sp|P00488|F13A_HUMAN	0	323.31	sp|P00488|F13A_HUMAN	1	105	94.7	83.266	732	1129500000000	19520	33222000000	1	1	12	12	12	12	24	24	48
PNP	P00491	PNPH_HUMAN	+	cellpart			+		+		+																	Purine nucleoside phosphorylase OS=Homo sapiens OX=9606 GN=PNP PE=1 SV=2	sp|P00491|PNPH_HUMAN	0	323.31	sp|P00491|PNPH_HUMAN	1	30	87.2	32.118	289	75037000000	3023	4168700000	1	1	12	12	12	12	24	24	48
HPRT1	P00492	HPRT_HUMAN	+	cellpart			+		+		+																	Hypoxanthine-guanine phosphoribosyltransferase OS=Homo sapiens OX=9606 GN=HPRT1 PE=1 SV=2	sp|P00492|HPRT_HUMAN	0	75.096	sp|P00492|HPRT_HUMAN	1	9	64.2	24.579	218	1905800000	269	146600000	1	1	1	1	10	11	2	21	23
GOT2	P00505	AATM_HUMAN	+	cellmembrane			+		+		+																	Aspartate aminotransferase, mitochondrial OS=Homo sapiens OX=9606 GN=GOT2 PE=1 SV=3;Isoform 2 of Aspartate aminotransferase, mitochondrial OS=Homo sapiens OX=9606 GN=GOT2	sp|P00505|AATM_HUMAN;sp|P00505-2|AATM_HUMAN	0	132.03	sp|P00505|AATM_HUMAN;sp|P00505-2|AATM_HUMAN	2	21	67.4	47.517	430	10596000000	933	407550000	1	1	8	9	12	12	17	24	41
PGK1	P00558	PGK1_HUMAN	+	cellpart			+		+		+																	Phosphoglycerate kinase 1 OS=Homo sapiens OX=9606 GN=PGK1 PE=1 SV=3;Isoform 2 of Phosphoglycerate kinase 1 OS=Homo sapiens OX=9606 GN=PGK1	sp|P00558|PGK1_HUMAN;sp|P00558-2|PGK1_HUMAN	0	323.31	sp|P00558|PGK1_HUMAN;sp|P00558-2|PGK1_HUMAN	2	48	94.5	44.614	417	149570000000	5509	5982800000	1	1	12	12	12	12	24	24	48
AK1	P00568	KAD1_HUMAN	+	cellpart			+		+		+																	Adenylate kinase isoenzyme 1 OS=Homo sapiens OX=9606 GN=AK1 PE=1 SV=3	sp|P00568|KAD1_HUMAN	0	35.103	sp|P00568|KAD1_HUMAN	1	10	62.9	21.635	194	1215100000	262	110460000	1	1	7	7	12	12	14	24	38
F2	P00734	THRB_HUMAN	+	serum/plasma	coag		+	+	+	+	+																	Prothrombin OS=Homo sapiens OX=9606 GN=F2 PE=1 SV=2	sp|P00734|THRB_HUMAN	0	323.31	sp|P00734|THRB_HUMAN	1	45	66.1	70.036	622	178500000000	7000	5757900000	1	1	12	12	12	12	24	24	48
C1R	P00736	C1R_HUMAN	+	serum/plasma	compl		+	+	+	+	+																	Complement C1r subcomponent OS=Homo sapiens OX=9606 GN=C1R PE=1 SV=2	sp|P00736|C1R_HUMAN	0	323.31	sp|P00736|C1R_HUMAN	1	48	62.1	80.118	705	207470000000	4457	6286900000	1	1	12	12	12	12	24	24	48
HP	P00738	HPT_HUMAN	+	serum/plasma	other		+	+	+	+	+																	Haptoglobin OS=Homo sapiens OX=9606 GN=HP PE=1 SV=1;Isoform 2 of Haptoglobin OS=Homo sapiens OX=9606 GN=HP	sp|P00738|HPT_HUMAN;sp|P00738-2|HPT_HUMAN	0	323.31	sp|P00738|HPT_HUMAN;sp|P00738-2|HPT_HUMAN	2	53	78.8	45.205	406	1611900000000	13058	80597000000	1	1	12	12	12	12	24	24	48
HPR	P00739	HPTR_HUMAN	+	serum/plasma	other		+	+	+	+																		Haptoglobin-related protein OS=Homo sapiens OX=9606 GN=HPR PE=2 SV=2;Isoform 2 of Haptoglobin-related protein OS=Homo sapiens OX=9606 GN=HPR	sp|P00739|HPTR_HUMAN;sp|P00739-2|HPTR_HUMAN	0	323.31	sp|P00739|HPTR_HUMAN;sp|P00739-2|HPTR_HUMAN	2	13	81.3	39.029	348	81246000000	3093	4062300000	1	1	12	12	12	12	24	24	48
F9	P00740	FA9_HUMAN	+	serum/plasma	coag		+		+																			Coagulation factor IX OS=Homo sapiens OX=9606 GN=F9 PE=1 SV=2;Isoform 2 of Coagulation factor IX OS=Homo sapiens OX=9606 GN=F9	sp|P00740|FA9_HUMAN;sp|P00740-2|FA9_HUMAN	0.0012129	7.9762	sp|P00740|FA9_HUMAN;sp|P00740-2|FA9_HUMAN	2	10	34.5	51.778	461	387650000	85	20403000	1	1	8	8	9	11	16	20	36
CFD	P00746	CFAD_HUMAN	+	serum/plasma	compl		+		+		+																	Complement factor D OS=Homo sapiens OX=9606 GN=CFD PE=1 SV=5	sp|P00746|CFAD_HUMAN	0.0016138	4.7028	sp|P00746|CFAD_HUMAN	1	4	35.2	27.033	253	301630000	64	27421000	1	1	9	9	2	3	18	5	23
PLG	P00747	PLMN_HUMAN	+	serum/plasma	coag		+	+	+	+	+																	Plasminogen OS=Homo sapiens OX=9606 GN=PLG PE=1 SV=2	sp|P00747|PLMN_HUMAN	0	323.31	sp|P00747|PLMN_HUMAN;sp|Q02325|PLGB_HUMAN	2	101	86.8	90.568	810	574540000000	13796	13361000000	1	1	12	12	12	12	24	24	48
F12	P00748	FA12_HUMAN	+	serum/plasma	coag		+		+																			Coagulation factor XII OS=Homo sapiens OX=9606 GN=F12 PE=1 SV=3	sp|P00748|FA12_HUMAN	0	79.434	sp|P00748|FA12_HUMAN	1	15	37.2	67.791	615	11391000000	971	406820000	1	1	12	12	12	12	24	24	48
CFB	P00751	CFAB_HUMAN	+	serum/plasma	compl		+	+	+	+	+																	Complement factor B OS=Homo sapiens OX=9606 GN=CFB PE=1 SV=2;Isoform 2 of Complement factor B OS=Homo sapiens OX=9606 GN=CFB	sp|P00751|CFAB_HUMAN;sp|P00751-2|CFAB_HUMAN	0	323.31	sp|P00751|CFAB_HUMAN;sp|P00751-2|CFAB_HUMAN	2	67	68.3	85.532	764	148130000000	6936	4114800000	1	1	12	12	12	12	24	24	48
CA1	P00915	CAH1_HUMAN	+	cellpart			+		+		+																	Carbonic anhydrase 1 OS=Homo sapiens OX=9606 GN=CA1 PE=1 SV=2	sp|P00915|CAH1_HUMAN	0	75.359	sp|P00915|CAH1_HUMAN	1	13	62.1	28.87	261	6769300000	748	483520000	1	1	12	12	10	11	24	21	45
CA2	P00918	CAH2_HUMAN	+	cellpart			+		+		+																	Carbonic anhydrase 2 OS=Homo sapiens OX=9606 GN=CA2 PE=1 SV=2	sp|P00918|CAH2_HUMAN	0	323.31	sp|P00918|CAH2_HUMAN;CON__sp|P00921|CAH2_BOVIN	2	34	96.2	29.246	260	84243000000	2718	6017300000	1	1	11	12	12	12	23	24	47
SERPINC1	P01008	ANT3_HUMAN	+	serum/plasma	coag		+	+	+	+	+																	Antithrombin-III OS=Homo sapiens OX=9606 GN=SERPINC1 PE=1 SV=1	sp|P01008|ANT3_HUMAN	0	323.31	sp|P01008|ANT3_HUMAN	1	37	67	52.602	464	74482000000	4215	2758600000	1	1	12	12	12	12	24	24	48
SERPINA1	P01009	A1AT_HUMAN	+	serum/plasma	other		+		+		+																	Alpha-1-antitrypsin OS=Homo sapiens OX=9606 GN=SERPINA1 PE=1 SV=3;Isoform 2 of Alpha-1-antitrypsin OS=Homo sapiens OX=9606 GN=SERPINA1;Isoform 3 of Alpha-1-antitrypsin OS=Homo sapiens OX=9606 GN=SERPINA1	sp|P01009|A1AT_HUMAN;sp|P01009-2|A1AT_HUMAN;sp|P01009-3|A1AT_HUMAN	0	323.31	sp|P01009|A1AT_HUMAN;sp|P01009-2|A1AT_HUMAN;sp|P01009-3|A1AT_HUMAN	3	66	73.2	46.736	418	1364600000000	15977	59329000000	1	1	12	12	12	12	24	24	48
SERPINA3	P01011	AACT_HUMAN	+	serum/plasma	other		+	+	+	+	+																	Alpha-1-antichymotrypsin OS=Homo sapiens OX=9606 GN=SERPINA3 PE=1 SV=2	sp|P01011|AACT_HUMAN	0	323.31	sp|P01011|AACT_HUMAN;sp|P01011-2|AACT_HUMAN;sp|P01011-3|AACT_HUMAN	3	38	65	47.65	423	109090000000	4529	5454600000	1	1	12	12	12	12	24	24	48
AGT	P01019	ANGT_HUMAN	+	cellsurface			+	+	+	+	+																	Angiotensinogen OS=Homo sapiens OX=9606 GN=AGT PE=1 SV=1	sp|P01019|ANGT_HUMAN	0	274.48	sp|P01019|ANGT_HUMAN	1	16	40	53.154	485	22327000000	1938	1240400000	1	1	12	12	12	12	24	24	48
A2M	P01023	A2MG_HUMAN	+	serum/plasma	other		+	+	+	+	+																	Alpha-2-macroglobulin OS=Homo sapiens OX=9606 GN=A2M PE=1 SV=3	sp|P01023|A2MG_HUMAN	0	323.31	sp|P01023|A2MG_HUMAN	1	132	78.8	163.29	1474	1075400000000	22607	15585000000	1	1	12	12	12	12	24	24	48
C3	P01024	CO3_HUMAN	+	serum/plasma	compl		+	+	+	+	+																	Complement C3 OS=Homo sapiens OX=9606 GN=C3 PE=1 SV=2	sp|P01024|CO3_HUMAN	0	323.31	sp|P01024|CO3_HUMAN	1	230	90.4	187.15	1663	2373900000000	52950	24989000000	1	1	12	12	12	12	24	24	48
C5	P01031	CO5_HUMAN	+	serum/plasma	compl		+		+		+																	Complement C5 OS=Homo sapiens OX=9606 GN=C5 PE=1 SV=4	sp|P01031|CO5_HUMAN	0	323.31	sp|P01031|CO5_HUMAN	1	87	69.4	188.3	1676	47540000000	5050	579750000	1	1	12	12	12	12	24	24	48
TIMP1	P01033	TIMP1_HUMAN	+	cellsurface			+		+		+																	Metalloproteinase inhibitor 1 OS=Homo sapiens OX=9606 GN=TIMP1 PE=1 SV=1	sp|P01033|TIMP1_HUMAN	0	100.11	sp|P01033|TIMP1_HUMAN	1	14	61.4	23.171	207	22885000000	945	2080400000	1	1	9	9	12	12	18	24	42
CST3	P01034	CYTC_HUMAN	+	cellsurface			+		+		+																	Cystatin-C OS=Homo sapiens OX=9606 GN=CST3 PE=1 SV=1	sp|P01034|CYTC_HUMAN	0.00063251	9.6475	sp|P01034|CYTC_HUMAN	1	3	32.9	15.799	146	1893700000	110	270540000	1	1	6	5	10	10	11	20	31
KNG1	P01042	KNG1_HUMAN	+	serum/plasma	coag		+	+	+	+	+																	Kininogen-1 OS=Homo sapiens OX=9606 GN=KNG1 PE=1 SV=2	sp|P01042|KNG1_HUMAN	0	323.31	sp|P01042|KNG1_HUMAN	1	45	52.3	71.957	644	251820000000	7332	7194700000	1	1	12	12	12	12	24	24	48
NRAS	P01111	RASN_HUMAN	+	cellmembrane			+		+		+																	GTPase NRas OS=Homo sapiens OX=9606 GN=NRAS PE=1 SV=1	sp|P01111|RASN_HUMAN	0.0016882	5.8727	sp|P01111|RASN_HUMAN	1	3	63.5	21.229	189	275490000	41	27549000	1	1	1	1	4	6	2	10	12
KRAS	P01116-2	RASK_HUMAN	+	cellmembrane		focal adhesion					+																	Isoform 2B of GTPase KRas OS=Homo sapiens OX=9606 GN=KRAS;GTPase KRas OS=Homo sapiens OX=9606 GN=KRAS PE=1 SV=1	sp|P01116-2|RASK_HUMAN;sp|P01116|RASK_HUMAN	0	39.653	sp|P01116-2|RASK_HUMAN;sp|P01116|RASK_HUMAN	2	11	68.6	21.424	188	1998400000	189	222040000	1	1	4	3	11	11	7	22	29
PDGFB	P01127-2	PDGFB_HUMAN	+	cellsurface							+																	Isoform 2 of Platelet-derived growth factor subunit B OS=Homo sapiens OX=9606 GN=PDGFB;Platelet-derived growth factor subunit B OS=Homo sapiens OX=9606 GN=PDGFB PE=1 SV=1	sp|P01127-2|PDGFB_HUMAN;sp|P01127|PDGFB_HUMAN	0.0016304	5.005	sp|P01127-2|PDGFB_HUMAN;sp|P01127|PDGFB_HUMAN	2	3	13.3	25.502	226	907800000	71	75650000	0	1	0	0	6	6	0	12	12
LDLR	P01130-3	LDLR_HUMAN	+	cellmembrane																								Isoform 3 of Low-density lipoprotein receptor OS=Homo sapiens OX=9606 GN=LDLR;Isoform 6 of Low-density lipoprotein receptor OS=Homo sapiens OX=9606 GN=LDLR;Isoform 4 of Low-density lipoprotein receptor OS=Homo sapiens OX=9606 GN=LDLR;Low-density lipoprotei	sp|P01130-3|LDLR_HUMAN;sp|P01130-6|LDLR_HUMAN;sp|P01130-4|LDLR_HUMAN;sp|P01130|LDLR_HUMAN;sp|P01130-5|LDLR_HUMAN;sp|P01130-2|LDLR_HUMAN	0	17.645	sp|P01130-3|LDLR_HUMAN;sp|P01130-6|LDLR_HUMAN;sp|P01130-4|LDLR_HUMAN;sp|P01130|LDLR_HUMAN;sp|P01130-5|LDLR_HUMAN;sp|P01130-2|LDLR_HUMAN	6	9	21.1	76.855	692	314130000	54	8054700	1	1	1	0	2	2	1	4	5
EGF	P01133	EGF_HUMAN	+	cellmembrane		Endosome	+		+		+																	Pro-epidermal growth factor OS=Homo sapiens OX=9606 GN=EGF PE=1 SV=2;Isoform 3 of Pro-epidermal growth factor OS=Homo sapiens OX=9606 GN=EGF;Isoform 2 of Pro-epidermal growth factor OS=Homo sapiens OX=9606 GN=EGF	sp|P01133|EGF_HUMAN;sp|P01133-3|EGF_HUMAN;sp|P01133-2|EGF_HUMAN	0	55.993	sp|P01133|EGF_HUMAN;sp|P01133-3|EGF_HUMAN;sp|P01133-2|EGF_HUMAN	3	17	21.5	133.99	1207	1878900000	287	34795000	1	1	1	2	11	11	3	22	25
TGFB1	P01137	TGFB1_HUMAN	+	cellsurface				+		+	+																	Transforming growth factor beta-1 proprotein OS=Homo sapiens OX=9606 GN=TGFB1 PE=1 SV=2	sp|P01137|TGFB1_HUMAN	0	323.31	sp|P01137|TGFB1_HUMAN;sp|P61812|TGFB2_HUMAN;sp|P61812-2|TGFB2_HUMAN	3	27	65.9	44.341	390	61635000000	2972	3081800000	1	1	10	12	12	12	22	24	46
IGF2	P01344	IGF2_HUMAN	+	cellsurface																								Insulin-like growth factor II OS=Homo sapiens OX=9606 GN=IGF2 PE=1 SV=1;Isoform 2 of Insulin-like growth factor II OS=Homo sapiens OX=9606 GN=IGF2;Isoform 3 of Insulin-like growth factor II OS=Homo sapiens OX=9606 GN=IGF2	sp|P01344|IGF2_HUMAN;sp|P01344-2|IGF2_HUMAN;sp|P01344-3|IGF2_HUMAN	0.0090703	1.8395	sp|P01344|IGF2_HUMAN;sp|P01344-2|IGF2_HUMAN;sp|P01344-3|IGF2_HUMAN	3	2	13.3	20.14	180	159220000	18	19902000	1	1	4	2	1	1	6	2	8
JCHAIN	P01591	IGJ_HUMAN	+	serum/plasma	IG		+	+	+	+																		Immunoglobulin J chain OS=Homo sapiens OX=9606 GN=JCHAIN PE=1 SV=4	sp|P01591|IGJ_HUMAN	0	292.72	sp|P01591|IGJ_HUMAN	1	18	71.7	18.098	159	165500000000	2551	20687000000	1	1	12	12	12	12	24	24	48
IGKV1-33	P01594	KV133_HUMAN	+	serum/plasma	IG			+		+																		Immunoglobulin kappa variable 1-33 OS=Homo sapiens OX=9606 GN=IGKV1-33 PE=1 SV=2;Immunoglobulin kappa variable 1D-33 OS=Homo sapiens OX=9606 GN=IGKV1D-33 PE=1 SV=2	sp|P01594|KV133_HUMAN;sp|P01593|KVD33_HUMAN	0	97.914	sp|P01594|KV133_HUMAN;sp|P01593|KVD33_HUMAN	2	3	53	12.848	117	5791700000	378	1447900000	1	1	12	12	12	12	24	24	48
IGKV1-17	P01599	KV117_HUMAN	+	serum/plasma	IG		+	+	+	+																		Immunoglobulin kappa variable 1-17 OS=Homo sapiens OX=9606 GN=IGKV1-17 PE=1 SV=2	sp|P01599|KV117_HUMAN	0	24.138	sp|P01599|KV117_HUMAN	1	7	47.9	12.778	117	7846000000	324	1961500000	1	1	10	10	11	11	20	22	42
IGKV1-5	P01602	KV105_HUMAN	+	serum/plasma	IG		+	+	+	+																		Immunoglobulin kappa variable 1-5 OS=Homo sapiens OX=9606 GN=IGKV1-5 PE=1 SV=2	sp|P01602|KV105_HUMAN	0	66.685	sp|P01602|KV105_HUMAN	1	2	27.4	12.781	117	4183800000	164	1045900000	1	1	9	8	10	9	17	19	36
IGKV1D-12	P01611	KVD12_HUMAN	+	serum/plasma	IG		+	+	+	+																		Immunoglobulin kappa variable 1D-12 OS=Homo sapiens OX=9606 GN=IGKV1D-12 PE=1 SV=2;Immunoglobulin kappa variable 1-12 OS=Homo sapiens OX=9606 GN=IGKV1-12 PE=3 SV=1	sp|P01611|KVD12_HUMAN;sp|A0A0C4DH73|KV112_HUMAN	0.00065488	11.028	sp|P01611|KVD12_HUMAN;sp|A0A0C4DH73|KV112_HUMAN	2	2	31.6	12.62	117	1485800000	82	371440000	1	1	4	4	2	1	8	3	11
IGKV2D-40	P01614	KVD40_HUMAN	+	serum/plasma	IG		+	+	+	+																		Immunoglobulin kappa variable 2D-40 OS=Homo sapiens OX=9606 GN=IGKV2D-40 PE=1 SV=2;Immunoglobulin kappa variable 2-40 OS=Homo sapiens OX=9606 GN=IGKV2-40 PE=3 SV=2	sp|P01614|KVD40_HUMAN;sp|A0A087WW87|KV240_HUMAN	0	98.355	sp|P01614|KVD40_HUMAN;sp|A0A087WW87|KV240_HUMAN	2	5	60.3	13.31	121	65614000000	742	21871000000	1	1	12	12	12	12	24	24	48
IGKV3-20	P01619	KV320_HUMAN	+	serum/plasma	IG		+	+	+	+																		Immunoglobulin kappa variable 3-20 OS=Homo sapiens OX=9606 GN=IGKV3-20 PE=1 SV=2	sp|P01619|KV320_HUMAN	0	323.31	sp|P01619|KV320_HUMAN	1	4	46.6	12.557	116	112320000000	1584	22464000000	1	1	12	12	12	12	24	24	48
IGLV1-47	P01700	LV147_HUMAN	+	serum/plasma	IG			+		+																		Immunoglobulin lambda variable 1-47 OS=Homo sapiens OX=9606 GN=IGLV1-47 PE=1 SV=2	sp|P01700|LV147_HUMAN	0	15.74	sp|P01700|LV147_HUMAN	1	4	53.8	12.283	117	29720000000	307	7429900000	1	1	8	7	12	12	15	24	39
IGLV1-51	P01701	LV151_HUMAN	+	serum/plasma	IG		+		+																			Immunoglobulin lambda variable 1-51 OS=Homo sapiens OX=9606 GN=IGLV1-51 PE=1 SV=2	sp|P01701|LV151_HUMAN	0	55.26	sp|P01701|LV151_HUMAN	1	5	42.7	12.249	117	25736000000	220	8578600000	1	1	3	2	10	10	5	20	25
IGLV1-40	P01703	LV140_HUMAN	+	serum/plasma	IG																							Immunoglobulin lambda variable 1-40 OS=Homo sapiens OX=9606 GN=IGLV1-40 PE=1 SV=2	sp|P01703|LV140_HUMAN	0	27.893	sp|P01703|LV140_HUMAN	1	3	43.2	12.301	118	9334500000	236	4667200000	1	1	7	8	9	9	15	18	33
IGLV2-11	P01706	LV211_HUMAN	+	serum/plasma	IG																							Immunoglobulin lambda variable 2-11 OS=Homo sapiens OX=9606 GN=IGLV2-11 PE=1 SV=2	sp|P01706|LV211_HUMAN	0	55.884	sp|P01706|LV211_HUMAN	1	4	50.4	12.644	119	1781100000	87	593690000	1	1	3	3	4	6	6	10	16
IGLV3-19	P01714	LV319_HUMAN	+	serum/plasma	IG		+		+																			Immunoglobulin lambda variable 3-19 OS=Homo sapiens OX=9606 GN=IGLV3-19 PE=1 SV=2	sp|P01714|LV319_HUMAN	0	123.05	sp|P01714|LV319_HUMAN	1	4	63.4	12.042	112	885290000	101	221320000	1	1	4	3	2	3	7	5	12
IGLV3-1	P01715	LV301_HUMAN	+	serum/plasma	IG																							Immunoglobulin lambda variable 3-1 OS=Homo sapiens OX=9606 GN=IGLV3-1 PE=1 SV=2	sp|P01715|LV301_HUMAN	0.0014808	3.0388	sp|P01715|LV301_HUMAN	1	2	26.1	12.296	115	292130000	16	146060000	1	1	2	2	1	1	4	2	6
IGLV3-25	P01717	LV325_HUMAN	+	serum/plasma	IG			+		+																		Immunoglobulin lambda variable 3-25 OS=Homo sapiens OX=9606 GN=IGLV3-25 PE=1 SV=2	sp|P01717|LV325_HUMAN	0	24.594	sp|P01717|LV325_HUMAN	1	3	36.6	12.011	112	4493800000	219	1497900000	1	1	9	9	6	7	18	13	31
IGLV6-57	P01721	LV657_HUMAN	+	serum/plasma	IG																							Immunoglobulin lambda variable 6-57 OS=Homo sapiens OX=9606 GN=IGLV6-57 PE=1 SV=2	sp|P01721|LV657_HUMAN	0	29.332	sp|P01721|LV657_HUMAN	1	2	56.4	12.566	117	203960000	25	101980000	1	1	1	1	0	3	2	3	5
IGHV1-69	P01742	HV169_HUMAN	+	serum/plasma	IG																							Immunoglobulin heavy variable 1-69 OS=Homo sapiens OX=9606 GN=IGHV1-69 PE=1 SV=2;Immunoglobulin heavy variable 1-69D OS=Homo sapiens OX=9606 GN=IGHV1-69D PE=1 SV=1	sp|P01742|HV169_HUMAN;sp|A0A0B4J2H0|HV69D_HUMAN	0	46.245	sp|P01742|HV169_HUMAN;sp|A0A0B4J2H0|HV69D_HUMAN	2	4	54.7	12.659	117	8702200000	348	1243200000	1	1	12	12	12	12	24	24	48
IGHV1-46	P01743	HV146_HUMAN	+	serum/plasma	IG																							Immunoglobulin heavy variable 1-46 OS=Homo sapiens OX=9606 GN=IGHV1-46 PE=1 SV=2	sp|P01743|HV146_HUMAN	0.001233	8.8252	sp|P01743|HV146_HUMAN	1	3	56.4	12.933	117	335950000	74	55991000	1	1	6	5	2	2	11	4	15
IGHV3-23	P01764	HV323_HUMAN	+	serum/plasma	IG		+	+	+	+																		Immunoglobulin heavy variable 3-23 OS=Homo sapiens OX=9606 GN=IGHV3-23 PE=1 SV=2	sp|P01764|HV323_HUMAN	0	104.98	sp|P01764|HV323_HUMAN	1	11	67.5	12.582	117	47222000000	937	7870400000	1	1	12	12	12	12	24	24	48
IGHV3-13	P01766	HV313_HUMAN	+	serum/plasma	IG			+		+																		Immunoglobulin heavy variable 3-13 OS=Homo sapiens OX=9606 GN=IGHV3-13 PE=1 SV=2	sp|P01766|HV313_HUMAN	0	14.198	sp|P01766|HV313_HUMAN	1	2	35.3	12.506	116	1118600000	79	279650000	1	1	4	4	7	7	8	14	22
IGHV3-33	P01772	HV333_HUMAN	+	serum/plasma	IG																							Immunoglobulin heavy variable 3-33 OS=Homo sapiens OX=9606 GN=IGHV3-33 PE=1 SV=2	sp|P01772|HV333_HUMAN	0.0017133	6.2346	sp|P01772|HV333_HUMAN	1	3	63.2	13.074	117	55042000	9	7863200	0	0	0	0	0	0	0	0	0
IGHV3-7	P01780	HV307_HUMAN	+	serum/plasma	IG		+	+	+	+																		Immunoglobulin heavy variable 3-7 OS=Homo sapiens OX=9606 GN=IGHV3-7 PE=1 SV=2	sp|P01780|HV307_HUMAN	0	41.217	sp|P01780|HV307_HUMAN	1	9	65.8	12.943	117	26201000000	667	5240100000	1	1	12	12	12	12	24	24	48
IGHV3-9	P01782	HV309_HUMAN	+	serum/plasma	IG		+		+																			Immunoglobulin heavy variable 3-9 OS=Homo sapiens OX=9606 GN=IGHV3-9 PE=1 SV=2	sp|P01782|HV309_HUMAN	0	41.104	sp|P01782|HV309_HUMAN	1	4	61	12.945	118	5568000000	481	928010000	1	1	11	10	11	11	21	22	43
IGHV2-5	P01817	HV205_HUMAN	+	serum/plasma	IG																							Immunoglobulin heavy variable 2-5 OS=Homo sapiens OX=9606 GN=IGHV2-5 PE=1 SV=2	sp|P01817|HV205_HUMAN	0	35.032	sp|P01817|HV205_HUMAN	1	6	69.7	13.231	119	726600000	143	242200000	1	1	9	8	6	6	17	12	29
PIGR	P01833	PIGR_HUMAN	+	cellmembrane			+		+																			Polymeric immunoglobulin receptor OS=Homo sapiens OX=9606 GN=PIGR PE=1 SV=4	sp|P01833|PIGR_HUMAN	0	149.27	sp|P01833|PIGR_HUMAN	1	16	34	83.283	764	1489000000	253	37225000	1	1	5	6	6	6	11	12	23
IGKC	P01834	IGKC_HUMAN	+	serum/plasma	IG		+	+	+	+	+																	Immunoglobulin kappa constant OS=Homo sapiens OX=9606 GN=IGKC PE=1 SV=2	sp|P01834|IGKC_HUMAN	0	323.31	sp|P01834|IGKC_HUMAN	1	22	100	11.765	107	4761300000000	21574	952250000000	1	1	12	12	12	12	24	24	48
IGHG2	P01859	IGHG2_HUMAN	+	serum/plasma	IG		+	+	+	+	+																	Immunoglobulin heavy constant gamma 2 OS=Homo sapiens OX=9606 GN=IGHG2 PE=1 SV=2	sp|P01859|IGHG2_HUMAN	0	323.31	sp|P01859|IGHG2_HUMAN	1	22	74.8	35.9	326	1032800000000	10450	79449000000	1	1	12	12	12	12	24	24	48
IGHG3	P01860	IGHG3_HUMAN	+	serum/plasma	IG		+	+	+	+	+																	Immunoglobulin heavy constant gamma 3 OS=Homo sapiens OX=9606 GN=IGHG3 PE=1 SV=2	sp|P01860|IGHG3_HUMAN	0	323.31	sp|P01860|IGHG3_HUMAN	1	25	74.8	41.287	377	1081800000000	10763	63636000000	1	1	12	12	12	12	24	24	48
IGHG4	P01861	IGHG4_HUMAN	+	serum/plasma	IG		+	+	+	+	+																	Immunoglobulin heavy constant gamma 4 OS=Homo sapiens OX=9606 GN=IGHG4 PE=1 SV=1	sp|P01861|IGHG4_HUMAN	0	323.31	sp|P01861|IGHG4_HUMAN	1	25	92.4	35.94	327	140940000000	4116	10067000000	1	1	12	12	12	12	24	24	48
IGHM	P01871	IGHM_HUMAN	+	serum/plasma	IG		+	+	+	+	+																	Immunoglobulin heavy constant mu OS=Homo sapiens OX=9606 GN=IGHM PE=1 SV=4;Isoform 2 of Immunoglobulin heavy constant mu OS=Homo sapiens OX=9606 GN=IGHM	sp|P01871|IGHM_HUMAN;sp|P01871-2|IGHM_HUMAN	0	323.31	sp|P01871|IGHM_HUMAN;sp|P01871-2|IGHM_HUMAN	2	69	89.6	49.439	453	3729400000000	30233	149180000000	1	1	12	12	12	12	24	24	48
IGHA1	P01876	IGHA1_HUMAN	+	serum/plasma	IG		+	+	+	+	+																	Immunoglobulin heavy constant alpha 1 OS=Homo sapiens OX=9606 GN=IGHA1 PE=1 SV=2	sp|P01876|IGHA1_HUMAN	0	323.31	sp|P01876|IGHA1_HUMAN	1	31	79.6	37.654	353	2026200000000	10098	135080000000	1	1	12	12	12	12	24	24	48
HLA-DQA2	P01906	DQA2_HUMAN	+	cellmembrane		Endosome																						HLA class II histocompatibility antigen, DQ alpha 2 chain OS=Homo sapiens OX=9606 GN=HLA-DQA2 PE=1 SV=2;HLA class II histocompatibility antigen, DR alpha chain OS=Homo sapiens OX=9606 GN=HLA-DRA PE=1 SV=1	sp|P01906|DQA2_HUMAN;sp|P01903|DRA_HUMAN	0.0019541	2.8462	sp|P01906|DQA2_HUMAN;sp|P01903|DRA_HUMAN	2	2	12.2	28.033	255	93902000	9	13415000	0	1	0	0	1	1	0	2	2
HBD	P02042	HBD_HUMAN	+	cellpart				+		+	+																	Hemoglobin subunit delta OS=Homo sapiens OX=9606 GN=HBD PE=1 SV=2	sp|P02042|HBD_HUMAN	0	131.25	sp|P02042|HBD_HUMAN	1	9	95.2	16.055	147	11350000000	648	1031800000	1	1	11	11	11	11	22	22	44
KRT14	P02533	K1C14_HUMAN	+	cellpart			+		+		+																+	Keratin, type I cytoskeletal 14 OS=Homo sapiens OX=9606 GN=KRT14 PE=1 SV=4;	sp|P02533|K1C14_HUMAN;CON__sp|P02533|K1C14_HUMAN	0	39.994	sp|P02533|K1C14_HUMAN;CON__sp|P02533|K1C14_HUMAN;sp|P35900|K1C20_HUMAN;CON__sp|P35900|K1C20_HUMAN;sp|Q8N1A0-2|KT222_HUMAN;CON__sp|Q8N1A0-2|KT222_HUMAN;sp|Q8N1A0|KT222_HUMAN;CON__sp|Q8N1A0|KT222_HUMAN	8	19	69.5	51.561	472	2400600000	138	80020000	1	0	10	11	0	0	21	0	21
LMNA	P02545-2	LMNA_HUMAN	+	cellpart							+																	Isoform C of Prelamin-A/C OS=Homo sapiens OX=9606 GN=LMNA;Isoform 6 of Prelamin-A/C OS=Homo sapiens OX=9606 GN=LMNA;Isoform ADelta10 of Prelamin-A/C OS=Homo sapiens OX=9606 GN=LMNA;Prelamin-A/C OS=Homo sapiens OX=9606 GN=LMNA PE=1 SV=1;Isoform 4 of Prelami	sp|P02545-2|LMNA_HUMAN;sp|P02545-6|LMNA_HUMAN;sp|P02545-3|LMNA_HUMAN;sp|P02545|LMNA_HUMAN;sp|P02545-4|LMNA_HUMAN	0.0064845	2.09	sp|P02545-2|LMNA_HUMAN;sp|P02545-6|LMNA_HUMAN;sp|P02545-3|LMNA_HUMAN;sp|P02545|LMNA_HUMAN;sp|P02545-4|LMNA_HUMAN	5	6	13.6	65.134	572	155740000	6	4209100	1	0	0	1	0	0	1	0	1
SPTA1	P02549	SPTA1_HUMAN	+	cellpart							+																	Spectrin alpha chain, erythrocytic 1 OS=Homo sapiens OX=9606 GN=SPTA1 PE=1 SV=5;Isoform 2 of Spectrin alpha chain, erythrocytic 1 OS=Homo sapiens OX=9606 GN=SPTA1	sp|P02549|SPTA1_HUMAN;sp|P02549-2|SPTA1_HUMAN	0	323.31	sp|P02549|SPTA1_HUMAN;sp|P02549-2|SPTA1_HUMAN	2	195	80.1	280.01	2419	72525000000	10880	553630000	1	1	12	12	12	12	24	24	48
APOA1	P02647	APOA1_HUMAN	+	serum/plasma	apolipo		+	+	+	+	+																	Apolipoprotein A-I OS=Homo sapiens OX=9606 GN=APOA1 PE=1 SV=1	sp|P02647|APOA1_HUMAN	0	323.31	sp|P02647|APOA1_HUMAN	1	72	92.9	30.777	267	3815000000000	23428	211950000000	1	1	12	12	12	12	24	24	48
APOE	P02649	APOE_HUMAN	+	serum/plasma	apolipo		+	+	+	+	+																	Apolipoprotein E OS=Homo sapiens OX=9606 GN=APOE PE=1 SV=1	sp|P02649|APOE_HUMAN	0	323.31	sp|P02649|APOE_HUMAN	1	47	86.1	36.154	317	1051000000000	9759	47773000000	1	1	12	12	12	12	24	24	48
APOA2	P02652	APOA2_HUMAN	+	serum/plasma	apolipo		+	+	+	+	+																	Apolipoprotein A-II OS=Homo sapiens OX=9606 GN=APOA2 PE=1 SV=1	sp|P02652|APOA2_HUMAN	0	323.31	sp|P02652|APOA2_HUMAN	1	19	77	11.175	100	804240000000	7192	160850000000	1	1	12	12	12	12	24	24	48
APOC1	P02654	APOC1_HUMAN	+	serum/plasma	apolipo						+																	Apolipoprotein C-I OS=Homo sapiens OX=9606 GN=APOC1 PE=1 SV=1	sp|P02654|APOC1_HUMAN	0	120.96	sp|P02654|APOC1_HUMAN	1	9	44.6	9.3318	83	148280000000	1896	49426000000	1	1	12	12	12	12	24	24	48
APOC2	P02655	APOC2_HUMAN	+	serum/plasma	apolipo																							Apolipoprotein C-II OS=Homo sapiens OX=9606 GN=APOC2 PE=1 SV=1	sp|P02655|APOC2_HUMAN	0	323.31	sp|P02655|APOC2_HUMAN	1	14	96	11.284	101	326990000000	2729	81747000000	1	1	12	12	12	12	24	24	48
APOC3	P02656	APOC3_HUMAN	+	serum/plasma	apolipo		+		+		+																	Apolipoprotein C-III OS=Homo sapiens OX=9606 GN=APOC3 PE=1 SV=1	sp|P02656|APOC3_HUMAN	0	323.31	sp|P02656|APOC3_HUMAN	1	12	62.6	10.852	99	2558900000000	7168	426490000000	1	1	12	12	12	12	24	24	48
FGA	P02671	FIBA_HUMAN	+	serum/plasma	coag		+	+	+	+	+																	Fibrinogen alpha chain OS=Homo sapiens OX=9606 GN=FGA PE=1 SV=2;Isoform 2 of Fibrinogen alpha chain OS=Homo sapiens OX=9606 GN=FGA	sp|P02671|FIBA_HUMAN;sp|P02671-2|FIBA_HUMAN	0	323.31	sp|P02671|FIBA_HUMAN;sp|P02671-2|FIBA_HUMAN	2	159	72.1	94.972	866	27848000000000	70071	795650000000	1	1	12	12	12	12	24	24	48
FGB	P02675	FIBB_HUMAN	+	serum/plasma	coag		+	+	+	+	+																	Fibrinogen beta chain OS=Homo sapiens OX=9606 GN=FGB PE=1 SV=2	sp|P02675|FIBB_HUMAN	0	323.31	sp|P02675|FIBB_HUMAN	1	121	91	55.928	491	33909000000000	97438	1169300000000	1	1	12	12	12	12	24	24	48
FGG	P02679-2	FIBG_HUMAN	+	serum/plasma	coag		+	+	+	+	+																	Isoform Gamma-A of Fibrinogen gamma chain OS=Homo sapiens OX=9606 GN=FGG	sp|P02679-2|FIBG_HUMAN	0	323.31	sp|P02679-2|FIBG_HUMAN	1	90	100	49.496	437	18070000000000	45371	694990000000	1	1	12	12	12	12	24	24	48
CRP	P02741	CRP_HUMAN	+	serum/plasma	other																							C-reactive protein OS=Homo sapiens OX=9606 GN=CRP PE=1 SV=1;Isoform 2 of C-reactive protein OS=Homo sapiens OX=9606 GN=CRP	sp|P02741|CRP_HUMAN;sp|P02741-2|CRP_HUMAN	0	13.586	sp|P02741|CRP_HUMAN;sp|P02741-2|CRP_HUMAN	2	6	25.9	25.038	224	435350000	34	62193000	1	1	2	3	3	3	5	6	11
APCS	P02743	SAMP_HUMAN	+	serum/plasma	other		+	+	+	+	+																	Serum amyloid P-component OS=Homo sapiens OX=9606 GN=APCS PE=1 SV=2	sp|P02743|SAMP_HUMAN	0	16.159	sp|P02743|SAMP_HUMAN	1	6	26.5	25.387	223	2382600000	235	238260000	1	1	7	7	4	5	14	9	23
C1QA	P02745	C1QA_HUMAN	+	serum/plasma	compl																							Complement C1q subcomponent subunit A OS=Homo sapiens OX=9606 GN=C1QA PE=1 SV=2	sp|P02745|C1QA_HUMAN	0	323.31	sp|P02745|C1QA_HUMAN	1	19	55.1	26.016	245	83779000000	2660	6444600000	1	1	12	12	12	12	24	24	48
C1QB	P02746	C1QB_HUMAN	+	serum/plasma	compl			+		+																		Complement C1q subcomponent subunit B OS=Homo sapiens OX=9606 GN=C1QB PE=1 SV=3	sp|P02746|C1QB_HUMAN	0	280.05	sp|P02746|C1QB_HUMAN	1	15	50.2	26.721	253	136000000000	1800	11333000000	1	1	12	12	12	12	24	24	48
C1QC	P02747	C1QC_HUMAN	+	serum/plasma	compl			+		+																		Complement C1q subcomponent subunit C OS=Homo sapiens OX=9606 GN=C1QC PE=1 SV=3	sp|P02747|C1QC_HUMAN	0	221.94	sp|P02747|C1QC_HUMAN	1	18	50.6	25.773	245	200310000000	1399	15408000000	1	1	12	12	12	12	24	24	48
C9	P02748	CO9_HUMAN	+	serum/plasma	coag		+	+	+	+	+																	Complement component C9 OS=Homo sapiens OX=9606 GN=C9 PE=1 SV=2	sp|P02748|CO9_HUMAN	0	323.31	sp|P02748|CO9_HUMAN;REV__sp|Q4AC99|1A1L2_HUMAN	2	53	77.5	63.173	559	234370000000	8112	9014200000	1	1	12	12	12	12	24	24	48
APOH	P02749	APOH_HUMAN	+	serum/plasma	apolipo		+		+		+																	Beta-2-glycoprotein 1 OS=Homo sapiens OX=9606 GN=APOH PE=1 SV=3	sp|P02749|APOH_HUMAN	0	323.31	sp|P02749|APOH_HUMAN	1	43	81.2	38.298	345	3736900000000	18765	219820000000	1	1	12	12	12	12	24	24	48
LRG1	P02750	A2GL_HUMAN	+	serum/plasma	other		+		+																			Leucine-rich alpha-2-glycoprotein OS=Homo sapiens OX=9606 GN=LRG1 PE=1 SV=2	sp|P02750|A2GL_HUMAN	0	260.9	sp|P02750|A2GL_HUMAN	1	16	53.3	38.177	347	14065000000	1070	827360000	1	1	9	10	12	12	19	24	43
FN1	P02751	FINC_HUMAN	+	cellsurface			+	+	+	+	+																	Fibronectin OS=Homo sapiens OX=9606 GN=FN1 PE=1 SV=4;Isoform 3 of Fibronectin OS=Homo sapiens OX=9606 GN=FN1;Isoform 15 of Fibronectin OS=Homo sapiens OX=9606 GN=FN1;Isoform 7 of Fibronectin OS=Homo sapiens OX=9606 GN=FN1;Isoform 17 of Fibronectin OS=Homo	sp|P02751|FINC_HUMAN;sp|P02751-3|FINC_HUMAN;sp|P02751-15|FINC_HUMAN;sp|P02751-7|FINC_HUMAN;sp|P02751-17|FINC_HUMAN;sp|P02751-11|FINC_HUMAN;sp|P02751-6|FINC_HUMAN;sp|P02751-4|FINC_HUMAN	0	323.31	sp|P02751|FINC_HUMAN;sp|P02751-3|FINC_HUMAN;sp|P02751-15|FINC_HUMAN;sp|P02751-7|FINC_HUMAN;sp|P02751-17|FINC_HUMAN;sp|P02751-11|FINC_HUMAN;sp|P02751-6|FINC_HUMAN;sp|P02751-4|FINC_HUMAN;sp|P02751-16|FINC_HUMAN;sp|P02751-2|FINC_HUMAN	10	203	78.3	262.62	2386	3208600000000	36238	33423000000	1	1	12	12	12	12	24	24	48
RBP4	P02753	RET4_HUMAN	+	cellsurface			+		+		+																	Retinol-binding protein 4 OS=Homo sapiens OX=9606 GN=RBP4 PE=1 SV=3	sp|P02753|RET4_HUMAN	0	228.42	sp|P02753|RET4_HUMAN	1	15	76.1	23.01	201	33052000000	1836	3305200000	1	1	12	12	12	12	24	24	48
AMBP	P02760	AMBP_HUMAN	+	serum/plasma	other		+	+	+	+	+																	Protein AMBP OS=Homo sapiens OX=9606 GN=AMBP PE=1 SV=1	sp|P02760|AMBP_HUMAN	0	323.31	sp|P02760|AMBP_HUMAN	1	31	60.5	38.999	352	90715000000	4078	5669700000	1	1	12	12	12	12	24	24	48
ORM1	P02763	A1AG1_HUMAN	+	serum/plasma	other		+	+	+	+	+																	Alpha-1-acid glycoprotein 1 OS=Homo sapiens OX=9606 GN=ORM1 PE=1 SV=1	sp|P02763|A1AG1_HUMAN	0	323.31	sp|P02763|A1AG1_HUMAN	1	24	54.2	23.511	201	284400000000	3604	28440000000	1	1	12	12	12	12	24	24	48
AHSG	P02765	FETUA_HUMAN	+	serum/plasma	other		+	+	+	+	+																	Alpha-2-HS-glycoprotein OS=Homo sapiens OX=9606 GN=AHSG PE=1 SV=2	sp|P02765|FETUA_HUMAN	0	323.31	sp|P02765|FETUA_HUMAN	1	27	61.6	39.34	367	362680000000	8208	27898000000	1	1	12	12	12	12	24	24	48
TTR	P02766	TTHY_HUMAN	+	serum/plasma	other		+		+		+																	Transthyretin OS=Homo sapiens OX=9606 GN=TTR PE=1 SV=1	sp|P02766|TTHY_HUMAN	0	323.31	sp|P02766|TTHY_HUMAN	1	14	73.5	15.887	147	82467000000	3513	13745000000	1	1	12	12	12	12	24	24	48
ALB	P02768	ALBU_HUMAN	+	serum/plasma	other		+	+	+	+	+																	Serum albumin OS=Homo sapiens OX=9606 GN=ALB PE=1 SV=2;Isoform 2 of Serum albumin OS=Homo sapiens OX=9606 GN=ALB;Isoform 3 of Serum albumin OS=Homo sapiens OX=9606 GN=ALB	sp|P02768|ALBU_HUMAN;sp|P02768-2|ALBU_HUMAN;sp|P02768-3|ALBU_HUMAN	0	323.31	sp|P02768|ALBU_HUMAN;sp|P02768-2|ALBU_HUMAN;sp|P02768-3|ALBU_HUMAN	3	190	96.1	69.366	609	57137000000000	173730	1544300000000	1	1	12	12	12	12	24	24	48
GC	P02774-3	VTDB_HUMAN	+	serum/plasma	other		+	+	+	+	+																	Isoform 3 of Vitamin D-binding protein OS=Homo sapiens OX=9606 GN=GC;Vitamin D-binding protein OS=Homo sapiens OX=9606 GN=GC PE=1 SV=2;Isoform 2 of Vitamin D-binding protein OS=Homo sapiens OX=9606 GN=GC	sp|P02774-3|VTDB_HUMAN;sp|P02774|VTDB_HUMAN;sp|P02774-2|VTDB_HUMAN	0	323.31	sp|P02774-3|VTDB_HUMAN;sp|P02774|VTDB_HUMAN;sp|P02774-2|VTDB_HUMAN	3	62	79.5	55.076	493	541440000000	10879	18670000000	1	1	12	12	12	12	24	24	48
PPBP	P02775	CXCL7_HUMAN	+	cellsurface							+																	Platelet basic protein OS=Homo sapiens OX=9606 GN=PPBP PE=1 SV=3	sp|P02775|CXCL7_HUMAN	0	323.31	sp|P02775|CXCL7_HUMAN	1	21	66.4	13.894	128	2541500000000	6831	423590000000	1	1	12	12	12	12	24	24	48
PF4	P02776	PLF4_HUMAN	+	cellsurface							+																	Platelet factor 4 OS=Homo sapiens OX=9606 GN=PF4 PE=1 SV=2	sp|P02776|PLF4_HUMAN	0	246.47	sp|P02776|PLF4_HUMAN	1	6	50.5	10.845	101	804510000000	1969	201130000000	1	1	12	12	12	12	24	24	48
TF	P02787	TRFE_HUMAN	+	serum/plasma	other		+	+	+	+	+																	Serotransferrin OS=Homo sapiens OX=9606 GN=TF PE=1 SV=3	sp|P02787|TRFE_HUMAN	0	323.31	sp|P02787|TRFE_HUMAN	1	119	91.3	77.063	698	2883400000000	27995	72084000000	1	1	12	12	12	12	24	24	48
LTF	P02788	TRFL_HUMAN	+	cellpart			+		+		+																	Lactotransferrin OS=Homo sapiens OX=9606 GN=LTF PE=1 SV=6;Isoform DeltaLf of Lactotransferrin OS=Homo sapiens OX=9606 GN=LTF	sp|P02788|TRFL_HUMAN;sp|P02788-2|TRFL_HUMAN	0	318.59	sp|P02788|TRFL_HUMAN;sp|P02788-2|TRFL_HUMAN	2	45	67.3	78.181	710	8291600000	1057	180250000	1	1	10	10	8	9	20	17	37
HPX	P02790	HEMO_HUMAN	+	cellsurface			+	+	+	+	+																	Hemopexin OS=Homo sapiens OX=9606 GN=HPX PE=1 SV=2	sp|P02790|HEMO_HUMAN	0	323.31	sp|P02790|HEMO_HUMAN	1	45	73.8	51.676	462	409680000000	7697	18622000000	1	1	12	12	12	12	24	24	48
SMR3B	P02814	SMR3B_HUMAN	+	serum/plasma	other		+		+																			Submaxillary gland androgen-regulated protein 3B OS=Homo sapiens OX=9606 GN=SMR3B PE=1 SV=2	sp|P02814|SMR3B_HUMAN	0.0012063	7.8161	sp|P02814|SMR3B_HUMAN	1	2	65.8	8.1875	79	11251000	11	5625600	0	0	0	0	0	0	0	0	0
MT-ATP8	P03928	ATP8_HUMAN	+	cellmembrane							+																	ATP synthase protein 8 OS=Homo sapiens OX=9606 GN=MT-ATP8 PE=1 SV=1	sp|P03928|ATP8_HUMAN	0.0016199	4.827	sp|P03928|ATP8_HUMAN	1	4	55.9	7.9916	68	2190500000	176	547620000	1	1	0	1	11	11	1	22	23
ANG	P03950	ANGI_HUMAN	+	cellpart																								Angiogenin OS=Homo sapiens OX=9606 GN=ANG PE=1 SV=1	sp|P03950|ANGI_HUMAN	0.0012034	7.7423	sp|P03950|ANGI_HUMAN	1	7	61.2	16.55	147	1705700000	103	213220000	1	1	10	7	9	9	17	18	35
KLKB1	P03952	KLKB1_HUMAN	+	serum/plasma	coag		+		+																			Plasma kallikrein OS=Homo sapiens OX=9606 GN=KLKB1 PE=1 SV=1	sp|P03952|KLKB1_HUMAN	0	92.932	sp|P03952|KLKB1_HUMAN	1	30	60.3	71.369	638	6103400000	673	164960000	1	1	11	11	12	12	22	24	46
MMP1	P03956	MMP1_HUMAN	+	cellsurface																								Interstitial collagenase OS=Homo sapiens OX=9606 GN=MMP1 PE=1 SV=3	sp|P03956|MMP1_HUMAN	0	30.193	sp|P03956|MMP1_HUMAN	1	10	38.4	54.006	469	868480000	109	41356000	1	1	1	1	4	4	2	8	10
SLPI	P03973	SLPI_HUMAN	+	cellsurface			+		+																			Antileukoproteinase OS=Homo sapiens OX=9606 GN=SLPI PE=1 SV=2	sp|P03973|SLPI_HUMAN	0.0015831	4.3715	sp|P03973|SLPI_HUMAN	1	2	20.5	14.326	132	196220000	8	24527000	0	0	0	0	0	0	0	0	0
C4BPA	P04003	C4BPA_HUMAN	+	serum/plasma	compl			+		+	+																	C4b-binding protein alpha chain OS=Homo sapiens OX=9606 GN=C4BPA PE=1 SV=2	sp|P04003|C4BPA_HUMAN	0	323.31	sp|P04003|C4BPA_HUMAN	1	57	78.6	67.033	597	635380000000	10853	21179000000	1	1	12	12	12	12	24	24	48
VTN	P04004	VTNC_HUMAN	+	cellsurface			+	+	+	+	+																	Vitronectin OS=Homo sapiens OX=9606 GN=VTN PE=1 SV=1	sp|P04004|VTNC_HUMAN	0	323.31	sp|P04004|VTNC_HUMAN	1	29	51	54.305	478	427230000000	6044	22486000000	1	1	12	12	12	12	24	24	48
CAT	P04040	CATA_HUMAN	+	cellmembrane		focal adhesion	+		+		+																	Catalase OS=Homo sapiens OX=9606 GN=CAT PE=1 SV=3	sp|P04040|CATA_HUMAN	0	323.31	sp|P04040|CATA_HUMAN	1	44	84.4	59.755	527	70757000000	4001	2439900000	1	1	12	12	12	12	24	24	48
PROC	P04070	PROC_HUMAN	+	serum/plasma	other																							Vitamin K-dependent protein C OS=Homo sapiens OX=9606 GN=PROC PE=1 SV=1;Isoform 2 of Vitamin K-dependent protein C OS=Homo sapiens OX=9606 GN=PROC	sp|P04070|PROC_HUMAN;sp|P04070-2|PROC_HUMAN	0.0017452	6.7134	sp|P04070|PROC_HUMAN;sp|P04070-2|PROC_HUMAN	2	4	18.4	52.071	461	258080000	55	15181000	1	1	5	5	3	3	10	6	16
ALDOA	P04075	ALDOA_HUMAN	+	cellpart			+		+		+																	Fructose-bisphosphate aldolase A OS=Homo sapiens OX=9606 GN=ALDOA PE=1 SV=2;Isoform 2 of Fructose-bisphosphate aldolase A OS=Homo sapiens OX=9606 GN=ALDOA	sp|P04075|ALDOA_HUMAN;sp|P04075-2|ALDOA_HUMAN	0	323.31	sp|P04075|ALDOA_HUMAN;sp|P04075-2|ALDOA_HUMAN	2	53	99.7	39.42	364	678360000000	8704	30835000000	1	1	12	12	12	12	24	24	48
ANXA1	P04083	ANXA1_HUMAN	+	cellsurface		Endosome	+		+		+																	Annexin A1 OS=Homo sapiens OX=9606 GN=ANXA1 PE=1 SV=2	sp|P04083|ANXA1_HUMAN	0	188.7	sp|P04083|ANXA1_HUMAN	1	17	59.8	38.714	346	1679100000	319	88376000	1	1	8	8	7	9	16	16	32
APOB	P04114	APOB_HUMAN	+	serum/plasma	apolipo		+		+		+																	Apolipoprotein B-100 OS=Homo sapiens OX=9606 GN=APOB PE=1 SV=2	sp|P04114|APOB_HUMAN	0	323.31	sp|P04114|APOB_HUMAN	1	603	83.9	515.6	4563	4961900000000	98104	19848000000	1	1	12	12	12	12	24	24	48
SOD2	P04179	SODM_HUMAN	+	cellpart			+		+		+																	Superoxide dismutase [Mn], mitochondrial OS=Homo sapiens OX=9606 GN=SOD2 PE=1 SV=3;Isoform 4 of Superoxide dismutase [Mn], mitochondrial OS=Homo sapiens OX=9606 GN=SOD2;Isoform 2 of Superoxide dismutase [Mn], mitochondrial OS=Homo sapiens OX=9606 GN=SOD2	sp|P04179|SODM_HUMAN;sp|P04179-4|SODM_HUMAN;sp|P04179-2|SODM_HUMAN	0	323.31	sp|P04179|SODM_HUMAN;sp|P04179-4|SODM_HUMAN;sp|P04179-2|SODM_HUMAN	3	25	86	24.75	222	341040000000	4902	28420000000	1	1	12	12	12	12	24	24	48
LCAT	P04180	LCAT_HUMAN	+	serum/plasma	apolipo		+		+																			Phosphatidylcholine-sterol acyltransferase OS=Homo sapiens OX=9606 GN=LCAT PE=1 SV=1	sp|P04180|LCAT_HUMAN	0	49.968	sp|P04180|LCAT_HUMAN	1	9	28.6	49.577	440	884420000	252	58961000	1	1	10	10	3	5	20	8	28
OAT	P04181	OAT_HUMAN	+	cellpart																								Ornithine aminotransferase, mitochondrial OS=Homo sapiens OX=9606 GN=OAT PE=1 SV=1;Isoform 2 of Ornithine aminotransferase, mitochondrial OS=Homo sapiens OX=9606 GN=OAT	sp|P04181|OAT_HUMAN;sp|P04181-2|OAT_HUMAN	0	25.907	sp|P04181|OAT_HUMAN;sp|P04181-2|OAT_HUMAN	2	3	13.2	48.534	439	72222000	10	4513800	1	0	1	0	0	0	1	0	1
HRG	P04196	HRG_HUMAN	+	serum/plasma	coag		+	+	+	+	+																	Histidine-rich glycoprotein OS=Homo sapiens OX=9606 GN=HRG PE=1 SV=1	sp|P04196|HRG_HUMAN	0	323.31	sp|P04196|HRG_HUMAN	1	35	69.9	59.578	525	85782000000	4533	3899200000	1	1	12	12	12	12	24	24	48
A1BG	P04217	A1BG_HUMAN	+	serum/plasma	other		+	+	+	+	+																	Alpha-1B-glycoprotein OS=Homo sapiens OX=9606 GN=A1BG PE=1 SV=4;Isoform 2 of Alpha-1B-glycoprotein OS=Homo sapiens OX=9606 GN=A1BG	sp|P04217|A1BG_HUMAN;sp|P04217-2|A1BG_HUMAN	0	323.31	sp|P04217|A1BG_HUMAN;sp|P04217-2|A1BG_HUMAN	2	28	65.3	54.253	495	132150000000	4702	8810300000	1	1	12	12	12	12	24	24	48
KRT1	P04264	K2C1_HUMAN	+	cellmembrane			+	+	+	+	+																+	Keratin, type II cytoskeletal 1 OS=Homo sapiens OX=9606 GN=KRT1 PE=1 SV=6;	sp|P04264|K2C1_HUMAN;CON__sp|P04264|K2C1_HUMAN	0	323.31	sp|P04264|K2C1_HUMAN;CON__sp|P04264|K2C1_HUMAN	2	63	79.5	66.038	644	114090000000	5974	3680500000	1	1	12	12	11	11	24	22	46
VWF	P04275	VWF_HUMAN	+	cellsurface			+		+		+																	von Willebrand factor OS=Homo sapiens OX=9606 GN=VWF PE=1 SV=4	sp|P04275|VWF_HUMAN	0	323.31	sp|P04275|VWF_HUMAN;sp|P04275-2|VWF_HUMAN	2	234	76.3	309.26	2813	1840100000000	35271	13940000000	1	1	12	12	12	12	24	24	48
SHBG	P04278	SHBG_HUMAN	+	serum/plasma	other		+		+																			Sex hormone-binding globulin OS=Homo sapiens OX=9606 GN=SHBG PE=1 SV=2;Isoform 2 of Sex hormone-binding globulin OS=Homo sapiens OX=9606 GN=SHBG;Isoform 3 of Sex hormone-binding globulin OS=Homo sapiens OX=9606 GN=SHBG;Isoform 5 of Sex hormone-binding glob	sp|P04278|SHBG_HUMAN;sp|P04278-2|SHBG_HUMAN;sp|P04278-3|SHBG_HUMAN;sp|P04278-5|SHBG_HUMAN;sp|P04278-4|SHBG_HUMAN	0	65.943	sp|P04278|SHBG_HUMAN;sp|P04278-2|SHBG_HUMAN;sp|P04278-3|SHBG_HUMAN;sp|P04278-5|SHBG_HUMAN;sp|P04278-4|SHBG_HUMAN	5	15	64.4	43.779	402	2936800000	1043	139850000	1	1	12	12	9	10	24	19	43
TUBB4A	P04350	TBB4A_HUMAN	+	cellpart			+		+																			Tubulin beta-4A chain OS=Homo sapiens OX=9606 GN=TUBB4A PE=1 SV=2	sp|P04350|TBB4A_HUMAN	0.0090416	1.8111	sp|P04350|TBB4A_HUMAN	1	2	74.5	49.585	444	146800000	4	7726300	0	0	0	0	0	0	0	0	0
GAPDH	P04406	G3P_HUMAN	+	cellpart			+		+		+																	Glyceraldehyde-3-phosphate dehydrogenase OS=Homo sapiens OX=9606 GN=GAPDH PE=1 SV=3	sp|P04406|G3P_HUMAN	0	323.31	sp|P04406|G3P_HUMAN;sp|O14556|G3PT_HUMAN	2	56	97.6	36.053	335	1228400000000	11201	72260000000	1	1	12	12	12	12	24	24	48
ASL	P04424-3	ARLY_HUMAN	+	cellpart			+		+		+																	Isoform 3 of Argininosuccinate lyase OS=Homo sapiens OX=9606 GN=ASL;Isoform 2 of Argininosuccinate lyase OS=Homo sapiens OX=9606 GN=ASL;Argininosuccinate lyase OS=Homo sapiens OX=9606 GN=ASL PE=1 SV=4	sp|P04424-3|ARLY_HUMAN;sp|P04424-2|ARLY_HUMAN;sp|P04424|ARLY_HUMAN	0.0014859	3.1161	sp|P04424-3|ARLY_HUMAN;sp|P04424-2|ARLY_HUMAN;sp|P04424|ARLY_HUMAN	3	3	11	48.732	438	1300000000	14	56523000	0	1	0	0	2	3	0	5	5
IGKV1-16	P04430	KV116_HUMAN	+	serum/plasma	IG																							Immunoglobulin kappa variable 1-16 OS=Homo sapiens OX=9606 GN=IGKV1-16 PE=1 SV=2	sp|P04430|KV116_HUMAN	0.00066489	11.713	sp|P04430|KV116_HUMAN	1	3	47.9	12.618	117	970830000	120	242710000	1	1	5	5	7	7	10	14	24
IGKV1D-39	P04432	KVD39_HUMAN	+	serum/plasma	IG																							Immunoglobulin kappa variable 1D-39 OS=Homo sapiens OX=9606 GN=IGKV1D-39 PE=3 SV=2;Immunoglobulin kappa variable 1-39 OS=Homo sapiens OX=9606 GN=IGKV1-39 PE=1 SV=2	sp|P04432|KVD39_HUMAN;sp|P01597|KV139_HUMAN	0	65.747	sp|P04432|KVD39_HUMAN;sp|P01597|KV139_HUMAN	2	3	47.9	12.737	117	13578000000	657	3394400000	1	1	12	12	12	12	24	24	48
IGKV3-11	P04433	KV311_HUMAN	+	serum/plasma	IG		+	+	+	+																		Immunoglobulin kappa variable 3-11 OS=Homo sapiens OX=9606 GN=IGKV3-11 PE=1 SV=1;Immunoglobulin kappa variable 3D-11 OS=Homo sapiens OX=9606 GN=IGKV3D-11 PE=3 SV=6	sp|P04433|KV311_HUMAN;sp|A0A0A0MRZ8|KVD11_HUMAN	0	88.418	sp|P04433|KV311_HUMAN;sp|A0A0A0MRZ8|KVD11_HUMAN	2	4	58.3	12.575	115	16645000000	821	4161300000	1	1	12	12	12	12	24	24	48
CAPNS1	P04632	CPNS1_HUMAN	+	cellpart			+		+		+																	Calpain small subunit 1 OS=Homo sapiens OX=9606 GN=CAPNS1 PE=1 SV=1	sp|P04632|CPNS1_HUMAN	0	323.31	sp|P04632|CPNS1_HUMAN;sp|Q96L46|CPNS2_HUMAN	2	18	83.2	28.315	268	13640000000	1657	1240000000	1	1	10	12	12	12	22	24	46
HSPB1	P04792	HSPB1_HUMAN	+	cellpart		focal adhesion	+		+		+																	Heat shock protein beta-1 OS=Homo sapiens OX=9606 GN=HSPB1 PE=1 SV=2	sp|P04792|HSPB1_HUMAN	0	323.31	sp|P04792|HSPB1_HUMAN	1	19	91.7	22.782	205	68056000000	2879	5671300000	1	1	12	11	12	12	23	24	47
CYBB	P04839	CY24B_HUMAN	+	cellmembrane																								Cytochrome b-245 heavy chain OS=Homo sapiens OX=9606 GN=CYBB PE=1 SV=2	sp|P04839|CY24B_HUMAN	0.001956	2.8677	sp|P04839|CY24B_HUMAN	1	4	8.8	65.335	570	229460000	71	8498500	1	1	6	6	2	3	12	5	17
RPN1	P04843	RPN1_HUMAN	+	cellmembrane							+																	Dolichyl-diphosphooligosaccharide--protein glycosyltransferase subunit 1 OS=Homo sapiens OX=9606 GN=RPN1 PE=1 SV=1	sp|P04843|RPN1_HUMAN	0	281.54	sp|P04843|RPN1_HUMAN	1	45	72.3	68.569	607	61839000000	3478	1717700000	1	1	10	12	12	12	22	24	46
RPN2	P04844	RPN2_HUMAN	+	cellmembrane							+																	Dolichyl-diphosphooligosaccharide--protein glycosyltransferase subunit 2 OS=Homo sapiens OX=9606 GN=RPN2 PE=1 SV=3;Isoform 2 of Dolichyl-diphosphooligosaccharide--protein glycosyltransferase subunit 2 OS=Homo sapiens OX=9606 GN=RPN2	sp|P04844|RPN2_HUMAN;sp|P04844-2|RPN2_HUMAN	0	323.31	sp|P04844|RPN2_HUMAN;sp|P04844-2|RPN2_HUMAN	2	30	66.9	69.283	631	27189000000	1769	1235900000	1	1	10	11	12	12	21	24	45
GNAI2	P04899	GNAI2_HUMAN	+	cellpart			+		+		+																	Guanine nucleotide-binding protein G(i) subunit alpha-2 OS=Homo sapiens OX=9606 GN=GNAI2 PE=1 SV=3;Isoform sGi2 of Guanine nucleotide-binding protein G(i) subunit alpha-2 OS=Homo sapiens OX=9606 GN=GNAI2;Isoform 6 of Guanine nucleotide-binding protein G(i)	sp|P04899|GNAI2_HUMAN;sp|P04899-4|GNAI2_HUMAN;sp|P04899-6|GNAI2_HUMAN;sp|P04899-3|GNAI2_HUMAN;sp|P04899-5|GNAI2_HUMAN;sp|P04899-2|GNAI2_HUMAN	0	323.31	sp|P04899|GNAI2_HUMAN;sp|P04899-4|GNAI2_HUMAN;sp|P04899-6|GNAI2_HUMAN;sp|P04899-3|GNAI2_HUMAN;sp|P04899-5|GNAI2_HUMAN;sp|P04899-2|GNAI2_HUMAN;sp|P09471-2|GNAO_HUMAN;sp|P09471|GNAO_HUMAN	8	42	85.4	40.45	355	162310000000	6142	9547800000	1	1	12	12	12	12	24	24	48
ATP1A1	P05023-4	AT1A1_HUMAN	+	cellmembrane			+		+		+																	Isoform 4 of Sodium/potassium-transporting ATPase subunit alpha-1 OS=Homo sapiens OX=9606 GN=ATP1A1;Sodium/potassium-transporting ATPase subunit alpha-1 OS=Homo sapiens OX=9606 GN=ATP1A1 PE=1 SV=1;Isoform 3 of Sodium/potassium-transporting ATPase subunit a	sp|P05023-4|AT1A1_HUMAN;sp|P05023|AT1A1_HUMAN;sp|P05023-3|AT1A1_HUMAN;sp|P05023-2|AT1A1_HUMAN	0	323.31	sp|P05023-4|AT1A1_HUMAN;sp|P05023|AT1A1_HUMAN;sp|P05023-3|AT1A1_HUMAN;sp|P05023-2|AT1A1_HUMAN;sp|Q13733|AT1A4_HUMAN;sp|P20648|ATP4A_HUMAN;sp|P54707|AT12A_HUMAN;sp|P54707-2|AT12A_HUMAN	8	39	39.1	113	1023	20063000000	2008	445860000	1	1	12	11	12	12	23	24	47
APP	P05067-11	A4_HUMAN	+	cellmembrane		Cell junction	+		+		+																	Isoform 11 of Amyloid-beta precursor protein OS=Homo sapiens OX=9606 GN=APP;Isoform APP751 of Amyloid-beta precursor protein OS=Homo sapiens OX=9606 GN=APP;Amyloid-beta precursor protein OS=Homo sapiens OX=9606 GN=APP PE=1 SV=3;Isoform L-APP733 of Amyloid-	sp|P05067-11|A4_HUMAN;sp|P05067-8|A4_HUMAN;sp|P05067|A4_HUMAN;sp|P05067-7|A4_HUMAN;sp|P05067-9|A4_HUMAN;sp|P05067-4|A4_HUMAN;sp|P05067-6|A4_HUMAN;sp|P05067-3|A4_HUMAN;sp|P05067-5|A4_HUMAN;sp|P05067-10|A4_HUMAN	0	239.74	sp|P05067-11|A4_HUMAN;sp|P05067-8|A4_HUMAN;sp|P05067|A4_HUMAN;sp|P05067-7|A4_HUMAN;sp|P05067-9|A4_HUMAN;sp|P05067-4|A4_HUMAN;sp|P05067-6|A4_HUMAN;sp|P05067-3|A4_HUMAN;sp|P05067-5|A4_HUMAN;sp|P05067-10|A4_HUMAN;sp|P05067-2|A4_HUMAN	11	31	47.7	84.52	746	27068000000	1984	873170000	1	1	9	9	11	11	18	22	40
APOD	P05090	APOD_HUMAN	+	serum/plasma	apolipo		+		+		+																	Apolipoprotein D OS=Homo sapiens OX=9606 GN=APOD PE=1 SV=1	sp|P05090|APOD_HUMAN	0	323.31	sp|P05090|APOD_HUMAN	1	16	70.9	21.275	189	114830000000	3209	12759000000	1	1	12	12	12	12	24	24	48
S100A8	P05109	S10A8_HUMAN	+	cellsurface			+		+		+																	Protein S100-A8 OS=Homo sapiens OX=9606 GN=S100A8 PE=1 SV=1	sp|P05109|S10A8_HUMAN	0	30.439	sp|P05109|S10A8_HUMAN	1	12	81.7	10.834	93	12418000000	523	1552200000	1	1	12	12	10	10	24	20	44
SERPINE1	P05121	PAI1_HUMAN	+	serum/plasma	coag		+		+		+																	Plasminogen activator inhibitor 1 OS=Homo sapiens OX=9606 GN=SERPINE1 PE=1 SV=1;Isoform 2 of Plasminogen activator inhibitor 1 OS=Homo sapiens OX=9606 GN=SERPINE1	sp|P05121|PAI1_HUMAN;sp|P05121-2|PAI1_HUMAN	0	29.15	sp|P05121|PAI1_HUMAN;sp|P05121-2|PAI1_HUMAN	2	14	46	45.059	402	2431200000	234	127960000	1	1	3	2	10	10	5	20	25
SLC25A5	P05141	ADT2_HUMAN	+	cellmembrane							+																	ADP/ATP translocase 2 OS=Homo sapiens OX=9606 GN=SLC25A5 PE=1 SV=7	sp|P05141|ADT2_HUMAN	0	323.31	sp|P05141|ADT2_HUMAN;sp|Q9H0C2|ADT4_HUMAN	2	26	66.1	32.852	298	56071000000	2241	2951100000	1	1	12	12	12	12	24	24	48
SERPINA5	P05154	IPSP_HUMAN	+	cellsurface			+		+		+																	Plasma serine protease inhibitor OS=Homo sapiens OX=9606 GN=SERPINA5 PE=1 SV=3	sp|P05154|IPSP_HUMAN	0	20.877	sp|P05154|IPSP_HUMAN	1	12	36	45.674	406	361420000	110	18071000	1	1	6	7	1	2	13	3	16
SERPING1	P05155-2	IC1_HUMAN	+	cellsurface			+	+	+	+	+																	Isoform 2 of Plasma protease C1 inhibitor OS=Homo sapiens OX=9606 GN=SERPING1;Plasma protease C1 inhibitor OS=Homo sapiens OX=9606 GN=SERPING1 PE=1 SV=2;Isoform 3 of Plasma protease C1 inhibitor OS=Homo sapiens OX=9606 GN=SERPING1	sp|P05155-2|IC1_HUMAN;sp|P05155|IC1_HUMAN;sp|P05155-3|IC1_HUMAN	0	317.67	sp|P05155-2|IC1_HUMAN;sp|P05155|IC1_HUMAN;sp|P05155-3|IC1_HUMAN	3	25	49.1	49.757	448	38429000000	1754	1921400000	1	1	12	12	12	12	24	24	48
CFI	P05156	CFAI_HUMAN	+	serum/plasma	compl		+		+																			Complement factor I OS=Homo sapiens OX=9606 GN=CFI PE=1 SV=2	sp|P05156|CFAI_HUMAN	0	323.31	sp|P05156|CFAI_HUMAN	1	31	55.4	65.75	583	28497000000	1804	1055400000	1	1	12	12	12	12	24	24	48
F13B	P05160	F13B_HUMAN	+	serum/plasma	coag						+																	Coagulation factor XIII B chain OS=Homo sapiens OX=9606 GN=F13B PE=1 SV=3	sp|P05160|F13B_HUMAN	0	323.31	sp|P05160|F13B_HUMAN	1	78	83.8	75.51	661	722550000000	5240	22580000000	1	1	12	12	12	12	24	24	48
MPO	P05164-2	PERM_HUMAN	+	cellpart			+		+																			Isoform H14 of Myeloperoxidase OS=Homo sapiens OX=9606 GN=MPO;Myeloperoxidase OS=Homo sapiens OX=9606 GN=MPO PE=1 SV=1;Isoform H7 of Myeloperoxidase OS=Homo sapiens OX=9606 GN=MPO	sp|P05164-2|PERM_HUMAN;sp|P05164|PERM_HUMAN;sp|P05164-3|PERM_HUMAN	0	175.06	sp|P05164-2|PERM_HUMAN;sp|P05164|PERM_HUMAN;sp|P05164-3|PERM_HUMAN	3	38	59.4	73.853	650	8290300000	583	197390000	1	1	5	5	5	5	10	10	20
PCCA	P05165-3	PCCA_HUMAN	+	cellpart							+																	Isoform 3 of Propionyl-CoA carboxylase alpha chain, mitochondrial OS=Homo sapiens OX=9606 GN=PCCA;Isoform 2 of Propionyl-CoA carboxylase alpha chain, mitochondrial OS=Homo sapiens OX=9606 GN=PCCA;Propionyl-CoA carboxylase alpha chain, mitochondrial OS=Homo	sp|P05165-3|PCCA_HUMAN;sp|P05165-2|PCCA_HUMAN;sp|P05165|PCCA_HUMAN	0.0090457	1.8112	sp|P05165-3|PCCA_HUMAN;sp|P05165-2|PCCA_HUMAN;sp|P05165|PCCA_HUMAN	3	9	18.8	75.001	681	146000000	17	3476200	0	1	0	0	4	4	0	8	8
PCCB	P05166	PCCB_HUMAN	+	cellpart							+																	Propionyl-CoA carboxylase beta chain, mitochondrial OS=Homo sapiens OX=9606 GN=PCCB PE=1 SV=3;Isoform 2 of Propionyl-CoA carboxylase beta chain, mitochondrial OS=Homo sapiens OX=9606 GN=PCCB	sp|P05166|PCCB_HUMAN;sp|P05166-2|PCCB_HUMAN	0	15.145	sp|P05166|PCCB_HUMAN;sp|P05166-2|PCCB_HUMAN	2	6	18.9	58.215	539	896990000	53	29900000	0	1	0	0	7	8	0	15	15
EIF2S1	P05198	IF2A_HUMAN	+	cellpart			+		+		+																	Eukaryotic translation initiation factor 2 subunit 1 OS=Homo sapiens OX=9606 GN=EIF2S1 PE=1 SV=3	sp|P05198|IF2A_HUMAN	0	16.553	sp|P05198|IF2A_HUMAN	1	7	39.4	36.112	315	1433100000	207	65143000	1	1	3	4	11	11	7	22	29
RPLP1	P05386	RLA1_HUMAN	+	cellpart		focal adhesion					+																	60S acidic ribosomal protein P1 OS=Homo sapiens OX=9606 GN=RPLP1 PE=1 SV=1	sp|P05386|RLA1_HUMAN	0	36.516	sp|P05386|RLA1_HUMAN	1	5	84.2	11.514	114	2740800000	252	913590000	1	1	9	9	12	12	18	24	42
RPLP2	P05387	RLA2_HUMAN	+	cellpart		focal adhesion	+		+		+																	60S acidic ribosomal protein P2 OS=Homo sapiens OX=9606 GN=RPLP2 PE=1 SV=1	sp|P05387|RLA2_HUMAN	0	61.061	sp|P05387|RLA2_HUMAN	1	7	80.9	11.665	115	1888300000	227	377660000	1	1	5	5	12	12	10	24	34
RPLP0	P05388	RLA0_HUMAN	+	cellpart		focal adhesion	+		+		+																	60S acidic ribosomal protein P0 OS=Homo sapiens OX=9606 GN=RPLP0 PE=1 SV=1;Isoform 2 of 60S acidic ribosomal protein P0 OS=Homo sapiens OX=9606 GN=RPLP0;60S acidic ribosomal protein P0-like OS=Homo sapiens OX=9606 GN=RPLP0P6 PE=5 SV=1	sp|P05388|RLA0_HUMAN;sp|P05388-2|RLA0_HUMAN;sp|Q8NHW5|RLA0L_HUMAN	0.0051789	2.2926	sp|P05388|RLA0_HUMAN;sp|P05388-2|RLA0_HUMAN;sp|Q8NHW5|RLA0L_HUMAN	3	4	18.9	34.273	317	73149000	27	5626900	1	1	1	0	3	3	1	6	7
CLEC3B	P05452	TETN_HUMAN	+	cellsurface			+		+		+																	Tetranectin OS=Homo sapiens OX=9606 GN=CLEC3B PE=1 SV=3	sp|P05452|TETN_HUMAN	0	80.717	sp|P05452|TETN_HUMAN	1	13	69.3	22.537	202	1561800000	286	156180000	1	1	9	9	7	7	18	14	32
SERPINA7	P05543	THBG_HUMAN	+	cellsurface			+		+																			Thyroxine-binding globulin OS=Homo sapiens OX=9606 GN=SERPINA7 PE=1 SV=2	sp|P05543|THBG_HUMAN	0	52.422	sp|P05543|THBG_HUMAN	1	9	37.8	46.324	415	724100000	160	32914000	1	1	8	9	7	6	17	13	30
SERPIND1	P05546	HEP2_HUMAN	+	cellpart			+		+		+																	Heparin cofactor 2 OS=Homo sapiens OX=9606 GN=SERPIND1 PE=1 SV=3	sp|P05546|HEP2_HUMAN	0	323.31	sp|P05546|HEP2_HUMAN	1	29	67.5	57.07	499	32532000000	2668	1251200000	1	1	12	12	11	11	24	22	46
PRKCB	P05771-2	KPCB_HUMAN	+	cellpart			+		+		+																	Isoform Beta-II of Protein kinase C beta type OS=Homo sapiens OX=9606 GN=PRKCB	sp|P05771-2|KPCB_HUMAN	0	323.31	sp|P05771-2|KPCB_HUMAN	1	53	73.4	77.011	673	53163000000	4063	1563600000	1	1	10	12	12	12	22	24	46
MYL1	P05976-2	MYL1_HUMAN	+	cellpart							+																+	Isoform MLC3 of Myosin light chain 1/3, skeletal muscle isoform OS=Homo sapiens OX=9606 GN=MYL1;;Myosin light chain 1/3, skeletal muscle isoform OS=Homo sapiens OX=9606 GN=MYL1 PE=2 SV=3;Myosin light chain 3 OS=Homo sapiens OX=9606 GN=MYL3 PE=1 SV=3	sp|P05976-2|MYL1_HUMAN;CON__sp|P02602|MYL1_RABIT;sp|P05976|MYL1_HUMAN;sp|P08590|MYL3_HUMAN	0	126.56	sp|P05976-2|MYL1_HUMAN;CON__sp|P02602|MYL1_RABIT;sp|P05976|MYL1_HUMAN;sp|P08590|MYL3_HUMAN	4	2	16.7	16.684	150	212700000000	854	21270000000	1	1	12	12	12	12	24	24	48
UROD	P06132	DCUP_HUMAN	+	cellpart							+																	Uroporphyrinogen decarboxylase OS=Homo sapiens OX=9606 GN=UROD PE=1 SV=2	sp|P06132|DCUP_HUMAN	0	120.52	sp|P06132|DCUP_HUMAN	1	12	67	40.786	367	3430900000	512	214430000	1	1	5	5	12	11	10	23	33
FYN	P06241-2	FYN_HUMAN	+	cellpart							+																	Isoform 2 of Tyrosine-protein kinase Fyn OS=Homo sapiens OX=9606 GN=FYN	sp|P06241-2|FYN_HUMAN	0	41.964	sp|P06241-2|FYN_HUMAN	1	20	54.9	60.14	534	4960200000	424	198410000	1	1	5	4	12	12	9	24	33
IGKV2-30	P06310	KV230_HUMAN	+	serum/plasma	IG		+	+	+	+																		Immunoglobulin kappa variable 2-30 OS=Homo sapiens OX=9606 GN=IGKV2-30 PE=3 SV=2	sp|P06310|KV230_HUMAN	0	33.877	sp|P06310|KV230_HUMAN	1	3	41.7	13.185	120	11539000000	418	2884900000	1	1	12	12	12	12	24	24	48
IGKV4-1	P06312	KV401_HUMAN	+	serum/plasma	IG			+		+																		Immunoglobulin kappa variable 4-1 OS=Homo sapiens OX=9606 GN=IGKV4-1 PE=1 SV=1	sp|P06312|KV401_HUMAN	0	154.63	sp|P06312|KV401_HUMAN	1	6	29.8	13.38	121	35305000000	878	8826100000	1	1	12	12	12	12	24	24	48
IGHV4-34	P06331	HV434_HUMAN	+	serum/plasma	IG																							Immunoglobulin heavy variable 4-34 OS=Homo sapiens OX=9606 GN=IGHV4-34 PE=1 SV=2	sp|P06331|HV434_HUMAN	0	323.31	sp|P06331|HV434_HUMAN	1	7	48	13.815	123	17737000000	614	4434300000	1	1	12	12	12	12	24	24	48
GSN	P06396	GELS_HUMAN	+	cellpart		focal adhesion	+	+	+	+	+																	Gelsolin OS=Homo sapiens OX=9606 GN=GSN PE=1 SV=1;Isoform 3 of Gelsolin OS=Homo sapiens OX=9606 GN=GSN	sp|P06396|GELS_HUMAN;sp|P06396-3|GELS_HUMAN	0	323.31	sp|P06396|GELS_HUMAN;sp|P06396-3|GELS_HUMAN	2	85	87.7	85.696	782	1890000000000	20350	59063000000	1	1	12	12	12	12	24	24	48
ATP5F1B	P06576	ATPB_HUMAN	+	cellmembrane			+		+		+																	ATP synthase subunit beta, mitochondrial OS=Homo sapiens OX=9606 GN=ATP5F1B PE=1 SV=3	sp|P06576|ATPB_HUMAN	0	323.31	sp|P06576|ATPB_HUMAN	1	47	85.6	56.559	529	385180000000	9081	13282000000	1	1	12	12	12	12	24	24	48
C2	P06681	CO2_HUMAN	+	serum/plasma	compl		+		+																			Complement C2 OS=Homo sapiens OX=9606 GN=C2 PE=1 SV=2;Isoform 3 of Complement C2 OS=Homo sapiens OX=9606 GN=C2;Isoform 2 of Complement C2 OS=Homo sapiens OX=9606 GN=C2	sp|P06681|CO2_HUMAN;sp|P06681-3|CO2_HUMAN;sp|P06681-2|CO2_HUMAN	0	42.72	sp|P06681|CO2_HUMAN;sp|P06681-3|CO2_HUMAN;sp|P06681-2|CO2_HUMAN	3	19	39.6	83.267	752	3665300000	609	93983000	1	1	12	12	12	12	24	24	48
S100A9	P06702	S10A9_HUMAN	+	cellsurface		Cell junction	+		+		+																	Protein S100-A9 OS=Homo sapiens OX=9606 GN=S100A9 PE=1 SV=1	sp|P06702|S10A9_HUMAN	0	299.46	sp|P06702|S10A9_HUMAN	1	11	85.1	13.242	114	24430000000	971	3490000000	1	1	12	12	12	12	24	24	48
S100A6	P06703	S10A6_HUMAN	+	cellsurface			+		+		+																	Protein S100-A6 OS=Homo sapiens OX=9606 GN=S100A6 PE=1 SV=1	sp|P06703|S10A6_HUMAN	0	23.37	sp|P06703|S10A6_HUMAN	1	4	66.7	10.18	90	2422400000	103	484480000	1	1	4	5	9	11	9	20	29
APOA4	P06727	APOA4_HUMAN	+	serum/plasma	apolipo		+	+	+	+	+																	Apolipoprotein A-IV OS=Homo sapiens OX=9606 GN=APOA4 PE=1 SV=3	sp|P06727|APOA4_HUMAN	0	323.31	sp|P06727|APOA4_HUMAN	1	81	92.2	45.398	396	1473200000000	17723	58928000000	1	1	12	12	12	12	24	24	48
EIF4E	P06730	IF4E_HUMAN	+	cellpart			+		+		+																	Eukaryotic translation initiation factor 4E OS=Homo sapiens OX=9606 GN=EIF4E PE=1 SV=2;Isoform 2 of Eukaryotic translation initiation factor 4E OS=Homo sapiens OX=9606 GN=EIF4E;Isoform 3 of Eukaryotic translation initiation factor 4E OS=Homo sapiens OX=960	sp|P06730|IF4E_HUMAN;sp|P06730-2|IF4E_HUMAN;sp|P06730-3|IF4E_HUMAN	0.0016493	5.3375	sp|P06730|IF4E_HUMAN;sp|P06730-2|IF4E_HUMAN;sp|P06730-3|IF4E_HUMAN	3	4	33.6	25.097	217	309580000	53	28144000	0	1	0	0	4	6	0	10	10
ENO1	P06733	ENOA_HUMAN	+	cellpart			+		+		+																	Alpha-enolase OS=Homo sapiens OX=9606 GN=ENO1 PE=1 SV=2;Isoform MBP-1 of Alpha-enolase OS=Homo sapiens OX=9606 GN=ENO1	sp|P06733|ENOA_HUMAN;sp|P06733-2|ENOA_HUMAN	0	323.31	sp|P06733|ENOA_HUMAN;sp|P06733-2|ENOA_HUMAN	2	63	97.2	47.168	434	480340000000	10001	21833000000	1	1	12	12	12	12	24	24	48
PYGL	P06737-2	PYGL_HUMAN	+	cellpart			+		+		+																	Isoform 2 of Glycogen phosphorylase, liver form OS=Homo sapiens OX=9606 GN=PYGL;Glycogen phosphorylase, liver form OS=Homo sapiens OX=9606 GN=PYGL PE=1 SV=4	sp|P06737-2|PYGL_HUMAN;sp|P06737|PYGL_HUMAN	0	86.637	sp|P06737-2|PYGL_HUMAN;sp|P06737|PYGL_HUMAN	2	34	59.9	93.133	813	4492200000	482	88083000	1	1	6	5	11	11	11	22	33
GPI	P06744	G6PI_HUMAN	+	cellpart			+		+		+																	Glucose-6-phosphate isomerase OS=Homo sapiens OX=9606 GN=GPI PE=1 SV=4;Isoform 2 of Glucose-6-phosphate isomerase OS=Homo sapiens OX=9606 GN=GPI	sp|P06744|G6PI_HUMAN;sp|P06744-2|G6PI_HUMAN	0	323.31	sp|P06744|G6PI_HUMAN;sp|P06744-2|G6PI_HUMAN	2	32	71.3	63.146	558	46009000000	2676	1917000000	1	1	11	11	12	12	22	24	46
TPM3	P06753-2	TPM3_HUMAN	+	cellpart			+		+		+																	Isoform 2 of Tropomyosin alpha-3 chain OS=Homo sapiens OX=9606 GN=TPM3;Isoform 3 of Tropomyosin alpha-3 chain OS=Homo sapiens OX=9606 GN=TPM3	sp|P06753-2|TPM3_HUMAN;sp|P06753-3|TPM3_HUMAN	0	323.31	sp|P06753-2|TPM3_HUMAN;sp|P06753-3|TPM3_HUMAN	2	65	95.2	29.032	248	1849500000000	11398	115590000000	1	1	12	12	12	12	24	24	48
LPL	P06858	LIPL_HUMAN	+	cellmembrane																								Lipoprotein lipase OS=Homo sapiens OX=9606 GN=LPL PE=1 SV=1	sp|P06858|LIPL_HUMAN	0.0017084	6.1848	sp|P06858|LIPL_HUMAN	1	6	22.5	53.162	475	209450000	94	11024000	1	1	8	7	3	3	15	6	21
SERPINE2	P07093-2	GDN_HUMAN	+	cellsurface							+																	Isoform 2 of Glia-derived nexin OS=Homo sapiens OX=9606 GN=SERPINE2;Glia-derived nexin OS=Homo sapiens OX=9606 GN=SERPINE2 PE=1 SV=1;Isoform 3 of Glia-derived nexin OS=Homo sapiens OX=9606 GN=SERPINE2	sp|P07093-2|GDN_HUMAN;sp|P07093|GDN_HUMAN;sp|P07093-3|GDN_HUMAN	0.0017544	6.8307	sp|P07093-2|GDN_HUMAN;sp|P07093|GDN_HUMAN;sp|P07093-3|GDN_HUMAN	3	9	30	44	397	318250000	44	15155000	0	1	0	0	8	6	0	14	14
DBI	P07108-5	ACBP_HUMAN	+	cellpart			+		+		+																	Isoform 5 of Acyl-CoA-binding protein OS=Homo sapiens OX=9606 GN=DBI;Acyl-CoA-binding protein OS=Homo sapiens OX=9606 GN=DBI PE=1 SV=2;Isoform 3 of Acyl-CoA-binding protein OS=Homo sapiens OX=9606 GN=DBI;Isoform 2 of Acyl-CoA-binding protein OS=Homo sapien	sp|P07108-5|ACBP_HUMAN;sp|P07108|ACBP_HUMAN;sp|P07108-3|ACBP_HUMAN;sp|P07108-2|ACBP_HUMAN;sp|P07108-4|ACBP_HUMAN	0.0015144	3.4811	sp|P07108-5|ACBP_HUMAN;sp|P07108|ACBP_HUMAN;sp|P07108-3|ACBP_HUMAN;sp|P07108-2|ACBP_HUMAN;sp|P07108-4|ACBP_HUMAN;sp|P07108-6|ACBP_HUMAN	6	3	39.2	16.495	148	45000000	5	5625000	0	1	0	0	0	1	0	1	1
LDHB	P07195	LDHB_HUMAN	+	cellpart			+		+		+																	L-lactate dehydrogenase B chain OS=Homo sapiens OX=9606 GN=LDHB PE=1 SV=2	sp|P07195|LDHB_HUMAN	0	323.31	sp|P07195|LDHB_HUMAN;sp|P07864|LDHC_HUMAN	2	35	94.9	36.638	334	174820000000	4513	10283000000	1	1	12	12	12	12	24	24	48
GPX1	P07203	GPX1_HUMAN	+	cellpart							+																	Glutathione peroxidase 1 OS=Homo sapiens OX=9606 GN=GPX1 PE=1 SV=4	sp|P07203|GPX1_HUMAN	0	164.19	sp|P07203|GPX1_HUMAN;sp|P07203-2|GPX1_HUMAN	2	16	84.7	22.088	203	70870000000	2306	6442800000	1	1	10	12	12	12	22	24	46
PROS1	P07225	PROS_HUMAN	+	serum/plasma	coag		+	+	+	+	+																	Vitamin K-dependent protein S OS=Homo sapiens OX=9606 GN=PROS1 PE=1 SV=1	sp|P07225|PROS_HUMAN	0	323.31	sp|P07225|PROS_HUMAN	1	41	62.3	75.122	676	145130000000	7256	4837800000	1	1	12	12	12	12	24	24	48
P4HB	P07237	PDIA1_HUMAN	+	cellmembrane		focal adhesion	+		+		+																	Protein disulfide-isomerase OS=Homo sapiens OX=9606 GN=P4HB PE=1 SV=3	sp|P07237|PDIA1_HUMAN	0	323.31	sp|P07237|PDIA1_HUMAN	1	58	80.9	57.116	508	196880000000	6347	5625100000	1	1	12	12	12	12	24	24	48
CTSD	P07339	CATD_HUMAN	+	cellsurface			+		+		+																	Cathepsin D OS=Homo sapiens OX=9606 GN=CTSD PE=1 SV=1	sp|P07339|CATD_HUMAN	0	138.83	sp|P07339|CATD_HUMAN	1	15	41.5	44.552	412	16641000000	852	875820000	1	1	8	9	12	12	17	24	41
ANXA2	P07355	ANXA2_HUMAN	+	cellsurface			+		+																			Annexin A2 OS=Homo sapiens OX=9606 GN=ANXA2 PE=1 SV=2;Isoform 2 of Annexin A2 OS=Homo sapiens OX=9606 GN=ANXA2;Putative annexin A2-like protein OS=Homo sapiens OX=9606 GN=ANXA2P2 PE=5 SV=2	sp|P07355|ANXA2_HUMAN;sp|P07355-2|ANXA2_HUMAN;sp|A6NMY6|AXA2L_HUMAN	0	56.893	sp|P07355|ANXA2_HUMAN;sp|P07355-2|ANXA2_HUMAN;sp|A6NMY6|AXA2L_HUMAN	3	22	66.4	38.604	339	4468700000	784	203120000	1	1	12	11	9	11	23	20	43
C8A	P07357	CO8A_HUMAN	+	serum/plasma	compl		+	+	+	+	+																	Complement component C8 alpha chain OS=Homo sapiens OX=9606 GN=C8A PE=1 SV=2	sp|P07357|CO8A_HUMAN	0	323.31	sp|P07357|CO8A_HUMAN	1	28	58.6	65.163	584	34402000000	3077	1323100000	1	1	12	12	12	12	24	24	48
C8B	P07358	CO8B_HUMAN	+	serum/plasma	compl		+		+																			Complement component C8 beta chain OS=Homo sapiens OX=9606 GN=C8B PE=1 SV=3	sp|P07358|CO8B_HUMAN	0	323.31	sp|P07358|CO8B_HUMAN	1	36	63.6	67.046	591	39393000000	4034	1406900000	1	1	12	12	12	12	24	24	48
C8G	P07360	CO8G_HUMAN	+	serum/plasma	compl		+	+	+	+	+																	Complement component C8 gamma chain OS=Homo sapiens OX=9606 GN=C8G PE=1 SV=3	sp|P07360|CO8G_HUMAN	0	69.216	sp|P07360|CO8G_HUMAN	1	11	65.8	22.277	202	12462000000	1384	1038500000	1	1	12	12	12	12	24	24	48
CAPN1	P07384	CAN1_HUMAN	+	cellpart		focal adhesion	+		+		+																	Calpain-1 catalytic subunit OS=Homo sapiens OX=9606 GN=CAPN1 PE=1 SV=1	sp|P07384|CAN1_HUMAN	0	323.31	sp|P07384|CAN1_HUMAN	1	54	73	81.889	714	62638000000	3952	1739900000	1	1	11	12	12	12	23	24	47
TUBB	P07437	TBB5_HUMAN	+	cellpart			+		+		+																	Tubulin beta chain OS=Homo sapiens OX=9606 GN=TUBB PE=1 SV=2	sp|P07437|TBB5_HUMAN	0	323.31	sp|P07437|TBB5_HUMAN	1	40	81.3	49.67	444	538490000000	8285	28341000000	1	1	12	12	12	12	24	24	48
IVL	P07476	INVO_HUMAN	+	cellpart			+		+																		+	Involucrin OS=Homo sapiens OX=9606 GN=IVL PE=1 SV=2;	sp|P07476|INVO_HUMAN;CON__sp|P07476|INVO_HUMAN	0.0056153	2.1918	sp|P07476|INVO_HUMAN;CON__sp|P07476|INVO_HUMAN	2	4	10.6	68.478	585	1133400000	8	34344000	1	0	3	4	0	0	7	0	7
PSAP	P07602	SAP_HUMAN	+	cellpart			+		+		+																	Prosaposin OS=Homo sapiens OX=9606 GN=PSAP PE=1 SV=2;Isoform Sap-mu-6 of Prosaposin OS=Homo sapiens OX=9606 GN=PSAP	sp|P07602|SAP_HUMAN;sp|P07602-2|SAP_HUMAN	0	86.091	sp|P07602|SAP_HUMAN;sp|P07602-2|SAP_HUMAN	2	20	48.3	58.112	524	9572300000	665	330080000	1	1	9	10	12	12	19	24	43
HEXB	P07686	HEXB_HUMAN	+	cellpart			+		+		+																	Beta-hexosaminidase subunit beta OS=Homo sapiens OX=9606 GN=HEXB PE=1 SV=3	sp|P07686|HEXB_HUMAN	0.0017523	6.8144	sp|P07686|HEXB_HUMAN	1	8	23.7	63.111	556	774670000	47	28692000	0	1	0	0	7	7	0	14	14
PFN1	P07737	PROF1_HUMAN	+	cellpart		focal adhesion	+	+	+	+	+																	Profilin-1 OS=Homo sapiens OX=9606 GN=PFN1 PE=1 SV=2	sp|P07737|PROF1_HUMAN	0	323.31	sp|P07737|PROF1_HUMAN	1	31	97.1	15.054	140	949990000000	8627	105550000000	1	1	12	12	12	12	24	24	48
APRT	P07741	APT_HUMAN	+	cellpart			+		+		+																	Adenine phosphoribosyltransferase OS=Homo sapiens OX=9606 GN=APRT PE=1 SV=2;Isoform 2 of Adenine phosphoribosyltransferase OS=Homo sapiens OX=9606 GN=APRT	sp|P07741|APT_HUMAN;sp|P07741-2|APT_HUMAN	0	60.23	sp|P07741|APT_HUMAN;sp|P07741-2|APT_HUMAN	2	12	87.2	19.608	180	4126700000	532	343890000	1	1	5	7	12	12	12	24	36
EPRS	P07814	SYEP_HUMAN	+	cellpart							+																	Bifunctional glutamate/proline--tRNA ligase OS=Homo sapiens OX=9606 GN=EPRS PE=1 SV=5	sp|P07814|SYEP_HUMAN	0	16.2	sp|P07814|SYEP_HUMAN	1	10	11.5	170.59	1512	165790000	38	2210500	0	1	0	0	6	5	0	11	11
HSP90AA1	P07900-2	HS90A_HUMAN	+	cellmembrane			+		+		+																	Isoform 2 of Heat shock protein HSP 90-alpha OS=Homo sapiens OX=9606 GN=HSP90AA1	sp|P07900-2|HS90A_HUMAN	0	323.31	sp|P07900-2|HS90A_HUMAN	1	63	59.8	98.16	854	120920000000	5956	2879000000	1	1	12	12	12	12	24	24	48
UQCRH	P07919	QCR6_HUMAN	+	cellpart							+																	Cytochrome b-c1 complex subunit 6, mitochondrial OS=Homo sapiens OX=9606 GN=UQCRH PE=1 SV=2;Cytochrome b-c1 complex subunit 6-like, mitochondrial OS=Homo sapiens OX=9606 GN=UQCRHL PE=3 SV=1	sp|P07919|QCR6_HUMAN;sp|A0A096LP55|QCR6L_HUMAN	0	102.69	sp|P07919|QCR6_HUMAN;sp|A0A096LP55|QCR6L_HUMAN	2	4	52.7	10.739	91	9954600000	353	1659100000	1	1	11	11	12	12	22	24	46
LAMB1	P07942	LAMB1_HUMAN	+	cellsurface			+		+		+																	Laminin subunit beta-1 OS=Homo sapiens OX=9606 GN=LAMB1 PE=1 SV=2	sp|P07942|LAMB1_HUMAN	0.0017391	6.6418	sp|P07942|LAMB1_HUMAN	1	9	9.5	198.04	1786	228740000	26	3315100	0	1	0	0	4	7	0	11	11
YES1	P07947	YES_HUMAN	+	cellmembrane		focal adhesion	+		+		+																	Tyrosine-protein kinase Yes OS=Homo sapiens OX=9606 GN=YES1 PE=1 SV=3	sp|P07947|YES_HUMAN	0	46.199	sp|P07947|YES_HUMAN	1	11	56.2	60.801	543	1004800000	162	43686000	1	1	1	0	9	9	1	18	19
LYN	P07948	LYN_HUMAN	+	cellmembrane			+		+		+																	Tyrosine-protein kinase Lyn OS=Homo sapiens OX=9606 GN=LYN PE=1 SV=3	sp|P07948|LYN_HUMAN	0	323.31	sp|P07948|LYN_HUMAN	1	41	72.5	58.573	512	59174000000	3777	2113400000	1	1	12	12	12	12	24	24	48
TPM2	P07951-2	TPM2_HUMAN	+	cellpart							+																	Isoform 2 of Tropomyosin beta chain OS=Homo sapiens OX=9606 GN=TPM2	sp|P07951-2|TPM2_HUMAN	0	323.31	sp|P07951-2|TPM2_HUMAN	1	34	82.7	32.989	284	237650000000	3263	14853000000	1	1	11	12	12	12	23	24	47
FH	P07954-2	FUMH_HUMAN	+	cellpart			+		+		+																	Isoform Cytoplasmic of Fumarate hydratase, mitochondrial OS=Homo sapiens OX=9606 GN=FH;Fumarate hydratase, mitochondrial OS=Homo sapiens OX=9606 GN=FH PE=1 SV=3	sp|P07954-2|FUMH_HUMAN;sp|P07954|FUMH_HUMAN	0	306.09	sp|P07954-2|FUMH_HUMAN;sp|P07954|FUMH_HUMAN	2	22	73.7	50.212	467	21127000000	1990	880300000	1	1	11	11	12	12	22	24	46
SFTPB	P07988	PSPB_HUMAN	+	cellsurface																								Pulmonary surfactant-associated protein B OS=Homo sapiens OX=9606 GN=SFTPB PE=1 SV=3	sp|P07988|PSPB_HUMAN	0	15.841	sp|P07988|PSPB_HUMAN	1	6	24.7	42.117	381	134040000	34	10311000	1	0	3	3	0	0	6	0	6
THBS1	P07996	TSP1_HUMAN	+	serum/plasma	coag		+		+		+																	Thrombospondin-1 OS=Homo sapiens OX=9606 GN=THBS1 PE=1 SV=2;Isoform 2 of Thrombospondin-1 OS=Homo sapiens OX=9606 GN=THBS1	sp|P07996|TSP1_HUMAN;sp|P07996-2|TSP1_HUMAN	0	323.31	sp|P07996|TSP1_HUMAN;sp|P07996-2|TSP1_HUMAN;sp|P49746-2|TSP3_HUMAN;sp|P49746|TSP3_HUMAN	4	144	83.2	129.38	1170	6046400000000	44789	99121000000	1	1	12	12	12	12	24	24	48
ANXA6	P08133	ANXA6_HUMAN	+	cellsurface		focal adhesion	+		+		+																	Annexin A6 OS=Homo sapiens OX=9606 GN=ANXA6 PE=1 SV=3;Isoform 2 of Annexin A6 OS=Homo sapiens OX=9606 GN=ANXA6	sp|P08133|ANXA6_HUMAN;sp|P08133-2|ANXA6_HUMAN	0	51.279	sp|P08133|ANXA6_HUMAN;sp|P08133-2|ANXA6_HUMAN	2	14	34.2	75.872	673	1969500000	178	45802000	1	1	6	6	5	5	12	10	22
RHOC	P08134	RHOC_HUMAN	+	cellmembrane			+		+		+																	Rho-related GTP-binding protein RhoC OS=Homo sapiens OX=9606 GN=RHOC PE=1 SV=1	sp|P08134|RHOC_HUMAN	0	34.934	sp|P08134|RHOC_HUMAN	1	5	80.3	22.006	193	3332900000	275	416610000	1	1	8	9	10	10	17	20	37
SERPINA6	P08185	CBG_HUMAN	+	serum/plasma	other		+		+																			Corticosteroid-binding globulin OS=Homo sapiens OX=9606 GN=SERPINA6 PE=1 SV=1	sp|P08185|CBG_HUMAN	0	68.993	sp|P08185|CBG_HUMAN	1	16	56.8	45.14	405	5488000000	520	322820000	1	1	12	12	12	12	24	24	48
HSP90AB1	P08238	HS90B_HUMAN	+	cellpart			+		+		+																	Heat shock protein HSP 90-beta OS=Homo sapiens OX=9606 GN=HSP90AB1 PE=1 SV=4	sp|P08238|HS90B_HUMAN	0	323.31	sp|P08238|HS90B_HUMAN	1	27	60.5	83.263	724	30104000000	1988	860110000	1	1	11	12	12	12	23	24	47
SRPRA	P08240-2	SRPRA_HUMAN	+	cellmembrane			+		+																			Isoform 2 of Signal recognition particle receptor subunit alpha OS=Homo sapiens OX=9606 GN=SRPRA;Signal recognition particle receptor subunit alpha OS=Homo sapiens OX=9606 GN=SRPRA PE=1 SV=2	sp|P08240-2|SRPRA_HUMAN;sp|P08240|SRPRA_HUMAN	0	16.305	sp|P08240-2|SRPRA_HUMAN;sp|P08240|SRPRA_HUMAN	2	8	18.5	66.558	610	368140000	35	11875000	0	1	0	0	6	8	0	14	14
ELANE	P08246	ELNE_HUMAN	+	cellsurface			+		+																			Neutrophil elastase OS=Homo sapiens OX=9606 GN=ELANE PE=1 SV=1	sp|P08246|ELNE_HUMAN	0	96.503	sp|P08246|ELNE_HUMAN	1	8	43.8	28.518	267	886290000	62	73858000	1	1	1	1	3	2	2	5	7
CTSG	P08311	CATG_HUMAN	+	cellsurface			+		+																			Cathepsin G OS=Homo sapiens OX=9606 GN=CTSG PE=1 SV=2	sp|P08311|CATG_HUMAN	0.0014844	3.1069	sp|P08311|CATG_HUMAN	1	9	46.3	28.837	255	744010000	62	49601000	1	1	1	1	1	1	2	2	4
MGP	P08493	MGP_HUMAN	+	cellsurface			+		+																			Matrix Gla protein OS=Homo sapiens OX=9606 GN=MGP PE=1 SV=2;Isoform 2 of Matrix Gla protein OS=Homo sapiens OX=9606 GN=MGP	sp|P08493|MGP_HUMAN;sp|P08493-2|MGP_HUMAN	0.0011813	7.1552	sp|P08493|MGP_HUMAN;sp|P08493-2|MGP_HUMAN	2	2	23.3	12.353	103	6897200000	379	1724300000	1	1	12	12	11	11	24	22	46
LPA	P08519	APOA_HUMAN	+	serum/plasma	apolipo																							Apolipoprotein(a) OS=Homo sapiens OX=9606 GN=LPA PE=1 SV=1	sp|P08519|APOA_HUMAN	0	323.31	sp|P08519|APOA_HUMAN;sp|Q16609|LPAL2_HUMAN	2	76	54.6	501.31	4548	747090000000	12036	4343500000	1	1	12	12	12	12	24	24	48
PDHA1	P08559	ODPA_HUMAN	+	cellpart							+																	Pyruvate dehydrogenase E1 component subunit alpha, somatic form, mitochondrial OS=Homo sapiens OX=9606 GN=PDHA1 PE=1 SV=3;Isoform 4 of Pyruvate dehydrogenase E1 component subunit alpha, somatic form, mitochondrial OS=Homo sapiens OX=9606 GN=PDHA1;Isoform 3	sp|P08559|ODPA_HUMAN;sp|P08559-4|ODPA_HUMAN;sp|P08559-3|ODPA_HUMAN;sp|P08559-2|ODPA_HUMAN	0	108.09	sp|P08559|ODPA_HUMAN;sp|P08559-4|ODPA_HUMAN;sp|P08559-3|ODPA_HUMAN;sp|P08559-2|ODPA_HUMAN	4	11	42.6	43.295	390	4785100000	395	217510000	1	1	6	6	11	11	12	22	34
PLEK	P08567	PLEK_HUMAN	+	cellpart							+																	Pleckstrin OS=Homo sapiens OX=9606 GN=PLEK PE=1 SV=3	sp|P08567|PLEK_HUMAN	0	323.31	sp|P08567|PLEK_HUMAN	1	46	87.4	40.124	350	469740000000	7914	42704000000	1	1	12	12	12	12	24	24	48
CYC1	P08574	CY1_HUMAN	+	cellmembrane							+																	Cytochrome c1, heme protein, mitochondrial OS=Homo sapiens OX=9606 GN=CYC1 PE=1 SV=3	sp|P08574|CY1_HUMAN	0	125.4	sp|P08574|CY1_HUMAN	1	12	53.8	35.422	325	10051000000	800	628220000	1	1	7	8	11	11	15	22	37
CFH	P08603	CFAH_HUMAN	+	serum/plasma	compl		+	+	+	+	+																	Complement factor H OS=Homo sapiens OX=9606 GN=CFH PE=1 SV=4	sp|P08603|CFAH_HUMAN	0	323.31	sp|P08603|CFAH_HUMAN;sp|P08603-2|CFAH_HUMAN	2	110	74.7	139.09	1231	620510000000	16802	10172000000	1	1	12	12	12	12	24	24	48
VIM	P08670	VIME_HUMAN	+	cellpart		focal adhesion	+		+		+																+	;Vimentin OS=Homo sapiens OX=9606 GN=VIM PE=1 SV=4	CON__sp|P08670|VIME_HUMAN;sp|P08670|VIME_HUMAN	0	149	CON__sp|P08670|VIME_HUMAN;sp|P08670|VIME_HUMAN;sp|Q16352|AINX_HUMAN	3	20	47.9	53.651	466	3107400000	275	97106000	1	1	4	5	8	9	9	17	26
SERPINF2	P08697	A2AP_HUMAN	+	serum/plasma	other		+	+	+	+	+																	Alpha-2-antiplasmin OS=Homo sapiens OX=9606 GN=SERPINF2 PE=1 SV=3;Isoform 2 of Alpha-2-antiplasmin OS=Homo sapiens OX=9606 GN=SERPINF2	sp|P08697|A2AP_HUMAN;sp|P08697-2|A2AP_HUMAN	0	323.31	sp|P08697|A2AP_HUMAN;sp|P08697-2|A2AP_HUMAN	2	24	69	54.565	491	41334000000	3274	2296300000	1	1	12	12	12	12	24	24	48
KRT19	P08727	K1C19_HUMAN	+	cellpart			+		+																		+	Keratin, type I cytoskeletal 19 OS=Homo sapiens OX=9606 GN=KRT19 PE=1 SV=4;	sp|P08727|K1C19_HUMAN;CON__sp|P08727|K1C19_HUMAN	0.0015966	4.5082	sp|P08727|K1C19_HUMAN;CON__sp|P08727|K1C19_HUMAN	2	4	31.5	44.105	400	443350000	7	14302000	0	0	0	0	0	0	0	0	0
GNAI3	P08754	GNAI3_HUMAN	+	cellpart			+		+		+																	Guanine nucleotide-binding protein G(i) subunit alpha OS=Homo sapiens OX=9606 GN=GNAI3 PE=1 SV=3	sp|P08754|GNAI3_HUMAN	0	110.14	sp|P08754|GNAI3_HUMAN	1	11	60.7	40.532	354	2073900000	355	138260000	1	1	7	9	11	11	16	22	38
ANXA5	P08758	ANXA5_HUMAN	+	cellsurface		focal adhesion	+		+		+																	Annexin A5 OS=Homo sapiens OX=9606 GN=ANXA5 PE=1 SV=2	sp|P08758|ANXA5_HUMAN	0	201.48	sp|P08758|ANXA5_HUMAN	1	18	67.5	35.936	320	4973100000	572	226050000	1	1	10	10	12	12	20	24	44
KRT16	P08779	K1C16_HUMAN	+	cellpart			+		+		+																+	Keratin, type I cytoskeletal 16 OS=Homo sapiens OX=9606 GN=KRT16 PE=1 SV=4;	sp|P08779|K1C16_HUMAN;CON__sp|P08779|K1C16_HUMAN	0	314.98	sp|P08779|K1C16_HUMAN;CON__sp|P08779|K1C16_HUMAN	2	30	75.7	51.267	473	3155000000	331	101770000	1	1	6	7	3	2	13	5	18
RPSA	P08865	RSSA_HUMAN	+	cellmembrane			+		+		+																	40S ribosomal protein SA OS=Homo sapiens OX=9606 GN=RPSA PE=1 SV=4	sp|P08865|RSSA_HUMAN	0	33.465	sp|P08865|RSSA_HUMAN	1	6	31.2	32.854	295	865830000	76	66603000	1	1	1	0	6	6	1	12	13
ADRA2A	P08913	ADA2A_HUMAN	+	cellmembrane							+																	Alpha-2A adrenergic receptor OS=Homo sapiens OX=9606 GN=ADRA2A PE=1 SV=3	sp|P08913|ADA2A_HUMAN	0.001694	5.9647	sp|P08913|ADA2A_HUMAN	1	2	6.9	48.956	450	121440000	18	8674000	0	1	0	0	1	2	0	3	3
ENO2	P09104	ENOG_HUMAN	+	cellpart			+		+		+																	Gamma-enolase OS=Homo sapiens OX=9606 GN=ENO2 PE=1 SV=3;Isoform 2 of Gamma-enolase OS=Homo sapiens OX=9606 GN=ENO2	sp|P09104|ENOG_HUMAN;sp|P09104-2|ENOG_HUMAN	0	130.78	sp|P09104|ENOG_HUMAN;sp|P09104-2|ENOG_HUMAN	2	19	74.7	47.268	434	7829500000	710	391470000	1	1	6	7	10	10	13	20	33
ACAA1	P09110	THIK_HUMAN	+	cellpart							+																	3-ketoacyl-CoA thiolase, peroxisomal OS=Homo sapiens OX=9606 GN=ACAA1 PE=1 SV=2;Isoform 2 of 3-ketoacyl-CoA thiolase, peroxisomal OS=Homo sapiens OX=9606 GN=ACAA1	sp|P09110|THIK_HUMAN;sp|P09110-2|THIK_HUMAN	0	67.577	sp|P09110|THIK_HUMAN;sp|P09110-2|THIK_HUMAN	2	15	73.6	44.292	424	1949200000	230	108290000	1	1	1	0	12	12	1	24	25
GSTP1	P09211	GSTP1_HUMAN	+	cellpart			+		+		+																	Glutathione S-transferase P OS=Homo sapiens OX=9606 GN=GSTP1 PE=1 SV=2	sp|P09211|GSTP1_HUMAN	0	323.31	sp|P09211|GSTP1_HUMAN	1	20	92.4	23.356	210	61993000000	2509	6199300000	1	1	12	12	12	12	24	24	48
LGALS1	P09382	LEG1_HUMAN	+	cellsurface			+		+		+																	Galectin-1 OS=Homo sapiens OX=9606 GN=LGALS1 PE=1 SV=2	sp|P09382|LEG1_HUMAN	0	323.31	sp|P09382|LEG1_HUMAN	1	14	88.1	14.716	135	17504000000	893	1944900000	1	1	11	11	12	12	22	24	46
QDPR	P09417	DHPR_HUMAN	+	cellpart			+		+		+																	Dihydropteridine reductase OS=Homo sapiens OX=9606 GN=QDPR PE=1 SV=2;Isoform 2 of Dihydropteridine reductase OS=Homo sapiens OX=9606 GN=QDPR	sp|P09417|DHPR_HUMAN;sp|P09417-2|DHPR_HUMAN	0.00067159	12.279	sp|P09417|DHPR_HUMAN;sp|P09417-2|DHPR_HUMAN	2	7	47.1	25.789	244	1227500000	111	87678000	0	1	0	0	7	7	0	14	14
SPARC	P09486	SPRC_HUMAN	+	cellsurface							+																	SPARC OS=Homo sapiens OX=9606 GN=SPARC PE=1 SV=1	sp|P09486|SPRC_HUMAN	0	224.59	sp|P09486|SPRC_HUMAN	1	27	67	34.632	303	116680000000	3081	8975300000	1	1	11	12	12	12	23	24	47
GSTM1	P09488	GSTM1_HUMAN	+	cellpart							+																	Glutathione S-transferase Mu 1 OS=Homo sapiens OX=9606 GN=GSTM1 PE=1 SV=3;Isoform 2 of Glutathione S-transferase Mu 1 OS=Homo sapiens OX=9606 GN=GSTM1;Isoform 2 of Glutathione S-transferase Mu 4 OS=Homo sapiens OX=9606 GN=GSTM4;Glutathione S-transferase Mu	sp|P09488|GSTM1_HUMAN;sp|P09488-2|GSTM1_HUMAN;sp|Q03013-2|GSTM4_HUMAN;sp|Q03013|GSTM4_HUMAN	0.0016741	5.6683	sp|P09488|GSTM1_HUMAN;sp|P09488-2|GSTM1_HUMAN;sp|Q03013-2|GSTM4_HUMAN;sp|Q03013|GSTM4_HUMAN	4	4	26.1	25.712	218	81494000	25	5093400	0	1	0	0	2	3	0	5	5
TPM1	P09493-8	TPM1_HUMAN	+	cellpart							+																	Isoform 8 of Tropomyosin alpha-1 chain OS=Homo sapiens OX=9606 GN=TPM1	sp|P09493-8|TPM1_HUMAN	0	323.31	sp|P09493-8|TPM1_HUMAN	1	51	89.8	32.816	284	235040000000	4903	13826000000	1	1	11	12	12	12	23	24	47
CLTA	P09496-2	CLCA_HUMAN	+	cellmembrane							+																	Isoform Non-brain of Clathrin light chain A OS=Homo sapiens OX=9606 GN=CLTA;Isoform 4 of Clathrin light chain A OS=Homo sapiens OX=9606 GN=CLTA;Isoform 3 of Clathrin light chain A OS=Homo sapiens OX=9606 GN=CLTA;Clathrin light chain A OS=Homo sapiens OX=96	sp|P09496-2|CLCA_HUMAN;sp|P09496-4|CLCA_HUMAN;sp|P09496-3|CLCA_HUMAN;sp|P09496|CLCA_HUMAN;sp|P09496-5|CLCA_HUMAN	0	323.31	sp|P09496-2|CLCA_HUMAN;sp|P09496-4|CLCA_HUMAN;sp|P09496-3|CLCA_HUMAN;sp|P09496|CLCA_HUMAN;sp|P09496-5|CLCA_HUMAN	5	10	33.9	23.662	218	18078000000	755	2582600000	1	1	11	11	12	12	22	24	46
CLTB	P09497-2	CLCB_HUMAN	+	cellmembrane							+																	Isoform Non-brain of Clathrin light chain B OS=Homo sapiens OX=9606 GN=CLTB;Clathrin light chain B OS=Homo sapiens OX=9606 GN=CLTB PE=1 SV=1	sp|P09497-2|CLCB_HUMAN;sp|P09497|CLCB_HUMAN	0	31.566	sp|P09497-2|CLCB_HUMAN;sp|P09497|CLCB_HUMAN	2	9	33.6	23.181	211	1948500000	255	216500000	1	1	7	6	11	11	13	22	35
ANXA4	P09525	ANXA4_HUMAN	+	cellsurface			+		+		+																	Annexin A4 OS=Homo sapiens OX=9606 GN=ANXA4 PE=1 SV=4;Isoform 2 of Annexin A4 OS=Homo sapiens OX=9606 GN=ANXA4	sp|P09525|ANXA4_HUMAN;sp|P09525-2|ANXA4_HUMAN	0	15.473	sp|P09525|ANXA4_HUMAN;sp|P09525-2|ANXA4_HUMAN	2	11	51.7	35.882	319	1563600000	188	71074000	1	1	3	5	11	11	8	22	30
CNP	P09543-2	CN37_HUMAN	+	cellmembrane			+		+		+																	Isoform CNPI of 2,3-cyclic-nucleotide 3-phosphodiesterase OS=Homo sapiens OX=9606 GN=CNP;2,3-cyclic-nucleotide 3-phosphodiesterase OS=Homo sapiens OX=9606 GN=CNP PE=1 SV=2	sp|P09543-2|CN37_HUMAN;sp|P09543|CN37_HUMAN	0	59.315	sp|P09543-2|CN37_HUMAN;sp|P09543|CN37_HUMAN	2	8	31.7	45.098	401	1331700000	271	49324000	1	1	2	2	11	11	4	22	26
DLD	P09622	DLDH_HUMAN	+	cellpart							+																	Dihydrolipoyl dehydrogenase, mitochondrial OS=Homo sapiens OX=9606 GN=DLD PE=1 SV=2;Isoform 3 of Dihydrolipoyl dehydrogenase, mitochondrial OS=Homo sapiens OX=9606 GN=DLD;Isoform 2 of Dihydrolipoyl dehydrogenase, mitochondrial OS=Homo sapiens OX=9606 GN=DL	sp|P09622|DLDH_HUMAN;sp|P09622-3|DLDH_HUMAN;sp|P09622-2|DLDH_HUMAN	0	301.91	sp|P09622|DLDH_HUMAN;sp|P09622-3|DLDH_HUMAN;sp|P09622-2|DLDH_HUMAN	3	19	51.9	54.177	509	16111000000	1318	732300000	1	1	10	11	12	12	21	24	45
COX6C	P09669	COX6C_HUMAN	+	cellmembrane							+																	Cytochrome c oxidase subunit 6C OS=Homo sapiens OX=9606 GN=COX6C PE=1 SV=2	sp|P09669|COX6C_HUMAN	0.0017442	6.6807	sp|P09669|COX6C_HUMAN	1	6	61.3	8.7813	75	6689400000	260	1672300000	1	1	3	5	11	11	8	22	30
C1S	P09871	C1S_HUMAN	+	serum/plasma	coag			+		+	+																	Complement C1s subcomponent OS=Homo sapiens OX=9606 GN=C1S PE=1 SV=1	sp|P09871|C1S_HUMAN	0	323.31	sp|P09871|C1S_HUMAN	1	49	57.6	76.684	688	197040000000	4518	8209900000	1	1	12	12	12	12	24	24	48
LTA4H	P09960-2	LKHA4_HUMAN	+	cellpart			+		+		+																	Isoform 2 of Leukotriene A-4 hydrolase OS=Homo sapiens OX=9606 GN=LTA4H;Leukotriene A-4 hydrolase OS=Homo sapiens OX=9606 GN=LTA4H PE=1 SV=2;Isoform 3 of Leukotriene A-4 hydrolase OS=Homo sapiens OX=9606 GN=LTA4H;Isoform 4 of Leukotriene A-4 hydrolase OS=H	sp|P09960-2|LKHA4_HUMAN;sp|P09960|LKHA4_HUMAN;sp|P09960-3|LKHA4_HUMAN;sp|P09960-4|LKHA4_HUMAN	0.0016051	4.5836	sp|P09960-2|LKHA4_HUMAN;sp|P09960|LKHA4_HUMAN;sp|P09960-3|LKHA4_HUMAN;sp|P09960-4|LKHA4_HUMAN	4	6	15.2	59.732	532	112340000	14	4160600	0	1	0	0	2	1	0	3	3
ALDOC	P09972	ALDOC_HUMAN	+	cellpart			+		+		+																	Fructose-bisphosphate aldolase C OS=Homo sapiens OX=9606 GN=ALDOC PE=1 SV=2	sp|P09972|ALDOC_HUMAN	0	35.712	sp|P09972|ALDOC_HUMAN	1	4	31	39.455	364	417940000	51	18997000	1	1	1	0	4	7	1	11	12
C4A	P0C0L4	CO4A_HUMAN	+	serum/plasma	compl	Cell junction	+	+	+	+	+																	Complement C4-A OS=Homo sapiens OX=9606 GN=C4A PE=1 SV=2;Isoform 2 of Complement C4-A OS=Homo sapiens OX=9606 GN=C4A	sp|P0C0L4|CO4A_HUMAN;sp|P0C0L4-2|CO4A_HUMAN	0	92.333	sp|P0C0L4|CO4A_HUMAN;sp|P0C0L4-2|CO4A_HUMAN	2	9	76.3	192.78	1744	29908000000	1076	373860000	1	1	12	12	12	12	24	24	48
C4B	P0C0L5	CO4B_HUMAN	+	serum/plasma	compl	Cell junction	+	+	+	+																		Complement C4-B OS=Homo sapiens OX=9606 GN=C4B PE=1 SV=2	sp|P0C0L5|CO4B_HUMAN	0	323.31	sp|P0C0L5|CO4B_HUMAN	1	152	76.6	192.75	1744	1366200000000	32451	17078000000	1	1	12	12	12	12	24	24	48
CLEC2L	P0C7M8	CLC2L_HUMAN	+	cellmembrane							+																	C-type lectin domain family 2 member L OS=Homo sapiens OX=9606 GN=CLEC2L PE=3 SV=1	sp|P0C7M8|CLC2L_HUMAN	0	35.22	sp|P0C7M8|CLC2L_HUMAN	1	6	38.8	23.926	214	1817400000	232	151450000	1	1	4	3	9	9	7	18	25
SLFN14	P0C7P3-2	SLN14_HUMAN	+	cellpart							+																	Isoform 2 of Protein SLFN14 OS=Homo sapiens OX=9606 GN=SLFN14;Protein SLFN14 OS=Homo sapiens OX=9606 GN=SLFN14 PE=1 SV=2	sp|P0C7P3-2|SLN14_HUMAN;sp|P0C7P3|SLN14_HUMAN	0.0012099	7.9304	sp|P0C7P3-2|SLN14_HUMAN;sp|P0C7P3|SLN14_HUMAN	2	10	16.7	102.26	896	640040000	52	14885000	0	1	0	0	9	10	0	19	19
IGLC6	P0CF74	IGLC6_HUMAN	+	serum/plasma	IG																							Immunoglobulin lambda constant 6 OS=Homo sapiens OX=9606 GN=IGLC6 PE=1 SV=1	sp|P0CF74|IGLC6_HUMAN	0.0015182	3.5012	sp|P0CF74|IGLC6_HUMAN	1	2	81.1	11.276	106	145870000	3	24312000	0	0	0	0	0	0	0	0	0
SAA1	P0DJI8	SAA1_HUMAN	+	serum/plasma	other		+		+																			Serum amyloid A-1 protein OS=Homo sapiens OX=9606 GN=SAA1 PE=1 SV=1	sp|P0DJI8|SAA1_HUMAN	0	323.31	sp|P0DJI8|SAA1_HUMAN;sp|P0DJI9-2|SAA2_HUMAN	2	17	84.4	13.532	122	542200000000	3137	77458000000	1	1	12	12	12	12	24	24	48
SAA2	P0DJI9	SAA2_HUMAN	+	serum/plasma	other		+		+																			Serum amyloid A-2 protein OS=Homo sapiens OX=9606 GN=SAA2 PE=1 SV=1	sp|P0DJI9|SAA2_HUMAN	0	268.09	sp|P0DJI9|SAA2_HUMAN	1	8	78.7	13.527	122	87260000000	563	12466000000	1	1	9	10	6	6	19	12	31
SULT1A4	P0DMN0	ST1A4_HUMAN	+	cellpart																								Sulfotransferase 1A4 OS=Homo sapiens OX=9606 GN=SULT1A4 PE=1 SV=1;Sulfotransferase 1A3 OS=Homo sapiens OX=9606 GN=SULT1A3 PE=1 SV=1;Isoform 3 of Sulfotransferase 1A3 OS=Homo sapiens OX=9606 GN=SULT1A3;Isoform 2 of Sulfotransferase 1A3 OS=Homo sapiens OX=96	sp|P0DMN0|ST1A4_HUMAN;sp|P0DMM9|ST1A3_HUMAN;sp|P0DMM9-3|ST1A3_HUMAN;sp|P0DMM9-2|ST1A3_HUMAN	0	97.296	sp|P0DMN0|ST1A4_HUMAN;sp|P0DMM9|ST1A3_HUMAN;sp|P0DMM9-3|ST1A3_HUMAN;sp|P0DMM9-2|ST1A3_HUMAN	4	11	62	34.196	295	4331900000	569	270740000	1	1	9	8	12	12	17	24	41
HSPA1A	P0DMV8	HS71A_HUMAN	+	cellpart		focal adhesion	+	+	+	+																		Heat shock 70 kDa protein 1A OS=Homo sapiens OX=9606 GN=HSPA1A PE=1 SV=1;Heat shock 70 kDa protein 1B OS=Homo sapiens OX=9606 GN=HSPA1B PE=1 SV=1;Isoform 2 of Heat shock 70 kDa protein 1A OS=Homo sapiens OX=9606 GN=HSPA1A	sp|P0DMV8|HS71A_HUMAN;sp|P0DMV9|HS71B_HUMAN;sp|P0DMV8-2|HS71A_HUMAN	0	323.31	sp|P0DMV8|HS71A_HUMAN;sp|P0DMV9|HS71B_HUMAN;sp|P0DMV8-2|HS71A_HUMAN	3	49	79.4	70.051	641	54970000000	4281	1717800000	1	1	12	12	12	12	24	24	48
IGA2	P0DOX2	IGA2_HUMAN	+	serum/plasma	IG																							Immunoglobulin alpha-2 heavy chain OS=Homo sapiens OX=9606 PE=1 SV=2	sp|P0DOX2|IGA2_HUMAN	0	208.64	sp|P0DOX2|IGA2_HUMAN	1	14	61.8	48.934	455	56858000000	1367	2707500000	1	1	12	12	12	12	24	24	48
IGD	P0DOX3	IGD_HUMAN	+	serum/plasma	IG																							Immunoglobulin delta heavy chain OS=Homo sapiens OX=9606 PE=1 SV=1;Immunoglobulin heavy constant delta OS=Homo sapiens OX=9606 GN=IGHD PE=1 SV=3;Isoform 2 of Immunoglobulin heavy constant delta OS=Homo sapiens OX=9606 GN=IGHD	sp|P0DOX3|IGD_HUMAN;sp|P01880|IGHD_HUMAN;sp|P01880-2|IGHD_HUMAN	0	33.76	sp|P0DOX3|IGD_HUMAN;sp|P01880|IGHD_HUMAN;sp|P01880-2|IGHD_HUMAN	3	7	23.8	56.224	512	430540000	67	18719000	1	1	3	3	4	4	6	8	14
IGG1	P0DOX5	IGG1_HUMAN	+	serum/plasma	IG																							Immunoglobulin gamma-1 heavy chain OS=Homo sapiens OX=9606 PE=1 SV=2	sp|P0DOX5|IGG1_HUMAN	0	323.31	sp|P0DOX5|IGG1_HUMAN	1	47	64.4	49.328	449	12030000000000	29619	546820000000	1	1	12	12	12	12	24	24	48
IGM	P0DOX6	IGM_HUMAN	+	serum/plasma	IG																							Immunoglobulin mu heavy chain OS=Homo sapiens OX=9606 PE=1 SV=2	sp|P0DOX6|IGM_HUMAN	0	50.739	sp|P0DOX6|IGM_HUMAN	1	8	56.6	63.485	576	11797000000	64	406780000	1	1	4	3	4	5	7	9	16
IGK	P0DOX7	IGK_HUMAN	+	serum/plasma	IG																							Immunoglobulin kappa light chain OS=Homo sapiens OX=9606 PE=1 SV=1	sp|P0DOX7|IGK_HUMAN	0	81.908	sp|P0DOX7|IGK_HUMAN	1	6	68.2	23.379	214	35215000000	1628	3912800000	1	1	12	12	12	12	24	24	48
IGL1	P0DOX8	IGL1_HUMAN	+	serum/plasma	IG																							Immunoglobulin lambda-1 light chain OS=Homo sapiens OX=9606 PE=1 SV=1;Immunoglobulin lambda-like polypeptide 5 OS=Homo sapiens OX=9606 GN=IGLL5 PE=2 SV=2;Immunoglobulin lambda constant 1 OS=Homo sapiens OX=9606 GN=IGLC1 PE=1 SV=1	sp|P0DOX8|IGL1_HUMAN;sp|B9A064|IGLL5_HUMAN;sp|P0CG04|IGLC1_HUMAN	0	323.31	sp|P0DOX8|IGL1_HUMAN;sp|B9A064|IGLL5_HUMAN;sp|P0CG04|IGLC1_HUMAN	3	16	60.6	22.83	216	117310000000	3937	11731000000	1	1	12	12	12	12	24	24	48
IGLC3	P0DOY3	IGLC3_HUMAN	+	serum/plasma	IG		+	+	+	+																		Immunoglobulin lambda constant 3 OS=Homo sapiens OX=9606 GN=IGLC3 PE=1 SV=1	sp|P0DOY3|IGLC3_HUMAN	0	323.31	sp|P0DOY3|IGLC3_HUMAN	1	21	100	11.265	106	2102900000000	9500	300410000000	1	1	12	12	12	12	24	24	48
IGHV1-8	P0DP01	HV108_HUMAN	+	serum/plasma	IG																							Immunoglobulin heavy variable 1-8 OS=Homo sapiens OX=9606 GN=IGHV1-8 PE=3 SV=1	sp|P0DP01|HV108_HUMAN	0.0017401	6.6438	sp|P0DP01|HV108_HUMAN	1	2	43.6	12.992	117	39374000	11	6562400	1	0	1	1	0	0	2	0	2
IGHV3-30-5	P0DP03	HV335_HUMAN	+	serum/plasma	IG																							Immunoglobulin heavy variable 3-30-5 OS=Homo sapiens OX=9606 GN=IGHV3-30-5 PE=3 SV=1;Immunoglobulin heavy variable 3-30 OS=Homo sapiens OX=9606 GN=IGHV3-30 PE=1 SV=2	sp|P0DP03|HV335_HUMAN;sp|P01768|HV330_HUMAN	0	71.633	sp|P0DP03|HV335_HUMAN;sp|P01768|HV330_HUMAN	2	3	63.2	12.947	117	4269400000	163	609910000	1	1	4	4	9	9	8	18	26
IGKV1-13	P0DP09	KV113_HUMAN	+	serum/plasma	IG																							Immunoglobulin kappa variable 1-13 OS=Homo sapiens OX=9606 GN=IGKV1-13 PE=3 SV=1;Immunoglobulin kappa variable 1D-13 OS=Homo sapiens OX=9606 GN=IGKV1D-13 PE=3 SV=1	sp|P0DP09|KV113_HUMAN;sp|A0A0B4J2D9|KVD13_HUMAN	0	50.395	sp|P0DP09|KV113_HUMAN;sp|A0A0B4J2D9|KVD13_HUMAN	2	3	31.6	12.569	117	1265200000	132	316310000	1	1	5	5	5	5	10	10	20
CALM3	P0DP25	CALM3_HUMAN	+	cellpart																								Calmodulin-3 OS=Homo sapiens OX=9606 GN=CALM3 PE=1 SV=1;Calmodulin-2 OS=Homo sapiens OX=9606 GN=CALM2 PE=1 SV=1;Calmodulin-1 OS=Homo sapiens OX=9606 GN=CALM1 PE=1 SV=1	sp|P0DP25|CALM3_HUMAN;sp|P0DP24|CALM2_HUMAN;sp|P0DP23|CALM1_HUMAN	0	196.01	sp|P0DP25|CALM3_HUMAN;sp|P0DP24|CALM2_HUMAN;sp|P0DP23|CALM1_HUMAN;sp|P27482|CALL3_HUMAN	4	10	92.6	16.837	149	6501500000	654	722390000	1	1	11	11	11	11	22	22	44
GATD3A	P0DPI2	GAL3A_HUMAN	+	cellpart																								Glutamine amidotransferase-like class 1 domain-containing protein 3A, mitochondrial OS=Homo sapiens OX=9606 GN=GATD3A PE=1 SV=1;Glutamine amidotransferase-like class 1 domain-containing protein 3B, mitochondrial OS=Homo sapiens OX=9606 GN=GATD3B PE=1 SV=1;	sp|P0DPI2|GAL3A_HUMAN;sp|A0A0B4J2D5|GAL3B_HUMAN;sp|P0DPI2-2|GAL3A_HUMAN;sp|A0A0B4J2D5-2|GAL3B_HUMAN	0	134.03	sp|P0DPI2|GAL3A_HUMAN;sp|A0A0B4J2D5|GAL3B_HUMAN;sp|P0DPI2-2|GAL3A_HUMAN;sp|A0A0B4J2D5-2|GAL3B_HUMAN	4	16	73.1	28.17	268	15184000000	1204	1084600000	1	1	10	9	12	12	19	24	43
SRGN	P10124	SRGN_HUMAN	+	cellpart							+																	Serglycin OS=Homo sapiens OX=9606 GN=SRGN PE=1 SV=3	sp|P10124|SRGN_HUMAN	0	95.675	sp|P10124|SRGN_HUMAN	1	7	34.2	17.652	158	50259000000	1148	12565000000	1	1	10	12	12	12	22	24	46
COX8A	P10176	COX8A_HUMAN	+	cellmembrane							+																	Cytochrome c oxidase subunit 8A, mitochondrial OS=Homo sapiens OX=9606 GN=COX8A PE=1 SV=2	sp|P10176|COX8A_HUMAN	0.00064433	10.238	sp|P10176|COX8A_HUMAN	1	2	50.7	7.579	69	87281000	8	29094000	0	0	0	0	0	0	0	0	0
RRAS	P10301	RRAS_HUMAN	+	cellmembrane		focal adhesion	+		+		+																	Ras-related protein R-Ras OS=Homo sapiens OX=9606 GN=RRAS PE=1 SV=1	sp|P10301|RRAS_HUMAN	0	15.384	sp|P10301|RRAS_HUMAN	1	8	49.5	23.48	218	1230100000	139	82005000	1	1	2	3	10	10	5	20	25
HLA-C	P10321	1C07_HUMAN	+	cellmembrane			+		+		+																	HLA class I histocompatibility antigen, Cw-7 alpha chain OS=Homo sapiens OX=9606 GN=HLA-C PE=1 SV=3	sp|P10321|1C07_HUMAN	0	34.737	sp|P10321|1C07_HUMAN	1	3	49.7	40.648	366	9934500000	451	620910000	1	1	11	11	12	12	22	24	46
DLAT	P10515	ODP2_HUMAN	+	cellpart							+																	Dihydrolipoyllysine-residue acetyltransferase component of pyruvate dehydrogenase complex, mitochondrial OS=Homo sapiens OX=9606 GN=DLAT PE=1 SV=3	sp|P10515|ODP2_HUMAN	0	14.278	sp|P10515|ODP2_HUMAN	1	7	20.7	68.996	647	607680000	89	18990000	1	1	1	2	4	3	3	7	10
TXN	P10599	THIO_HUMAN	+	cellpart			+		+		+																	Thioredoxin OS=Homo sapiens OX=9606 GN=TXN PE=1 SV=3;Isoform 2 of Thioredoxin OS=Homo sapiens OX=9606 GN=TXN	sp|P10599|THIO_HUMAN;sp|P10599-2|THIO_HUMAN	0	76.159	sp|P10599|THIO_HUMAN;sp|P10599-2|THIO_HUMAN	2	10	66.7	11.737	105	13656000000	904	1950900000	1	1	10	11	12	12	21	24	45
COX5B	P10606	COX5B_HUMAN	+	cellpart							+																	Cytochrome c oxidase subunit 5B, mitochondrial OS=Homo sapiens OX=9606 GN=COX5B PE=1 SV=2	sp|P10606|COX5B_HUMAN	0	112.86	sp|P10606|COX5B_HUMAN	1	12	65.1	13.696	129	18934000000	704	2366800000	1	1	9	10	12	12	19	24	43
CTSA	P10619-2	PPGB_HUMAN	+	cellpart			+		+		+																	Isoform 2 of Lysosomal protective protein OS=Homo sapiens OX=9606 GN=CTSA;Lysosomal protective protein OS=Homo sapiens OX=9606 GN=CTSA PE=1 SV=2	sp|P10619-2|PPGB_HUMAN;sp|P10619|PPGB_HUMAN	0	323.31	sp|P10619-2|PPGB_HUMAN;sp|P10619|PPGB_HUMAN	2	16	41.3	52.488	463	7625100000	740	423620000	1	1	8	8	11	11	16	22	38
C7	P10643	CO7_HUMAN	+	serum/plasma	compl		+		+		+																	Complement component C7 OS=Homo sapiens OX=9606 GN=C7 PE=1 SV=2	sp|P10643|CO7_HUMAN	0	323.31	sp|P10643|CO7_HUMAN	1	31	48.3	93.517	843	17027000000	2096	395980000	1	1	12	11	11	11	23	22	45
PRKAR1A	P10644	KAP0_HUMAN	+	cellmembrane							+																	cAMP-dependent protein kinase type I-alpha regulatory subunit OS=Homo sapiens OX=9606 GN=PRKAR1A PE=1 SV=1;Isoform 2 of cAMP-dependent protein kinase type I-alpha regulatory subunit OS=Homo sapiens OX=9606 GN=PRKAR1A	sp|P10644|KAP0_HUMAN;sp|P10644-2|KAP0_HUMAN	0	148.54	sp|P10644|KAP0_HUMAN;sp|P10644-2|KAP0_HUMAN	2	25	64.3	42.981	381	133530000000	2076	7028000000	1	1	12	12	12	12	24	24	48
CHGA	P10645	CMGA_HUMAN	+	cellpart																								Chromogranin-A OS=Homo sapiens OX=9606 GN=CHGA PE=1 SV=7	sp|P10645|CMGA_HUMAN	0	69.107	sp|P10645|CMGA_HUMAN	1	15	58.4	50.688	457	519010000	118	25951000	1	1	3	4	1	2	7	3	10
TFPI	P10646	TFPI1_HUMAN	+	cellmembrane							+																	Tissue factor pathway inhibitor OS=Homo sapiens OX=9606 GN=TFPI PE=1 SV=1;Isoform Beta of Tissue factor pathway inhibitor OS=Homo sapiens OX=9606 GN=TFPI	sp|P10646|TFPI1_HUMAN;sp|P10646-2|TFPI1_HUMAN	0	52.318	sp|P10646|TFPI1_HUMAN;sp|P10646-2|TFPI1_HUMAN	2	8	27	35.015	304	3282300000	349	273530000	1	1	8	9	11	11	17	22	39
PF4V1	P10720	PF4V_HUMAN	+	cellsurface							+																	Platelet factor 4 variant OS=Homo sapiens OX=9606 GN=PF4V1 PE=1 SV=1	sp|P10720|PF4V_HUMAN	0	323.31	sp|P10720|PF4V_HUMAN	1	14	68.3	11.553	104	1600100000000	4606	266690000000	1	1	12	12	12	12	24	24	48
ESD	P10768	ESTD_HUMAN	+	cellpart			+		+		+																	S-formylglutathione hydrolase OS=Homo sapiens OX=9606 GN=ESD PE=1 SV=2	sp|P10768|ESTD_HUMAN	0	73.679	sp|P10768|ESTD_HUMAN	1	20	90.8	31.462	282	7756500000	976	554030000	1	1	9	9	11	11	18	22	40
HSPD1	P10809	CH60_HUMAN	+	cellmembrane			+		+		+																	60 kDa heat shock protein, mitochondrial OS=Homo sapiens OX=9606 GN=HSPD1 PE=1 SV=2	sp|P10809|CH60_HUMAN	0	323.31	sp|P10809|CH60_HUMAN;sp|P10809-2|CH60_HUMAN	2	70	86.9	61.054	573	219870000000	8089	6662800000	1	1	12	12	12	12	24	24	48
CLU	P10909-2	CLUS_HUMAN	+	serum/plasma	apolipo		+	+	+	+	+																	Isoform 2 of Clusterin OS=Homo sapiens OX=9606 GN=CLU	sp|P10909-2|CLUS_HUMAN	0	323.31	sp|P10909-2|CLUS_HUMAN	1	46	52.7	57.832	501	1493400000000	10952	67884000000	1	1	12	12	12	12	24	24	48
HSPA5	P11021	BIP_HUMAN	+	cellmembrane		focal adhesion	+		+																			Endoplasmic reticulum chaperone BiP OS=Homo sapiens OX=9606 GN=HSPA5 PE=1 SV=2	sp|P11021|BIP_HUMAN	0	323.31	sp|P11021|BIP_HUMAN	1	71	85.9	72.332	654	496450000000	11425	15514000000	1	1	12	12	12	12	24	24	48
LAMC1	P11047	LAMC1_HUMAN	+	cellsurface			+		+		+																	Laminin subunit gamma-1 OS=Homo sapiens OX=9606 GN=LAMC1 PE=1 SV=3	sp|P11047|LAMC1_HUMAN	0	58.146	sp|P11047|LAMC1_HUMAN	1	19	17.9	177.6	1609	1054800000	202	15511000	0	1	0	0	11	11	0	22	22
ACP2	P11117	PPAL_HUMAN	+	cellmembrane			+		+		+																	Lysosomal acid phosphatase OS=Homo sapiens OX=9606 GN=ACP2 PE=1 SV=3	sp|P11117|PPAL_HUMAN	0.0024004	2.5475	sp|P11117|PPAL_HUMAN;sp|P11117-2|PPAL_HUMAN	2	4	11.6	48.344	423	183400000	27	9652800	0	1	0	0	4	6	0	10	10
HSPA8	P11142	HSP7C_HUMAN	+	cellpart		focal adhesion	+	+	+	+	+																	Heat shock cognate 71 kDa protein OS=Homo sapiens OX=9606 GN=HSPA8 PE=1 SV=1;Isoform 2 of Heat shock cognate 71 kDa protein OS=Homo sapiens OX=9606 GN=HSPA8	sp|P11142|HSP7C_HUMAN;sp|P11142-2|HSP7C_HUMAN	0	323.31	sp|P11142|HSP7C_HUMAN;sp|P11142-2|HSP7C_HUMAN	2	66	85.6	70.897	646	405000000000	9938	12273000000	1	1	12	12	12	12	24	24	48
SLC2A1	P11166	GTR1_HUMAN	+	cellmembrane			+	+	+	+	+																	Solute carrier family 2, facilitated glucose transporter member 1 OS=Homo sapiens OX=9606 GN=SLC2A1 PE=1 SV=2	sp|P11166|GTR1_HUMAN	0	74.212	sp|P11166|GTR1_HUMAN	1	7	12.4	54.083	492	16146000000	936	1242000000	1	1	12	12	11	11	24	22	46
SLC2A3	P11169	GTR3_HUMAN	+	cellmembrane			+		+		+																	Solute carrier family 2, facilitated glucose transporter member 3 OS=Homo sapiens OX=9606 GN=SLC2A3 PE=1 SV=1	sp|P11169|GTR3_HUMAN	0	323.31	sp|P11169|GTR3_HUMAN;sp|Q8TDB8-4|GTR14_HUMAN;sp|Q8TDB8-2|GTR14_HUMAN;sp|Q8TDB8|GTR14_HUMAN	4	20	43.1	53.924	496	146080000000	1910	14608000000	1	1	12	12	12	12	24	24	48
EPB41	P11171-2	41_HUMAN	+	cellpart		Cell junction					+																	Isoform 2 of Protein 4.1 OS=Homo sapiens OX=9606 GN=EPB41;Protein 4.1 OS=Homo sapiens OX=9606 GN=EPB41 PE=1 SV=4;Isoform 4 of Protein 4.1 OS=Homo sapiens OX=9606 GN=EPB41;Isoform 3 of Protein 4.1 OS=Homo sapiens OX=9606 GN=EPB41;Isoform 7 of Protein 4.1 OS	sp|P11171-2|41_HUMAN;sp|P11171|41_HUMAN;sp|P11171-4|41_HUMAN;sp|P11171-3|41_HUMAN;sp|P11171-7|41_HUMAN;sp|P11171-5|41_HUMAN;sp|P11171-6|41_HUMAN	0	150.65	sp|P11171-2|41_HUMAN;sp|P11171|41_HUMAN;sp|P11171-4|41_HUMAN;sp|P11171-3|41_HUMAN;sp|P11171-7|41_HUMAN;sp|P11171-5|41_HUMAN;sp|P11171-6|41_HUMAN	7	40	51.4	93.237	831	11915000000	1411	283690000	1	1	12	12	11	11	24	22	46
PDHB	P11177	ODPB_HUMAN	+	cellpart							+																	Pyruvate dehydrogenase E1 component subunit beta, mitochondrial OS=Homo sapiens OX=9606 GN=PDHB PE=1 SV=3;Isoform 2 of Pyruvate dehydrogenase E1 component subunit beta, mitochondrial OS=Homo sapiens OX=9606 GN=PDHB;Isoform 3 of Pyruvate dehydrogenase E1 co	sp|P11177|ODPB_HUMAN;sp|P11177-2|ODPB_HUMAN;sp|P11177-3|ODPB_HUMAN	0	119.07	sp|P11177|ODPB_HUMAN;sp|P11177-2|ODPB_HUMAN;sp|P11177-3|ODPB_HUMAN	3	19	70.2	39.233	359	11715000000	1116	650810000	1	1	7	6	11	12	13	23	36
DBT	P11182	ODB2_HUMAN	+	cellpart							+																	Lipoamide acyltransferase component of branched-chain alpha-keto acid dehydrogenase complex, mitochondrial OS=Homo sapiens OX=9606 GN=DBT PE=1 SV=3	sp|P11182|ODB2_HUMAN	0.00066401	11.619	sp|P11182|ODB2_HUMAN	1	9	42.3	53.486	482	465080000	94	18603000	0	1	0	0	10	10	0	20	20
PYGB	P11216	PYGB_HUMAN	+	cellpart			+		+		+																	Glycogen phosphorylase, brain form OS=Homo sapiens OX=9606 GN=PYGB PE=1 SV=5	sp|P11216|PYGB_HUMAN	0	249.8	sp|P11216|PYGB_HUMAN	1	56	65.1	96.695	843	18605000000	1832	379680000	1	1	11	9	12	12	20	24	44
MBL2	P11226	MBL2_HUMAN	+	cellsurface																								Mannose-binding protein C OS=Homo sapiens OX=9606 GN=MBL2 PE=1 SV=2	sp|P11226|MBL2_HUMAN	0	26.202	sp|P11226|MBL2_HUMAN	1	5	33.1	26.143	248	205150000	19	13677000	0	1	0	0	4	4	0	8	8
RALA	P11233	RALA_HUMAN	+	cellmembrane		focal adhesion	+		+		+																	Ras-related protein Ral-A OS=Homo sapiens OX=9606 GN=RALA PE=1 SV=1	sp|P11233|RALA_HUMAN	0.0015314	3.6431	sp|P11233|RALA_HUMAN	1	3	56.3	23.567	206	1039000000	133	103900000	1	1	2	3	10	10	5	20	25
RALB	P11234-2	RALB_HUMAN	+	cellmembrane			+		+		+																	Isoform 2 of Ras-related protein Ral-B OS=Homo sapiens OX=9606 GN=RALB;Ras-related protein Ral-B OS=Homo sapiens OX=9606 GN=RALB PE=1 SV=1;Isoform 3 of Ras-related protein Ral-B OS=Homo sapiens OX=9606 GN=RALB	sp|P11234-2|RALB_HUMAN;sp|P11234|RALB_HUMAN;sp|P11234-3|RALB_HUMAN	0	323.31	sp|P11234-2|RALB_HUMAN;sp|P11234|RALB_HUMAN;sp|P11234-3|RALB_HUMAN	3	18	62.3	25.966	228	16574000000	1320	1506700000	1	1	10	11	12	12	21	24	45
SPTB	P11277	SPTB1_HUMAN	+	cellpart							+																	Spectrin beta chain, erythrocytic OS=Homo sapiens OX=9606 GN=SPTB PE=1 SV=5;Isoform 3 of Spectrin beta chain, erythrocytic OS=Homo sapiens OX=9606 GN=SPTB	sp|P11277|SPTB1_HUMAN;sp|P11277-3|SPTB1_HUMAN	0	323.31	sp|P11277|SPTB1_HUMAN;sp|P11277-3|SPTB1_HUMAN	2	165	77.2	246.47	2137	84335000000	10372	664060000	1	1	12	12	12	12	24	24	48
ACADM	P11310	ACADM_HUMAN	+	cellpart							+																	Medium-chain specific acyl-CoA dehydrogenase, mitochondrial OS=Homo sapiens OX=9606 GN=ACADM PE=1 SV=1;Isoform 2 of Medium-chain specific acyl-CoA dehydrogenase, mitochondrial OS=Homo sapiens OX=9606 GN=ACADM	sp|P11310|ACADM_HUMAN;sp|P11310-2|ACADM_HUMAN	0	285.25	sp|P11310|ACADM_HUMAN;sp|P11310-2|ACADM_HUMAN	2	23	58.9	46.588	421	9418600000	971	470930000	1	1	8	7	12	12	15	24	39
G6PD	P11413	G6PD_HUMAN	+	cellpart			+		+		+																	Glucose-6-phosphate 1-dehydrogenase OS=Homo sapiens OX=9606 GN=G6PD PE=1 SV=4;Isoform 3 of Glucose-6-phosphate 1-dehydrogenase OS=Homo sapiens OX=9606 GN=G6PD;Isoform Long of Glucose-6-phosphate 1-dehydrogenase OS=Homo sapiens OX=9606 GN=G6PD	sp|P11413|G6PD_HUMAN;sp|P11413-3|G6PD_HUMAN;sp|P11413-2|G6PD_HUMAN	0	240.82	sp|P11413|G6PD_HUMAN;sp|P11413-3|G6PD_HUMAN;sp|P11413-2|G6PD_HUMAN	3	31	71.8	59.256	515	35737000000	2517	1051100000	1	1	11	11	12	12	22	24	46
MTHFD1	P11586	C1TC_HUMAN	+	cellpart			+		+		+																	C-1-tetrahydrofolate synthase, cytoplasmic OS=Homo sapiens OX=9606 GN=MTHFD1 PE=1 SV=3	sp|P11586|C1TC_HUMAN	0	41.506	sp|P11586|C1TC_HUMAN	1	24	37.9	101.56	935	1660100000	223	32551000	0	1	0	0	12	12	0	24	24
CETP	P11597	CETP_HUMAN	+	cellsurface			+		+																			Cholesteryl ester transfer protein OS=Homo sapiens OX=9606 GN=CETP PE=1 SV=2;Isoform 2 of Cholesteryl ester transfer protein OS=Homo sapiens OX=9606 GN=CETP	sp|P11597|CETP_HUMAN;sp|P11597-2|CETP_HUMAN	0	67.836	sp|P11597|CETP_HUMAN;sp|P11597-2|CETP_HUMAN	2	18	51.5	54.756	493	10034000000	1486	436260000	1	1	12	12	11	11	24	22	46
ADH5	P11766	ADHX_HUMAN	+	cellpart			+		+		+																	Alcohol dehydrogenase class-3 OS=Homo sapiens OX=9606 GN=ADH5 PE=1 SV=4	sp|P11766|ADHX_HUMAN	0	204.34	sp|P11766|ADHX_HUMAN	1	22	80.5	39.724	374	10122000000	874	632600000	1	1	6	6	12	12	12	24	36
PRPS2	P11908	PRPS2_HUMAN	+	cellpart							+																	Ribose-phosphate pyrophosphokinase 2 OS=Homo sapiens OX=9606 GN=PRPS2 PE=1 SV=2;Isoform 2 of Ribose-phosphate pyrophosphokinase 2 OS=Homo sapiens OX=9606 GN=PRPS2	sp|P11908|PRPS2_HUMAN;sp|P11908-2|PRPS2_HUMAN	0	22.666	sp|P11908|PRPS2_HUMAN;sp|P11908-2|PRPS2_HUMAN	2	7	32.4	34.769	318	1750000000	257	109380000	1	1	3	4	12	12	7	24	31
PABPC1	P11940-2	PABP1_HUMAN	+	cellpart		focal adhesion	+		+		+																	Isoform 2 of Polyadenylate-binding protein 1 OS=Homo sapiens OX=9606 GN=PABPC1;Polyadenylate-binding protein 1 OS=Homo sapiens OX=9606 GN=PABPC1 PE=1 SV=2	sp|P11940-2|PABP1_HUMAN;sp|P11940|PABP1_HUMAN	0	17.268	sp|P11940-2|PABP1_HUMAN;sp|P11940|PABP1_HUMAN;sp|Q9H361|PABP3_HUMAN	3	7	20.1	61.18	547	652460000	93	21749000	1	1	3	3	8	10	6	18	24
COX6A1	P12074	CX6A1_HUMAN	+	cellpart							+																	Cytochrome c oxidase subunit 6A1, mitochondrial OS=Homo sapiens OX=9606 GN=COX6A1 PE=1 SV=4	sp|P12074|CX6A1_HUMAN	0	25.385	sp|P12074|CX6A1_HUMAN	1	4	64.2	12.155	109	5843500000	223	1168700000	1	1	1	0	11	11	1	22	23
HARS	P12081-3	SYHC_HUMAN	+	cellpart							+																	Isoform 3 of Histidine--tRNA ligase, cytoplasmic OS=Homo sapiens OX=9606 GN=HARS;Isoform 2 of Histidine--tRNA ligase, cytoplasmic OS=Homo sapiens OX=9606 GN=HARS;Isoform 4 of Histidine--tRNA ligase, cytoplasmic OS=Homo sapiens OX=9606 GN=HARS;Histidine--tR	sp|P12081-3|SYHC_HUMAN;sp|P12081-2|SYHC_HUMAN;sp|P12081-4|SYHC_HUMAN;sp|P12081|SYHC_HUMAN	0	31.671	sp|P12081-3|SYHC_HUMAN;sp|P12081-2|SYHC_HUMAN;sp|P12081-4|SYHC_HUMAN;sp|P12081|SYHC_HUMAN	4	3	11.6	50.156	449	357560000	71	14303000	0	1	0	0	7	8	0	15	15
COL6A3	P12111-2	CO6A3_HUMAN	+	cellsurface			+		+		+																	Isoform 2 of Collagen alpha-3(VI) chain OS=Homo sapiens OX=9606 GN=COL6A3;Collagen alpha-3(VI) chain OS=Homo sapiens OX=9606 GN=COL6A3 PE=1 SV=5;Isoform 4 of Collagen alpha-3(VI) chain OS=Homo sapiens OX=9606 GN=COL6A3;Isoform 3 of Collagen alpha-3(VI) cha	sp|P12111-2|CO6A3_HUMAN;sp|P12111|CO6A3_HUMAN;sp|P12111-4|CO6A3_HUMAN;sp|P12111-3|CO6A3_HUMAN;sp|P12111-5|CO6A3_HUMAN	0	17.187	sp|P12111-2|CO6A3_HUMAN;sp|P12111|CO6A3_HUMAN;sp|P12111-4|CO6A3_HUMAN;sp|P12111-3|CO6A3_HUMAN;sp|P12111-5|CO6A3_HUMAN	5	22	13.9	321.35	2971	1263100000	278	8309700	1	1	10	10	7	7	20	14	34
SLC25A6	P12236	ADT3_HUMAN	+	cellmembrane							+																	ADP/ATP translocase 3 OS=Homo sapiens OX=9606 GN=SLC25A6 PE=1 SV=4;ADP/ATP translocase 1 OS=Homo sapiens OX=9606 GN=SLC25A4 PE=1 SV=4	sp|P12236|ADT3_HUMAN;sp|P12235|ADT1_HUMAN	0	138.84	sp|P12236|ADT3_HUMAN;sp|P12235|ADT1_HUMAN	2	13	70.5	32.866	298	17459000000	973	872960000	1	1	11	12	12	12	23	24	47
F5	P12259	FA5_HUMAN	+	serum/plasma	coag						+																	Coagulation factor V OS=Homo sapiens OX=9606 GN=F5 PE=1 SV=4	sp|P12259|FA5_HUMAN	0	323.31	sp|P12259|FA5_HUMAN	1	134	47.6	251.7	2224	414370000000	13524	4762900000	1	1	12	12	12	12	24	24	48
IMPDH2	P12268	IMDH2_HUMAN	+	cellpart			+		+		+																	Inosine-5-monophosphate dehydrogenase 2 OS=Homo sapiens OX=9606 GN=IMPDH2 PE=1 SV=2	sp|P12268|IMDH2_HUMAN	0.0017513	6.7739	sp|P12268|IMDH2_HUMAN	1	3	17.3	55.804	514	38572000	5	1836700	0	0	0	0	0	0	0	0	0
PIP	P12273	PIP_HUMAN	+	cellsurface			+		+																			Prolactin-inducible protein OS=Homo sapiens OX=9606 GN=PIP PE=1 SV=1	sp|P12273|PIP_HUMAN	0.001955	2.8669	sp|P12273|PIP_HUMAN	1	4	34.9	16.572	146	145890000	11	16210000	0	0	0	0	0	0	0	0	0
CKB	P12277	KCRB_HUMAN	+	cellpart			+		+																			Creatine kinase B-type OS=Homo sapiens OX=9606 GN=CKB PE=1 SV=1	sp|P12277|KCRB_HUMAN	0	97.701	sp|P12277|KCRB_HUMAN	1	14	60.1	42.644	381	2007900000	189	125500000	1	1	2	1	3	3	3	6	9
ANXA3	P12429	ANXA3_HUMAN	+	cellpart			+		+		+																	Annexin A3 OS=Homo sapiens OX=9606 GN=ANXA3 PE=1 SV=3	sp|P12429|ANXA3_HUMAN	0	30.223	sp|P12429|ANXA3_HUMAN	1	10	38.7	36.375	323	1250400000	192	56834000	1	1	6	6	8	9	12	17	29
ACTN1	P12814-3	ACTN1_HUMAN	+	cellpart		Cell junction	+		+		+																	Isoform 3 of Alpha-actinin-1 OS=Homo sapiens OX=9606 GN=ACTN1	sp|P12814-3|ACTN1_HUMAN	0	323.31	sp|P12814-3|ACTN1_HUMAN	1	155	96.4	105.57	914	2860300000000	34760	52005000000	1	1	12	12	12	12	24	24	48
MYL4	P12829	MYL4_HUMAN	+	cellpart							+																	Myosin light chain 4 OS=Homo sapiens OX=9606 GN=MYL4 PE=1 SV=3	sp|P12829|MYL4_HUMAN	0	27.179	sp|P12829|MYL4_HUMAN	1	8	72.1	21.564	197	1397000000	172	107460000	1	1	5	3	5	5	8	10	18
SRC	P12931	SRC_HUMAN	+	cellmembrane		Endosome	+		+		+																	Proto-oncogene tyrosine-protein kinase Src OS=Homo sapiens OX=9606 GN=SRC PE=1 SV=3;Isoform 2 of Proto-oncogene tyrosine-protein kinase Src OS=Homo sapiens OX=9606 GN=SRC	sp|P12931|SRC_HUMAN;sp|P12931-2|SRC_HUMAN	0	323.31	sp|P12931|SRC_HUMAN;sp|P12931-2|SRC_HUMAN;sp|P42685-2|FRK_HUMAN;sp|P42685|FRK_HUMAN	4	30	76.9	59.834	536	50229000000	2562	2092900000	1	1	12	12	12	12	24	24	48
PEPD	P12955	PEPD_HUMAN	+	cellpart			+		+		+																	Xaa-Pro dipeptidase OS=Homo sapiens OX=9606 GN=PEPD PE=1 SV=3;Isoform 2 of Xaa-Pro dipeptidase OS=Homo sapiens OX=9606 GN=PEPD;Isoform 3 of Xaa-Pro dipeptidase OS=Homo sapiens OX=9606 GN=PEPD	sp|P12955|PEPD_HUMAN;sp|P12955-2|PEPD_HUMAN;sp|P12955-3|PEPD_HUMAN	0	29.99	sp|P12955|PEPD_HUMAN;sp|P12955-2|PEPD_HUMAN;sp|P12955-3|PEPD_HUMAN	3	4	17	54.548	493	462140000	74	21007000	0	1	0	0	8	7	0	15	15
COX4I1	P13073	COX41_HUMAN	+	cellpart							+																	Cytochrome c oxidase subunit 4 isoform 1, mitochondrial OS=Homo sapiens OX=9606 GN=COX4I1 PE=1 SV=1	sp|P13073|COX41_HUMAN	0	32.385	sp|P13073|COX41_HUMAN	1	14	49.7	19.576	169	17472000000	853	1588400000	1	1	10	10	12	12	20	24	44
RNH1	P13489	RINI_HUMAN	+	cellpart			+		+		+																	Ribonuclease inhibitor OS=Homo sapiens OX=9606 GN=RNH1 PE=1 SV=2	sp|P13489|RINI_HUMAN	0	207.43	sp|P13489|RINI_HUMAN	1	24	82	49.973	461	7396900000	713	284490000	1	1	9	10	12	12	19	24	43
CYBA	P13498	CY24A_HUMAN	+	cellmembrane		focal adhesion																						Cytochrome b-245 light chain OS=Homo sapiens OX=9606 GN=CYBA PE=1 SV=3	sp|P13498|CY24A_HUMAN	0.0015175	3.4936	sp|P13498|CY24A_HUMAN	1	2	28.7	21.012	195	209130000	20	29875000	1	1	1	1	0	1	2	1	3
CCL5	P13501	CCL5_HUMAN	+	cellsurface							+																	C-C motif chemokine 5 OS=Homo sapiens OX=9606 GN=CCL5 PE=1 SV=3	sp|P13501|CCL5_HUMAN	0	20.625	sp|P13501|CCL5_HUMAN	1	8	51.6	9.9896	91	54189000000	685	13547000000	1	1	9	11	12	12	20	24	44
EEF2	P13639	EF2_HUMAN	+	cellpart			+		+		+																	Elongation factor 2 OS=Homo sapiens OX=9606 GN=EEF2 PE=1 SV=4	sp|P13639|EF2_HUMAN	0	69.812	sp|P13639|EF2_HUMAN;sp|Q15029-2|U5S1_HUMAN;sp|Q15029-3|U5S1_HUMAN;sp|Q15029|U5S1_HUMAN	4	26	43.1	95.337	858	1765700000	277	39237000	1	1	5	5	9	8	10	17	27
KRT10	P13645	K1C10_HUMAN	+	cellsurface			+		+		+																+	Keratin, type I cytoskeletal 10 OS=Homo sapiens OX=9606 GN=KRT10 PE=1 SV=6;	sp|P13645|K1C10_HUMAN;CON__sp|P13645|K1C10_HUMAN	0	323.31	sp|P13645|K1C10_HUMAN;CON__sp|P13645|K1C10_HUMAN;sp|Q7Z3Z0|K1C25_HUMAN;CON__sp|Q7Z3Z0|K1C25_HUMAN;sp|Q2M2I5|K1C24_HUMAN;CON__sp|Q2M2I5|K1C24_HUMAN;sp|Q7Z3Y9|K1C26_HUMAN;CON__sp|Q7Z3Y9|K1C26_HUMAN	8	40	68.2	58.826	584	53411000000	3327	2054300000	1	1	12	12	11	11	24	22	46
KRT13	P13646-3	K1C13_HUMAN	+	cellpart			+		+		+																+	Isoform 3 of Keratin, type I cytoskeletal 13 OS=Homo sapiens OX=9606 GN=KRT13;;Keratin, type I cytoskeletal 13 OS=Homo sapiens OX=9606 GN=KRT13 PE=1 SV=4;;Isoform 2 of Keratin, type I cytoskeletal 13 OS=Homo sapiens OX=9606 GN=KRT13;	sp|P13646-3|K1C13_HUMAN;CON__sp|P13646-3|K1C13_HUMAN;sp|P13646|K1C13_HUMAN;CON__sp|P13646|K1C13_HUMAN;sp|P13646-2|K1C13_HUMAN;CON__sp|P13646-2|K1C13_HUMAN	0	174.5	sp|P13646-3|K1C13_HUMAN;CON__sp|P13646-3|K1C13_HUMAN;sp|P13646|K1C13_HUMAN;CON__sp|P13646|K1C13_HUMAN;sp|P13646-2|K1C13_HUMAN;CON__sp|P13646-2|K1C13_HUMAN	6	12	47.9	45.867	420	554870000	38	21341000	0	0	0	0	0	0	0	0	0
KRT5	P13647	K2C5_HUMAN	+	cellpart			+		+		+																+	Keratin, type II cytoskeletal 5 OS=Homo sapiens OX=9606 GN=KRT5 PE=1 SV=3;	sp|P13647|K2C5_HUMAN;CON__sp|P13647|K2C5_HUMAN	0	75.556	sp|P13647|K2C5_HUMAN;CON__sp|P13647|K2C5_HUMAN	2	13	33.4	62.378	590	2741700000	137	88441000	1	1	8	9	1	1	17	2	19
PDIA4	P13667	PDIA4_HUMAN	+	cellpart							+																	Protein disulfide-isomerase A4 OS=Homo sapiens OX=9606 GN=PDIA4 PE=1 SV=2	sp|P13667|PDIA4_HUMAN	0	323.31	sp|P13667|PDIA4_HUMAN	1	41	58.6	72.932	645	23981000000	1962	631070000	1	1	7	10	12	12	17	24	41
C6	P13671	CO6_HUMAN	+	serum/plasma	compl		+		+		+																	Complement component C6 OS=Homo sapiens OX=9606 GN=C6 PE=1 SV=3	sp|P13671|CO6_HUMAN	0	266.99	sp|P13671|CO6_HUMAN	1	45	62.1	104.79	934	16427000000	1995	357110000	1	1	12	12	12	12	24	24	48
TPT1	P13693	TCTP_HUMAN	+	cellpart			+		+		+																	Translationally-controlled tumor protein OS=Homo sapiens OX=9606 GN=TPT1 PE=1 SV=1;Isoform 2 of Translationally-controlled tumor protein OS=Homo sapiens OX=9606 GN=TPT1	sp|P13693|TCTP_HUMAN;sp|P13693-2|TCTP_HUMAN	0	75.485	sp|P13693|TCTP_HUMAN;sp|P13693-2|TCTP_HUMAN;sp|Q56UQ5|TPT1L_HUMAN	3	9	76.2	19.595	172	6725200000	526	840640000	1	1	8	10	11	11	18	22	40
ALAD	P13716	HEM2_HUMAN	+	cellpart			+		+		+																	Delta-aminolevulinic acid dehydratase OS=Homo sapiens OX=9606 GN=ALAD PE=1 SV=1;Isoform 2 of Delta-aminolevulinic acid dehydratase OS=Homo sapiens OX=9606 GN=ALAD	sp|P13716|HEM2_HUMAN;sp|P13716-2|HEM2_HUMAN	0	57.184	sp|P13716|HEM2_HUMAN;sp|P13716-2|HEM2_HUMAN	2	19	82.7	36.294	330	5397600000	553	359840000	1	1	6	7	10	11	13	21	34
HLA-E	P13747	HLAE_HUMAN	+	cellmembrane			+		+		+																	HLA class I histocompatibility antigen, alpha chain E OS=Homo sapiens OX=9606 GN=HLA-E PE=1 SV=4	sp|P13747|HLAE_HUMAN	0	113.99	sp|P13747|HLAE_HUMAN	1	13	63.7	40.057	358	11626000000	775	683910000	1	1	7	7	10	10	14	20	34
LCP1	P13796	PLSL_HUMAN	+	cellpart		Cell junction	+		+		+																	Plastin-2 OS=Homo sapiens OX=9606 GN=LCP1 PE=1 SV=6	sp|P13796|PLSL_HUMAN	0	64.771	sp|P13796|PLSL_HUMAN;sp|P13796-2|PLSL_HUMAN	2	27	55.2	70.288	627	3538600000	777	93122000	1	1	11	11	11	10	22	21	43
PLS3	P13797-3	PLST_HUMAN	+	cellpart							+																	Isoform 3 of Plastin-3 OS=Homo sapiens OX=9606 GN=PLS3;Isoform 2 of Plastin-3 OS=Homo sapiens OX=9606 GN=PLS3;Plastin-3 OS=Homo sapiens OX=9606 GN=PLS3 PE=1 SV=4	sp|P13797-3|PLST_HUMAN;sp|P13797-2|PLST_HUMAN;sp|P13797|PLST_HUMAN	0	14.597	sp|P13797-3|PLST_HUMAN;sp|P13797-2|PLST_HUMAN;sp|P13797|PLST_HUMAN	3	9	35	65.632	585	359050000	51	10259000	0	1	0	0	5	6	0	11	11
APEH	P13798	ACPH_HUMAN	+	cellpart			+		+		+																	Acylamino-acid-releasing enzyme OS=Homo sapiens OX=9606 GN=APEH PE=1 SV=4	sp|P13798|ACPH_HUMAN	0	13.357	sp|P13798|ACPH_HUMAN	1	13	31.1	81.224	732	376000000	53	12533000	1	1	2	2	4	6	4	10	14
ETFA	P13804	ETFA_HUMAN	+	cellpart							+																	Electron transfer flavoprotein subunit alpha, mitochondrial OS=Homo sapiens OX=9606 GN=ETFA PE=1 SV=1;Isoform 2 of Electron transfer flavoprotein subunit alpha, mitochondrial OS=Homo sapiens OX=9606 GN=ETFA	sp|P13804|ETFA_HUMAN;sp|P13804-2|ETFA_HUMAN	0	323.31	sp|P13804|ETFA_HUMAN;sp|P13804-2|ETFA_HUMAN	2	24	76	35.079	333	35636000000	2725	1781800000	1	1	11	12	12	12	23	24	47
PRKAR2A	P13861-2	KAP2_HUMAN	+	cellpart		focal adhesion	+		+		+																	Isoform 2 of cAMP-dependent protein kinase type II-alpha regulatory subunit OS=Homo sapiens OX=9606 GN=PRKAR2A;cAMP-dependent protein kinase type II-alpha regulatory subunit OS=Homo sapiens OX=9606 GN=PRKAR2A PE=1 SV=2	sp|P13861-2|KAP2_HUMAN;sp|P13861|KAP2_HUMAN	0.0016129	4.7027	sp|P13861-2|KAP2_HUMAN;sp|P13861|KAP2_HUMAN	2	4	27.2	43.066	382	43841000	8	1992800	0	1	0	0	1	2	0	3	3
MIF	P14174	MIF_HUMAN	+	cellsurface			+		+		+																	Macrophage migration inhibitory factor OS=Homo sapiens OX=9606 GN=MIF PE=1 SV=4	sp|P14174|MIF_HUMAN	0.0012369	8.9585	sp|P14174|MIF_HUMAN	1	3	35.7	12.476	115	10790000000	339	2697600000	1	1	9	11	12	12	20	24	44
PRKCSH	P14314-2	GLU2B_HUMAN	+	cellpart							+																	Isoform 2 of Glucosidase 2 subunit beta OS=Homo sapiens OX=9606 GN=PRKCSH;Glucosidase 2 subunit beta OS=Homo sapiens OX=9606 GN=PRKCSH PE=1 SV=2	sp|P14314-2|GLU2B_HUMAN;sp|P14314|GLU2B_HUMAN	0	323.31	sp|P14314-2|GLU2B_HUMAN;sp|P14314|GLU2B_HUMAN	2	25	53.9	59.177	525	35847000000	1794	2108700000	1	1	10	11	12	12	21	24	45
HCLS1	P14317	HCLS1_HUMAN	+	cellpart							+																	Hematopoietic lineage cell-specific protein OS=Homo sapiens OX=9606 GN=HCLS1 PE=1 SV=3	sp|P14317|HCLS1_HUMAN	0.0015781	4.3234	sp|P14317|HCLS1_HUMAN;sp|P14317-2|HCLS1_HUMAN	2	4	14.2	54.013	486	132090000	11	7338500	0	1	0	0	2	2	0	4	4
FDPS	P14324-2	FPPS_HUMAN	+	cellpart							+																	Isoform 2 of Farnesyl pyrophosphate synthase OS=Homo sapiens OX=9606 GN=FDPS;Farnesyl pyrophosphate synthase OS=Homo sapiens OX=9606 GN=FDPS PE=1 SV=4	sp|P14324-2|FPPS_HUMAN;sp|P14324|FPPS_HUMAN	0	31.323	sp|P14324-2|FPPS_HUMAN;sp|P14324|FPPS_HUMAN	2	9	32.3	40.532	353	2628700000	275	202210000	1	1	5	5	10	10	10	20	30
COX7A2	P14406	CX7A2_HUMAN	+	cellpart							+																	Cytochrome c oxidase subunit 7A2, mitochondrial OS=Homo sapiens OX=9606 GN=COX7A2 PE=1 SV=1	sp|P14406|CX7A2_HUMAN	0	12.772	sp|P14406|CX7A2_HUMAN	1	6	62.7	9.3959	83	3498500000	287	874630000	1	1	10	11	12	12	21	24	45
NID1	P14543	NID1_HUMAN	+	cellsurface			+		+		+																	Nidogen-1 OS=Homo sapiens OX=9606 GN=NID1 PE=1 SV=3;Isoform 2 of Nidogen-1 OS=Homo sapiens OX=9606 GN=NID1	sp|P14543|NID1_HUMAN;sp|P14543-2|NID1_HUMAN	0	323.31	sp|P14543|NID1_HUMAN;sp|P14543-2|NID1_HUMAN	2	61	71.9	136.38	1247	55624000000	3265	1183500000	1	1	8	8	11	11	16	22	38
AKR1A1	P14550	AK1A1_HUMAN	+	cellpart			+		+		+																	Aldo-keto reductase family 1 member A1 OS=Homo sapiens OX=9606 GN=AKR1A1 PE=1 SV=3	sp|P14550|AK1A1_HUMAN	0	20.647	sp|P14550|AK1A1_HUMAN	1	9	44.9	36.573	325	824300000	159	41215000	1	1	3	1	10	11	4	21	25
PLA2G2A	P14555	PA2GA_HUMAN	+	cellmembrane			+		+																			Phospholipase A2, membrane associated OS=Homo sapiens OX=9606 GN=PLA2G2A PE=1 SV=2	sp|P14555|PA2GA_HUMAN	0	13.839	sp|P14555|PA2GA_HUMAN	1	4	41.7	16.083	144	570720000	48	81531000	0	1	0	0	2	2	0	4	4
PKM	P14618	KPYM_HUMAN	+	cellsurface			+		+		+																	Pyruvate kinase PKM OS=Homo sapiens OX=9606 GN=PKM PE=1 SV=4;Isoform 3 of Pyruvate kinase PKM OS=Homo sapiens OX=9606 GN=PKM	sp|P14618|KPYM_HUMAN;sp|P14618-3|KPYM_HUMAN	0	323.31	sp|P14618|KPYM_HUMAN;sp|P14618-3|KPYM_HUMAN;sp|P30613-2|KPYR_HUMAN	3	76	93	57.936	531	870280000000	14058	29009000000	1	1	12	12	12	12	24	24	48
HSP90B1	P14625	ENPL_HUMAN	+	cellsurface		focal adhesion	+		+		+																	Endoplasmin OS=Homo sapiens OX=9606 GN=HSP90B1 PE=1 SV=1	sp|P14625|ENPL_HUMAN	0	323.31	sp|P14625|ENPL_HUMAN;sp|Q58FF3|ENPLL_HUMAN	2	86	76.7	92.468	803	346350000000	10291	8658900000	1	1	12	12	12	12	24	24	48
MMP9	P14780	MMP9_HUMAN	+	cellsurface			+		+																			Matrix metalloproteinase-9 OS=Homo sapiens OX=9606 GN=MMP9 PE=1 SV=3	sp|P14780|MMP9_HUMAN	0.00063776	9.907	sp|P14780|MMP9_HUMAN	1	10	23.9	78.457	707	684380000	30	19554000	1	1	2	3	1	3	5	4	9
COX6B1	P14854	CX6B1_HUMAN	+	cellpart							+																	Cytochrome c oxidase subunit 6B1 OS=Homo sapiens OX=9606 GN=COX6B1 PE=1 SV=2	sp|P14854|CX6B1_HUMAN	0	35.03	sp|P14854|CX6B1_HUMAN	1	7	86	10.192	86	20572000000	497	2938900000	1	1	9	10	12	12	19	24	43
DARS	P14868	SYDC_HUMAN	+	cellpart			+		+		+																	Aspartate--tRNA ligase, cytoplasmic OS=Homo sapiens OX=9606 GN=DARS PE=1 SV=2;Isoform 2 of Aspartate--tRNA ligase, cytoplasmic OS=Homo sapiens OX=9606 GN=DARS	sp|P14868|SYDC_HUMAN;sp|P14868-2|SYDC_HUMAN	0	72.013	sp|P14868|SYDC_HUMAN;sp|P14868-2|SYDC_HUMAN	2	15	41.3	57.136	501	1761400000	201	48926000	1	1	3	2	7	10	5	17	22
JUP	P14923	PLAK_HUMAN	+	cellmembrane		Cell junction	+		+																			Junction plakoglobin OS=Homo sapiens OX=9606 GN=JUP PE=1 SV=3	sp|P14923|PLAK_HUMAN	0	167.48	sp|P14923|PLAK_HUMAN	1	26	57.4	81.744	745	1352900000	93	31462000	1	0	1	1	0	0	2	0	2
UQCRB	P14927	QCR7_HUMAN	+	cellpart							+																	Cytochrome b-c1 complex subunit 7 OS=Homo sapiens OX=9606 GN=UQCRB PE=1 SV=2;Isoform 2 of Cytochrome b-c1 complex subunit 7 OS=Homo sapiens OX=9606 GN=UQCRB	sp|P14927|QCR7_HUMAN;sp|P14927-2|QCR7_HUMAN	0	46.469	sp|P14927|QCR7_HUMAN;sp|P14927-2|QCR7_HUMAN	2	10	68.5	13.53	111	12195000000	535	2032400000	1	1	4	3	12	12	7	24	31
FABP4	P15090	FABP4_HUMAN	+	cellpart			+		+																			Fatty acid-binding protein, adipocyte OS=Homo sapiens OX=9606 GN=FABP4 PE=1 SV=3	sp|P15090|FABP4_HUMAN	0.0012217	8.3184	sp|P15090|FABP4_HUMAN;sp|P02689|MYP2_HUMAN	2	3	31.8	14.719	132	75620000	51	10803000	1	0	7	6	0	0	13	0	13
AKR1B1	P15121	ALDR_HUMAN	+	cellpart			+		+		+																	Aldo-keto reductase family 1 member B1 OS=Homo sapiens OX=9606 GN=AKR1B1 PE=1 SV=3	sp|P15121|ALDR_HUMAN	0.0011806	7.1483	sp|P15121|ALDR_HUMAN	1	4	29.1	35.853	316	240830000	27	14167000	0	1	0	0	3	5	0	8	8
RAC2	P15153	RAC2_HUMAN	+	cellpart		focal adhesion	+		+		+																	Ras-related C3 botulinum toxin substrate 2 OS=Homo sapiens OX=9606 GN=RAC2 PE=1 SV=1	sp|P15153|RAC2_HUMAN	0	21.777	sp|P15153|RAC2_HUMAN;sp|Q9H4E5-2|RHOJ_HUMAN;sp|Q9H4E5|RHOJ_HUMAN	3	6	58.3	21.429	192	13427000000	732	1918200000	1	1	12	12	12	12	24	24	48
CPN1	P15169	CBPN_HUMAN	+	serum/plasma	other																							Carboxypeptidase N catalytic chain OS=Homo sapiens OX=9606 GN=CPN1 PE=1 SV=1	sp|P15169|CBPN_HUMAN	0.0015377	3.7812	sp|P15169|CBPN_HUMAN	1	4	15.5	52.286	458	63198000	23	3511000	1	0	2	1	0	0	3	0	3
GSPT1	P15170	ERF3A_HUMAN	+	cellpart							+																	Eukaryotic peptide chain release factor GTP-binding subunit ERF3A OS=Homo sapiens OX=9606 GN=GSPT1 PE=1 SV=1;Isoform 2 of Eukaryotic peptide chain release factor GTP-binding subunit ERF3A OS=Homo sapiens OX=9606 GN=GSPT1;Isoform 3 of Eukaryotic peptide cha	sp|P15170|ERF3A_HUMAN;sp|P15170-2|ERF3A_HUMAN;sp|P15170-3|ERF3A_HUMAN	0	62.295	sp|P15170|ERF3A_HUMAN;sp|P15170-2|ERF3A_HUMAN;sp|P15170-3|ERF3A_HUMAN;sp|Q8IYD1|ERF3B_HUMAN	4	19	56.7	55.755	499	2543400000	372	105980000	1	1	8	7	11	11	15	22	37
EZR	P15311	EZRI_HUMAN	+	cellmembrane		Endosome	+		+		+																	Ezrin OS=Homo sapiens OX=9606 GN=EZR PE=1 SV=4	sp|P15311|EZRI_HUMAN	0.0012422	9.1445	sp|P15311|EZRI_HUMAN	1	14	39.6	69.412	586	263010000	126	7735600	1	1	9	7	7	7	16	14	30
UCHL3	P15374	UCHL3_HUMAN	+	cellpart							+																	Ubiquitin carboxyl-terminal hydrolase isozyme L3 OS=Homo sapiens OX=9606 GN=UCHL3 PE=1 SV=1	sp|P15374|UCHL3_HUMAN	0.0015106	3.4563	sp|P15374|UCHL3_HUMAN	1	3	25.2	26.182	230	175540000	46	17554000	0	1	0	0	6	6	0	12	12
NME1	P15531	NDKA_HUMAN	+	cellpart			+		+		+																	Nucleoside diphosphate kinase A OS=Homo sapiens OX=9606 GN=NME1 PE=1 SV=1;Isoform 2 of Nucleoside diphosphate kinase A OS=Homo sapiens OX=9606 GN=NME1	sp|P15531|NDKA_HUMAN;sp|P15531-2|NDKA_HUMAN	0	43.494	sp|P15531|NDKA_HUMAN;sp|P15531-2|NDKA_HUMAN	2	4	86.2	17.149	152	1230700000	157	123070000	1	1	3	4	10	9	7	19	26
GNS	P15586-2	GNS_HUMAN	+	cellpart			+		+		+																	Isoform 2 of N-acetylglucosamine-6-sulfatase OS=Homo sapiens OX=9606 GN=GNS;N-acetylglucosamine-6-sulfatase OS=Homo sapiens OX=9606 GN=GNS PE=1 SV=3	sp|P15586-2|GNS_HUMAN;sp|P15586|GNS_HUMAN	0.0015641	4.1482	sp|P15586-2|GNS_HUMAN;sp|P15586|GNS_HUMAN	2	3	10.2	59.988	532	228370000	39	9515600	0	1	0	0	3	3	0	6	6
ST6GAL1	P15907	SIAT1_HUMAN	+	cellmembrane							+																	Beta-galactoside alpha-2,6-sialyltransferase 1 OS=Homo sapiens OX=9606 GN=ST6GAL1 PE=1 SV=1	sp|P15907|SIAT1_HUMAN	0.00065232	10.783	sp|P15907|SIAT1_HUMAN;sp|P15907-2|SIAT1_HUMAN	2	6	16.5	46.604	406	732330000	163	36617000	1	1	10	10	7	8	20	15	35
DSP	P15924	DESP_HUMAN	+	cellmembrane		Cell junction	+		+																		+	Desmoplakin OS=Homo sapiens OX=9606 GN=DSP PE=1 SV=3;;Isoform DSPIa of Desmoplakin OS=Homo sapiens OX=9606 GN=DSP;Isoform DPII of Desmoplakin OS=Homo sapiens OX=9606 GN=DSP;	sp|P15924|DESP_HUMAN;CON__sp|P15924|DESP_HUMAN;sp|P15924-3|DESP_HUMAN;sp|P15924-2|DESP_HUMAN;CON__sp|P15924-2|DESP_HUMAN	0	131.04	sp|P15924|DESP_HUMAN;CON__sp|P15924|DESP_HUMAN;sp|P15924-3|DESP_HUMAN;sp|P15924-2|DESP_HUMAN;CON__sp|P15924-2|DESP_HUMAN	5	51	24.3	331.77	2871	1233800000	137	7522900	0	1	0	0	1	0	0	1	1
COX7C	P15954	COX7C_HUMAN	+	cellmembrane							+																	Cytochrome c oxidase subunit 7C, mitochondrial OS=Homo sapiens OX=9606 GN=COX7C PE=1 SV=1	sp|P15954|COX7C_HUMAN	0	107.49	sp|P15954|COX7C_HUMAN	1	6	74.6	7.2454	63	4481300000	268	896250000	1	1	1	0	12	12	1	24	25
CBR1	P16152	CBR1_HUMAN	+	cellpart			+		+		+																	Carbonyl reductase [NADPH] 1 OS=Homo sapiens OX=9606 GN=CBR1 PE=1 SV=3	sp|P16152|CBR1_HUMAN	0	48.23	sp|P16152|CBR1_HUMAN;sp|P16152-2|CBR1_HUMAN;sp|O75828|CBR3_HUMAN	3	11	58.1	30.375	277	2005300000	279	117960000	1	1	3	3	9	10	6	19	25
ANK1	P16157-14	ANK1_HUMAN	+	cellpart							+																	Isoform Er13 of Ankyrin-1 OS=Homo sapiens OX=9606 GN=ANK1;Isoform Er7 of Ankyrin-1 OS=Homo sapiens OX=9606 GN=ANK1;Isoform Er11 of Ankyrin-1 OS=Homo sapiens OX=9606 GN=ANK1;Ankyrin-1 OS=Homo sapiens OX=9606 GN=ANK1 PE=1 SV=3;Isoform Er5 of Ankyrin-1 OS=Hom	sp|P16157-14|ANK1_HUMAN;sp|P16157-8|ANK1_HUMAN;sp|P16157-12|ANK1_HUMAN;sp|P16157|ANK1_HUMAN;sp|P16157-3|ANK1_HUMAN;sp|P16157-16|ANK1_HUMAN;sp|P16157-5|ANK1_HUMAN;sp|P16157-10|ANK1_HUMAN;sp|P16157-15|ANK1_HUMAN;sp|P16157-13|ANK1_HUMAN;sp|P16157-4|ANK1_HUMAN;sp|P16157-7|ANK1_HUMAN;sp|P16157-6|ANK1_HUMAN;sp|P16157-9|ANK1_HUMAN;sp|P16157-21|ANK1_HUMAN;sp|P16157-11|ANK1_HUMAN;sp|P16157-2|ANK1_HUMAN	0	323.31	sp|P16157-14|ANK1_HUMAN;sp|P16157-8|ANK1_HUMAN;sp|P16157-12|ANK1_HUMAN;sp|P16157|ANK1_HUMAN;sp|P16157-3|ANK1_HUMAN;sp|P16157-16|ANK1_HUMAN;sp|P16157-5|ANK1_HUMAN;sp|P16157-10|ANK1_HUMAN;sp|P16157-15|ANK1_HUMAN;sp|P16157-13|ANK1_HUMAN;sp|P16157-4|ANK1_HUMAN;sp|P16157-7|ANK1_HUMAN;sp|P16157-6|ANK1_HUMAN;sp|P16157-9|ANK1_HUMAN;sp|P16157-21|ANK1_HUMAN;sp|P16157-11|ANK1_HUMAN;sp|P16157-2|ANK1_HUMAN	17	100	65.3	217.48	1983	49848000000	5948	541830000	1	1	12	12	12	12	24	24	48
ACADS	P16219	ACADS_HUMAN	+	cellpart							+																	Short-chain specific acyl-CoA dehydrogenase, mitochondrial OS=Homo sapiens OX=9606 GN=ACADS PE=1 SV=1	sp|P16219|ACADS_HUMAN	0	63.348	sp|P16219|ACADS_HUMAN	1	5	23.5	44.297	412	658130000	97	34638000	0	1	0	0	8	8	0	16	16
GLB1	P16278	BGAL_HUMAN	+	cellpart			+		+		+																	Beta-galactosidase OS=Homo sapiens OX=9606 GN=GLB1 PE=1 SV=2;Isoform 3 of Beta-galactosidase OS=Homo sapiens OX=9606 GN=GLB1;Isoform 2 of Beta-galactosidase OS=Homo sapiens OX=9606 GN=GLB1	sp|P16278|BGAL_HUMAN;sp|P16278-3|BGAL_HUMAN;sp|P16278-2|BGAL_HUMAN	0	17.557	sp|P16278|BGAL_HUMAN;sp|P16278-3|BGAL_HUMAN;sp|P16278-2|BGAL_HUMAN	3	10	24.2	76.074	677	2897200000	443	120720000	1	1	5	5	11	11	10	22	32
EPB42	P16452-2	EPB42_HUMAN	+	cellmembrane																								Isoform Long of Erythrocyte membrane protein band 4.2 OS=Homo sapiens OX=9606 GN=EPB42;Erythrocyte membrane protein band 4.2 OS=Homo sapiens OX=9606 GN=EPB42 PE=1 SV=3;Isoform 3 of Erythrocyte membrane protein band 4.2 OS=Homo sapiens OX=9606 GN=EPB42	sp|P16452-2|EPB42_HUMAN;sp|P16452|EPB42_HUMAN;sp|P16452-3|EPB42_HUMAN	0	323.31	sp|P16452-2|EPB42_HUMAN;sp|P16452|EPB42_HUMAN;sp|P16452-3|EPB42_HUMAN	3	31	51.7	79.926	721	9520800000	1357	250550000	1	1	12	11	9	10	23	19	42
ATP2A2	P16615	AT2A2_HUMAN	+	cellmembrane							+																	Sarcoplasmic/endoplasmic reticulum calcium ATPase 2 OS=Homo sapiens OX=9606 GN=ATP2A2 PE=1 SV=1;Isoform 5 of Sarcoplasmic/endoplasmic reticulum calcium ATPase 2 OS=Homo sapiens OX=9606 GN=ATP2A2;Isoform 2 of Sarcoplasmic/endoplasmic reticulum calcium ATPas	sp|P16615|AT2A2_HUMAN;sp|P16615-5|AT2A2_HUMAN;sp|P16615-2|AT2A2_HUMAN;sp|P16615-3|AT2A2_HUMAN;sp|P16615-4|AT2A2_HUMAN	0	323.31	sp|P16615|AT2A2_HUMAN;sp|P16615-5|AT2A2_HUMAN;sp|P16615-2|AT2A2_HUMAN;sp|P16615-3|AT2A2_HUMAN;sp|P16615-4|AT2A2_HUMAN	5	49	52.7	114.76	1042	155550000000	6422	3381600000	1	1	12	12	12	12	24	24	48
PLCG2	P16885	PLCG2_HUMAN	+	cellpart			+		+		+																	1-phosphatidylinositol 4,5-bisphosphate phosphodiesterase gamma-2 OS=Homo sapiens OX=9606 GN=PLCG2 PE=1 SV=4	sp|P16885|PLCG2_HUMAN	0	12.69	sp|P16885|PLCG2_HUMAN	1	9	10.7	147.87	1265	198890000	33	3059900	0	1	0	0	3	3	0	6	6
FAH	P16930	FAAA_HUMAN	+	cellpart			+		+		+																	Fumarylacetoacetase OS=Homo sapiens OX=9606 GN=FAH PE=1 SV=2;Isoform 2 of Fumarylacetoacetase OS=Homo sapiens OX=9606 GN=FAH	sp|P16930|FAAA_HUMAN;sp|P16930-2|FAAA_HUMAN	0	44.013	sp|P16930|FAAA_HUMAN;sp|P16930-2|FAAA_HUMAN	2	16	66.6	46.374	419	2719100000	481	129480000	1	1	7	7	11	11	14	22	36
NAGA	P17050	NAGAB_HUMAN	+	cellpart			+		+		+																	Alpha-N-acetylgalactosaminidase OS=Homo sapiens OX=9606 GN=NAGA PE=1 SV=2	sp|P17050|NAGAB_HUMAN	0.0090785	1.8453	sp|P17050|NAGAB_HUMAN	1	2	7.1	46.564	411	26239000	6	1543400	0	1	0	0	1	0	0	1	1
HSPA6	P17066	HSP76_HUMAN	+	cellpart			+	+	+	+	+																	Heat shock 70 kDa protein 6 OS=Homo sapiens OX=9606 GN=HSPA6 PE=1 SV=2;Putative heat shock 70 kDa protein 7 OS=Homo sapiens OX=9606 GN=HSPA7 PE=5 SV=2	sp|P17066|HSP76_HUMAN;sp|P48741|HSP77_HUMAN	0.00062814	9.4489	sp|P17066|HSP76_HUMAN;sp|P48741|HSP77_HUMAN	2	3	18	71.027	643	28159000000	321	761070000	1	1	12	12	11	11	24	22	46
GOT1	P17174-2	AATC_HUMAN	+	cellpart			+		+		+																	Isoform 2 of Aspartate aminotransferase, cytoplasmic OS=Homo sapiens OX=9606 GN=GOT1;Aspartate aminotransferase, cytoplasmic OS=Homo sapiens OX=9606 GN=GOT1 PE=1 SV=3	sp|P17174-2|AATC_HUMAN;sp|P17174|AATC_HUMAN	0.0012165	8.1293	sp|P17174-2|AATC_HUMAN;sp|P17174|AATC_HUMAN	2	5	30.1	44.147	392	142500000	24	6477400	0	1	0	0	1	1	0	2	2
PRKCA	P17252	KPCA_HUMAN	+	cellpart			+		+		+																	Protein kinase C alpha type OS=Homo sapiens OX=9606 GN=PRKCA PE=1 SV=4	sp|P17252|KPCA_HUMAN	0	87.696	sp|P17252|KPCA_HUMAN;sp|P05129-2|KPCG_HUMAN	2	27	56.5	76.749	672	14979000000	1081	468100000	1	1	11	9	12	12	20	24	44
NDUFB7	P17568	NDUB7_HUMAN	+	cellmembrane							+																	NADH dehydrogenase [ubiquinone] 1 beta subcomplex subunit 7 OS=Homo sapiens OX=9606 GN=NDUFB7 PE=1 SV=4	sp|P17568|NDUB7_HUMAN	0.0056391	2.2583	sp|P17568|NDUB7_HUMAN	1	2	17.5	16.402	137	103430000	9	14776000	0	1	0	0	1	1	0	2	2
PRKACA	P17612	KAPCA_HUMAN	+	cellpart			+		+		+																	cAMP-dependent protein kinase catalytic subunit alpha OS=Homo sapiens OX=9606 GN=PRKACA PE=1 SV=2;Isoform 2 of cAMP-dependent protein kinase catalytic subunit alpha OS=Homo sapiens OX=9606 GN=PRKACA	sp|P17612|KAPCA_HUMAN;sp|P17612-2|KAPCA_HUMAN	0	13.701	sp|P17612|KAPCA_HUMAN;sp|P17612-2|KAPCA_HUMAN	2	3	37.9	40.589	351	1024700000	130	56929000	1	1	0	2	10	11	2	21	23
CAPN2	P17655	CAN2_HUMAN	+	cellpart		focal adhesion	+		+		+																	Calpain-2 catalytic subunit OS=Homo sapiens OX=9606 GN=CAPN2 PE=1 SV=6	sp|P17655|CAN2_HUMAN	0	13.825	sp|P17655|CAN2_HUMAN	1	8	25.7	79.994	700	145820000	26	4418700	0	1	0	0	2	2	0	4	4
DES	P17661	DESM_HUMAN	+	cellpart			+		+																			Desmin OS=Homo sapiens OX=9606 GN=DES PE=1 SV=3	sp|P17661|DESM_HUMAN	0.00066934	12.187	sp|P17661|DESM_HUMAN	1	2	12.1	53.535	470	144610000	4	4664900	0	0	0	0	0	0	0	0	0
CTPS1	P17812	PYRG1_HUMAN	+	cellpart							+																	CTP synthase 1 OS=Homo sapiens OX=9606 GN=CTPS1 PE=1 SV=2;Isoform 2 of CTP synthase 1 OS=Homo sapiens OX=9606 GN=CTPS1	sp|P17812|PYRG1_HUMAN;sp|P17812-2|PYRG1_HUMAN	0.0019231	2.5989	sp|P17812|PYRG1_HUMAN;sp|P17812-2|PYRG1_HUMAN	2	4	12.9	66.69	591	112680000	11	4024400	1	1	1	1	2	1	2	3	5
PFKL	P17858	PFKAL_HUMAN	+	cellpart			+		+																			ATP-dependent 6-phosphofructokinase, liver type OS=Homo sapiens OX=9606 GN=PFKL PE=1 SV=6;Isoform 2 of ATP-dependent 6-phosphofructokinase, liver type OS=Homo sapiens OX=9606 GN=PFKL	sp|P17858|PFKAL_HUMAN;sp|P17858-2|PFKAL_HUMAN	0	122.05	sp|P17858|PFKAL_HUMAN;sp|P17858-2|PFKAL_HUMAN	2	20	46.5	85.018	780	8672300000	846	247780000	1	1	9	10	12	12	19	24	43
LGALS3	P17931	LEG3_HUMAN	+	cellsurface			+		+		+																	Galectin-3 OS=Homo sapiens OX=9606 GN=LGALS3 PE=1 SV=5	sp|P17931|LEG3_HUMAN	0.0016349	5.1504	sp|P17931|LEG3_HUMAN	1	2	11.6	26.152	250	89031000	4	9892300	0	0	0	0	0	0	0	0	0
PSMC3	P17980	PRS6A_HUMAN	+	cellpart							+																	26S proteasome regulatory subunit 6A OS=Homo sapiens OX=9606 GN=PSMC3 PE=1 SV=3	sp|P17980|PRS6A_HUMAN	0	44.298	sp|P17980|PRS6A_HUMAN	1	11	39.6	49.203	439	1229400000	299	47284000	1	1	4	5	11	11	9	22	31
TCP1	P17987	TCPA_HUMAN	+	cellpart			+		+		+																	T-complex protein 1 subunit alpha OS=Homo sapiens OX=9606 GN=TCP1 PE=1 SV=1	sp|P17987|TCPA_HUMAN	0	226.57	sp|P17987|TCPA_HUMAN	1	31	71.9	60.343	556	16597000000	1796	535370000	1	1	10	12	12	12	22	24	46
PTPN1	P18031	PTN1_HUMAN	+	cellmembrane							+																	Tyrosine-protein phosphatase non-receptor type 1 OS=Homo sapiens OX=9606 GN=PTPN1 PE=1 SV=1	sp|P18031|PTN1_HUMAN	0.001634	5.0954	sp|P18031|PTN1_HUMAN	1	7	28.3	49.966	435	548430000	80	20312000	1	1	0	1	10	10	1	20	21
ALOX12	P18054	LOX12_HUMAN	+	cellpart			+		+		+																	Arachidonate 12-lipoxygenase, 12S-type OS=Homo sapiens OX=9606 GN=ALOX12 PE=1 SV=4	sp|P18054|LOX12_HUMAN	0	323.31	sp|P18054|LOX12_HUMAN	1	45	71.6	75.693	663	54837000000	3095	1443100000	1	1	10	12	12	12	22	24	46
IGFBP2	P18065	IBP2_HUMAN	+	cellsurface			+		+		+																	Insulin-like growth factor-binding protein 2 OS=Homo sapiens OX=9606 GN=IGFBP2 PE=1 SV=2	sp|P18065|IBP2_HUMAN	0	46.811	sp|P18065|IBP2_HUMAN	1	14	58.2	34.814	325	4417600000	522	294500000	1	1	7	7	6	7	14	13	27
ITGB5	P18084	ITB5_HUMAN	+	cellmembrane		focal adhesion	+		+		+																	Integrin beta-5 OS=Homo sapiens OX=9606 GN=ITGB5 PE=1 SV=1	sp|P18084|ITB5_HUMAN	0	131.93	sp|P18084|ITB5_HUMAN	1	25	51.9	88.053	799	4438200000	794	100870000	1	1	6	6	12	11	12	23	35
ARF4	P18085	ARF4_HUMAN	+	cellmembrane			+		+		+																	ADP-ribosylation factor 4 OS=Homo sapiens OX=9606 GN=ARF4 PE=1 SV=3	sp|P18085|ARF4_HUMAN	0	23.404	sp|P18085|ARF4_HUMAN	1	5	73.9	20.511	180	674330000	79	61303000	1	1	0	1	8	7	1	15	16
VCL	P18206-2	VINC_HUMAN	+	cellmembrane		Cell junction	+		+		+																	Isoform 1 of Vinculin OS=Homo sapiens OX=9606 GN=VCL;Vinculin OS=Homo sapiens OX=9606 GN=VCL PE=1 SV=4	sp|P18206-2|VINC_HUMAN;sp|P18206|VINC_HUMAN	0	323.31	sp|P18206-2|VINC_HUMAN;sp|P18206|VINC_HUMAN;sp|P18206-3|VINC_HUMAN	3	152	92	116.72	1066	2162800000000	26689	29227000000	1	1	12	12	12	12	24	24	48
LBP	P18428	LBP_HUMAN	+	cellsurface			+		+		+																	Lipopolysaccharide-binding protein OS=Homo sapiens OX=9606 GN=LBP PE=1 SV=3	sp|P18428|LBP_HUMAN	0	323.31	sp|P18428|LBP_HUMAN	1	30	51.8	53.383	481	81348000000	4643	5810600000	1	1	12	12	12	12	24	24	48
PTPRA	P18433-6	PTPRA_HUMAN	+	cellmembrane			+		+		+																	Isoform 2 of Receptor-type tyrosine-protein phosphatase alpha OS=Homo sapiens OX=9606 GN=PTPRA;Receptor-type tyrosine-protein phosphatase alpha OS=Homo sapiens OX=9606 GN=PTPRA PE=1 SV=3	sp|P18433-6|PTPRA_HUMAN;sp|P18433|PTPRA_HUMAN	0	32.191	sp|P18433-6|PTPRA_HUMAN;sp|P18433|PTPRA_HUMAN	2	11	23.3	89.702	793	1457300000	249	41638000	1	1	2	3	10	12	5	22	27
PGAM1	P18669	PGAM1_HUMAN	+	cellpart			+		+		+																	Phosphoglycerate mutase 1 OS=Homo sapiens OX=9606 GN=PGAM1 PE=1 SV=2	sp|P18669|PGAM1_HUMAN	0	196.3	sp|P18669|PGAM1_HUMAN;sp|Q8N0Y7|PGAM4_HUMAN;sp|P15259|PGAM2_HUMAN	3	21	74.4	28.804	254	22269000000	1575	1713000000	1	1	12	12	12	12	24	24	48
ATP5PF	P18859-2	ATP5J_HUMAN	+	cellpart							+																	Isoform 2 of ATP synthase-coupling factor 6, mitochondrial OS=Homo sapiens OX=9606 GN=ATP5PF;ATP synthase-coupling factor 6, mitochondrial OS=Homo sapiens OX=9606 GN=ATP5PF PE=1 SV=1	sp|P18859-2|ATP5J_HUMAN;sp|P18859|ATP5J_HUMAN	0	323.31	sp|P18859-2|ATP5J_HUMAN;sp|P18859|ATP5J_HUMAN	2	12	65.5	13.388	116	44190000000	1300	6312900000	1	1	12	12	12	12	24	24	48
KRT4	P19013	K2C4_HUMAN	+	cellpart																							+	Keratin, type II cytoskeletal 4 OS=Homo sapiens OX=9606 GN=KRT4 PE=1 SV=4;	sp|P19013|K2C4_HUMAN;CON__sp|P19013|K2C4_HUMAN	0	67.221	sp|P19013|K2C4_HUMAN;CON__sp|P19013|K2C4_HUMAN	2	18	40.6	57.285	534	551950000	39	20442000	1	0	2	3	0	0	5	0	5
GNAZ	P19086	GNAZ_HUMAN	+	cellmembrane							+																	Guanine nucleotide-binding protein G(z) subunit alpha OS=Homo sapiens OX=9606 GN=GNAZ PE=1 SV=3	sp|P19086|GNAZ_HUMAN	0	187.48	sp|P19086|GNAZ_HUMAN	1	19	58.6	40.923	355	20912000000	1366	1230100000	1	1	11	12	12	11	23	23	46
MYL12A	P19105	ML12A_HUMAN	+	cellpart			+		+		+																	Myosin regulatory light chain 12A OS=Homo sapiens OX=9606 GN=MYL12A PE=1 SV=2	sp|P19105|ML12A_HUMAN	0	323.31	sp|P19105|ML12A_HUMAN	1	22	84.2	19.794	171	514950000000	6299	57217000000	1	1	12	12	12	12	24	24	48
HK1	P19367	HXK1_HUMAN	+	cellmembrane							+																	Hexokinase-1 OS=Homo sapiens OX=9606 GN=HK1 PE=1 SV=3;Isoform 4 of Hexokinase-1 OS=Homo sapiens OX=9606 GN=HK1;Isoform 2 of Hexokinase-1 OS=Homo sapiens OX=9606 GN=HK1	sp|P19367|HXK1_HUMAN;sp|P19367-4|HXK1_HUMAN;sp|P19367-2|HXK1_HUMAN	0	323.31	sp|P19367|HXK1_HUMAN;sp|P19367-4|HXK1_HUMAN;sp|P19367-2|HXK1_HUMAN;sp|P52790|HXK3_HUMAN;sp|Q2TB90-3|HKDC1_HUMAN	5	81	75.1	102.48	917	138830000000	7186	2892400000	1	1	10	12	12	12	22	24	46
NDUFV2	P19404	NDUV2_HUMAN	+	cellpart							+																	NADH dehydrogenase [ubiquinone] flavoprotein 2, mitochondrial OS=Homo sapiens OX=9606 GN=NDUFV2 PE=1 SV=2	sp|P19404|NDUV2_HUMAN	0	62.442	sp|P19404|NDUV2_HUMAN	1	10	42.6	27.391	249	2955800000	207	184740000	1	1	8	6	11	11	14	22	36
SLC9A1	P19634	SL9A1_HUMAN	+	cellmembrane		focal adhesion	+		+		+																	Sodium/hydrogen exchanger 1 OS=Homo sapiens OX=9606 GN=SLC9A1 PE=1 SV=2	sp|P19634|SL9A1_HUMAN	0	18.14	sp|P19634|SL9A1_HUMAN	1	6	16.1	90.762	815	264670000	26	12603000	0	1	0	0	5	4	0	9	9
ORM2	P19652	A1AG2_HUMAN	+	serum/plasma	other		+	+	+	+																		Alpha-1-acid glycoprotein 2 OS=Homo sapiens OX=9606 GN=ORM2 PE=1 SV=2	sp|P19652|A1AG2_HUMAN	0	298.74	sp|P19652|A1AG2_HUMAN	1	14	54.2	23.602	201	79634000000	1686	7963400000	1	1	12	12	12	12	24	24	48
CSNK2A2	P19784	CSK22_HUMAN	+	cellpart							+																	Casein kinase II subunit alpha OS=Homo sapiens OX=9606 GN=CSNK2A2 PE=1 SV=1	sp|P19784|CSK22_HUMAN	0.0019286	2.6472	sp|P19784|CSK22_HUMAN	1	3	8.9	41.213	350	34678000	21	1825200	0	1	0	0	3	4	0	7	7
ITIH2	P19823	ITIH2_HUMAN	+	serum/plasma	other		+	+	+	+	+																	Inter-alpha-trypsin inhibitor heavy chain H2 OS=Homo sapiens OX=9606 GN=ITIH2 PE=1 SV=2	sp|P19823|ITIH2_HUMAN	0	323.31	sp|P19823|ITIH2_HUMAN	1	47	53.9	106.46	946	211520000000	7868	4500400000	1	1	12	12	12	12	24	24	48
ITIH1	P19827	ITIH1_HUMAN	+	serum/plasma	other		+	+	+	+	+																	Inter-alpha-trypsin inhibitor heavy chain H1 OS=Homo sapiens OX=9606 GN=ITIH1 PE=1 SV=3;Isoform 2 of Inter-alpha-trypsin inhibitor heavy chain H1 OS=Homo sapiens OX=9606 GN=ITIH1;Isoform 3 of Inter-alpha-trypsin inhibitor heavy chain H1 OS=Homo sapiens OX=	sp|P19827|ITIH1_HUMAN;sp|P19827-2|ITIH1_HUMAN;sp|P19827-3|ITIH1_HUMAN	0	323.31	sp|P19827|ITIH1_HUMAN;sp|P19827-2|ITIH1_HUMAN;sp|P19827-3|ITIH1_HUMAN	3	46	59.7	101.39	911	170270000000	9618	5159600000	1	1	12	12	12	12	24	24	48
TYMP	P19971	TYPH_HUMAN	+	cellpart							+																	Thymidine phosphorylase OS=Homo sapiens OX=9606 GN=TYMP PE=1 SV=2;Isoform 2 of Thymidine phosphorylase OS=Homo sapiens OX=9606 GN=TYMP	sp|P19971|TYPH_HUMAN;sp|P19971-2|TYPH_HUMAN	0	107.5	sp|P19971|TYPH_HUMAN;sp|P19971-2|TYPH_HUMAN	2	24	82.2	49.955	482	8094000000	987	337250000	1	1	10	11	12	12	21	24	45
EIF2S2	P20042	IF2B_HUMAN	+	cellpart							+																	Eukaryotic translation initiation factor 2 subunit 2 OS=Homo sapiens OX=9606 GN=EIF2S2 PE=1 SV=2	sp|P20042|IF2B_HUMAN	0.0015856	4.4281	sp|P20042|IF2B_HUMAN	1	7	19.5	38.388	333	384780000	15	18323000	0	1	0	0	2	4	0	6	6
TCN1	P20061	TCO1_HUMAN	+	cellsurface																								Transcobalamin-1 OS=Homo sapiens OX=9606 GN=TCN1 PE=1 SV=2	sp|P20061|TCO1_HUMAN	0	23.795	sp|P20061|TCO1_HUMAN	1	2	9.7	48.206	433	13755000	4	916990	0	0	0	0	0	0	0	0	0
ANXA7	P20073-2	ANXA7_HUMAN	+	cellsurface			+		+		+																	Isoform 2 of Annexin A7 OS=Homo sapiens OX=9606 GN=ANXA7;Annexin A7 OS=Homo sapiens OX=9606 GN=ANXA7 PE=1 SV=3	sp|P20073-2|ANXA7_HUMAN;sp|P20073|ANXA7_HUMAN	0	230.08	sp|P20073-2|ANXA7_HUMAN;sp|P20073|ANXA7_HUMAN	2	9	29.2	50.315	466	6183500000	552	325450000	1	1	9	10	12	12	19	24	43
AZU1	P20160	CAP7_HUMAN	+	cellmembrane			+		+																			Azurocidin OS=Homo sapiens OX=9606 GN=AZU1 PE=1 SV=3	sp|P20160|CAP7_HUMAN	0	25.245	sp|P20160|CAP7_HUMAN	1	8	51.4	26.885	251	1378700000	93	125340000	1	1	2	1	2	2	3	4	7
RAB4A	P20338	RAB4A_HUMAN	+	cellmembrane			+		+		+																	Ras-related protein Rab-4A OS=Homo sapiens OX=9606 GN=RAB4A PE=1 SV=3	sp|P20338|RAB4A_HUMAN	0	100.31	sp|P20338|RAB4A_HUMAN	1	10	67.4	24.389	218	2168100000	297	154870000	1	1	5	3	11	12	8	23	31
RAB5A	P20339-2	RAB5A_HUMAN	+	cellmembrane		Endosome	+		+		+																	Isoform 2 of Ras-related protein Rab-5A OS=Homo sapiens OX=9606 GN=RAB5A;Ras-related protein Rab-5A OS=Homo sapiens OX=9606 GN=RAB5A PE=1 SV=2	sp|P20339-2|RAB5A_HUMAN;sp|P20339|RAB5A_HUMAN	0	25.992	sp|P20339-2|RAB5A_HUMAN;sp|P20339|RAB5A_HUMAN	2	8	70.6	22.178	201	2111200000	223	191930000	1	1	6	6	11	11	12	22	34
RAB6A	P20340-2	RAB6A_HUMAN	+	cellmembrane		Endosome	+		+		+																	Isoform 2 of Ras-related protein Rab-6A OS=Homo sapiens OX=9606 GN=RAB6A;Isoform 4 of Ras-related protein Rab-6A OS=Homo sapiens OX=9606 GN=RAB6A	sp|P20340-2|RAB6A_HUMAN;sp|P20340-4|RAB6A_HUMAN	0	88.746	sp|P20340-2|RAB6A_HUMAN;sp|P20340-4|RAB6A_HUMAN	2	9	68.3	23.548	208	7225300000	526	555790000	1	1	9	10	11	11	19	22	41
PSMB1	P20618	PSB1_HUMAN	+	cellpart			+		+		+																	Proteasome subunit beta type-1 OS=Homo sapiens OX=9606 GN=PSMB1 PE=1 SV=2	sp|P20618|PSB1_HUMAN	0	30.896	sp|P20618|PSB1_HUMAN	1	10	63.9	26.489	241	1820100000	203	130010000	1	1	3	3	12	11	6	23	29
M6PR	P20645	MPRD_HUMAN	+	cellmembrane		Endosome					+																	Cation-dependent mannose-6-phosphate receptor OS=Homo sapiens OX=9606 GN=M6PR PE=1 SV=1	sp|P20645|MPRD_HUMAN	0	269.14	sp|P20645|MPRD_HUMAN	1	9	36.8	30.993	277	11837000000	623	789130000	1	1	9	9	12	12	18	24	42
COX5A	P20674	COX5A_HUMAN	+	cellpart							+																	Cytochrome c oxidase subunit 5A, mitochondrial OS=Homo sapiens OX=9606 GN=COX5A PE=1 SV=2	sp|P20674|COX5A_HUMAN	0	67.456	sp|P20674|COX5A_HUMAN	1	10	56.7	16.762	150	29097000000	1232	2909700000	1	1	11	12	12	12	23	24	47
PZP	P20742	PZP_HUMAN	+	serum/plasma	other		+	+	+	+	+																	Pregnancy zone protein OS=Homo sapiens OX=9606 GN=PZP PE=1 SV=4;Isoform 2 of Pregnancy zone protein OS=Homo sapiens OX=9606 GN=PZP	sp|P20742|PZP_HUMAN;sp|P20742-2|PZP_HUMAN	0	26.638	sp|P20742|PZP_HUMAN;sp|P20742-2|PZP_HUMAN	2	10	18.5	163.86	1482	322030000	55	5649600	1	1	1	1	1	2	2	3	5
C4BPB	P20851-2	C4BPB_HUMAN	+	serum/plasma	compl																							Isoform 2 of C4b-binding protein beta chain OS=Homo sapiens OX=9606 GN=C4BPB;C4b-binding protein beta chain OS=Homo sapiens OX=9606 GN=C4BPB PE=1 SV=1	sp|P20851-2|C4BPB_HUMAN;sp|P20851|C4BPB_HUMAN	0	70.848	sp|P20851-2|C4BPB_HUMAN;sp|P20851|C4BPB_HUMAN	2	10	47	28.286	251	13392000000	1407	956560000	1	1	12	12	12	12	24	24	48
FLG	P20930	FILA_HUMAN	+	cellsurface																							+	Filaggrin OS=Homo sapiens OX=9606 GN=FLG PE=1 SV=3;	sp|P20930|FILA_HUMAN;CON__sp|P20930|FILA_HUMAN	0	59.231	sp|P20930|FILA_HUMAN;CON__sp|P20930|FILA_HUMAN	2	13	5.2	435.16	4061	390020000	23	1848500	0	0	0	0	0	0	0	0	0
RASA1	P20936-2	RASA1_HUMAN	+	cellpart							+																	Isoform 2 of Ras GTPase-activating protein 1 OS=Homo sapiens OX=9606 GN=RASA1;Isoform 4 of Ras GTPase-activating protein 1 OS=Homo sapiens OX=9606 GN=RASA1;Ras GTPase-activating protein 1 OS=Homo sapiens OX=9606 GN=RASA1 PE=1 SV=1	sp|P20936-2|RASA1_HUMAN;sp|P20936-4|RASA1_HUMAN;sp|P20936|RASA1_HUMAN	0	17.451	sp|P20936-2|RASA1_HUMAN;sp|P20936-4|RASA1_HUMAN;sp|P20936|RASA1_HUMAN	3	7	15.6	100.4	870	355560000	52	7407400	0	1	0	0	4	7	0	11	11
GSTM3	P21266	GSTM3_HUMAN	+	cellpart			+		+		+																	Glutathione S-transferase Mu 3 OS=Homo sapiens OX=9606 GN=GSTM3 PE=1 SV=3	sp|P21266|GSTM3_HUMAN	0.0017172	6.2689	sp|P21266|GSTM3_HUMAN	1	6	33.8	26.559	225	294000000	34	17294000	1	1	3	2	1	2	5	3	8
ATP6V1B2	P21281	VATB2_HUMAN	+	cellmembrane			+		+		+																	V-type proton ATPase subunit B, brain isoform OS=Homo sapiens OX=9606 GN=ATP6V1B2 PE=1 SV=3	sp|P21281|VATB2_HUMAN	0	72.576	sp|P21281|VATB2_HUMAN	1	22	63	56.5	511	5313900000	791	212560000	1	1	7	7	12	12	14	24	38
ATP6V1C1	P21283	VATC1_HUMAN	+	cellmembrane			+		+		+																	V-type proton ATPase subunit C 1 OS=Homo sapiens OX=9606 GN=ATP6V1C1 PE=1 SV=4	sp|P21283|VATC1_HUMAN	0.0017045	6.1684	sp|P21283|VATC1_HUMAN	1	4	15.7	43.941	382	82843000	34	3068300	1	1	1	1	3	3	2	6	8
CSRP1	P21291	CSRP1_HUMAN	+	cellpart		focal adhesion	+		+		+																	Cysteine and glycine-rich protein 1 OS=Homo sapiens OX=9606 GN=CSRP1 PE=1 SV=3	sp|P21291|CSRP1_HUMAN	0	323.31	sp|P21291|CSRP1_HUMAN	1	17	74.1	20.567	193	42643000000	1333	3876600000	1	1	9	11	12	12	20	24	44
FLNA	P21333	FLNA_HUMAN	+	cellpart		Cell junction	+		+		+																	Filamin-A OS=Homo sapiens OX=9606 GN=FLNA PE=1 SV=4	sp|P21333|FLNA_HUMAN	0	323.31	sp|P21333|FLNA_HUMAN	1	335	92.4	280.74	2647	10697000000000	92175	82922000000	1	1	12	12	12	12	24	24	48
ACO1	P21399	ACOC_HUMAN	+	cellpart			+		+		+																	Cytoplasmic aconitate hydratase OS=Homo sapiens OX=9606 GN=ACO1 PE=1 SV=3	sp|P21399|ACOC_HUMAN	0.00064309	10.198	sp|P21399|ACOC_HUMAN	1	10	21.3	98.398	889	437620000	82	10419000	1	1	4	2	5	7	6	12	18
VDAC1	P21796	VDAC1_HUMAN	+	cellmembrane			+		+		+																	Voltage-dependent anion-selective channel protein 1 OS=Homo sapiens OX=9606 GN=VDAC1 PE=1 SV=2	sp|P21796|VDAC1_HUMAN	0	323.31	sp|P21796|VDAC1_HUMAN	1	21	86.2	30.772	283	16700000000	1489	982340000	1	1	11	12	11	11	23	22	45
SDHB	P21912	SDHB_HUMAN	+	cellmembrane																								Succinate dehydrogenase [ubiquinone] iron-sulfur subunit, mitochondrial OS=Homo sapiens OX=9606 GN=SDHB PE=1 SV=3	sp|P21912|SDHB_HUMAN	0	67.32	sp|P21912|SDHB_HUMAN	1	14	66.8	31.629	280	3668700000	359	203820000	1	1	3	3	11	11	6	22	28
COMT	P21964-2	COMT_HUMAN	+	cellmembrane			+		+		+																	Isoform Soluble of Catechol O-methyltransferase OS=Homo sapiens OX=9606 GN=COMT;Catechol O-methyltransferase OS=Homo sapiens OX=9606 GN=COMT PE=1 SV=2	sp|P21964-2|COMT_HUMAN;sp|P21964|COMT_HUMAN	0	146.47	sp|P21964-2|COMT_HUMAN;sp|P21964|COMT_HUMAN	2	16	81.9	24.449	221	13829000000	1115	1063700000	1	1	6	6	12	12	12	24	36
OSBP	P22059	OSBP1_HUMAN	+	cellpart		Cell junction					+																	Oxysterol-binding protein 1 OS=Homo sapiens OX=9606 GN=OSBP PE=1 SV=1	sp|P22059|OSBP1_HUMAN	0.0019333	2.6602	sp|P22059|OSBP1_HUMAN	1	3	8.1	89.42	807	61597000	22	1502400	0	1	0	0	5	5	0	10	10
PCMT1	P22061	PIMT_HUMAN	+	cellpart			+		+		+																	Protein-L-isoaspartate(D-aspartate) O-methyltransferase OS=Homo sapiens OX=9606 GN=PCMT1 PE=1 SV=4;Isoform 2 of Protein-L-isoaspartate(D-aspartate) O-methyltransferase OS=Homo sapiens OX=9606 GN=PCMT1	sp|P22061|PIMT_HUMAN;sp|P22061-2|PIMT_HUMAN	0	154.96	sp|P22061|PIMT_HUMAN;sp|P22061-2|PIMT_HUMAN	2	15	88.1	24.636	227	17908000000	1033	1628000000	1	1	7	8	12	12	15	24	39
GART	P22102	PUR2_HUMAN	+	cellpart			+		+		+																	Trifunctional purine biosynthetic protein adenosine-3 OS=Homo sapiens OX=9606 GN=GART PE=1 SV=1;Isoform Short of Trifunctional purine biosynthetic protein adenosine-3 OS=Homo sapiens OX=9606 GN=GART	sp|P22102|PUR2_HUMAN;sp|P22102-2|PUR2_HUMAN	0.001594	4.4708	sp|P22102|PUR2_HUMAN;sp|P22102-2|PUR2_HUMAN	2	8	13.9	107.77	1010	237050000	41	4938600	0	1	0	0	5	6	0	11	11
PAICS	P22234	PUR6_HUMAN	+	cellpart			+		+		+																	Multifunctional protein ADE2 OS=Homo sapiens OX=9606 GN=PAICS PE=1 SV=3;Isoform 2 of Multifunctional protein ADE2 OS=Homo sapiens OX=9606 GN=PAICS	sp|P22234|PUR6_HUMAN;sp|P22234-2|PUR6_HUMAN	0	51.139	sp|P22234|PUR6_HUMAN;sp|P22234-2|PUR6_HUMAN	2	16	57.4	47.079	425	2588200000	431	136220000	1	1	8	8	12	12	16	24	40
SCP2	P22307-6	NLTP_HUMAN	+	cellpart							+																	Isoform 6 of Non-specific lipid-transfer protein OS=Homo sapiens OX=9606 GN=SCP2;Isoform SCP2 of Non-specific lipid-transfer protein OS=Homo sapiens OX=9606 GN=SCP2;Isoform 4 of Non-specific lipid-transfer protein OS=Homo sapiens OX=9606 GN=SCP2;Isoform 7	sp|P22307-6|NLTP_HUMAN;sp|P22307-2|NLTP_HUMAN;sp|P22307-4|NLTP_HUMAN;sp|P22307-7|NLTP_HUMAN;sp|P22307-8|NLTP_HUMAN;sp|P22307|NLTP_HUMAN	0	46.837	sp|P22307-6|NLTP_HUMAN;sp|P22307-2|NLTP_HUMAN;sp|P22307-4|NLTP_HUMAN;sp|P22307-7|NLTP_HUMAN;sp|P22307-8|NLTP_HUMAN;sp|P22307|NLTP_HUMAN;sp|P22307-5|NLTP_HUMAN	7	10	70.7	15.079	140	4518800000	320	451880000	1	1	2	3	12	11	5	23	28
UBA1	P22314-2	UBA1_HUMAN	+	cellpart			+		+		+																	Isoform 2 of Ubiquitin-like modifier-activating enzyme 1 OS=Homo sapiens OX=9606 GN=UBA1;Ubiquitin-like modifier-activating enzyme 1 OS=Homo sapiens OX=9606 GN=UBA1 PE=1 SV=3	sp|P22314-2|UBA1_HUMAN;sp|P22314|UBA1_HUMAN	0	323.31	sp|P22314-2|UBA1_HUMAN;sp|P22314|UBA1_HUMAN	2	41	66.1	113.8	1018	19209000000	2034	369410000	1	1	10	11	12	12	21	24	45
NME2	P22392-2	NDKB_HUMAN	+	cellpart			+		+		+																	Isoform 3 of Nucleoside diphosphate kinase B OS=Homo sapiens OX=9606 GN=NME2;Nucleoside diphosphate kinase B OS=Homo sapiens OX=9606 GN=NME2 PE=1 SV=1	sp|P22392-2|NDKB_HUMAN;sp|P22392|NDKB_HUMAN	0	76.431	sp|P22392-2|NDKB_HUMAN;sp|P22392|NDKB_HUMAN;sp|O60361|NDK8_HUMAN	3	22	82.8	30.137	267	48877000000	1481	2443800000	1	1	12	12	12	12	24	24	48
FDXR	P22570-5	ADRO_HUMAN	+	cellmembrane							+																	Isoform 5 of NADPH:adrenodoxin oxidoreductase, mitochondrial OS=Homo sapiens OX=9606 GN=FDXR;Isoform 6 of NADPH:adrenodoxin oxidoreductase, mitochondrial OS=Homo sapiens OX=9606 GN=FDXR;NADPH:adrenodoxin oxidoreductase, mitochondrial OS=Homo sapiens OX=960	sp|P22570-5|ADRO_HUMAN;sp|P22570-6|ADRO_HUMAN;sp|P22570|ADRO_HUMAN;sp|P22570-7|ADRO_HUMAN;sp|P22570-3|ADRO_HUMAN;sp|P22570-4|ADRO_HUMAN;sp|P22570-2|ADRO_HUMAN	0.0033397	2.4533	sp|P22570-5|ADRO_HUMAN;sp|P22570-6|ADRO_HUMAN;sp|P22570|ADRO_HUMAN;sp|P22570-7|ADRO_HUMAN;sp|P22570-3|ADRO_HUMAN;sp|P22570-4|ADRO_HUMAN;sp|P22570-2|ADRO_HUMAN	7	6	23	52.918	483	116380000	19	4012900	0	1	0	0	1	1	0	2	2
PRKACG	P22612	KAPCG_HUMAN	+	cellpart																								cAMP-dependent protein kinase catalytic subunit gamma OS=Homo sapiens OX=9606 GN=PRKACG PE=1 SV=3	sp|P22612|KAPCG_HUMAN	0.0015748	4.2409	sp|P22612|KAPCG_HUMAN	1	2	17.1	40.434	351	173620000	12	10851000	1	1	1	1	3	3	2	6	8
HNRNPA2B1	P22626-2	ROA2_HUMAN	+	cellpart			+		+		+																	Isoform A2 of Heterogeneous nuclear ribonucleoproteins A2/B1 OS=Homo sapiens OX=9606 GN=HNRNPA2B1;Heterogeneous nuclear ribonucleoproteins A2/B1 OS=Homo sapiens OX=9606 GN=HNRNPA2B1 PE=1 SV=2	sp|P22626-2|ROA2_HUMAN;sp|P22626|ROA2_HUMAN	0.00065617	11.099	sp|P22626-2|ROA2_HUMAN;sp|P22626|ROA2_HUMAN	2	4	16.7	36.006	341	53546000	5	2974800	0	0	0	0	0	0	0	0	0
CBL	P22681	CBL_HUMAN	+	cellpart		focal adhesion					+																	E3 ubiquitin-protein ligase CBL OS=Homo sapiens OX=9606 GN=CBL PE=1 SV=2	sp|P22681|CBL_HUMAN	0.0082117	1.9088	sp|P22681|CBL_HUMAN	1	3	6.4	99.632	906	517000000	3	13256000	0	0	0	0	0	0	0	0	0
IGFBP4	P22692-2	IBP4_HUMAN	+	cellsurface																								Isoform 2 of Insulin-like growth factor-binding protein 4 OS=Homo sapiens OX=9606 GN=IGFBP4;Insulin-like growth factor-binding protein 4 OS=Homo sapiens OX=9606 GN=IGFBP4 PE=1 SV=2	sp|P22692-2|IBP4_HUMAN;sp|P22692|IBP4_HUMAN	0.0017026	6.1313	sp|P22692-2|IBP4_HUMAN;sp|P22692|IBP4_HUMAN	2	2	26.6	17.635	158	50915000	13	5657200	1	1	0	1	3	2	1	5	6
PRKACB	P22694-2	KAPCB_HUMAN	+	cellpart			+		+		+																	Isoform 2 of cAMP-dependent protein kinase catalytic subunit beta OS=Homo sapiens OX=9606 GN=PRKACB;Isoform 3 of cAMP-dependent protein kinase catalytic subunit beta OS=Homo sapiens OX=9606 GN=PRKACB;cAMP-dependent protein kinase catalytic subunit beta OS=	sp|P22694-2|KAPCB_HUMAN;sp|P22694-3|KAPCB_HUMAN;sp|P22694|KAPCB_HUMAN;sp|P22694-5|KAPCB_HUMAN;sp|P22694-7|KAPCB_HUMAN;sp|P22694-6|KAPCB_HUMAN;sp|P22694-9|KAPCB_HUMAN;sp|P22694-10|KAPCB_HUMAN;sp|P22694-8|KAPCB_HUMAN	0	141.19	sp|P22694-2|KAPCB_HUMAN;sp|P22694-3|KAPCB_HUMAN;sp|P22694|KAPCB_HUMAN;sp|P22694-5|KAPCB_HUMAN;sp|P22694-7|KAPCB_HUMAN;sp|P22694-6|KAPCB_HUMAN;sp|P22694-9|KAPCB_HUMAN;sp|P22694-10|KAPCB_HUMAN;sp|P22694-8|KAPCB_HUMAN	9	19	53.3	46.235	398	6758400000	833	337920000	1	1	6	6	12	12	12	24	36
UQCRC2	P22695	QCR2_HUMAN	+	cellmembrane							+																	Cytochrome b-c1 complex subunit 2, mitochondrial OS=Homo sapiens OX=9606 GN=UQCRC2 PE=1 SV=3	sp|P22695|QCR2_HUMAN	0	203.79	sp|P22695|QCR2_HUMAN	1	21	77.9	48.442	453	15467000000	1341	814070000	1	1	10	12	12	12	22	24	46
CPN2	P22792	CPN2_HUMAN	+	cellsurface			+	+	+	+	+																	Carboxypeptidase N subunit 2 OS=Homo sapiens OX=9606 GN=CPN2 PE=1 SV=3	sp|P22792|CPN2_HUMAN	0	93.083	sp|P22792|CPN2_HUMAN	1	14	49.2	60.556	545	7085500000	1028	322070000	1	1	12	12	12	12	24	24	48
FECH	P22830	HEMH_HUMAN	+	cellmembrane							+																	Ferrochelatase, mitochondrial OS=Homo sapiens OX=9606 GN=FECH PE=1 SV=2;Isoform 2 of Ferrochelatase, mitochondrial OS=Homo sapiens OX=9606 GN=FECH	sp|P22830|HEMH_HUMAN;sp|P22830-2|HEMH_HUMAN	0.0017301	6.4188	sp|P22830|HEMH_HUMAN;sp|P22830-2|HEMH_HUMAN	2	5	23.4	47.862	423	483820000	52	19353000	1	1	1	0	7	7	1	14	15
PROZ	P22891	PROZ_HUMAN	+	serum/plasma	other		+		+																			Vitamin K-dependent protein Z OS=Homo sapiens OX=9606 GN=PROZ PE=1 SV=2;Isoform 2 of Vitamin K-dependent protein Z OS=Homo sapiens OX=9606 GN=PROZ	sp|P22891|PROZ_HUMAN;sp|P22891-2|PROZ_HUMAN	0.0038113	2.4358	sp|P22891|PROZ_HUMAN;sp|P22891-2|PROZ_HUMAN	2	4	18	44.743	400	24020000	5	1264200	0	1	0	0	1	1	0	2	2
IGHV1-2	P23083	HV102_HUMAN	+	serum/plasma	IG																							Immunoglobulin heavy variable 1-2 OS=Homo sapiens OX=9606 GN=IGHV1-2 PE=1 SV=2	sp|P23083|HV102_HUMAN	0	41.589	sp|P23083|HV102_HUMAN	1	5	56.4	13.085	117	4441400000	294	634490000	1	1	12	12	11	12	24	23	47
FBLN1	P23142	FBLN1_HUMAN	+	cellsurface			+		+		+																	Fibulin-1 OS=Homo sapiens OX=9606 GN=FBLN1 PE=1 SV=4;Isoform A of Fibulin-1 OS=Homo sapiens OX=9606 GN=FBLN1;Isoform B of Fibulin-1 OS=Homo sapiens OX=9606 GN=FBLN1	sp|P23142|FBLN1_HUMAN;sp|P23142-2|FBLN1_HUMAN;sp|P23142-3|FBLN1_HUMAN	0	323.31	sp|P23142|FBLN1_HUMAN;sp|P23142-2|FBLN1_HUMAN;sp|P23142-3|FBLN1_HUMAN	3	35	53.8	77.213	703	91976000000	4496	2967000000	1	1	12	12	12	12	24	24	48
PTGS1	P23219-3	PGH1_HUMAN	+	cellmembrane			+		+		+																	Isoform 3 of Prostaglandin G/H synthase 1 OS=Homo sapiens OX=9606 GN=PTGS1;Isoform 2 of Prostaglandin G/H synthase 1 OS=Homo sapiens OX=9606 GN=PTGS1;Prostaglandin G/H synthase 1 OS=Homo sapiens OX=9606 GN=PTGS1 PE=1 SV=2;Isoform 6 of Prostaglandin G/H syn	sp|P23219-3|PGH1_HUMAN;sp|P23219-2|PGH1_HUMAN;sp|P23219|PGH1_HUMAN;sp|P23219-6|PGH1_HUMAN;sp|P23219-5|PGH1_HUMAN;sp|P23219-4|PGH1_HUMAN	0	323.31	sp|P23219-3|PGH1_HUMAN;sp|P23219-2|PGH1_HUMAN;sp|P23219|PGH1_HUMAN;sp|P23219-6|PGH1_HUMAN;sp|P23219-5|PGH1_HUMAN;sp|P23219-4|PGH1_HUMAN	6	33	71.7	61.929	537	154700000000	3737	5525100000	1	1	12	12	12	12	24	24	48
TUBG1	P23258	TBG1_HUMAN	+	cellpart							+																	Tubulin gamma-1 chain OS=Homo sapiens OX=9606 GN=TUBG1 PE=1 SV=2;Tubulin gamma-2 chain OS=Homo sapiens OX=9606 GN=TUBG2 PE=2 SV=1	sp|P23258|TBG1_HUMAN;sp|Q9NRH3|TBG2_HUMAN	0	23.778	sp|P23258|TBG1_HUMAN;sp|Q9NRH3|TBG2_HUMAN	2	7	35.7	51.169	451	376660000	35	17936000	0	1	0	0	4	6	0	10	10
PPIB	P23284	PPIB_HUMAN	+	cellpart		focal adhesion	+		+		+																	Peptidyl-prolyl cis-trans isomerase B OS=Homo sapiens OX=9606 GN=PPIB PE=1 SV=2	sp|P23284|PPIB_HUMAN	0	275.36	sp|P23284|PPIB_HUMAN	1	24	69	23.742	216	93462000000	2830	7189400000	1	1	11	11	12	12	22	24	46
ME2	P23368	MAOM_HUMAN	+	cellpart							+																	NAD-dependent malic enzyme, mitochondrial OS=Homo sapiens OX=9606 GN=ME2 PE=1 SV=1;Isoform 2 of NAD-dependent malic enzyme, mitochondrial OS=Homo sapiens OX=9606 GN=ME2	sp|P23368|MAOM_HUMAN;sp|P23368-2|MAOM_HUMAN	0	323.31	sp|P23368|MAOM_HUMAN;sp|P23368-2|MAOM_HUMAN	2	35	80	65.443	584	37202000000	3015	1328700000	1	1	10	10	12	12	20	24	44
WARS	P23381	SYWC_HUMAN	+	cellpart			+		+		+																	Tryptophan--tRNA ligase, cytoplasmic OS=Homo sapiens OX=9606 GN=WARS PE=1 SV=2;Isoform 2 of Tryptophan--tRNA ligase, cytoplasmic OS=Homo sapiens OX=9606 GN=WARS	sp|P23381|SYWC_HUMAN;sp|P23381-2|SYWC_HUMAN	0	25.154	sp|P23381|SYWC_HUMAN;sp|P23381-2|SYWC_HUMAN	2	14	49.9	53.165	471	1135600000	272	47315000	1	1	9	10	12	12	19	24	43
GCSH	P23434	GCSH_HUMAN	+	cellpart							+																	Glycine cleavage system H protein, mitochondrial OS=Homo sapiens OX=9606 GN=GCSH PE=1 SV=2	sp|P23434|GCSH_HUMAN	0	12.774	sp|P23434|GCSH_HUMAN	1	2	17.3	18.884	173	339220000	47	48460000	0	1	0	0	8	8	0	16	16
AHCY	P23526	SAHH_HUMAN	+	cellpart			+		+		+																	Adenosylhomocysteinase OS=Homo sapiens OX=9606 GN=AHCY PE=1 SV=4;Isoform 2 of Adenosylhomocysteinase OS=Homo sapiens OX=9606 GN=AHCY	sp|P23526|SAHH_HUMAN;sp|P23526-2|SAHH_HUMAN	0	23.187	sp|P23526|SAHH_HUMAN;sp|P23526-2|SAHH_HUMAN	2	4	11.8	47.716	432	984640000	79	44756000	1	1	1	1	8	9	2	17	19
CFL1	P23528	COF1_HUMAN	+	cellpart		Cell junction	+		+		+																	Cofilin-1 OS=Homo sapiens OX=9606 GN=CFL1 PE=1 SV=3	sp|P23528|COF1_HUMAN	0	323.31	sp|P23528|COF1_HUMAN;sp|Q9Y281-3|COF2_HUMAN;sp|Q9Y281|COF2_HUMAN	3	43	99.4	18.502	166	812980000000	7824	81298000000	1	1	12	12	12	12	24	24	48
EIF4B	P23588	IF4B_HUMAN	+	cellpart							+																	Eukaryotic translation initiation factor 4B OS=Homo sapiens OX=9606 GN=EIF4B PE=1 SV=2	sp|P23588|IF4B_HUMAN	0.0016484	5.3352	sp|P23588|IF4B_HUMAN;sp|P23588-2|IF4B_HUMAN	2	3	9	69.15	611	205410000	26	8216500	0	1	0	0	4	5	0	9	9
F8A1	P23610	F8I2_HUMAN	+	cellpart							+																	Factor VIII intron 22 protein OS=Homo sapiens OX=9606 GN=F8A1 PE=1 SV=2	sp|P23610|F8I2_HUMAN	0.0017554	6.8324	sp|P23610|F8I2_HUMAN	1	4	17.3	39.103	371	195910000	6	17810000	1	1	1	0	1	1	1	2	3
ATP2B4	P23634-5	AT2B4_HUMAN	+	cellmembrane							+																	Isoform ZK of Plasma membrane calcium-transporting ATPase 4 OS=Homo sapiens OX=9606 GN=ATP2B4;Isoform XK of Plasma membrane calcium-transporting ATPase 4 OS=Homo sapiens OX=9606 GN=ATP2B4;Isoform ZA of Plasma membrane calcium-transporting ATPase 4 OS=Homo	sp|P23634-5|AT2B4_HUMAN;sp|P23634-4|AT2B4_HUMAN;sp|P23634-3|AT2B4_HUMAN;sp|P23634-2|AT2B4_HUMAN;sp|P23634-7|AT2B4_HUMAN;sp|P23634-6|AT2B4_HUMAN;sp|P23634-8|AT2B4_HUMAN;sp|P23634|AT2B4_HUMAN	0.0012195	8.2535	sp|P23634-5|AT2B4_HUMAN;sp|P23634-4|AT2B4_HUMAN;sp|P23634-3|AT2B4_HUMAN;sp|P23634-2|AT2B4_HUMAN;sp|P23634-7|AT2B4_HUMAN;sp|P23634-6|AT2B4_HUMAN;sp|P23634-8|AT2B4_HUMAN;sp|P23634|AT2B4_HUMAN	8	14	18	124.01	1122	165080000	51	3001500	1	1	2	5	1	3	7	4	11
CPT2	P23786	CPT2_HUMAN	+	cellmembrane							+																	Carnitine O-palmitoyltransferase 2, mitochondrial OS=Homo sapiens OX=9606 GN=CPT2 PE=1 SV=2	sp|P23786|CPT2_HUMAN	0.00064725	10.442	sp|P23786|CPT2_HUMAN	1	15	35.6	73.776	658	530520000	102	15158000	1	1	1	1	6	8	2	14	16
PRTN3	P24158	PRTN3_HUMAN	+	cellmembrane			+		+																			Myeloblastin OS=Homo sapiens OX=9606 GN=PRTN3 PE=1 SV=3	sp|P24158|PRTN3_HUMAN	0.0016556	5.4391	sp|P24158|PRTN3_HUMAN	1	3	24.2	27.807	256	1251300000	48	178760000	1	1	1	1	1	2	2	3	5
EEF1B2	P24534	EF1B_HUMAN	+	cellpart							+																	Elongation factor 1-beta OS=Homo sapiens OX=9606 GN=EEF1B2 PE=1 SV=3	sp|P24534|EF1B_HUMAN	0	102.29	sp|P24534|EF1B_HUMAN	1	12	75.1	24.763	225	5765500000	489	480460000	1	1	5	5	12	12	10	24	34
ATP5PB	P24539	AT5F1_HUMAN	+	cellpart							+																	ATP synthase F(0) complex subunit B1, mitochondrial OS=Homo sapiens OX=9606 GN=ATP5PB PE=1 SV=2	sp|P24539|AT5F1_HUMAN	0	323.31	sp|P24539|AT5F1_HUMAN	1	13	45.7	28.908	256	7398100000	666	462380000	1	1	10	12	12	12	22	24	46
TBXAS1	P24557	THAS_HUMAN	+	cellmembrane							+																	Thromboxane-A synthase OS=Homo sapiens OX=9606 GN=TBXAS1 PE=1 SV=3;Isoform 2 of Thromboxane-A synthase OS=Homo sapiens OX=9606 GN=TBXAS1;Isoform 3 of Thromboxane-A synthase OS=Homo sapiens OX=9606 GN=TBXAS1;Isoform 4 of Thromboxane-A synthase OS=Homo sapie	sp|P24557|THAS_HUMAN;sp|P24557-2|THAS_HUMAN;sp|P24557-3|THAS_HUMAN;sp|P24557-4|THAS_HUMAN	0	323.31	sp|P24557|THAS_HUMAN;sp|P24557-2|THAS_HUMAN;sp|P24557-3|THAS_HUMAN;sp|P24557-4|THAS_HUMAN	4	45	74.3	60.518	533	134920000000	4726	5189400000	1	1	11	12	12	12	23	24	47
ACP1	P24666	PPAC_HUMAN	+	cellpart			+		+		+																	Low molecular weight phosphotyrosine protein phosphatase OS=Homo sapiens OX=9606 GN=ACP1 PE=1 SV=3;Isoform 2 of Low molecular weight phosphotyrosine protein phosphatase OS=Homo sapiens OX=9606 GN=ACP1	sp|P24666|PPAC_HUMAN;sp|P24666-2|PPAC_HUMAN	0	35.632	sp|P24666|PPAC_HUMAN;sp|P24666-2|PPAC_HUMAN;sp|P24666-4|PPAC_HUMAN	3	7	58.2	18.042	158	457690000	97	50855000	1	1	0	1	9	9	1	18	19
ACAT1	P24752	THIL_HUMAN	+	cellpart			+		+		+																	Acetyl-CoA acetyltransferase, mitochondrial OS=Homo sapiens OX=9606 GN=ACAT1 PE=1 SV=1	sp|P24752|THIL_HUMAN	0	68.164	sp|P24752|THIL_HUMAN;sp|P24752-2|THIL_HUMAN	2	14	51.1	45.199	427	1779000000	244	74126000	1	1	2	4	12	11	6	23	29
MYL9	P24844	MYL9_HUMAN	+	cellpart							+																	Myosin regulatory light polypeptide 9 OS=Homo sapiens OX=9606 GN=MYL9 PE=1 SV=4;Isoform 2 of Myosin regulatory light polypeptide 9 OS=Homo sapiens OX=9606 GN=MYL9	sp|P24844|MYL9_HUMAN;sp|P24844-2|MYL9_HUMAN	0	323.31	sp|P24844|MYL9_HUMAN;sp|P24844-2|MYL9_HUMAN	2	13	83.7	19.827	172	232090000000	2473	25788000000	1	1	12	12	12	12	24	24	48
GRK2	P25098	ARBK1_HUMAN	+	cellpart							+																	Beta-adrenergic receptor kinase 1 OS=Homo sapiens OX=9606 GN=GRK2 PE=1 SV=2	sp|P25098|ARBK1_HUMAN	0.006055	2.1476	sp|P25098|ARBK1_HUMAN	1	3	9.1	79.573	689	569660000	13	15824000	0	1	0	0	5	5	0	10	10
F2R	P25116	PAR1_HUMAN	+	cellmembrane							+																	Proteinase-activated receptor 1 OS=Homo sapiens OX=9606 GN=F2R PE=1 SV=2	sp|P25116|PAR1_HUMAN	0.0016	4.5234	sp|P25116|PAR1_HUMAN	1	2	7.8	47.44	425	34730000	6	2671500	0	1	0	0	1	1	0	2	2
AZGP1	P25311	ZA2G_HUMAN	+	serum/plasma	other		+		+		+																	Zinc-alpha-2-glycoprotein OS=Homo sapiens OX=9606 GN=AZGP1 PE=1 SV=2	sp|P25311|ZA2G_HUMAN	0	323.31	sp|P25311|ZA2G_HUMAN	1	18	51.3	34.258	298	27366000000	1854	1520300000	1	1	12	12	12	12	24	24	48
MPST	P25325	THTM_HUMAN	+	cellpart		Cell junction	+		+		+																	3-mercaptopyruvate sulfurtransferase OS=Homo sapiens OX=9606 GN=MPST PE=1 SV=3;Isoform 2 of 3-mercaptopyruvate sulfurtransferase OS=Homo sapiens OX=9606 GN=MPST	sp|P25325|THTM_HUMAN;sp|P25325-2|THTM_HUMAN	0	39.889	sp|P25325|THTM_HUMAN;sp|P25325-2|THTM_HUMAN	2	11	55.9	33.178	297	4451500000	419	317970000	1	1	6	7	11	11	13	22	35
RPS12	P25398	RS12_HUMAN	+	cellpart							+																	40S ribosomal protein S12 OS=Homo sapiens OX=9606 GN=RPS12 PE=1 SV=3	sp|P25398|RS12_HUMAN	0	23.972	sp|P25398|RS12_HUMAN	1	5	49.2	14.515	132	128160000	27	18308000	1	1	1	0	2	2	1	4	5
ATP5F1A	P25705	ATPA_HUMAN	+	cellmembrane			+		+		+																	ATP synthase subunit alpha, mitochondrial OS=Homo sapiens OX=9606 GN=ATP5F1A PE=1 SV=1;Isoform 2 of ATP synthase subunit alpha, mitochondrial OS=Homo sapiens OX=9606 GN=ATP5F1A;Isoform 3 of ATP synthase subunit alpha, mitochondrial OS=Homo sapiens OX=9606	sp|P25705|ATPA_HUMAN;sp|P25705-2|ATPA_HUMAN;sp|P25705-3|ATPA_HUMAN	0	323.31	sp|P25705|ATPA_HUMAN;sp|P25705-2|ATPA_HUMAN;sp|P25705-3|ATPA_HUMAN	3	61	85.5	59.75	553	270070000000	6452	8712100000	1	1	12	12	12	12	24	24	48
PSMA1	P25786	PSA1_HUMAN	+	cellpart			+		+		+																	Proteasome subunit alpha type-1 OS=Homo sapiens OX=9606 GN=PSMA1 PE=1 SV=1;Isoform Long of Proteasome subunit alpha type-1 OS=Homo sapiens OX=9606 GN=PSMA1	sp|P25786|PSA1_HUMAN;sp|P25786-2|PSA1_HUMAN	0	101.54	sp|P25786|PSA1_HUMAN;sp|P25786-2|PSA1_HUMAN	2	16	72.6	29.555	263	5893800000	521	327430000	1	1	7	7	12	12	14	24	38
PSMA2	P25787	PSA2_HUMAN	+	cellpart			+		+		+																	Proteasome subunit alpha type-2 OS=Homo sapiens OX=9606 GN=PSMA2 PE=1 SV=2	sp|P25787|PSA2_HUMAN	0	44.319	sp|P25787|PSA2_HUMAN	1	12	79.1	25.898	234	3191100000	566	319110000	1	1	7	7	12	12	14	24	38
PSMA3	P25788-2	PSA3_HUMAN	+	cellpart			+		+		+																	Isoform 2 of Proteasome subunit alpha type-3 OS=Homo sapiens OX=9606 GN=PSMA3;Proteasome subunit alpha type-3 OS=Homo sapiens OX=9606 GN=PSMA3 PE=1 SV=2	sp|P25788-2|PSA3_HUMAN;sp|P25788|PSA3_HUMAN	0.00123	8.6877	sp|P25788-2|PSA3_HUMAN;sp|P25788|PSA3_HUMAN	2	6	31	27.647	248	1231800000	154	102650000	1	1	4	4	11	11	8	22	30
PSMA4	P25789	PSA4_HUMAN	+	cellpart			+		+		+																	Proteasome subunit alpha type-4 OS=Homo sapiens OX=9606 GN=PSMA4 PE=1 SV=1;Isoform 2 of Proteasome subunit alpha type-4 OS=Homo sapiens OX=9606 GN=PSMA4	sp|P25789|PSA4_HUMAN;sp|P25789-2|PSA4_HUMAN	0.00065746	11.161	sp|P25789|PSA4_HUMAN;sp|P25789-2|PSA4_HUMAN	2	10	50.2	29.483	261	1011300000	113	77792000	1	1	2	2	7	9	4	16	20
MSN	P26038	MOES_HUMAN	+	cellmembrane		Endosome	+	+	+	+	+																	Moesin OS=Homo sapiens OX=9606 GN=MSN PE=1 SV=3	sp|P26038|MOES_HUMAN	0	323.31	sp|P26038|MOES_HUMAN	1	79	86	67.819	577	176810000000	9468	5200300000	1	1	12	12	12	12	24	24	48
IVD	P26440	IVD_HUMAN	+	cellpart							+																	Isovaleryl-CoA dehydrogenase, mitochondrial OS=Homo sapiens OX=9606 GN=IVD PE=1 SV=2;Isoform 2 of Isovaleryl-CoA dehydrogenase, mitochondrial OS=Homo sapiens OX=9606 GN=IVD	sp|P26440|IVD_HUMAN;sp|P26440-2|IVD_HUMAN	0	107.25	sp|P26440|IVD_HUMAN;sp|P26440-2|IVD_HUMAN	2	14	58.9	46.65	426	3918300000	418	178100000	1	1	2	3	11	11	5	22	27
S100A4	P26447	S10A4_HUMAN	+	cellsurface			+		+		+																	Protein S100-A4 OS=Homo sapiens OX=9606 GN=S100A4 PE=1 SV=1	sp|P26447|S10A4_HUMAN	0	88.223	sp|P26447|S10A4_HUMAN	1	9	91.1	11.728	101	12248000000	415	2041300000	1	1	12	10	12	12	22	24	46
MGAT1	P26572	MGAT1_HUMAN	+	cellmembrane			+		+		+																	Alpha-1,3-mannosyl-glycoprotein 2-beta-N-acetylglucosaminyltransferase OS=Homo sapiens OX=9606 GN=MGAT1 PE=1 SV=2	sp|P26572|MGAT1_HUMAN	0.001552	3.9876	sp|P26572|MGAT1_HUMAN	1	5	18.7	50.878	445	401650000	157	21140000	1	1	11	11	1	3	22	4	26
TARS	P26639	SYTC_HUMAN	+	cellpart			+		+		+																	Threonine--tRNA ligase, cytoplasmic OS=Homo sapiens OX=9606 GN=TARS PE=1 SV=3;Isoform 2 of Threonine--tRNA ligase, cytoplasmic OS=Homo sapiens OX=9606 GN=TARS	sp|P26639|SYTC_HUMAN;sp|P26639-2|SYTC_HUMAN	0	25.985	sp|P26639|SYTC_HUMAN;sp|P26639-2|SYTC_HUMAN	2	18	37.1	83.434	723	1650500000	281	38383000	1	1	4	5	11	11	9	22	31
VARS	P26640	SYVC_HUMAN	+	cellpart							+																	Valine--tRNA ligase OS=Homo sapiens OX=9606 GN=VARS PE=1 SV=4	sp|P26640|SYVC_HUMAN	0.0016216	4.847	sp|P26640|SYVC_HUMAN;sp|P26640-2|SYVC_HUMAN	2	6	10.6	140.47	1264	125180000	16	2276000	0	1	0	0	3	3	0	6	6
EEF1G	P26641	EF1G_HUMAN	+	cellpart			+		+		+																	Elongation factor 1-gamma OS=Homo sapiens OX=9606 GN=EEF1G PE=1 SV=3	sp|P26641|EF1G_HUMAN	0	59.904	sp|P26641|EF1G_HUMAN	1	18	62	50.118	437	8780200000	838	351210000	1	1	10	11	12	12	21	24	45
FKBP2	P26885	FKBP2_HUMAN	+	cellmembrane							+																	Peptidyl-prolyl cis-trans isomerase FKBP2 OS=Homo sapiens OX=9606 GN=FKBP2 PE=1 SV=2	sp|P26885|FKBP2_HUMAN	0.0017281	6.4044	sp|P26885|FKBP2_HUMAN	1	7	62.7	15.649	142	591970000	68	84567000	0	1	0	0	8	8	0	16	16
STOM	P27105	STOM_HUMAN	+	cellmembrane			+	+	+	+	+																	Erythrocyte band 7 integral membrane protein OS=Homo sapiens OX=9606 GN=STOM PE=1 SV=3	sp|P27105|STOM_HUMAN	0	323.31	sp|P27105|STOM_HUMAN;sp|P27105-2|STOM_HUMAN	2	32	75.3	31.73	288	442310000000	5921	29487000000	1	1	12	12	12	12	24	24	48
PON1	P27169	PON1_HUMAN	+	serum/plasma	other		+	+	+	+	+																	Serum paraoxonase/arylesterase 1 OS=Homo sapiens OX=9606 GN=PON1 PE=1 SV=3	sp|P27169|PON1_HUMAN	0	307.64	sp|P27169|PON1_HUMAN	1	20	74.4	39.731	355	40491000000	3557	2699400000	1	1	12	12	12	12	24	24	48
MAOB	P27338	AOFB_HUMAN	+	cellmembrane							+																	Amine oxidase [flavin-containing] B OS=Homo sapiens OX=9606 GN=MAOB PE=1 SV=3;Isoform 2 of Amine oxidase [flavin-containing] B OS=Homo sapiens OX=9606 GN=MAOB	sp|P27338|AOFB_HUMAN;sp|P27338-2|AOFB_HUMAN	0	323.31	sp|P27338|AOFB_HUMAN;sp|P27338-2|AOFB_HUMAN	2	42	74.2	58.762	520	58466000000	2965	2165400000	1	1	12	12	12	12	24	24	48
YWHAQ	P27348	1433T_HUMAN	+	cellpart		focal adhesion	+		+		+																	14-3-3 protein theta OS=Homo sapiens OX=9606 GN=YWHAQ PE=1 SV=1	sp|P27348|1433T_HUMAN	0	323.31	sp|P27348|1433T_HUMAN	1	24	84.1	27.764	245	62274000000	2027	4448100000	1	1	12	12	12	12	24	24	48
CAD	P27708	PYR1_HUMAN	+	cellpart			+		+		+																	CAD protein OS=Homo sapiens OX=9606 GN=CAD PE=1 SV=3	sp|P27708|PYR1_HUMAN	0.00066138	11.398	sp|P27708|PYR1_HUMAN	1	9	8.6	242.98	2225	1742100000	43	17960000	0	1	0	0	6	8	0	14	14
CALR	P27797	CALR_HUMAN	+	cellsurface		focal adhesion	+		+		+																	Calreticulin OS=Homo sapiens OX=9606 GN=CALR PE=1 SV=1	sp|P27797|CALR_HUMAN	0	323.31	sp|P27797|CALR_HUMAN	1	47	88	48.141	417	330160000000	7648	17377000000	1	1	12	12	12	12	24	24	48
CANX	P27824	CALX_HUMAN	+	cellmembrane			+		+		+																	Calnexin OS=Homo sapiens OX=9606 GN=CANX PE=1 SV=2;Isoform 2 of Calnexin OS=Homo sapiens OX=9606 GN=CANX	sp|P27824|CALX_HUMAN;sp|P27824-2|CALX_HUMAN	0	323.31	sp|P27824|CALX_HUMAN;sp|P27824-2|CALX_HUMAN	2	64	69.4	67.567	592	322000000000	8938	14000000000	1	1	12	12	12	12	24	24	48
CFP	P27918	PROP_HUMAN	+	serum/plasma	other																							Properdin OS=Homo sapiens OX=9606 GN=CFP PE=1 SV=2	sp|P27918|PROP_HUMAN	0	257.99	sp|P27918|PROP_HUMAN	1	18	42.9	51.276	469	33466000000	2105	1761300000	1	1	12	12	12	12	24	24	48
PIK3R1	P27986	P85A_HUMAN	+	cellpart		Cell junction					+																	Phosphatidylinositol 3-kinase regulatory subunit alpha OS=Homo sapiens OX=9606 GN=PIK3R1 PE=1 SV=2;Isoform 4 of Phosphatidylinositol 3-kinase regulatory subunit alpha OS=Homo sapiens OX=9606 GN=PIK3R1	sp|P27986|P85A_HUMAN;sp|P27986-4|P85A_HUMAN	0.0016949	5.9835	sp|P27986|P85A_HUMAN;sp|P27986-4|P85A_HUMAN;sp|P27986-5|P85A_HUMAN;sp|P27986-3|P85A_HUMAN;sp|P27986-2|P85A_HUMAN	5	3	8.8	83.597	724	396310000	28	11656000	0	1	0	0	1	2	0	3	3
PSMB8	P28062-2	PSB8_HUMAN	+	cellpart			+		+		+																	Isoform 2 of Proteasome subunit beta type-8 OS=Homo sapiens OX=9606 GN=PSMB8;Proteasome subunit beta type-8 OS=Homo sapiens OX=9606 GN=PSMB8 PE=1 SV=3	sp|P28062-2|PSB8_HUMAN;sp|P28062|PSB8_HUMAN	0	19.624	sp|P28062-2|PSB8_HUMAN;sp|P28062|PSB8_HUMAN	2	8	46.7	29.769	272	2336100000	290	194670000	1	1	5	7	10	11	12	21	33
PSMB9	P28065-2	PSB9_HUMAN	+	cellpart			+		+		+																	Isoform LMP2.S of Proteasome subunit beta type-9 OS=Homo sapiens OX=9606 GN=PSMB9;Proteasome subunit beta type-9 OS=Homo sapiens OX=9606 GN=PSMB9 PE=1 SV=2	sp|P28065-2|PSB9_HUMAN;sp|P28065|PSB9_HUMAN	0	47.016	sp|P28065-2|PSB9_HUMAN;sp|P28065|PSB9_HUMAN	2	6	61.2	22.328	209	447860000	37	55983000	1	1	0	2	5	4	2	9	11
PSMA5	P28066	PSA5_HUMAN	+	cellpart			+		+		+																	Proteasome subunit alpha type-5 OS=Homo sapiens OX=9606 GN=PSMA5 PE=1 SV=3;Isoform 2 of Proteasome subunit alpha type-5 OS=Homo sapiens OX=9606 GN=PSMA5	sp|P28066|PSA5_HUMAN;sp|P28066-2|PSA5_HUMAN	0	123.24	sp|P28066|PSA5_HUMAN;sp|P28066-2|PSA5_HUMAN	2	9	51.9	26.411	241	6523600000	510	652360000	1	1	10	10	12	12	20	24	44
PSMB4	P28070	PSB4_HUMAN	+	cellpart			+		+		+																	Proteasome subunit beta type-4 OS=Homo sapiens OX=9606 GN=PSMB4 PE=1 SV=4	sp|P28070|PSB4_HUMAN	0	48.469	sp|P28070|PSB4_HUMAN	1	5	36.4	29.204	264	1886000000	167	171460000	1	1	5	4	7	10	9	17	26
PSMB6	P28072	PSB6_HUMAN	+	cellpart			+		+		+																	Proteasome subunit beta type-6 OS=Homo sapiens OX=9606 GN=PSMB6 PE=1 SV=4	sp|P28072|PSB6_HUMAN	0.0017007	6.0526	sp|P28072|PSB6_HUMAN	1	5	38.9	25.357	239	666110000	80	60556000	1	1	1	1	7	7	2	14	16
GSTM2	P28161	GSTM2_HUMAN	+	cellpart			+		+		+																	Glutathione S-transferase Mu 2 OS=Homo sapiens OX=9606 GN=GSTM2 PE=1 SV=2;Isoform 2 of Glutathione S-transferase Mu 2 OS=Homo sapiens OX=9606 GN=GSTM2	sp|P28161|GSTM2_HUMAN;sp|P28161-2|GSTM2_HUMAN	0.0014955	3.2729	sp|P28161|GSTM2_HUMAN;sp|P28161-2|GSTM2_HUMAN;sp|Q03013-3|GSTM4_HUMAN	3	2	27.5	25.744	218	114990000	29	6764400	1	1	1	1	4	3	2	7	9
ABCD3	P28288	ABCD3_HUMAN	+	cellmembrane							+																	ATP-binding cassette sub-family D member 3 OS=Homo sapiens OX=9606 GN=ABCD3 PE=1 SV=1;Isoform 2 of ATP-binding cassette sub-family D member 3 OS=Homo sapiens OX=9606 GN=ABCD3	sp|P28288|ABCD3_HUMAN;sp|P28288-2|ABCD3_HUMAN	0	41.952	sp|P28288|ABCD3_HUMAN;sp|P28288-2|ABCD3_HUMAN;sp|P28288-3|ABCD3_HUMAN	3	11	23.2	75.475	659	529520000	106	14709000	0	1	0	0	8	9	0	17	17
TMOD1	P28289	TMOD1_HUMAN	+	cellpart																								Tropomodulin-1 OS=Homo sapiens OX=9606 GN=TMOD1 PE=1 SV=1;Isoform 2 of Tropomodulin-1 OS=Homo sapiens OX=9606 GN=TMOD1	sp|P28289|TMOD1_HUMAN;sp|P28289-2|TMOD1_HUMAN	0.001221	8.2567	sp|P28289|TMOD1_HUMAN;sp|P28289-2|TMOD1_HUMAN	2	7	39.3	40.569	359	74031000	24	4354800	1	0	1	1	0	0	2	0	2
NDUFS1	P28331	NDUS1_HUMAN	+	cellmembrane							+																	NADH-ubiquinone oxidoreductase 75 kDa subunit, mitochondrial OS=Homo sapiens OX=9606 GN=NDUFS1 PE=1 SV=3;Isoform 2 of NADH-ubiquinone oxidoreductase 75 kDa subunit, mitochondrial OS=Homo sapiens OX=9606 GN=NDUFS1;Isoform 4 of NADH-ubiquinone oxidoreductase	sp|P28331|NDUS1_HUMAN;sp|P28331-2|NDUS1_HUMAN;sp|P28331-4|NDUS1_HUMAN;sp|P28331-5|NDUS1_HUMAN;sp|P28331-3|NDUS1_HUMAN	0	92.762	sp|P28331|NDUS1_HUMAN;sp|P28331-2|NDUS1_HUMAN;sp|P28331-4|NDUS1_HUMAN;sp|P28331-5|NDUS1_HUMAN;sp|P28331-3|NDUS1_HUMAN	5	20	49.1	79.467	727	2597300000	409	68351000	1	1	3	3	11	11	6	22	28
MAPK1	P28482	MK01_HUMAN	+	cellpart		Endosome					+																	Mitogen-activated protein kinase 1 OS=Homo sapiens OX=9606 GN=MAPK1 PE=1 SV=3;Isoform 2 of Mitogen-activated protein kinase 1 OS=Homo sapiens OX=9606 GN=MAPK1	sp|P28482|MK01_HUMAN;sp|P28482-2|MK01_HUMAN	0	40.303	sp|P28482|MK01_HUMAN;sp|P28482-2|MK01_HUMAN;sp|P31152|MK04_HUMAN	3	10	40.6	41.389	360	1839800000	191	83628000	1	1	3	2	10	10	5	20	25
GRN	P28799	GRN_HUMAN	+	cellsurface			+		+		+																	Progranulin OS=Homo sapiens OX=9606 GN=GRN PE=1 SV=2;Isoform 2 of Progranulin OS=Homo sapiens OX=9606 GN=GRN	sp|P28799|GRN_HUMAN;sp|P28799-2|GRN_HUMAN	0	13.1	sp|P28799|GRN_HUMAN;sp|P28799-2|GRN_HUMAN	2	4	7.4	63.544	593	739880000	273	33631000	1	1	5	6	11	11	11	22	33
LAP3	P28838-2	AMPL_HUMAN	+	cellpart		focal adhesion	+		+		+																	Isoform 2 of Cytosol aminopeptidase OS=Homo sapiens OX=9606 GN=LAP3;Cytosol aminopeptidase OS=Homo sapiens OX=9606 GN=LAP3 PE=1 SV=3	sp|P28838-2|AMPL_HUMAN;sp|P28838|AMPL_HUMAN	0	170.72	sp|P28838-2|AMPL_HUMAN;sp|P28838|AMPL_HUMAN	2	27	79.3	52.771	488	6137200000	816	204570000	1	1	4	6	12	12	10	24	34
PCSK6	P29122-2	PCSK6_HUMAN	+	cellsurface							+																	Isoform PACE4A-II of Proprotein convertase subtilisin/kexin type 6 OS=Homo sapiens OX=9606 GN=PCSK6;Proprotein convertase subtilisin/kexin type 6 OS=Homo sapiens OX=9606 GN=PCSK6 PE=1 SV=1;Isoform PACE4CS of Proprotein convertase subtilisin/kexin type 6 OS	sp|P29122-2|PCSK6_HUMAN;sp|P29122|PCSK6_HUMAN;sp|P29122-5|PCSK6_HUMAN;sp|P29122-4|PCSK6_HUMAN;sp|P29122-6|PCSK6_HUMAN	0	102.06	sp|P29122-2|PCSK6_HUMAN;sp|P29122|PCSK6_HUMAN;sp|P29122-5|PCSK6_HUMAN;sp|P29122-4|PCSK6_HUMAN;sp|P29122-6|PCSK6_HUMAN;sp|P29122-3|PCSK6_HUMAN	6	24	40.1	105.12	956	4201800000	681	91343000	1	1	4	6	10	10	10	20	30
TPP2	P29144	TPP2_HUMAN	+	cellpart							+																	Tripeptidyl-peptidase 2 OS=Homo sapiens OX=9606 GN=TPP2 PE=1 SV=4	sp|P29144|TPP2_HUMAN	0	323.31	sp|P29144|TPP2_HUMAN	1	46	54.8	138.35	1249	8268600000	1077	127210000	1	1	8	7	12	12	15	24	39
IMPA1	P29218	IMPA1_HUMAN	+	cellpart							+																	Inositol monophosphatase 1 OS=Homo sapiens OX=9606 GN=IMPA1 PE=1 SV=1;Isoform 3 of Inositol monophosphatase 1 OS=Homo sapiens OX=9606 GN=IMPA1;Isoform 2 of Inositol monophosphatase 1 OS=Homo sapiens OX=9606 GN=IMPA1	sp|P29218|IMPA1_HUMAN;sp|P29218-3|IMPA1_HUMAN;sp|P29218-2|IMPA1_HUMAN	0.00065147	10.723	sp|P29218|IMPA1_HUMAN;sp|P29218-3|IMPA1_HUMAN;sp|P29218-2|IMPA1_HUMAN	3	7	35.4	30.188	277	907550000	157	56722000	1	1	2	3	10	10	5	20	25
CCN2	P29279	CCN2_HUMAN	+	cellsurface																								CCN family member 2 OS=Homo sapiens OX=9606 GN=CCN2 PE=1 SV=2;Isoform 2 of CCN family member 2 OS=Homo sapiens OX=9606 GN=CCN2	sp|P29279|CCN2_HUMAN;sp|P29279-2|CCN2_HUMAN	0	26.859	sp|P29279|CCN2_HUMAN;sp|P29279-2|CCN2_HUMAN	2	12	52.1	38.091	349	1932000000	163	80499000	1	1	2	2	7	8	4	15	19
PTPN6	P29350	PTN6_HUMAN	+	cellpart		Cell junction	+		+		+																	Tyrosine-protein phosphatase non-receptor type 6 OS=Homo sapiens OX=9606 GN=PTPN6 PE=1 SV=1;Isoform 2 of Tyrosine-protein phosphatase non-receptor type 6 OS=Homo sapiens OX=9606 GN=PTPN6;Isoform 4 of Tyrosine-protein phosphatase non-receptor type 6 OS=Homo	sp|P29350|PTN6_HUMAN;sp|P29350-3|PTN6_HUMAN;sp|P29350-4|PTN6_HUMAN;sp|P29350-2|PTN6_HUMAN	0	166.67	sp|P29350|PTN6_HUMAN;sp|P29350-3|PTN6_HUMAN;sp|P29350-4|PTN6_HUMAN;sp|P29350-2|PTN6_HUMAN	4	33	71.4	67.56	595	12451000000	1711	345860000	1	1	10	12	12	12	22	24	46
SHC1	P29353-5	SHC1_HUMAN	+	cellpart							+																	Isoform 5 of SHC-transforming protein 1 OS=Homo sapiens OX=9606 GN=SHC1;Isoform p46Shc of SHC-transforming protein 1 OS=Homo sapiens OX=9606 GN=SHC1;Isoform p52Shc of SHC-transforming protein 1 OS=Homo sapiens OX=9606 GN=SHC1;Isoform 7 of SHC-transforming	sp|P29353-5|SHC1_HUMAN;sp|P29353-3|SHC1_HUMAN;sp|P29353-2|SHC1_HUMAN;sp|P29353-7|SHC1_HUMAN;sp|P29353|SHC1_HUMAN;sp|P29353-6|SHC1_HUMAN	0.0011891	7.351	sp|P29353-5|SHC1_HUMAN;sp|P29353-3|SHC1_HUMAN;sp|P29353-2|SHC1_HUMAN;sp|P29353-7|SHC1_HUMAN;sp|P29353|SHC1_HUMAN;sp|P29353-6|SHC1_HUMAN	6	3	18.7	40.414	369	76143000	13	5076200	0	1	0	0	2	2	0	4	4
TKT	P29401	TKT_HUMAN	+	cellpart			+		+		+																	Transketolase OS=Homo sapiens OX=9606 GN=TKT PE=1 SV=3;Isoform 2 of Transketolase OS=Homo sapiens OX=9606 GN=TKT	sp|P29401|TKT_HUMAN;sp|P29401-2|TKT_HUMAN	0	226.33	sp|P29401|TKT_HUMAN;sp|P29401-2|TKT_HUMAN	2	38	81.7	67.877	623	18585000000	1984	663750000	1	1	11	12	12	12	23	24	47
SERPINA4	P29622	KAIN_HUMAN	+	serum/plasma	other		+		+		+																	Kallistatin OS=Homo sapiens OX=9606 GN=SERPINA4 PE=1 SV=3	sp|P29622|KAIN_HUMAN	0	62.662	sp|P29622|KAIN_HUMAN	1	18	52.9	48.541	427	3632100000	937	151340000	1	1	12	12	8	9	24	17	41
EEF1D	P29692	EF1D_HUMAN	+	cellpart							+																	Elongation factor 1-delta OS=Homo sapiens OX=9606 GN=EEF1D PE=1 SV=5;Isoform 2 of Elongation factor 1-delta OS=Homo sapiens OX=9606 GN=EEF1D;Isoform 4 of Elongation factor 1-delta OS=Homo sapiens OX=9606 GN=EEF1D	sp|P29692|EF1D_HUMAN;sp|P29692-2|EF1D_HUMAN;sp|P29692-4|EF1D_HUMAN	0	73.2	sp|P29692|EF1D_HUMAN;sp|P29692-2|EF1D_HUMAN;sp|P29692-4|EF1D_HUMAN	3	14	59.1	31.121	281	6158300000	704	384900000	1	1	7	7	12	12	14	24	38
MARCKS	P29966	MARCS_HUMAN	+	cellpart		focal adhesion	+		+																			Myristoylated alanine-rich C-kinase substrate OS=Homo sapiens OX=9606 GN=MARCKS PE=1 SV=4	sp|P29966|MARCS_HUMAN	0	43.108	sp|P29966|MARCS_HUMAN	1	6	43.7	31.554	332	165080000	53	15007000	1	0	6	5	0	0	11	0	11
AQP1	P29972-4	AQP1_HUMAN	+	cellmembrane			+		+																			Isoform 4 of Aquaporin-1 OS=Homo sapiens OX=9606 GN=AQP1;Isoform 2 of Aquaporin-1 OS=Homo sapiens OX=9606 GN=AQP1;Isoform 3 of Aquaporin-1 OS=Homo sapiens OX=9606 GN=AQP1;Aquaporin-1 OS=Homo sapiens OX=9606 GN=AQP1 PE=1 SV=3	sp|P29972-4|AQP1_HUMAN;sp|P29972-2|AQP1_HUMAN;sp|P29972-3|AQP1_HUMAN;sp|P29972|AQP1_HUMAN	0	322.1	sp|P29972-4|AQP1_HUMAN;sp|P29972-2|AQP1_HUMAN;sp|P29972-3|AQP1_HUMAN;sp|P29972|AQP1_HUMAN	4	5	69.5	16.677	154	1597000000	258	798510000	1	1	10	10	7	7	20	14	34
ALDH4A1	P30038	AL4A1_HUMAN	+	cellpart							+																	Delta-1-pyrroline-5-carboxylate dehydrogenase, mitochondrial OS=Homo sapiens OX=9606 GN=ALDH4A1 PE=1 SV=3;Isoform 3 of Delta-1-pyrroline-5-carboxylate dehydrogenase, mitochondrial OS=Homo sapiens OX=9606 GN=ALDH4A1;Isoform 2 of Delta-1-pyrroline-5-carboxyl	sp|P30038|AL4A1_HUMAN;sp|P30038-3|AL4A1_HUMAN;sp|P30038-2|AL4A1_HUMAN	0	35.624	sp|P30038|AL4A1_HUMAN;sp|P30038-3|AL4A1_HUMAN;sp|P30038-2|AL4A1_HUMAN	3	15	43.2	61.719	563	2601100000	405	89692000	1	1	3	3	11	11	6	22	28
ERP29	P30040	ERP29_HUMAN	+	cellpart							+																	Endoplasmic reticulum resident protein 29 OS=Homo sapiens OX=9606 GN=ERP29 PE=1 SV=4	sp|P30040|ERP29_HUMAN	0	155.65	sp|P30040|ERP29_HUMAN;sp|P30040-2|ERP29_HUMAN	2	18	64.4	28.993	261	14366000000	1322	1026100000	1	1	8	9	12	12	17	24	41
PRDX6	P30041	PRDX6_HUMAN	+	cellpart			+		+		+																	Peroxiredoxin-6 OS=Homo sapiens OX=9606 GN=PRDX6 PE=1 SV=3	sp|P30041|PRDX6_HUMAN	0	323.31	sp|P30041|PRDX6_HUMAN	1	37	91.5	25.035	224	106370000000	3495	7091200000	1	1	11	12	12	12	23	24	47
BLVRB	P30043	BLVRB_HUMAN	+	cellpart			+		+		+																	Flavin reductase (NADPH) OS=Homo sapiens OX=9606 GN=BLVRB PE=1 SV=3	sp|P30043|BLVRB_HUMAN	0.0014993	3.3304	sp|P30043|BLVRB_HUMAN	1	3	32	22.119	206	332150000	44	33215000	1	1	2	1	5	6	3	11	14
PRDX5	P30044-2	PRDX5_HUMAN	+	cellpart			+		+		+																	Isoform Cytoplasmic+peroxisomal of Peroxiredoxin-5, mitochondrial OS=Homo sapiens OX=9606 GN=PRDX5	sp|P30044-2|PRDX5_HUMAN	0	144.97	sp|P30044-2|PRDX5_HUMAN	1	17	78.4	17.031	162	30348000000	2159	3372000000	1	1	10	11	12	12	21	24	45
DDT	P30046	DOPD_HUMAN	+	cellpart			+		+		+																	D-dopachrome decarboxylase OS=Homo sapiens OX=9606 GN=DDT PE=1 SV=3;Isoform 2 of D-dopachrome decarboxylase OS=Homo sapiens OX=9606 GN=DDT;D-dopachrome decarboxylase-like protein OS=Homo sapiens OX=9606 GN=DDTL PE=2 SV=1	sp|P30046|DOPD_HUMAN;sp|P30046-2|DOPD_HUMAN;sp|A6NHG4|DDTL_HUMAN	0	15.089	sp|P30046|DOPD_HUMAN;sp|P30046-2|DOPD_HUMAN;sp|A6NHG4|DDTL_HUMAN	3	6	56.8	12.712	118	1951400000	202	278760000	1	1	6	5	12	12	11	24	35
PRDX3	P30048-2	PRDX3_HUMAN	+	cellpart							+																	Isoform 2 of Thioredoxin-dependent peroxide reductase, mitochondrial OS=Homo sapiens OX=9606 GN=PRDX3;Thioredoxin-dependent peroxide reductase, mitochondrial OS=Homo sapiens OX=9606 GN=PRDX3 PE=1 SV=3	sp|P30048-2|PRDX3_HUMAN;sp|P30048|PRDX3_HUMAN	0	323.31	sp|P30048-2|PRDX3_HUMAN;sp|P30048|PRDX3_HUMAN	2	17	72.7	25.838	238	57904000000	2147	4825300000	1	1	11	12	12	12	23	24	47
ATP5F1D	P30049	ATPD_HUMAN	+	cellpart							+																	ATP synthase subunit delta, mitochondrial OS=Homo sapiens OX=9606 GN=ATP5F1D PE=1 SV=2	sp|P30049|ATPD_HUMAN	0	77.519	sp|P30049|ATPD_HUMAN	1	5	61.9	17.49	168	18043000000	866	6014300000	1	1	11	12	12	12	23	24	47
ECHS1	P30084	ECHM_HUMAN	+	cellpart							+																	Enoyl-CoA hydratase, mitochondrial OS=Homo sapiens OX=9606 GN=ECHS1 PE=1 SV=4	sp|P30084|ECHM_HUMAN	0	172.89	sp|P30084|ECHM_HUMAN	1	19	73.8	31.387	290	11428000000	1123	601480000	1	1	11	10	12	12	21	24	45
CMPK1	P30085	KCY_HUMAN	+	cellpart			+		+		+																	UMP-CMP kinase OS=Homo sapiens OX=9606 GN=CMPK1 PE=1 SV=3;Isoform 3 of UMP-CMP kinase OS=Homo sapiens OX=9606 GN=CMPK1;Isoform 2 of UMP-CMP kinase OS=Homo sapiens OX=9606 GN=CMPK1	sp|P30085|KCY_HUMAN;sp|P30085-3|KCY_HUMAN;sp|P30085-2|KCY_HUMAN	0	33.899	sp|P30085|KCY_HUMAN;sp|P30085-3|KCY_HUMAN;sp|P30085-2|KCY_HUMAN	3	13	59.7	22.222	196	1711900000	261	171190000	1	1	6	6	11	11	12	22	34
PEBP1	P30086	PEBP1_HUMAN	+	cellpart			+		+		+																	Phosphatidylethanolamine-binding protein 1 OS=Homo sapiens OX=9606 GN=PEBP1 PE=1 SV=3	sp|P30086|PEBP1_HUMAN	0	40.919	sp|P30086|PEBP1_HUMAN	1	11	83.4	21.057	187	1988800000	212	198880000	1	1	6	4	11	11	10	22	32
PDIA3	P30101	PDIA3_HUMAN	+	cellpart		focal adhesion	+		+		+																	Protein disulfide-isomerase A3 OS=Homo sapiens OX=9606 GN=PDIA3 PE=1 SV=4	sp|P30101|PDIA3_HUMAN	0	323.31	sp|P30101|PDIA3_HUMAN	1	68	81.8	56.782	505	525270000000	9044	19454000000	1	1	12	12	12	12	24	24	48
PPP2R1A	P30153	2AAA_HUMAN	+	cellpart			+		+		+																	Serine/threonine-protein phosphatase 2A 65 kDa regulatory subunit A alpha isoform OS=Homo sapiens OX=9606 GN=PPP2R1A PE=1 SV=4	sp|P30153|2AAA_HUMAN	0	209.26	sp|P30153|2AAA_HUMAN	1	32	60.4	65.308	589	10909000000	1228	340910000	1	1	10	12	12	12	22	24	46
FCER1G	P30273	FCERG_HUMAN	+	cellmembrane							+																	High affinity immunoglobulin epsilon receptor subunit gamma OS=Homo sapiens OX=9606 GN=FCER1G PE=1 SV=1	sp|P30273|FCERG_HUMAN	0	31.904	sp|P30273|FCERG_HUMAN	1	3	30.2	9.6674	86	11362000000	436	3787300000	1	1	11	10	12	12	21	24	45
PPIF	P30405	PPIF_HUMAN	+	cellpart							+																	Peptidyl-prolyl cis-trans isomerase F, mitochondrial OS=Homo sapiens OX=9606 GN=PPIF PE=1 SV=1	sp|P30405|PPIF_HUMAN	0	323.31	sp|P30405|PPIF_HUMAN;sp|P30405-2|PPIF_HUMAN	2	19	75.4	22.04	207	205730000000	3100	18703000000	1	1	12	12	12	12	24	24	48
HLA-A	P30455	1A36_HUMAN	+	cellmembrane																								HLA class I histocompatibility antigen, A-36 alpha chain OS=Homo sapiens OX=9606 GN=HLA-A PE=1 SV=1;HLA class I histocompatibility antigen, A-1 alpha chain OS=Homo sapiens OX=9606 GN=HLA-A PE=1 SV=1	sp|P30455|1A36_HUMAN;sp|P30443|1A01_HUMAN	0	323.31	sp|P30455|1A36_HUMAN;sp|P30443|1A01_HUMAN	2	31	79.5	40.933	365	307780000000	4074	15389000000	1	1	12	12	12	12	24	24	48
HLA-B	P30460	1B08_HUMAN	+	cellmembrane																								HLA class I histocompatibility antigen, B-8 alpha chain OS=Homo sapiens OX=9606 GN=HLA-B PE=1 SV=1	sp|P30460|1B08_HUMAN	0	323.31	sp|P30460|1B08_HUMAN	1	37	67.4	40.33	362	473170000000	4461	26287000000	1	1	12	12	12	12	24	24	48
HMOX2	P30519	HMOX2_HUMAN	+	cellmembrane							+																	Heme oxygenase 2 OS=Homo sapiens OX=9606 GN=HMOX2 PE=1 SV=2;Isoform 2 of Heme oxygenase 2 OS=Homo sapiens OX=9606 GN=HMOX2	sp|P30519|HMOX2_HUMAN;sp|P30519-2|HMOX2_HUMAN	0.0017462	6.7224	sp|P30519|HMOX2_HUMAN;sp|P30519-2|HMOX2_HUMAN	2	6	35.4	36.032	316	58286000	14	3238100	0	1	0	0	3	3	0	6	6
TSPO	P30536	TSPO_HUMAN	+	cellmembrane			+		+																			Translocator protein OS=Homo sapiens OX=9606 GN=TSPO PE=1 SV=3	sp|P30536|TSPO_HUMAN	0.0015408	3.8279	sp|P30536|TSPO_HUMAN	1	2	29	18.828	169	359360000	47	71873000	1	1	2	2	7	8	4	15	19
ADSL	P30566	PUR8_HUMAN	+	cellpart							+																	Adenylosuccinate lyase OS=Homo sapiens OX=9606 GN=ADSL PE=1 SV=2;Isoform 2 of Adenylosuccinate lyase OS=Homo sapiens OX=9606 GN=ADSL	sp|P30566|PUR8_HUMAN;sp|P30566-2|PUR8_HUMAN	0.00063371	9.7264	sp|P30566|PUR8_HUMAN;sp|P30566-2|PUR8_HUMAN	2	8	31.6	54.889	484	391320000	43	16305000	1	1	0	1	5	8	1	13	14
SRI	P30626-3	SORCN_HUMAN	+	cellmembrane			+		+		+																	Isoform 3 of Sorcin OS=Homo sapiens OX=9606 GN=SRI;Isoform 2 of Sorcin OS=Homo sapiens OX=9606 GN=SRI;Sorcin OS=Homo sapiens OX=9606 GN=SRI PE=1 SV=1	sp|P30626-3|SORCN_HUMAN;sp|P30626-2|SORCN_HUMAN;sp|P30626|SORCN_HUMAN	0.00066181	11.435	sp|P30626-3|SORCN_HUMAN;sp|P30626-2|SORCN_HUMAN;sp|P30626|SORCN_HUMAN	3	6	42.2	20.006	180	1978200000	189	179830000	1	1	2	4	10	10	6	20	26
SERPINB1	P30740	ILEU_HUMAN	+	cellsurface			+		+		+																	Leukocyte elastase inhibitor OS=Homo sapiens OX=9606 GN=SERPINB1 PE=1 SV=1;Isoform 2 of Leukocyte elastase inhibitor OS=Homo sapiens OX=9606 GN=SERPINB1	sp|P30740|ILEU_HUMAN;sp|P30740-2|ILEU_HUMAN	0	281.79	sp|P30740|ILEU_HUMAN;sp|P30740-2|ILEU_HUMAN;sp|O75830|SPI2_HUMAN	3	24	68.3	42.741	379	47867000000	2106	2519300000	1	1	11	11	12	12	22	24	46
SDHA	P31040	SDHA_HUMAN	+	cellmembrane																								Succinate dehydrogenase [ubiquinone] flavoprotein subunit, mitochondrial OS=Homo sapiens OX=9606 GN=SDHA PE=1 SV=2;Isoform 2 of Succinate dehydrogenase [ubiquinone] flavoprotein subunit, mitochondrial OS=Homo sapiens OX=9606 GN=SDHA;Isoform 3 of Succinate	sp|P31040|SDHA_HUMAN;sp|P31040-2|SDHA_HUMAN;sp|P31040-3|SDHA_HUMAN	0	242.22	sp|P31040|SDHA_HUMAN;sp|P31040-2|SDHA_HUMAN;sp|P31040-3|SDHA_HUMAN	3	24	56.6	72.691	664	13900000000	1400	448400000	1	1	10	12	12	12	22	24	46
CORO1A	P31146	COR1A_HUMAN	+	cellpart		Endosome	+		+		+																	Coronin-1A OS=Homo sapiens OX=9606 GN=CORO1A PE=1 SV=4	sp|P31146|COR1A_HUMAN	0	323.31	sp|P31146|COR1A_HUMAN	1	39	62	51.026	461	82901000000	3987	4145100000	1	1	12	12	12	12	24	24	48
GDI1	P31150	GDIA_HUMAN	+	cellpart							+																	Rab GDP dissociation inhibitor alpha OS=Homo sapiens OX=9606 GN=GDI1 PE=1 SV=2	sp|P31150|GDIA_HUMAN	0	323.31	sp|P31150|GDIA_HUMAN	1	41	92.2	50.582	447	36622000000	2598	1525900000	1	1	11	11	12	12	22	24	46
S100A7	P31151	S10A7_HUMAN	+	cellsurface		focal adhesion																						Protein S100-A7 OS=Homo sapiens OX=9606 GN=S100A7 PE=1 SV=4	sp|P31151|S10A7_HUMAN	0.0012041	7.7515	sp|P31151|S10A7_HUMAN;sp|Q86SG5|S1A7A_HUMAN	2	6	55.4	11.471	101	25578000	10	3654000	0	0	0	0	0	0	0	0	0
PRKAR2B	P31323	KAP3_HUMAN	+	cellpart			+		+		+																	cAMP-dependent protein kinase type II-beta regulatory subunit OS=Homo sapiens OX=9606 GN=PRKAR2B PE=1 SV=3	sp|P31323|KAP3_HUMAN	0	138.79	sp|P31323|KAP3_HUMAN	1	20	75.4	46.302	418	6989700000	875	332840000	1	1	9	10	12	12	19	24	43
DNAJA1	P31689	DNJA1_HUMAN	+	cellmembrane			+		+		+																	DnaJ homolog subfamily A member 1 OS=Homo sapiens OX=9606 GN=DNAJA1 PE=1 SV=2;Isoform 2 of DnaJ homolog subfamily A member 1 OS=Homo sapiens OX=9606 GN=DNAJA1	sp|P31689|DNJA1_HUMAN;sp|P31689-2|DNJA1_HUMAN	0	18.789	sp|P31689|DNJA1_HUMAN;sp|P31689-2|DNJA1_HUMAN	2	12	51.6	44.868	397	813840000	149	42834000	1	1	3	3	11	11	6	22	28
AKT1	P31749-2	AKT1_HUMAN	+	cellpart		Cell junction					+																	Isoform 2 of RAC-alpha serine/threonine-protein kinase OS=Homo sapiens OX=9606 GN=AKT1;RAC-alpha serine/threonine-protein kinase OS=Homo sapiens OX=9606 GN=AKT1 PE=1 SV=2;Isoform 2 of RAC-gamma serine/threonine-protein kinase OS=Homo sapiens OX=9606 GN=AKT	sp|P31749-2|AKT1_HUMAN;sp|P31749|AKT1_HUMAN;sp|Q9Y243-2|AKT3_HUMAN;sp|Q9Y243|AKT3_HUMAN	0.0099233	1.7932	sp|P31749-2|AKT1_HUMAN;sp|P31749|AKT1_HUMAN;sp|Q9Y243-2|AKT3_HUMAN;sp|Q9Y243|AKT3_HUMAN	4	2	7.9	48.346	418	67304000	3	2692200	0	0	0	0	0	0	0	0	0
UQCRC1	P31930	QCR1_HUMAN	+	cellpart							+																	Cytochrome b-c1 complex subunit 1, mitochondrial OS=Homo sapiens OX=9606 GN=UQCRC1 PE=1 SV=3	sp|P31930|QCR1_HUMAN	0	323.31	sp|P31930|QCR1_HUMAN	1	28	66.7	52.645	480	20822000000	1545	867570000	1	1	10	11	12	12	21	24	45
HIBADH	P31937	3HIDH_HUMAN	+	cellpart							+																	3-hydroxyisobutyrate dehydrogenase, mitochondrial OS=Homo sapiens OX=9606 GN=HIBADH PE=1 SV=2	sp|P31937|3HIDH_HUMAN	0	25.414	sp|P31937|3HIDH_HUMAN	1	10	46.4	35.329	336	516530000	71	39733000	0	1	0	0	9	9	0	18	18
ATIC	P31939	PUR9_HUMAN	+	cellpart			+		+		+																	Bifunctional purine biosynthesis protein PURH OS=Homo sapiens OX=9606 GN=ATIC PE=1 SV=3;Isoform 2 of Bifunctional purine biosynthesis protein PURH OS=Homo sapiens OX=9606 GN=ATIC	sp|P31939|PUR9_HUMAN;sp|P31939-2|PUR9_HUMAN	0	127.03	sp|P31939|PUR9_HUMAN;sp|P31939-2|PUR9_HUMAN	2	28	70.8	64.615	592	5662600000	395	153040000	1	1	6	5	12	12	11	24	35
CASP14	P31944	CASPE_HUMAN	+	cellpart																								Caspase-14 OS=Homo sapiens OX=9606 GN=CASP14 PE=1 SV=2	sp|P31944|CASPE_HUMAN	0.001574	4.2406	sp|P31944|CASPE_HUMAN	1	6	26.4	27.679	242	73754000	7	4917000	0	0	0	0	0	0	0	0	0
YWHAB	P31946-2	1433B_HUMAN	+	cellpart		focal adhesion	+		+		+																	Isoform Short of 14-3-3 protein beta/alpha OS=Homo sapiens OX=9606 GN=YWHAB	sp|P31946-2|1433B_HUMAN	0	323.31	sp|P31946-2|1433B_HUMAN	1	24	90.2	27.85	244	65729000000	2280	4694900000	1	1	12	12	12	12	24	24	48
SFN	P31947-2	1433S_HUMAN	+	cellpart			+		+		+																	Isoform 2 of 14-3-3 protein sigma OS=Homo sapiens OX=9606 GN=SFN;14-3-3 protein sigma OS=Homo sapiens OX=9606 GN=SFN PE=1 SV=1	sp|P31947-2|1433S_HUMAN;sp|P31947|1433S_HUMAN	0	37.128	sp|P31947-2|1433S_HUMAN;sp|P31947|1433S_HUMAN	2	10	68.1	24.336	216	962570000	51	68755000	1	1	3	2	3	2	5	5	10
STIP1	P31948	STIP1_HUMAN	+	cellpart							+																	Stress-induced-phosphoprotein 1 OS=Homo sapiens OX=9606 GN=STIP1 PE=1 SV=1;Isoform 2 of Stress-induced-phosphoprotein 1 OS=Homo sapiens OX=9606 GN=STIP1;Isoform 3 of Stress-induced-phosphoprotein 1 OS=Homo sapiens OX=9606 GN=STIP1	sp|P31948|STIP1_HUMAN;sp|P31948-2|STIP1_HUMAN;sp|P31948-3|STIP1_HUMAN	0	195.27	sp|P31948|STIP1_HUMAN;sp|P31948-2|STIP1_HUMAN;sp|P31948-3|STIP1_HUMAN	3	41	63.2	62.639	543	16945000000	1310	470680000	1	1	9	11	12	12	20	24	44
S100A11	P31949	S10AB_HUMAN	+	cellpart			+		+		+																	Protein S100-A11 OS=Homo sapiens OX=9606 GN=S100A11 PE=1 SV=2	sp|P31949|S10AB_HUMAN	0.0017351	6.592	sp|P31949|S10AB_HUMAN	1	2	25.7	11.74	105	145500000	52	29100000	1	1	4	4	1	1	8	2	10
PRDX2	P32119	PRDX2_HUMAN	+	cellpart			+		+		+																	Peroxiredoxin-2 OS=Homo sapiens OX=9606 GN=PRDX2 PE=1 SV=5	sp|P32119|PRDX2_HUMAN	0	42.892	sp|P32119|PRDX2_HUMAN;sp|P32119-2|PRDX2_HUMAN	2	14	66.7	21.892	198	8043500000	775	731230000	1	1	12	12	11	11	24	22	46
GK	P32189-1	GLPK_HUMAN	+	cellmembrane			+		+		+																	Isoform 1 of Glycerol kinase OS=Homo sapiens OX=9606 GN=GK;Isoform 4 of Glycerol kinase OS=Homo sapiens OX=9606 GN=GK;Isoform 2 of Glycerol kinase OS=Homo sapiens OX=9606 GN=GK;Glycerol kinase OS=Homo sapiens OX=9606 GN=GK PE=1 SV=3;Glycerol kinase 3 OS=Ho	sp|P32189-1|GLPK_HUMAN;sp|P32189-4|GLPK_HUMAN;sp|P32189-2|GLPK_HUMAN;sp|P32189|GLPK_HUMAN;sp|Q14409|GLPK3_HUMAN	0.0012469	9.2921	sp|P32189-1|GLPK_HUMAN;sp|P32189-4|GLPK_HUMAN;sp|P32189-2|GLPK_HUMAN;sp|P32189|GLPK_HUMAN;sp|Q14409|GLPK3_HUMAN;sp|Q14410|GLPK2_HUMAN	6	9	31.9	57.488	524	1912300000	111	68295000	1	1	0	1	9	11	1	20	21
DCTD	P32321	DCTD_HUMAN	+	cellpart							+																	Deoxycytidylate deaminase OS=Homo sapiens OX=9606 GN=DCTD PE=1 SV=2;Isoform 2 of Deoxycytidylate deaminase OS=Homo sapiens OX=9606 GN=DCTD	sp|P32321|DCTD_HUMAN;sp|P32321-2|DCTD_HUMAN	0.0015083	3.4496	sp|P32321|DCTD_HUMAN;sp|P32321-2|DCTD_HUMAN	2	5	52.8	20.016	178	245940000	24	22359000	0	1	0	0	4	4	0	8	8
ACSL1	P33121-2	ACSL1_HUMAN	+	cellmembrane							+																	Isoform 2 of Long-chain-fatty-acid--CoA ligase 1 OS=Homo sapiens OX=9606 GN=ACSL1;Long-chain-fatty-acid--CoA ligase 1 OS=Homo sapiens OX=9606 GN=ACSL1 PE=1 SV=1;Isoform 3 of Long-chain-fatty-acid--CoA ligase 1 OS=Homo sapiens OX=9606 GN=ACSL1	sp|P33121-2|ACSL1_HUMAN;sp|P33121|ACSL1_HUMAN;sp|P33121-3|ACSL1_HUMAN	0.0017341	6.5337	sp|P33121-2|ACSL1_HUMAN;sp|P33121|ACSL1_HUMAN;sp|P33121-3|ACSL1_HUMAN	3	5	16.6	76.87	688	86931000	34	2483700	0	1	0	0	3	2	0	5	5
KIF5B	P33176	KINH_HUMAN	+	cellpart							+																	Kinesin-1 heavy chain OS=Homo sapiens OX=9606 GN=KIF5B PE=1 SV=1	sp|P33176|KINH_HUMAN	0	261.11	sp|P33176|KINH_HUMAN	1	31	41.5	109.68	963	4506700000	737	77701000	1	1	9	9	12	12	18	24	42
LSP1	P33241-2	LSP1_HUMAN	+	cellmembrane			+		+																			Isoform 2 of Lymphocyte-specific protein 1 OS=Homo sapiens OX=9606 GN=LSP1;Lymphocyte-specific protein 1 OS=Homo sapiens OX=9606 GN=LSP1 PE=1 SV=1;Isoform 3 of Lymphocyte-specific protein 1 OS=Homo sapiens OX=9606 GN=LSP1	sp|P33241-2|LSP1_HUMAN;sp|P33241|LSP1_HUMAN;sp|P33241-3|LSP1_HUMAN	0.00065062	10.678	sp|P33241-2|LSP1_HUMAN;sp|P33241|LSP1_HUMAN;sp|P33241-3|LSP1_HUMAN	3	2	15.9	30.213	277	60686000	28	4668200	1	0	3	2	0	0	5	0	5
DUT	P33316	DUT_HUMAN	+	cellpart			+		+		+																	Deoxyuridine 5-triphosphate nucleotidohydrolase, mitochondrial OS=Homo sapiens OX=9606 GN=DUT PE=1 SV=4;Isoform 2 of Deoxyuridine 5-triphosphate nucleotidohydrolase, mitochondrial OS=Homo sapiens OX=9606 GN=DUT	sp|P33316|DUT_HUMAN;sp|P33316-2|DUT_HUMAN	0.0011848	7.2755	sp|P33316|DUT_HUMAN;sp|P33316-2|DUT_HUMAN	2	4	23.8	26.563	252	280090000	44	18672000	0	1	0	0	6	8	0	14	14
ABCC1	P33527-3	MRP1_HUMAN	+	cellmembrane			+		+		+																	Isoform 3 of Multidrug resistance-associated protein 1 OS=Homo sapiens OX=9606 GN=ABCC1;Multidrug resistance-associated protein 1 OS=Homo sapiens OX=9606 GN=ABCC1 PE=1 SV=3;Isoform 7 of Multidrug resistance-associated protein 1 OS=Homo sapiens OX=9606 GN=A	sp|P33527-3|MRP1_HUMAN;sp|P33527|MRP1_HUMAN;sp|P33527-7|MRP1_HUMAN;sp|P33527-4|MRP1_HUMAN;sp|P33527-9|MRP1_HUMAN;sp|P33527-5|MRP1_HUMAN;sp|P33527-2|MRP1_HUMAN;sp|P33527-8|MRP1_HUMAN;sp|P33527-6|MRP1_HUMAN	0	14.131	sp|P33527-3|MRP1_HUMAN;sp|P33527|MRP1_HUMAN;sp|P33527-7|MRP1_HUMAN;sp|P33527-4|MRP1_HUMAN;sp|P33527-9|MRP1_HUMAN;sp|P33527-5|MRP1_HUMAN;sp|P33527-2|MRP1_HUMAN;sp|P33527-8|MRP1_HUMAN;sp|P33527-6|MRP1_HUMAN	9	16	20.9	165.57	1475	398310000	66	5690100	1	1	1	0	9	9	1	18	19
ABCD1	P33897	ABCD1_HUMAN	+	cellmembrane							+																	ATP-binding cassette sub-family D member 1 OS=Homo sapiens OX=9606 GN=ABCD1 PE=1 SV=2	sp|P33897|ABCD1_HUMAN	0.0012019	7.7341	sp|P33897|ABCD1_HUMAN	1	4	8.7	82.936	745	100760000	19	2798800	0	1	0	0	1	1	0	2	2
SHMT2	P34897-3	GLYM_HUMAN	+	cellpart			+		+		+																	Isoform 3 of Serine hydroxymethyltransferase, mitochondrial OS=Homo sapiens OX=9606 GN=SHMT2;Serine hydroxymethyltransferase, mitochondrial OS=Homo sapiens OX=9606 GN=SHMT2 PE=1 SV=3;Isoform 2 of Serine hydroxymethyltransferase, mitochondrial OS=Homo sapie	sp|P34897-3|GLYM_HUMAN;sp|P34897|GLYM_HUMAN;sp|P34897-2|GLYM_HUMAN	0	172.32	sp|P34897-3|GLYM_HUMAN;sp|P34897|GLYM_HUMAN;sp|P34897-2|GLYM_HUMAN;sp|P34896-4|GLYC_HUMAN	4	29	71.6	53.454	483	4601200000	547	164330000	1	1	4	3	11	11	7	22	29
EPHX2	P34913	HYES_HUMAN	+	cellpart			+		+		+																	Bifunctional epoxide hydrolase 2 OS=Homo sapiens OX=9606 GN=EPHX2 PE=1 SV=2;Isoform 3 of Bifunctional epoxide hydrolase 2 OS=Homo sapiens OX=9606 GN=EPHX2;Isoform 2 of Bifunctional epoxide hydrolase 2 OS=Homo sapiens OX=9606 GN=EPHX2	sp|P34913|HYES_HUMAN;sp|P34913-3|HYES_HUMAN;sp|P34913-2|HYES_HUMAN	0	16.501	sp|P34913|HYES_HUMAN;sp|P34913-3|HYES_HUMAN;sp|P34913-2|HYES_HUMAN	3	7	29.7	62.615	555	224310000	41	7734900	0	1	0	0	2	3	0	5	5
HSPA4	P34932	HSP74_HUMAN	+	cellpart			+		+		+																	Heat shock 70 kDa protein 4 OS=Homo sapiens OX=9606 GN=HSPA4 PE=1 SV=4	sp|P34932|HSP74_HUMAN	0	240.04	sp|P34932|HSP74_HUMAN;sp|P34932-2|HSP74_HUMAN	2	37	62.7	94.33	840	8273100000	1013	165460000	1	1	5	6	12	12	11	24	35
CTNNB1	P35222	CTNB1_HUMAN	+	cellpart		Cell junction	+		+		+																	Catenin beta-1 OS=Homo sapiens OX=9606 GN=CTNNB1 PE=1 SV=1	sp|P35222|CTNB1_HUMAN	0.0016034	4.5509	sp|P35222|CTNB1_HUMAN	1	4	12.8	85.496	781	538810000	7	13142000	0	0	0	0	0	0	0	0	0
PHB	P35232	PHB_HUMAN	+	cellmembrane			+		+		+																	Prohibitin OS=Homo sapiens OX=9606 GN=PHB PE=1 SV=1	sp|P35232|PHB_HUMAN	0	323.31	sp|P35232|PHB_HUMAN;sp|P35232-2|PHB_HUMAN	2	27	88.2	29.804	272	42889000000	2535	2522900000	1	1	10	11	12	12	21	24	45
PTPN7	P35236	PTN7_HUMAN	+	cellpart							+																	Tyrosine-protein phosphatase non-receptor type 7 OS=Homo sapiens OX=9606 GN=PTPN7 PE=1 SV=3;Isoform 2 of Tyrosine-protein phosphatase non-receptor type 7 OS=Homo sapiens OX=9606 GN=PTPN7;Isoform 3 of Tyrosine-protein phosphatase non-receptor type 7 OS=Homo	sp|P35236|PTN7_HUMAN;sp|P35236-2|PTN7_HUMAN;sp|P35236-3|PTN7_HUMAN	0.0012121	7.9662	sp|P35236|PTN7_HUMAN;sp|P35236-2|PTN7_HUMAN;sp|P35236-3|PTN7_HUMAN	3	2	12.2	40.529	360	93706000	11	4931900	0	1	0	0	1	1	0	2	2
SERPINB6	P35237	SPB6_HUMAN	+	cellsurface			+		+		+																	Serpin B6 OS=Homo sapiens OX=9606 GN=SERPINB6 PE=1 SV=3	sp|P35237|SPB6_HUMAN	0	167.81	sp|P35237|SPB6_HUMAN	1	21	68.6	42.621	376	5808000000	875	276570000	1	1	6	7	12	12	13	24	37
RDX	P35241	RADI_HUMAN	+	cellmembrane		Endosome	+		+		+																	Radixin OS=Homo sapiens OX=9606 GN=RDX PE=1 SV=1;Isoform 5 of Radixin OS=Homo sapiens OX=9606 GN=RDX;Isoform 4 of Radixin OS=Homo sapiens OX=9606 GN=RDX	sp|P35241|RADI_HUMAN;sp|P35241-5|RADI_HUMAN;sp|P35241-4|RADI_HUMAN	0.0015584	4.0758	sp|P35241|RADI_HUMAN;sp|P35241-5|RADI_HUMAN;sp|P35241-4|RADI_HUMAN;sp|P35241-2|RADI_HUMAN	4	7	37.2	68.563	583	416690000	120	12627000	1	1	6	7	9	9	13	18	31
KRT9	P35527	K1C9_HUMAN	+	cellpart			+		+		+																+	Keratin, type I cytoskeletal 9 OS=Homo sapiens OX=9606 GN=KRT9 PE=1 SV=3;	sp|P35527|K1C9_HUMAN;CON__sp|P35527|K1C9_HUMAN	0	323.31	sp|P35527|K1C9_HUMAN;CON__sp|P35527|K1C9_HUMAN	2	56	95	62.064	623	49691000000	3713	1911200000	1	1	12	12	12	12	24	24	48
SAA4	P35542	SAA4_HUMAN	+	serum/plasma	other		+		+																			Serum amyloid A-4 protein OS=Homo sapiens OX=9606 GN=SAA4 PE=1 SV=2	sp|P35542|SAA4_HUMAN	0	323.31	sp|P35542|SAA4_HUMAN	1	12	78.5	14.746	130	143150000000	1103	20450000000	1	1	12	12	12	12	24	24	48
AGL	P35573-2	GDE_HUMAN	+	cellpart							+																	Isoform 5 of Glycogen debranching enzyme OS=Homo sapiens OX=9606 GN=AGL;Isoform 6 of Glycogen debranching enzyme OS=Homo sapiens OX=9606 GN=AGL;Glycogen debranching enzyme OS=Homo sapiens OX=9606 GN=AGL PE=1 SV=3	sp|P35573-2|GDE_HUMAN;sp|P35573-3|GDE_HUMAN;sp|P35573|GDE_HUMAN	0.0012188	8.2429	sp|P35573-2|GDE_HUMAN;sp|P35573-3|GDE_HUMAN;sp|P35573|GDE_HUMAN	3	8	10.5	172.62	1515	246660000	38	2835200	0	1	0	0	5	7	0	12	12
MYH9	P35579	MYH9_HUMAN	+	cellpart		focal adhesion	+		+		+																	Myosin-9 OS=Homo sapiens OX=9606 GN=MYH9 PE=1 SV=4	sp|P35579|MYH9_HUMAN	0	323.31	sp|P35579|MYH9_HUMAN	1	444	93.9	226.53	1960	15371000000000	109350	150690000000	1	1	12	12	12	12	24	24	48
MYH10	P35580	MYH10_HUMAN	+	cellpart			+		+		+																	Myosin-10 OS=Homo sapiens OX=9606 GN=MYH10 PE=1 SV=3;Isoform 5 of Myosin-10 OS=Homo sapiens OX=9606 GN=MYH10;Isoform 2 of Myosin-10 OS=Homo sapiens OX=9606 GN=MYH10;Isoform 3 of Myosin-10 OS=Homo sapiens OX=9606 GN=MYH10;Isoform 4 of Myosin-10 OS=Homo sapi	sp|P35580|MYH10_HUMAN;sp|P35580-5|MYH10_HUMAN;sp|P35580-2|MYH10_HUMAN;sp|P35580-3|MYH10_HUMAN;sp|P35580-4|MYH10_HUMAN	0	29.942	sp|P35580|MYH10_HUMAN;sp|P35580-5|MYH10_HUMAN;sp|P35580-2|MYH10_HUMAN;sp|P35580-3|MYH10_HUMAN;sp|P35580-4|MYH10_HUMAN	5	12	21.9	229	1976	3236000000	36	32360000	1	1	3	4	7	6	7	13	20
COPB2	P35606	COPB2_HUMAN	+	cellmembrane							+																	Coatomer subunit beta OS=Homo sapiens OX=9606 GN=COPB2 PE=1 SV=2;Isoform 2 of Coatomer subunit beta OS=Homo sapiens OX=9606 GN=COPB2	sp|P35606|COPB2_HUMAN;sp|P35606-2|COPB2_HUMAN	0	48.827	sp|P35606|COPB2_HUMAN;sp|P35606-2|COPB2_HUMAN	2	19	39.1	102.49	906	4304300000	437	93571000	1	1	4	4	11	11	8	22	30
ACTN2	P35609-2	ACTN2_HUMAN	+	cellpart		focal adhesion	+		+		+																	Isoform 2 of Alpha-actinin-2 OS=Homo sapiens OX=9606 GN=ACTN2;Alpha-actinin-2 OS=Homo sapiens OX=9606 GN=ACTN2 PE=1 SV=1	sp|P35609-2|ACTN2_HUMAN;sp|P35609|ACTN2_HUMAN	0.0017202	6.3119	sp|P35609-2|ACTN2_HUMAN;sp|P35609|ACTN2_HUMAN	2	3	24.3	103.92	894	315210000	12	5628800	0	1	0	0	2	1	0	3	3
ADD1	P35611-2	ADDA_HUMAN	+	cellpart		focal adhesion					+																	Isoform 2 of Alpha-adducin OS=Homo sapiens OX=9606 GN=ADD1;Isoform 6 of Alpha-adducin OS=Homo sapiens OX=9606 GN=ADD1;Alpha-adducin OS=Homo sapiens OX=9606 GN=ADD1 PE=1 SV=2;Isoform 3 of Alpha-adducin OS=Homo sapiens OX=9606 GN=ADD1;Isoform 4 of Alpha-addu	sp|P35611-2|ADDA_HUMAN;sp|P35611-6|ADDA_HUMAN;sp|P35611|ADDA_HUMAN;sp|P35611-3|ADDA_HUMAN;sp|P35611-4|ADDA_HUMAN;sp|P35611-5|ADDA_HUMAN	0	40.803	sp|P35611-2|ADDA_HUMAN;sp|P35611-6|ADDA_HUMAN;sp|P35611|ADDA_HUMAN;sp|P35611-3|ADDA_HUMAN;sp|P35611-4|ADDA_HUMAN;sp|P35611-5|ADDA_HUMAN	6	20	53.2	69.984	631	1850700000	407	71182000	1	1	7	7	11	12	14	23	37
ADD2	P35612	ADDB_HUMAN	+	cellpart																								Beta-adducin OS=Homo sapiens OX=9606 GN=ADD2 PE=1 SV=3;Isoform 2 of Beta-adducin OS=Homo sapiens OX=9606 GN=ADD2;Isoform 8 of Beta-adducin OS=Homo sapiens OX=9606 GN=ADD2;Isoform 9 of Beta-adducin OS=Homo sapiens OX=9606 GN=ADD2;Isoform 4 of Beta-adducin O	sp|P35612|ADDB_HUMAN;sp|P35612-2|ADDB_HUMAN;sp|P35612-8|ADDB_HUMAN;sp|P35612-9|ADDB_HUMAN;sp|P35612-4|ADDB_HUMAN;sp|P35612-3|ADDB_HUMAN	0.00065317	10.801	sp|P35612|ADDB_HUMAN;sp|P35612-2|ADDB_HUMAN;sp|P35612-8|ADDB_HUMAN;sp|P35612-9|ADDB_HUMAN;sp|P35612-4|ADDB_HUMAN;sp|P35612-3|ADDB_HUMAN;sp|P35612-5|ADDB_HUMAN;sp|P35612-6|ADDB_HUMAN;sp|P35612-7|ADDB_HUMAN	9	10	23	80.853	726	94842000	45	2634500	1	0	2	1	0	0	3	0	3
TIMP3	P35625	TIMP3_HUMAN	+	cellsurface							+																	Metalloproteinase inhibitor 3 OS=Homo sapiens OX=9606 GN=TIMP3 PE=1 SV=2	sp|P35625|TIMP3_HUMAN	0	52.203	sp|P35625|TIMP3_HUMAN	1	9	50.2	24.145	211	525200000	68	47745000	1	1	2	1	3	3	3	6	9
MYH11	P35749-4	MYH11_HUMAN	+	cellpart			+		+		+																	Isoform 4 of Myosin-11 OS=Homo sapiens OX=9606 GN=MYH11;Isoform 3 of Myosin-11 OS=Homo sapiens OX=9606 GN=MYH11;Myosin-11 OS=Homo sapiens OX=9606 GN=MYH11 PE=1 SV=3;Isoform 2 of Myosin-11 OS=Homo sapiens OX=9606 GN=MYH11	sp|P35749-4|MYH11_HUMAN;sp|P35749-3|MYH11_HUMAN;sp|P35749|MYH11_HUMAN;sp|P35749-2|MYH11_HUMAN	0	18.514	sp|P35749-4|MYH11_HUMAN;sp|P35749-3|MYH11_HUMAN;sp|P35749|MYH11_HUMAN;sp|P35749-2|MYH11_HUMAN	4	9	17.7	223.57	1938	5130500000	83	54005000	0	1	0	0	10	10	0	20	20
PPM1A	P35813-3	PPM1A_HUMAN	+	cellmembrane							+																	Isoform 3 of Protein phosphatase 1A OS=Homo sapiens OX=9606 GN=PPM1A;Protein phosphatase 1A OS=Homo sapiens OX=9606 GN=PPM1A PE=1 SV=1;Isoform Alpha-2 of Protein phosphatase 1A OS=Homo sapiens OX=9606 GN=PPM1A	sp|P35813-3|PPM1A_HUMAN;sp|P35813|PPM1A_HUMAN;sp|P35813-2|PPM1A_HUMAN	0	115.36	sp|P35813-3|PPM1A_HUMAN;sp|P35813|PPM1A_HUMAN;sp|P35813-2|PPM1A_HUMAN	3	21	61.8	51.366	455	7901100000	458	359140000	1	1	4	4	11	11	8	22	30
IGFALS	P35858	ALS_HUMAN	+	cellsurface			+		+		+																	Insulin-like growth factor-binding protein complex acid labile subunit OS=Homo sapiens OX=9606 GN=IGFALS PE=1 SV=1;Isoform 2 of Insulin-like growth factor-binding protein complex acid labile subunit OS=Homo sapiens OX=9606 GN=IGFALS	sp|P35858|ALS_HUMAN;sp|P35858-2|ALS_HUMAN	0	123.36	sp|P35858|ALS_HUMAN;sp|P35858-2|ALS_HUMAN	2	12	34.2	66.034	605	1475100000	327	61462000	1	1	11	10	10	11	21	21	42
KRT2	P35908	K22E_HUMAN	+	cellpart			+		+		+																+	Keratin, type II cytoskeletal 2 epidermal OS=Homo sapiens OX=9606 GN=KRT2 PE=1 SV=2;	sp|P35908|K22E_HUMAN;CON__sp|P35908|K22E_HUMAN	0	323.31	sp|P35908|K22E_HUMAN;CON__sp|P35908|K22E_HUMAN;sp|Q5XKE5|K2C79_HUMAN;sp|P12036-2|NFH_HUMAN;sp|P12036|NFH_HUMAN	5	47	87.3	65.432	639	17366000000	1825	445280000	1	1	12	12	11	11	24	22	46
HMGCL	P35914	HMGCL_HUMAN	+	cellpart							+																	Hydroxymethylglutaryl-CoA lyase, mitochondrial OS=Homo sapiens OX=9606 GN=HMGCL PE=1 SV=2;Isoform 3 of Hydroxymethylglutaryl-CoA lyase, mitochondrial OS=Homo sapiens OX=9606 GN=HMGCL;Isoform 2 of Hydroxymethylglutaryl-CoA lyase, mitochondrial OS=Homo sapie	sp|P35914|HMGCL_HUMAN;sp|P35914-3|HMGCL_HUMAN;sp|P35914-2|HMGCL_HUMAN	0	60.828	sp|P35914|HMGCL_HUMAN;sp|P35914-3|HMGCL_HUMAN;sp|P35914-2|HMGCL_HUMAN	3	13	37.5	34.36	325	2303800000	284	143990000	1	1	2	3	11	11	5	22	27
PSMC2	P35998	PRS7_HUMAN	+	cellpart							+																	26S proteasome regulatory subunit 7 OS=Homo sapiens OX=9606 GN=PSMC2 PE=1 SV=3;Isoform 2 of 26S proteasome regulatory subunit 7 OS=Homo sapiens OX=9606 GN=PSMC2	sp|P35998|PRS7_HUMAN;sp|P35998-2|PRS7_HUMAN	0	22.059	sp|P35998|PRS7_HUMAN;sp|P35998-2|PRS7_HUMAN	2	8	27.9	48.633	433	552770000	107	21260000	1	1	1	2	9	10	3	19	22
ATP5F1C	P36542	ATPG_HUMAN	+	cellmembrane							+																	ATP synthase subunit gamma, mitochondrial OS=Homo sapiens OX=9606 GN=ATP5F1C PE=1 SV=1;Isoform Heart of ATP synthase subunit gamma, mitochondrial OS=Homo sapiens OX=9606 GN=ATP5F1C	sp|P36542|ATPG_HUMAN;sp|P36542-2|ATPG_HUMAN	0	106.63	sp|P36542|ATPG_HUMAN;sp|P36542-2|ATPG_HUMAN	2	16	63.8	32.996	298	13239000000	906	1103200000	1	1	10	11	12	12	21	24	45
ATP6V1E1	P36543	VATE1_HUMAN	+	cellmembrane			+		+		+																	V-type proton ATPase subunit E 1 OS=Homo sapiens OX=9606 GN=ATP6V1E1 PE=1 SV=1;Isoform 3 of V-type proton ATPase subunit E 1 OS=Homo sapiens OX=9606 GN=ATP6V1E1	sp|P36543|VATE1_HUMAN;sp|P36543-3|VATE1_HUMAN	0	33.042	sp|P36543|VATE1_HUMAN;sp|P36543-3|VATE1_HUMAN;sp|Q96A05|VATE2_HUMAN	3	11	62.4	26.145	226	1486900000	190	114380000	1	1	4	2	10	10	6	20	26
CPOX	P36551	HEM6_HUMAN	+	cellpart							+																	Oxygen-dependent coproporphyrinogen-III oxidase, mitochondrial OS=Homo sapiens OX=9606 GN=CPOX PE=1 SV=3;Isoform 2 of Oxygen-dependent coproporphyrinogen-III oxidase, mitochondrial OS=Homo sapiens OX=9606 GN=CPOX	sp|P36551|HEM6_HUMAN;sp|P36551-2|HEM6_HUMAN	0.0073699	2.0417	sp|P36551|HEM6_HUMAN;sp|P36551-2|HEM6_HUMAN	2	6	31.3	50.151	454	253820000	30	9400800	1	1	2	1	3	4	3	7	10
LONP1	P36776-3	LONM_HUMAN	+	cellpart							+																	Isoform 3 of Lon protease homolog, mitochondrial OS=Homo sapiens OX=9606 GN=LONP1;Isoform 2 of Lon protease homolog, mitochondrial OS=Homo sapiens OX=9606 GN=LONP1;Lon protease homolog, mitochondrial OS=Homo sapiens OX=9606 GN=LONP1 PE=1 SV=2	sp|P36776-3|LONM_HUMAN;sp|P36776-2|LONM_HUMAN;sp|P36776|LONM_HUMAN	0	52.658	sp|P36776-3|LONM_HUMAN;sp|P36776-2|LONM_HUMAN;sp|P36776|LONM_HUMAN	3	10	29.4	85.64	763	1151600000	176	33871000	1	1	2	2	8	9	4	17	21
PGM1	P36871	PGM1_HUMAN	+	cellpart			+		+		+																	Phosphoglucomutase-1 OS=Homo sapiens OX=9606 GN=PGM1 PE=1 SV=3;Isoform 2 of Phosphoglucomutase-1 OS=Homo sapiens OX=9606 GN=PGM1;Isoform 3 of Phosphoglucomutase-1 OS=Homo sapiens OX=9606 GN=PGM1	sp|P36871|PGM1_HUMAN;sp|P36871-2|PGM1_HUMAN;sp|P36871-3|PGM1_HUMAN	0	147.04	sp|P36871|PGM1_HUMAN;sp|P36871-2|PGM1_HUMAN;sp|P36871-3|PGM1_HUMAN	3	28	69.9	61.448	562	7911400000	918	239740000	1	1	8	8	12	12	16	24	40
PPP1CC	P36873	PP1G_HUMAN	+	cellpart		focal adhesion					+																	Serine/threonine-protein phosphatase PP1-gamma catalytic subunit OS=Homo sapiens OX=9606 GN=PPP1CC PE=1 SV=1;Isoform 2 of Serine/threonine-protein phosphatase PP1-gamma catalytic subunit OS=Homo sapiens OX=9606 GN=PPP1CC	sp|P36873|PP1G_HUMAN;sp|P36873-2|PP1G_HUMAN	0	33.365	sp|P36873|PP1G_HUMAN;sp|P36873-2|PP1G_HUMAN	2	3	65.6	36.983	323	1962200000	204	115420000	1	1	6	6	11	12	12	23	35
SERPINF1	P36955	PEDF_HUMAN	+	cellsurface			+		+		+																	Pigment epithelium-derived factor OS=Homo sapiens OX=9606 GN=SERPINF1 PE=1 SV=4	sp|P36955|PEDF_HUMAN	0	90.852	sp|P36955|PEDF_HUMAN	1	20	63.6	46.312	418	5093700000	684	242560000	1	1	9	9	12	12	18	24	42
DLST	P36957	ODO2_HUMAN	+	cellpart							+																	Dihydrolipoyllysine-residue succinyltransferase component of 2-oxoglutarate dehydrogenase complex, mitochondrial OS=Homo sapiens OX=9606 GN=DLST PE=1 SV=4;Isoform 2 of Dihydrolipoyllysine-residue succinyltransferase component of 2-oxoglutarate dehydrogenas	sp|P36957|ODO2_HUMAN;sp|P36957-2|ODO2_HUMAN	0	38.994	sp|P36957|ODO2_HUMAN;sp|P36957-2|ODO2_HUMAN	2	14	58.1	48.755	453	4552000000	305	216760000	1	1	1	0	11	11	1	22	23
GMPR	P36959	GMPR1_HUMAN	+	cellpart							+																	GMP reductase 1 OS=Homo sapiens OX=9606 GN=GMPR PE=1 SV=1	sp|P36959|GMPR1_HUMAN	0	196.15	sp|P36959|GMPR1_HUMAN	1	15	76.8	37.418	345	7325300000	785	430900000	1	1	10	10	12	12	20	24	44
GPX4	P36969-2	GPX4_HUMAN	+	cellpart			+		+		+																	Isoform Cytoplasmic of Phospholipid hydroperoxide glutathione peroxidase OS=Homo sapiens OX=9606 GN=GPX4;Phospholipid hydroperoxide glutathione peroxidase OS=Homo sapiens OX=9606 GN=GPX4 PE=1 SV=3	sp|P36969-2|GPX4_HUMAN;sp|P36969|GPX4_HUMAN	0.0099278	1.7935	sp|P36969-2|GPX4_HUMAN;sp|P36969|GPX4_HUMAN	2	8	55.3	19.525	170	541320000	33	49211000	1	1	1	0	5	6	1	11	12
CFHR2	P36980	FHR2_HUMAN	+	serum/plasma	compl						+																	Complement factor H-related protein 2 OS=Homo sapiens OX=9606 GN=CFHR2 PE=1 SV=1;Isoform Short of Complement factor H-related protein 2 OS=Homo sapiens OX=9606 GN=CFHR2	sp|P36980|FHR2_HUMAN;sp|P36980-2|FHR2_HUMAN	0	12.593	sp|P36980|FHR2_HUMAN;sp|P36980-2|FHR2_HUMAN	2	6	72.6	30.65	270	3298200000	287	235590000	1	1	9	8	12	12	17	24	41
HPCAL1	P37235	HPCL1_HUMAN	+	cellpart							+																	Hippocalcin-like protein 1 OS=Homo sapiens OX=9606 GN=HPCAL1 PE=1 SV=3	sp|P37235|HPCL1_HUMAN	0.001548	3.9316	sp|P37235|HPCL1_HUMAN;sp|P61601|NCALD_HUMAN	2	4	20.2	22.313	193	837530000	102	55835000	1	1	2	2	8	9	4	17	21
FDFT1	P37268	FDFT_HUMAN	+	cellmembrane																								Squalene synthase OS=Homo sapiens OX=9606 GN=FDFT1 PE=1 SV=1;Isoform 4 of Squalene synthase OS=Homo sapiens OX=9606 GN=FDFT1;Isoform 3 of Squalene synthase OS=Homo sapiens OX=9606 GN=FDFT1;Isoform 2 of Squalene synthase OS=Homo sapiens OX=9606 GN=FDFT1;Iso	sp|P37268|FDFT_HUMAN;sp|P37268-4|FDFT_HUMAN;sp|P37268-3|FDFT_HUMAN;sp|P37268-2|FDFT_HUMAN;sp|P37268-5|FDFT_HUMAN	0.0073733	2.0426	sp|P37268|FDFT_HUMAN;sp|P37268-4|FDFT_HUMAN;sp|P37268-3|FDFT_HUMAN;sp|P37268-2|FDFT_HUMAN;sp|P37268-5|FDFT_HUMAN	5	2	6.5	48.115	417	10559000	5	479940	0	0	0	0	0	0	0	0	0
TAGLN2	P37802	TAGL2_HUMAN	+	cellpart			+		+		+																	Transgelin-2 OS=Homo sapiens OX=9606 GN=TAGLN2 PE=1 SV=3;Isoform 2 of Transgelin-2 OS=Homo sapiens OX=9606 GN=TAGLN2	sp|P37802|TAGL2_HUMAN;sp|P37802-2|TAGL2_HUMAN	0	323.31	sp|P37802|TAGL2_HUMAN;sp|P37802-2|TAGL2_HUMAN	2	39	98	22.391	199	426800000000	7949	30485000000	1	1	12	12	12	12	24	24	48
TALDO1	P37837	TALDO_HUMAN	+	cellpart			+		+		+																	Transaldolase OS=Homo sapiens OX=9606 GN=TALDO1 PE=1 SV=2	sp|P37837|TALDO_HUMAN	0	34.129	sp|P37837|TALDO_HUMAN	1	19	44.5	37.54	337	12722000000	823	795120000	1	1	10	11	12	12	21	24	45
SNCA	P37840-2	SYUA_HUMAN	+	cellpart		Cell junction					+																	Isoform 2-4 of Alpha-synuclein OS=Homo sapiens OX=9606 GN=SNCA;Alpha-synuclein OS=Homo sapiens OX=9606 GN=SNCA PE=1 SV=1;Isoform 2-5 of Alpha-synuclein OS=Homo sapiens OX=9606 GN=SNCA	sp|P37840-2|SYUA_HUMAN;sp|P37840|SYUA_HUMAN;sp|P37840-3|SYUA_HUMAN	0	25.147	sp|P37840-2|SYUA_HUMAN;sp|P37840|SYUA_HUMAN;sp|P37840-3|SYUA_HUMAN;sp|Q16143|SYUB_HUMAN	4	9	69.6	11.372	112	2216600000	255	316650000	1	1	10	10	11	11	20	22	42
ETFB	P38117	ETFB_HUMAN	+	cellpart							+																	Electron transfer flavoprotein subunit beta OS=Homo sapiens OX=9606 GN=ETFB PE=1 SV=3;Isoform 2 of Electron transfer flavoprotein subunit beta OS=Homo sapiens OX=9606 GN=ETFB	sp|P38117|ETFB_HUMAN;sp|P38117-2|ETFB_HUMAN	0	173.6	sp|P38117|ETFB_HUMAN;sp|P38117-2|ETFB_HUMAN	2	18	72.5	27.843	255	10785000000	810	770380000	1	1	10	9	11	11	19	22	41
ATP6V1A	P38606	VATA_HUMAN	+	cellpart			+		+		+																	V-type proton ATPase catalytic subunit A OS=Homo sapiens OX=9606 GN=ATP6V1A PE=1 SV=2;Isoform 2 of V-type proton ATPase catalytic subunit A OS=Homo sapiens OX=9606 GN=ATP6V1A	sp|P38606|VATA_HUMAN;sp|P38606-2|VATA_HUMAN	0	152.42	sp|P38606|VATA_HUMAN;sp|P38606-2|VATA_HUMAN	2	33	84.6	68.303	617	14985000000	1582	454080000	1	1	11	11	12	12	22	24	46
HSPA9	P38646	GRP75_HUMAN	+	cellpart		focal adhesion	+		+		+																	Stress-70 protein, mitochondrial OS=Homo sapiens OX=9606 GN=HSPA9 PE=1 SV=2	sp|P38646|GRP75_HUMAN	0	323.31	sp|P38646|GRP75_HUMAN	1	43	66.7	73.68	679	53930000000	3461	1419200000	1	1	10	11	12	12	21	24	45
COL18A1	P39060	COIA1_HUMAN	+	cellsurface			+		+																			Collagen alpha-1(XVIII) chain OS=Homo sapiens OX=9606 GN=COL18A1 PE=1 SV=5;Isoform 2 of Collagen alpha-1(XVIII) chain OS=Homo sapiens OX=9606 GN=COL18A1;Isoform 3 of Collagen alpha-1(XVIII) chain OS=Homo sapiens OX=9606 GN=COL18A1	sp|P39060|COIA1_HUMAN;sp|P39060-1|COIA1_HUMAN;sp|P39060-2|COIA1_HUMAN	0	19.878	sp|P39060|COIA1_HUMAN;sp|P39060-1|COIA1_HUMAN;sp|P39060-2|COIA1_HUMAN	3	7	10	178.19	1754	580600000	71	11165000	1	1	6	5	1	1	11	2	13
MPV17	P39210	MPV17_HUMAN	+	cellmembrane																								Protein Mpv17 OS=Homo sapiens OX=9606 GN=MPV17 PE=1 SV=1	sp|P39210|MPV17_HUMAN	0	91.188	sp|P39210|MPV17_HUMAN	1	4	44.9	19.733	176	950950000	145	135850000	1	1	1	1	10	11	2	21	23
DDOST	P39656	OST48_HUMAN	+	cellmembrane							+																	Dolichyl-diphosphooligosaccharide--protein glycosyltransferase 48 kDa subunit OS=Homo sapiens OX=9606 GN=DDOST PE=1 SV=4;Isoform 2 of Dolichyl-diphosphooligosaccharide--protein glycosyltransferase 48 kDa subunit OS=Homo sapiens OX=9606 GN=DDOST;Isoform 3 o	sp|P39656|OST48_HUMAN;sp|P39656-2|OST48_HUMAN;sp|P39656-3|OST48_HUMAN	0	197.4	sp|P39656|OST48_HUMAN;sp|P39656-2|OST48_HUMAN;sp|P39656-3|OST48_HUMAN	3	17	55.7	50.8	456	19812000000	1168	990590000	1	1	11	10	12	12	21	24	45
CCT6A	P40227	TCPZ_HUMAN	+	cellpart			+		+		+																	T-complex protein 1 subunit zeta OS=Homo sapiens OX=9606 GN=CCT6A PE=1 SV=3;Isoform 2 of T-complex protein 1 subunit zeta OS=Homo sapiens OX=9606 GN=CCT6A	sp|P40227|TCPZ_HUMAN;sp|P40227-2|TCPZ_HUMAN	0	180.66	sp|P40227|TCPZ_HUMAN;sp|P40227-2|TCPZ_HUMAN	2	36	75.9	58.024	531	17057000000	1711	656050000	1	1	10	10	12	12	20	24	44
PSMB10	P40306	PSB10_HUMAN	+	cellpart							+																	Proteasome subunit beta type-10 OS=Homo sapiens OX=9606 GN=PSMB10 PE=1 SV=1	sp|P40306|PSB10_HUMAN	0.00063654	9.8438	sp|P40306|PSB10_HUMAN	1	4	35.2	28.936	273	456340000	66	50704000	1	1	2	2	8	9	4	17	21
ARL1	P40616-2	ARL1_HUMAN	+	cellmembrane		Endosome					+																	Isoform 2 of ADP-ribosylation factor-like protein 1 OS=Homo sapiens OX=9606 GN=ARL1;ADP-ribosylation factor-like protein 1 OS=Homo sapiens OX=9606 GN=ARL1 PE=1 SV=1	sp|P40616-2|ARL1_HUMAN;sp|P40616|ARL1_HUMAN	0.0017432	6.6751	sp|P40616-2|ARL1_HUMAN;sp|P40616|ARL1_HUMAN	2	4	40.9	18.565	164	377160000	63	47145000	0	1	0	0	9	8	0	17	17
STAT3	P40763-3	STAT3_HUMAN	+	cellpart							+																	Isoform 3 of Signal transducer and activator of transcription 3 OS=Homo sapiens OX=9606 GN=STAT3;Signal transducer and activator of transcription 3 OS=Homo sapiens OX=9606 GN=STAT3 PE=1 SV=2	sp|P40763-3|STAT3_HUMAN;sp|P40763|STAT3_HUMAN	0	312.06	sp|P40763-3|STAT3_HUMAN;sp|P40763|STAT3_HUMAN	2	29	64.4	83.125	722	6691000000	781	171560000	1	1	5	5	11	11	10	22	32
MDH1	P40925-3	MDHC_HUMAN	+	cellpart			+		+		+																	Isoform 3 of Malate dehydrogenase, cytoplasmic OS=Homo sapiens OX=9606 GN=MDH1;Malate dehydrogenase, cytoplasmic OS=Homo sapiens OX=9606 GN=MDH1 PE=1 SV=4;Isoform 2 of Malate dehydrogenase, cytoplasmic OS=Homo sapiens OX=9606 GN=MDH1	sp|P40925-3|MDHC_HUMAN;sp|P40925|MDHC_HUMAN;sp|P40925-2|MDHC_HUMAN	0	117.41	sp|P40925-3|MDHC_HUMAN;sp|P40925|MDHC_HUMAN;sp|P40925-2|MDHC_HUMAN	3	18	61.4	38.627	352	22489000000	1391	1405500000	1	1	10	10	12	12	20	24	44
MDH2	P40926	MDHM_HUMAN	+	cellpart			+		+		+																	Malate dehydrogenase, mitochondrial OS=Homo sapiens OX=9606 GN=MDH2 PE=1 SV=3;Isoform 2 of Malate dehydrogenase, mitochondrial OS=Homo sapiens OX=9606 GN=MDH2	sp|P40926|MDHM_HUMAN;sp|P40926-2|MDHM_HUMAN	0	323.31	sp|P40926|MDHM_HUMAN;sp|P40926-2|MDHM_HUMAN	2	31	86.4	35.503	338	137220000000	4841	6860800000	1	1	12	12	12	12	24	24	48
HADHA	P40939	ECHA_HUMAN	+	cellpart							+																	Trifunctional enzyme subunit alpha, mitochondrial OS=Homo sapiens OX=9606 GN=HADHA PE=1 SV=2	sp|P40939|ECHA_HUMAN	0	323.31	sp|P40939|ECHA_HUMAN;sp|P40939-2|ECHA_HUMAN	2	54	80.2	82.999	763	37173000000	3080	929320000	1	1	10	11	12	12	21	24	45
EIF2S3	P41091	IF2G_HUMAN	+	cellpart			+		+		+																	Eukaryotic translation initiation factor 2 subunit 3 OS=Homo sapiens OX=9606 GN=EIF2S3 PE=1 SV=3;Eukaryotic translation initiation factor 2 subunit 3B OS=Homo sapiens OX=9606 GN=EIF2S3B PE=2 SV=2;Isoform 2 of Eukaryotic translation initiation factor 2 subu	sp|P41091|IF2G_HUMAN;sp|Q2VIR3|IF2GL_HUMAN;sp|Q2VIR3-2|IF2GL_HUMAN	0	54.35	sp|P41091|IF2G_HUMAN;sp|Q2VIR3|IF2GL_HUMAN;sp|Q2VIR3-2|IF2GL_HUMAN	3	10	33.1	51.109	472	2393400000	224	104060000	1	1	5	6	8	10	11	18	29
UBA7	P41226	UBA7_HUMAN	+	cellpart							+																	Ubiquitin-like modifier-activating enzyme 7 OS=Homo sapiens OX=9606 GN=UBA7 PE=1 SV=2	sp|P41226|UBA7_HUMAN	0	147.55	sp|P41226|UBA7_HUMAN	1	30	62.2	111.69	1012	5389400000	734	131450000	1	1	7	7	12	12	14	24	38
CSK	P41240	CSK_HUMAN	+	cellpart		Cell junction	+		+		+																	Tyrosine-protein kinase CSK OS=Homo sapiens OX=9606 GN=CSK PE=1 SV=1	sp|P41240|CSK_HUMAN	0	38.66	sp|P41240|CSK_HUMAN;sp|P42679-3|MATK_HUMAN;sp|P42679|MATK_HUMAN;sp|P42679-2|MATK_HUMAN	4	18	54.4	50.704	450	5362800000	638	198620000	1	1	8	7	11	11	15	22	37
GARS	P41250	GARS_HUMAN	+	cellpart			+		+																			Glycine--tRNA ligase OS=Homo sapiens OX=9606 GN=GARS PE=1 SV=3	sp|P41250|GARS_HUMAN	0	171.81	sp|P41250|GARS_HUMAN	1	25	44.5	83.165	739	4569400000	744	111450000	1	1	9	8	12	12	17	24	41
ACTR1B	P42025	ACTY_HUMAN	+	cellpart			+		+		+																	Beta-centractin OS=Homo sapiens OX=9606 GN=ACTR1B PE=1 SV=1	sp|P42025|ACTY_HUMAN	0	12.74	sp|P42025|ACTY_HUMAN	1	5	51.6	42.293	376	2550600000	367	134240000	1	1	8	10	12	12	18	24	42
STAT1	P42224-2	STAT1_HUMAN	+	cellpart							+																	Isoform Beta of Signal transducer and activator of transcription 1-alpha/beta OS=Homo sapiens OX=9606 GN=STAT1;Signal transducer and activator of transcription 1-alpha/beta OS=Homo sapiens OX=9606 GN=STAT1 PE=1 SV=2	sp|P42224-2|STAT1_HUMAN;sp|P42224|STAT1_HUMAN	0.0012026	7.741	sp|P42224-2|STAT1_HUMAN;sp|P42224|STAT1_HUMAN	2	6	13.9	83.042	712	195780000	28	5291400	0	1	0	0	3	4	0	7	7
PIK3CB	P42338	PK3CB_HUMAN	+	cellpart							+																	Phosphatidylinositol 4,5-bisphosphate 3-kinase catalytic subunit beta isoform OS=Homo sapiens OX=9606 GN=PIK3CB PE=1 SV=1	sp|P42338|PK3CB_HUMAN	0	14.107	sp|P42338|PK3CB_HUMAN	1	4	7	122.76	1070	76276000	39	1386800	1	1	0	1	3	4	1	7	8
PI4KA	P42356	PI4KA_HUMAN	+	cellpart		focal adhesion	+		+		+																	Phosphatidylinositol 4-kinase alpha OS=Homo sapiens OX=9606 GN=PI4KA PE=1 SV=4	sp|P42356|PI4KA_HUMAN	0.001569	4.1977	sp|P42356|PI4KA_HUMAN	1	7	4.9	236.83	2102	208070000	22	1778400	0	1	0	0	3	2	0	5	5
EPS15	P42566	EPS15_HUMAN	+	cellpart		Endosome					+																	Epidermal growth factor receptor substrate 15 OS=Homo sapiens OX=9606 GN=EPS15 PE=1 SV=2;Isoform 2 of Epidermal growth factor receptor substrate 15 OS=Homo sapiens OX=9606 GN=EPS15	sp|P42566|EPS15_HUMAN;sp|P42566-2|EPS15_HUMAN	0	113.16	sp|P42566|EPS15_HUMAN;sp|P42566-2|EPS15_HUMAN	2	11	19.4	98.655	896	1240400000	162	26965000	1	1	1	1	9	9	2	18	20
CASP3	P42574	CASP3_HUMAN	+	cellpart							+																	Caspase-3 OS=Homo sapiens OX=9606 GN=CASP3 PE=1 SV=2	sp|P42574|CASP3_HUMAN	0	18.503	sp|P42574|CASP3_HUMAN	1	11	49.5	31.608	277	961840000	127	64123000	1	1	4	4	10	10	8	20	28
LRPPRC	P42704	LPPRC_HUMAN	+	cellpart							+																	Leucine-rich PPR motif-containing protein, mitochondrial OS=Homo sapiens OX=9606 GN=LRPPRC PE=1 SV=3	sp|P42704|LPPRC_HUMAN	0	18.006	sp|P42704|LPPRC_HUMAN	1	12	15.6	157.9	1394	208620000	40	2370700	0	1	0	0	3	2	0	5	5
ACAA2	P42765	THIM_HUMAN	+	cellpart							+																	3-ketoacyl-CoA thiolase, mitochondrial OS=Homo sapiens OX=9606 GN=ACAA2 PE=1 SV=2	sp|P42765|THIM_HUMAN	0	52.801	sp|P42765|THIM_HUMAN	1	12	52.1	41.924	397	840150000	190	42008000	1	1	2	0	9	10	2	19	21
WAS	P42768	WASP_HUMAN	+	cellpart		Cell junction	+		+		+																	Wiskott-Aldrich syndrome protein OS=Homo sapiens OX=9606 GN=WAS PE=1 SV=4	sp|P42768|WASP_HUMAN	0	20.819	sp|P42768|WASP_HUMAN	1	11	43.8	52.912	502	3022500000	216	143930000	1	1	6	8	12	12	14	24	38
HTT	P42858	HD_HUMAN	+	cellpart							+																	Huntingtin OS=Homo sapiens OX=9606 GN=HTT PE=1 SV=2	sp|P42858|HD_HUMAN	0.0011976	7.6611	sp|P42858|HD_HUMAN	1	9	5.7	347.6	3142	192380000	69	1354800	1	1	1	1	8	8	2	16	18
ECE1	P42892-4	ECE1_HUMAN	+	cellmembrane			+		+		+																	Isoform D of Endothelin-converting enzyme 1 OS=Homo sapiens OX=9606 GN=ECE1;Isoform C of Endothelin-converting enzyme 1 OS=Homo sapiens OX=9606 GN=ECE1;Endothelin-converting enzyme 1 OS=Homo sapiens OX=9606 GN=ECE1 PE=1 SV=2;Isoform A of Endothelin-convert	sp|P42892-4|ECE1_HUMAN;sp|P42892-3|ECE1_HUMAN;sp|P42892|ECE1_HUMAN;sp|P42892-2|ECE1_HUMAN	0	323.31	sp|P42892-4|ECE1_HUMAN;sp|P42892-3|ECE1_HUMAN;sp|P42892|ECE1_HUMAN;sp|P42892-2|ECE1_HUMAN	4	26	45.5	87.021	767	11447000000	1317	279210000	1	1	9	10	12	12	19	24	43
PAFAH1B1	P43034	LIS1_HUMAN	+	cellpart			+		+		+																	Platelet-activating factor acetylhydrolase IB subunit alpha OS=Homo sapiens OX=9606 GN=PAFAH1B1 PE=1 SV=2	sp|P43034|LIS1_HUMAN	0	89.419	sp|P43034|LIS1_HUMAN;sp|P43034-2|LIS1_HUMAN	2	11	37.1	46.637	410	1701700000	278	70905000	1	1	6	6	11	11	12	22	34
PTGIR	P43119	PI2R_HUMAN	+	cellmembrane							+																	Prostacyclin receptor OS=Homo sapiens OX=9606 GN=PTGIR PE=1 SV=1	sp|P43119|PI2R_HUMAN	0.0016704	5.6261	sp|P43119|PI2R_HUMAN	1	2	16.8	40.956	386	44400000	8	4440000	0	1	0	0	0	1	0	1	1
CRAT	P43155	CACP_HUMAN	+	cellmembrane							+																	Carnitine O-acetyltransferase OS=Homo sapiens OX=9606 GN=CRAT PE=1 SV=5;Isoform 2 of Carnitine O-acetyltransferase OS=Homo sapiens OX=9606 GN=CRAT;Isoform 3 of Carnitine O-acetyltransferase OS=Homo sapiens OX=9606 GN=CRAT	sp|P43155|CACP_HUMAN;sp|P43155-2|CACP_HUMAN;sp|P43155-3|CACP_HUMAN	0.0016278	4.9886	sp|P43155|CACP_HUMAN;sp|P43155-2|CACP_HUMAN;sp|P43155-3|CACP_HUMAN	3	5	14.1	70.857	626	557320000	128	20641000	1	1	3	4	10	11	7	21	28
GPD2	P43304	GPDM_HUMAN	+	cellpart							+																	Glycerol-3-phosphate dehydrogenase, mitochondrial OS=Homo sapiens OX=9606 GN=GPD2 PE=1 SV=3;Isoform 2 of Glycerol-3-phosphate dehydrogenase, mitochondrial OS=Homo sapiens OX=9606 GN=GPD2	sp|P43304|GPDM_HUMAN;sp|P43304-2|GPDM_HUMAN	0	323.31	sp|P43304|GPDM_HUMAN;sp|P43304-2|GPDM_HUMAN	2	61	80.9	80.852	727	108640000000	5201	2586700000	1	1	11	12	12	12	23	24	47
SSR1	P43307	SSRA_HUMAN	+	cellmembrane							+																	Translocon-associated protein subunit alpha OS=Homo sapiens OX=9606 GN=SSR1 PE=1 SV=3;Isoform 2 of Translocon-associated protein subunit alpha OS=Homo sapiens OX=9606 GN=SSR1	sp|P43307|SSRA_HUMAN;sp|P43307-2|SSRA_HUMAN	0	55.791	sp|P43307|SSRA_HUMAN;sp|P43307-2|SSRA_HUMAN	2	4	21	32.235	286	893670000	117	99297000	1	1	3	5	8	9	8	17	25
SYK	P43405-2	KSYK_HUMAN	+	cellmembrane							+																	Isoform Short of Tyrosine-protein kinase SYK OS=Homo sapiens OX=9606 GN=SYK;Tyrosine-protein kinase SYK OS=Homo sapiens OX=9606 GN=SYK PE=1 SV=1	sp|P43405-2|KSYK_HUMAN;sp|P43405|KSYK_HUMAN	0	32.608	sp|P43405-2|KSYK_HUMAN;sp|P43405|KSYK_HUMAN	2	10	28.9	69.509	612	1476000000	309	42172000	1	1	7	8	11	12	15	23	38
RANBP1	P43487-2	RANG_HUMAN	+	cellpart							+																	Isoform 2 of Ran-specific GTPase-activating protein OS=Homo sapiens OX=9606 GN=RANBP1;Ran-specific GTPase-activating protein OS=Homo sapiens OX=9606 GN=RANBP1 PE=1 SV=1	sp|P43487-2|RANG_HUMAN;sp|P43487|RANG_HUMAN	0.00064809	10.518	sp|P43487-2|RANG_HUMAN;sp|P43487|RANG_HUMAN	2	6	51	23.239	200	948620000	97	158100000	1	1	3	3	8	6	6	14	20
AFM	P43652	AFAM_HUMAN	+	cellsurface			+	+	+	+	+																	Afamin OS=Homo sapiens OX=9606 GN=AFM PE=1 SV=1	sp|P43652|AFAM_HUMAN	0	323.31	sp|P43652|AFAM_HUMAN	1	32	57.6	69.068	599	15564000000	1840	420660000	1	1	12	12	12	12	24	24	48
PSMC4	P43686	PRS6B_HUMAN	+	cellpart							+																	26S proteasome regulatory subunit 6B OS=Homo sapiens OX=9606 GN=PSMC4 PE=1 SV=2;Isoform 2 of 26S proteasome regulatory subunit 6B OS=Homo sapiens OX=9606 GN=PSMC4	sp|P43686|PRS6B_HUMAN;sp|P43686-2|PRS6B_HUMAN	0	38.553	sp|P43686|PRS6B_HUMAN;sp|P43686-2|PRS6B_HUMAN	2	8	33	47.366	418	454560000	101	21646000	1	1	3	2	8	10	5	18	23
TSFM	P43897	EFTS_HUMAN	+	cellpart							+																	Elongation factor Ts, mitochondrial OS=Homo sapiens OX=9606 GN=TSFM PE=1 SV=2;Isoform 2 of Elongation factor Ts, mitochondrial OS=Homo sapiens OX=9606 GN=TSFM	sp|P43897|EFTS_HUMAN;sp|P43897-2|EFTS_HUMAN	0.0015957	4.5037	sp|P43897|EFTS_HUMAN;sp|P43897-2|EFTS_HUMAN	2	2	12.3	35.39	325	22136000	5	1229800	0	1	0	0	1	0	0	1	1
VDAC2	P45880	VDAC2_HUMAN	+	cellmembrane							+																	Voltage-dependent anion-selective channel protein 2 OS=Homo sapiens OX=9606 GN=VDAC2 PE=1 SV=2;Isoform 2 of Voltage-dependent anion-selective channel protein 2 OS=Homo sapiens OX=9606 GN=VDAC2;Isoform 1 of Voltage-dependent anion-selective channel protein	sp|P45880|VDAC2_HUMAN;sp|P45880-2|VDAC2_HUMAN;sp|P45880-1|VDAC2_HUMAN	0	323.31	sp|P45880|VDAC2_HUMAN;sp|P45880-2|VDAC2_HUMAN;sp|P45880-1|VDAC2_HUMAN	3	15	63.9	31.566	294	18924000000	1139	1261600000	1	1	10	12	11	11	22	22	44
ACADSB	P45954	ACDSB_HUMAN	+	cellpart							+																	Short/branched chain specific acyl-CoA dehydrogenase, mitochondrial OS=Homo sapiens OX=9606 GN=ACADSB PE=1 SV=1;Isoform 2 of Short/branched chain specific acyl-CoA dehydrogenase, mitochondrial OS=Homo sapiens OX=9606 GN=ACADSB	sp|P45954|ACDSB_HUMAN;sp|P45954-2|ACDSB_HUMAN	0	68.315	sp|P45954|ACDSB_HUMAN;sp|P45954-2|ACDSB_HUMAN	2	19	61.8	47.485	432	3026900000	395	137590000	1	1	4	5	11	11	9	22	31
USP5	P45974-2	UBP5_HUMAN	+	cellpart							+																	Isoform Short of Ubiquitin carboxyl-terminal hydrolase 5 OS=Homo sapiens OX=9606 GN=USP5;Ubiquitin carboxyl-terminal hydrolase 5 OS=Homo sapiens OX=9606 GN=USP5 PE=1 SV=2	sp|P45974-2|UBP5_HUMAN;sp|P45974|UBP5_HUMAN	0	97.259	sp|P45974-2|UBP5_HUMAN;sp|P45974|UBP5_HUMAN	2	22	44.4	93.307	835	3988300000	770	102260000	1	1	10	10	12	12	20	24	44
CRKL	P46109	CRKL_HUMAN	+	cellpart							+																	Crk-like protein OS=Homo sapiens OX=9606 GN=CRKL PE=1 SV=1	sp|P46109|CRKL_HUMAN	0	19.821	sp|P46109|CRKL_HUMAN	1	13	51.2	33.777	303	2669200000	231	177950000	1	1	4	3	12	12	7	24	31
NSF	P46459	NSF_HUMAN	+	cellpart							+																	Vesicle-fusing ATPase OS=Homo sapiens OX=9606 GN=NSF PE=1 SV=3	sp|P46459|NSF_HUMAN	0	112.6	sp|P46459|NSF_HUMAN	1	25	46	82.593	744	6746300000	639	156890000	1	1	4	5	12	12	9	24	33
MAP1B	P46821	MAP1B_HUMAN	+	cellpart		Cell junction					+																	Microtubule-associated protein 1B OS=Homo sapiens OX=9606 GN=MAP1B PE=1 SV=2	sp|P46821|MAP1B_HUMAN	0.0017472	6.726	sp|P46821|MAP1B_HUMAN	1	3	3.4	270.63	2468	43479000	8	422120	0	1	0	0	1	1	0	2	2
NEDD4	P46934-4	NEDD4_HUMAN	+	cellpart			+		+		+																	Isoform 4 of E3 ubiquitin-protein ligase NEDD4 OS=Homo sapiens OX=9606 GN=NEDD4	sp|P46934-4|NEDD4_HUMAN	0.0056312	2.2403	sp|P46934-4|NEDD4_HUMAN	1	2	6.2	104.22	900	6492000	1	150980	0	0	0	0	0	0	0	0	0
UTRN	P46939	UTRO_HUMAN	+	cellmembrane		Cell junction	+		+		+																	Utrophin OS=Homo sapiens OX=9606 GN=UTRN PE=1 SV=2;Isoform 2 of Utrophin OS=Homo sapiens OX=9606 GN=UTRN;Isoform Up140 of Utrophin OS=Homo sapiens OX=9606 GN=UTRN	sp|P46939|UTRO_HUMAN;sp|P46939-2|UTRO_HUMAN;sp|P46939-4|UTRO_HUMAN	0	22.468	sp|P46939|UTRO_HUMAN;sp|P46939-2|UTRO_HUMAN;sp|P46939-4|UTRO_HUMAN;sp|P46939-3|UTRO_HUMAN	4	26	13.4	394.46	3433	1281500000	150	7365200	1	1	1	0	10	11	1	21	22
IQGAP1	P46940	IQGA1_HUMAN	+	cellmembrane		focal adhesion	+		+		+																	Ras GTPase-activating-like protein IQGAP1 OS=Homo sapiens OX=9606 GN=IQGAP1 PE=1 SV=1	sp|P46940|IQGA1_HUMAN	0.0019408	2.7064	sp|P46940|IQGA1_HUMAN	1	8	7.8	189.25	1657	262130000	15	3236200	1	1	4	3	2	2	7	4	11
GYG1	P46976	GLYG_HUMAN	+	cellpart							+																	Glycogenin-1 OS=Homo sapiens OX=9606 GN=GYG1 PE=1 SV=4;Isoform GN-1 of Glycogenin-1 OS=Homo sapiens OX=9606 GN=GYG1;Isoform GN-1S of Glycogenin-1 OS=Homo sapiens OX=9606 GN=GYG1	sp|P46976|GLYG_HUMAN;sp|P46976-2|GLYG_HUMAN;sp|P46976-3|GLYG_HUMAN	0.00063291	9.6659	sp|P46976|GLYG_HUMAN;sp|P46976-2|GLYG_HUMAN;sp|P46976-3|GLYG_HUMAN	3	5	26.3	39.383	350	431030000	36	30788000	1	1	3	3	5	5	6	10	16
STT3A	P46977-2	STT3A_HUMAN	+	cellmembrane							+																	Isoform 2 of Dolichyl-diphosphooligosaccharide--protein glycosyltransferase subunit STT3A OS=Homo sapiens OX=9606 GN=STT3A;Dolichyl-diphosphooligosaccharide--protein glycosyltransferase subunit STT3A OS=Homo sapiens OX=9606 GN=STT3A PE=1 SV=2	sp|P46977-2|STT3A_HUMAN;sp|P46977|STT3A_HUMAN	0	39.159	sp|P46977-2|STT3A_HUMAN;sp|P46977|STT3A_HUMAN	2	9	13.9	69.588	613	1326400000	201	49127000	1	1	1	2	11	11	3	22	25
PLA2G4A	P47712	PA24A_HUMAN	+	cellpart							+																	Cytosolic phospholipase A2 OS=Homo sapiens OX=9606 GN=PLA2G4A PE=1 SV=2	sp|P47712|PA24A_HUMAN	0	122.37	sp|P47712|PA24A_HUMAN	1	24	43.1	85.238	749	4232600000	553	128260000	1	1	5	5	10	10	10	20	30
CAPZA2	P47755	CAZA2_HUMAN	+	cellpart			+		+		+																	F-actin-capping protein subunit alpha-2 OS=Homo sapiens OX=9606 GN=CAPZA2 PE=1 SV=3;Isoform 2 of F-actin-capping protein subunit alpha-2 OS=Homo sapiens OX=9606 GN=CAPZA2	sp|P47755|CAZA2_HUMAN;sp|P47755-2|CAZA2_HUMAN	0	323.31	sp|P47755|CAZA2_HUMAN;sp|P47755-2|CAZA2_HUMAN	2	18	87.1	32.949	286	33642000000	1864	2587800000	1	1	9	10	12	12	19	24	43
CAPZB	P47756-2	CAPZB_HUMAN	+	cellpart			+		+		+																	Isoform 2 of F-actin-capping protein subunit beta OS=Homo sapiens OX=9606 GN=CAPZB;F-actin-capping protein subunit beta OS=Homo sapiens OX=9606 GN=CAPZB PE=1 SV=4	sp|P47756-2|CAPZB_HUMAN;sp|P47756|CAPZB_HUMAN	0	323.31	sp|P47756-2|CAPZB_HUMAN;sp|P47756|CAPZB_HUMAN	2	36	91.5	30.628	272	143590000000	3716	8974100000	1	1	12	12	12	12	24	24	48
QARS	P47897-2	SYQ_HUMAN	+	cellpart							+																	Isoform 2 of Glutamine--tRNA ligase OS=Homo sapiens OX=9606 GN=QARS;Glutamine--tRNA ligase OS=Homo sapiens OX=9606 GN=QARS PE=1 SV=1	sp|P47897-2|SYQ_HUMAN;sp|P47897|SYQ_HUMAN	0.00066711	12.034	sp|P47897-2|SYQ_HUMAN;sp|P47897|SYQ_HUMAN	2	4	11	86.578	764	64377000	12	1399500	1	1	0	1	1	0	1	1	2
LGALS7	P47929	LEG7_HUMAN	+	cellsurface			+		+																			Galectin-7 OS=Homo sapiens OX=9606 GN=LGALS7 PE=1 SV=2	sp|P47929|LEG7_HUMAN	0	31.998	sp|P47929|LEG7_HUMAN	1	11	78.7	15.075	136	840280000	29	84028000	0	0	0	0	0	0	0	0	0
UQCRFS1	P47985	UCRI_HUMAN	+	cellmembrane							+																	Cytochrome b-c1 complex subunit Rieske, mitochondrial OS=Homo sapiens OX=9606 GN=UQCRFS1 PE=1 SV=2	sp|P47985|UCRI_HUMAN	0	85.053	sp|P47985|UCRI_HUMAN	1	13	71.9	29.668	274	9340400000	660	667170000	1	1	10	10	12	12	20	24	44
ATP5PO	P48047	ATPO_HUMAN	+	cellmembrane							+																	ATP synthase subunit O, mitochondrial OS=Homo sapiens OX=9606 GN=ATP5PO PE=1 SV=1	sp|P48047|ATPO_HUMAN	0	180.26	sp|P48047|ATPO_HUMAN	1	18	73.2	23.277	213	47156000000	1765	3929700000	1	1	10	11	12	12	21	24	45
LIMS1	P48059	LIMS1_HUMAN	+	cellmembrane		Cell junction					+																	LIM and senescent cell antigen-like-containing domain protein 1 OS=Homo sapiens OX=9606 GN=LIMS1 PE=1 SV=4;Isoform 4 of LIM and senescent cell antigen-like-containing domain protein 1 OS=Homo sapiens OX=9606 GN=LIMS1;Isoform 2 of LIM and senescent cell ant	sp|P48059|LIMS1_HUMAN;sp|P48059-4|LIMS1_HUMAN;sp|P48059-2|LIMS1_HUMAN;sp|P48059-5|LIMS1_HUMAN;sp|P48059-3|LIMS1_HUMAN	0	323.31	sp|P48059|LIMS1_HUMAN;sp|P48059-4|LIMS1_HUMAN;sp|P48059-2|LIMS1_HUMAN;sp|P48059-5|LIMS1_HUMAN;sp|P48059-3|LIMS1_HUMAN;sp|Q7Z4I7-3|LIMS2_HUMAN;sp|Q7Z4I7|LIMS2_HUMAN;sp|Q7Z4I7-5|LIMS2_HUMAN;sp|Q7Z4I7-2|LIMS2_HUMAN;sp|Q7Z4I7-4|LIMS2_HUMAN;sp|P0CW19-2|LIMS3_HUMAN	11	46	93.2	37.251	325	437270000000	7275	23014000000	1	1	12	12	12	12	24	24	48
CXCL12	P48061-2	SDF1_HUMAN	+	serum/plasma	other		+		+		+																	Isoform Alpha of Stromal cell-derived factor 1 OS=Homo sapiens OX=9606 GN=CXCL12;Isoform Epsilon of Stromal cell-derived factor 1 OS=Homo sapiens OX=9606 GN=CXCL12;Stromal cell-derived factor 1 OS=Homo sapiens OX=9606 GN=CXCL12 PE=1 SV=1;Isoform Theta of S	sp|P48061-2|SDF1_HUMAN;sp|P48061-5|SDF1_HUMAN;sp|P48061|SDF1_HUMAN;sp|P48061-6|SDF1_HUMAN;sp|P48061-3|SDF1_HUMAN;sp|P48061-4|SDF1_HUMAN	0.0019399	2.6982	sp|P48061-2|SDF1_HUMAN;sp|P48061-5|SDF1_HUMAN;sp|P48061|SDF1_HUMAN;sp|P48061-6|SDF1_HUMAN;sp|P48061-3|SDF1_HUMAN;sp|P48061-4|SDF1_HUMAN	6	4	36	10.103	89	455420000	105	91083000	1	1	6	5	6	8	11	14	25
PREP	P48147	PPCE_HUMAN	+	cellpart							+																	Prolyl endopeptidase OS=Homo sapiens OX=9606 GN=PREP PE=1 SV=2	sp|P48147|PPCE_HUMAN	0.0015345	3.6956	sp|P48147|PPCE_HUMAN	1	4	10	80.699	710	72792000	17	1617600	0	1	0	0	3	3	0	6	6
ME1	P48163-2	MAOX_HUMAN	+	cellpart							+																	Isoform 2 of NADP-dependent malic enzyme OS=Homo sapiens OX=9606 GN=ME1;NADP-dependent malic enzyme OS=Homo sapiens OX=9606 GN=ME1 PE=1 SV=1	sp|P48163-2|MAOX_HUMAN;sp|P48163|MAOX_HUMAN	0	54.6	sp|P48163-2|MAOX_HUMAN;sp|P48163|MAOX_HUMAN	2	11	54.9	55.165	497	375820000	51	17896000	0	1	0	0	4	4	0	8	8
PIP4K2A	P48426	PI42A_HUMAN	+	cellmembrane							+																	Phosphatidylinositol 5-phosphate 4-kinase type-2 alpha OS=Homo sapiens OX=9606 GN=PIP4K2A PE=1 SV=2;Isoform 2 of Phosphatidylinositol 5-phosphate 4-kinase type-2 alpha OS=Homo sapiens OX=9606 GN=PIP4K2A	sp|P48426|PI42A_HUMAN;sp|P48426-2|PI42A_HUMAN	0	267.64	sp|P48426|PI42A_HUMAN;sp|P48426-2|PI42A_HUMAN	2	26	55.2	46.224	406	22279000000	1507	1237700000	1	1	11	12	12	12	23	24	47
ARCN1	P48444	COPD_HUMAN	+	cellmembrane							+																	Coatomer subunit delta OS=Homo sapiens OX=9606 GN=ARCN1 PE=1 SV=1;Isoform 2 of Coatomer subunit delta OS=Homo sapiens OX=9606 GN=ARCN1	sp|P48444|COPD_HUMAN;sp|P48444-2|COPD_HUMAN	0	12.897	sp|P48444|COPD_HUMAN;sp|P48444-2|COPD_HUMAN	2	10	23.5	57.21	511	738210000	272	28393000	1	1	9	8	12	12	17	24	41
LSS	P48449	ERG7_HUMAN	+	cellmembrane							+																	Lanosterol synthase OS=Homo sapiens OX=9606 GN=LSS PE=1 SV=1;Isoform 3 of Lanosterol synthase OS=Homo sapiens OX=9606 GN=LSS;Isoform 2 of Lanosterol synthase OS=Homo sapiens OX=9606 GN=LSS	sp|P48449|ERG7_HUMAN;sp|P48449-3|ERG7_HUMAN;sp|P48449-2|ERG7_HUMAN	0	24.224	sp|P48449|ERG7_HUMAN;sp|P48449-3|ERG7_HUMAN;sp|P48449-2|ERG7_HUMAN	3	19	32.4	83.308	732	1314300000	99	37550000	1	1	1	1	5	5	2	10	12
GCLM	P48507	GSH0_HUMAN	+	cellpart							+																	Glutamate--cysteine ligase regulatory subunit OS=Homo sapiens OX=9606 GN=GCLM PE=1 SV=1	sp|P48507|GSH0_HUMAN	0	28.028	sp|P48507|GSH0_HUMAN;sp|P48507-2|GSH0_HUMAN	2	8	28.1	30.727	274	1026500000	222	128310000	1	1	2	4	12	12	6	24	30
GSS	P48637	GSHB_HUMAN	+	cellpart			+		+		+																	Glutathione synthetase OS=Homo sapiens OX=9606 GN=GSS PE=1 SV=1;Isoform 2 of Glutathione synthetase OS=Homo sapiens OX=9606 GN=GSS	sp|P48637|GSHB_HUMAN;sp|P48637-2|GSHB_HUMAN	0	28.272	sp|P48637|GSHB_HUMAN;sp|P48637-2|GSHB_HUMAN	2	11	32.3	52.384	474	8901300000	191	329680000	1	1	3	4	9	10	7	19	26
CCT5	P48643	TCPE_HUMAN	+	cellpart			+		+		+																	T-complex protein 1 subunit epsilon OS=Homo sapiens OX=9606 GN=CCT5 PE=1 SV=1;Isoform 2 of T-complex protein 1 subunit epsilon OS=Homo sapiens OX=9606 GN=CCT5	sp|P48643|TCPE_HUMAN;sp|P48643-2|TCPE_HUMAN	0	323.31	sp|P48643|TCPE_HUMAN;sp|P48643-2|TCPE_HUMAN	2	36	78.4	59.67	541	23598000000	2276	694050000	1	1	10	10	12	12	20	24	44
KRT6C	P48668	K2C6C_HUMAN	+	cellpart			+		+																		+	Keratin, type II cytoskeletal 6C OS=Homo sapiens OX=9606 GN=KRT6C PE=1 SV=3;	sp|P48668|K2C6C_HUMAN;CON__sp|P48668|K2C6C_HUMAN	0	162.19	sp|P48668|K2C6C_HUMAN;CON__sp|P48668|K2C6C_HUMAN	2	24	52	60.024	564	5074100000	297	169140000	1	1	6	7	2	2	13	4	17
CSNK1D	P48730-2	KC1D_HUMAN	+	cellpart																								Isoform 2 of Casein kinase I isoform delta OS=Homo sapiens OX=9606 GN=CSNK1D;Casein kinase I isoform delta OS=Homo sapiens OX=9606 GN=CSNK1D PE=1 SV=2;Casein kinase I isoform epsilon OS=Homo sapiens OX=9606 GN=CSNK1E PE=1 SV=1	sp|P48730-2|KC1D_HUMAN;sp|P48730|KC1D_HUMAN;sp|P49674|KC1E_HUMAN	0.0016429	5.2636	sp|P48730-2|KC1D_HUMAN;sp|P48730|KC1D_HUMAN;sp|P49674|KC1E_HUMAN	3	5	15.4	46.832	409	75038000	12	3573200	0	0	0	0	0	0	0	0	0
IDH2	P48735	IDHP_HUMAN	+	cellpart			+		+		+																	Isocitrate dehydrogenase [NADP], mitochondrial OS=Homo sapiens OX=9606 GN=IDH2 PE=1 SV=2;Isoform 2 of Isocitrate dehydrogenase [NADP], mitochondrial OS=Homo sapiens OX=9606 GN=IDH2	sp|P48735|IDHP_HUMAN;sp|P48735-2|IDHP_HUMAN	0	323.31	sp|P48735|IDHP_HUMAN;sp|P48735-2|IDHP_HUMAN	2	47	80.1	50.909	452	240340000000	6438	10449000000	1	1	12	12	12	12	24	24	48
PITPNB	P48739	PIPNB_HUMAN	+	cellpart							+																	Phosphatidylinositol transfer protein beta isoform OS=Homo sapiens OX=9606 GN=PITPNB PE=1 SV=2;Isoform 2 of Phosphatidylinositol transfer protein beta isoform OS=Homo sapiens OX=9606 GN=PITPNB;Isoform 3 of Phosphatidylinositol transfer protein beta isoform	sp|P48739|PIPNB_HUMAN;sp|P48739-2|PIPNB_HUMAN;sp|P48739-3|PIPNB_HUMAN	0.0016722	5.6554	sp|P48739|PIPNB_HUMAN;sp|P48739-2|PIPNB_HUMAN;sp|P48739-3|PIPNB_HUMAN	3	3	17	31.54	271	1106700000	112	61486000	1	1	0	1	9	10	1	19	20
MASP1	P48740	MASP1_HUMAN	+	cellsurface							+																	Mannan-binding lectin serine protease 1 OS=Homo sapiens OX=9606 GN=MASP1 PE=1 SV=3	sp|P48740|MASP1_HUMAN	0.0016376	5.2095	sp|P48740|MASP1_HUMAN	1	5	9.6	79.246	699	149810000	24	4993500	1	1	1	1	2	3	2	5	7
DNASE1L1	P49184	DNSL1_HUMAN	+	cellpart							+																	Deoxyribonuclease-1-like 1 OS=Homo sapiens OX=9606 GN=DNASE1L1 PE=1 SV=1	sp|P49184|DNSL1_HUMAN	0	26.078	sp|P49184|DNSL1_HUMAN	1	3	16.2	33.892	302	343560000	53	24540000	1	1	1	1	5	3	2	8	10
ALDH9A1	P49189	AL9A1_HUMAN	+	cellpart			+		+		+																	4-trimethylaminobutyraldehyde dehydrogenase OS=Homo sapiens OX=9606 GN=ALDH9A1 PE=1 SV=3;Isoform 3 of 4-trimethylaminobutyraldehyde dehydrogenase OS=Homo sapiens OX=9606 GN=ALDH9A1;Isoform 2 of 4-trimethylaminobutyraldehyde dehydrogenase OS=Homo sapiens OX	sp|P49189|AL9A1_HUMAN;sp|P49189-3|AL9A1_HUMAN;sp|P49189-2|AL9A1_HUMAN	0	36.142	sp|P49189|AL9A1_HUMAN;sp|P49189-3|AL9A1_HUMAN;sp|P49189-2|AL9A1_HUMAN	3	14	35	53.801	494	1052300000	134	43846000	1	1	0	1	9	9	1	18	19
RPIA	P49247	RPIA_HUMAN	+	cellpart							+																	Ribose-5-phosphate isomerase OS=Homo sapiens OX=9606 GN=RPIA PE=1 SV=3	sp|P49247|RPIA_HUMAN	0.0017411	6.6585	sp|P49247|RPIA_HUMAN	1	2	11.3	33.269	311	137490000	19	7236100	0	1	0	0	1	1	0	2	2
LMAN1	P49257	LMAN1_HUMAN	+	cellmembrane			+		+		+																	Protein ERGIC-53 OS=Homo sapiens OX=9606 GN=LMAN1 PE=1 SV=2	sp|P49257|LMAN1_HUMAN	0	279.25	sp|P49257|LMAN1_HUMAN	1	21	44.9	57.548	510	18269000000	930	869970000	1	1	9	10	12	12	19	24	43
FMO5	P49326	FMO5_HUMAN	+	cellmembrane							+																	Dimethylaniline monooxygenase [N-oxide-forming] 5 OS=Homo sapiens OX=9606 GN=FMO5 PE=1 SV=2;Isoform 2 of Dimethylaniline monooxygenase [N-oxide-forming] 5 OS=Homo sapiens OX=9606 GN=FMO5;Isoform 3 of Dimethylaniline monooxygenase [N-oxide-forming] 5 OS=Hom	sp|P49326|FMO5_HUMAN;sp|P49326-2|FMO5_HUMAN;sp|P49326-3|FMO5_HUMAN	0.0015045	3.409	sp|P49326|FMO5_HUMAN;sp|P49326-2|FMO5_HUMAN;sp|P49326-3|FMO5_HUMAN	3	2	11.8	60.22	533	7641500	4	263500	0	1	0	0	1	0	0	1	1
FASN	P49327	FAS_HUMAN	+	cellpart			+		+		+																	Fatty acid synthase OS=Homo sapiens OX=9606 GN=FASN PE=1 SV=3	sp|P49327|FAS_HUMAN	0	250	sp|P49327|FAS_HUMAN	1	72	50.8	273.42	2511	17411000000	1804	143890000	1	1	10	10	12	12	20	24	44
CCT3	P49368	TCPG_HUMAN	+	cellpart			+		+		+																	T-complex protein 1 subunit gamma OS=Homo sapiens OX=9606 GN=CCT3 PE=1 SV=4;Isoform 2 of T-complex protein 1 subunit gamma OS=Homo sapiens OX=9606 GN=CCT3	sp|P49368|TCPG_HUMAN;sp|P49368-2|TCPG_HUMAN	0	146.98	sp|P49368|TCPG_HUMAN;sp|P49368-2|TCPG_HUMAN	2	34	76.1	60.533	545	28666000000	1951	924700000	1	1	9	10	12	12	19	24	43
ARRB1	P49407-2	ARRB1_HUMAN	+	cellpart							+																	Isoform 1B of Beta-arrestin-1 OS=Homo sapiens OX=9606 GN=ARRB1;Beta-arrestin-1 OS=Homo sapiens OX=9606 GN=ARRB1 PE=1 SV=2	sp|P49407-2|ARRB1_HUMAN;sp|P49407|ARRB1_HUMAN	0	193.04	sp|P49407-2|ARRB1_HUMAN;sp|P49407|ARRB1_HUMAN	2	24	70	46.308	410	11377000000	1322	598790000	1	1	10	10	12	12	20	24	44
TUFM	P49411	EFTU_HUMAN	+	cellpart			+		+		+																	Elongation factor Tu, mitochondrial OS=Homo sapiens OX=9606 GN=TUFM PE=1 SV=2	sp|P49411|EFTU_HUMAN	0	310.02	sp|P49411|EFTU_HUMAN	1	37	81.4	49.541	452	38607000000	3036	1245400000	1	1	11	12	12	12	23	24	47
AARS	P49588	SYAC_HUMAN	+	cellpart			+		+		+																	Alanine--tRNA ligase, cytoplasmic OS=Homo sapiens OX=9606 GN=AARS PE=1 SV=2;Isoform 2 of Alanine--tRNA ligase, cytoplasmic OS=Homo sapiens OX=9606 GN=AARS	sp|P49588|SYAC_HUMAN;sp|P49588-2|SYAC_HUMAN	0	161.25	sp|P49588|SYAC_HUMAN;sp|P49588-2|SYAC_HUMAN	2	27	46.1	106.81	968	3181400000	519	63627000	1	1	4	5	11	11	9	22	31
SARS	P49591	SYSC_HUMAN	+	cellpart			+		+		+																	Serine--tRNA ligase, cytoplasmic OS=Homo sapiens OX=9606 GN=SARS PE=1 SV=3	sp|P49591|SYSC_HUMAN	0	30.834	sp|P49591|SYSC_HUMAN	1	11	28.6	58.777	514	1012300000	184	38935000	1	1	3	3	11	12	6	23	29
PPM1F	P49593	PPM1F_HUMAN	+	cellpart							+																	Protein phosphatase 1F OS=Homo sapiens OX=9606 GN=PPM1F PE=1 SV=3;Isoform 2 of Protein phosphatase 1F OS=Homo sapiens OX=9606 GN=PPM1F	sp|P49593|PPM1F_HUMAN;sp|P49593-2|PPM1F_HUMAN	0	125.7	sp|P49593|PPM1F_HUMAN;sp|P49593-2|PPM1F_HUMAN	2	19	70	49.83	454	5330500000	529	242290000	1	1	6	5	10	12	11	22	33
DGKG	P49619-3	DGKG_HUMAN	+	cellpart							+																	Isoform 3 of Diacylglycerol kinase gamma OS=Homo sapiens OX=9606 GN=DGKG;Isoform 2 of Diacylglycerol kinase gamma OS=Homo sapiens OX=9606 GN=DGKG;Diacylglycerol kinase gamma OS=Homo sapiens OX=9606 GN=DGKG PE=2 SV=3	sp|P49619-3|DGKG_HUMAN;sp|P49619-2|DGKG_HUMAN;sp|P49619|DGKG_HUMAN	0.0019465	2.7979	sp|P49619-3|DGKG_HUMAN;sp|P49619-2|DGKG_HUMAN;sp|P49619|DGKG_HUMAN	3	2	5.2	84.572	752	150700000	7	4709400	0	1	0	0	2	4	0	6	6
MAN2A2	P49641	MA2A2_HUMAN	+	cellmembrane							+																	Alpha-mannosidase 2x OS=Homo sapiens OX=9606 GN=MAN2A2 PE=2 SV=3;Isoform 1 of Alpha-mannosidase 2x OS=Homo sapiens OX=9606 GN=MAN2A2;Isoform 2 of Alpha-mannosidase 2x OS=Homo sapiens OX=9606 GN=MAN2A2	sp|P49641|MA2A2_HUMAN;sp|P49641-1|MA2A2_HUMAN;sp|P49641-2|MA2A2_HUMAN	0.0014978	3.3057	sp|P49641|MA2A2_HUMAN;sp|P49641-1|MA2A2_HUMAN;sp|P49641-2|MA2A2_HUMAN	3	4	7.7	130.54	1150	45820000	9	881160	0	1	0	0	2	1	0	3	3
PSMB3	P49720	PSB3_HUMAN	+	cellpart			+		+		+																	Proteasome subunit beta type-3 OS=Homo sapiens OX=9606 GN=PSMB3 PE=1 SV=2	sp|P49720|PSB3_HUMAN	0	16.915	sp|P49720|PSB3_HUMAN	1	8	45.9	22.949	205	652990000	136	72554000	1	1	3	4	8	10	7	18	25
PSMB2	P49721	PSB2_HUMAN	+	cellpart			+		+		+																	Proteasome subunit beta type-2 OS=Homo sapiens OX=9606 GN=PSMB2 PE=1 SV=1	sp|P49721|PSB2_HUMAN	0	16.265	sp|P49721|PSB2_HUMAN	1	7	64.2	22.836	201	1031500000	127	103150000	1	1	0	1	6	8	1	14	15
ACADVL	P49748-2	ACADV_HUMAN	+	cellpart							+																	Isoform 2 of Very long-chain specific acyl-CoA dehydrogenase, mitochondrial OS=Homo sapiens OX=9606 GN=ACADVL;Very long-chain specific acyl-CoA dehydrogenase, mitochondrial OS=Homo sapiens OX=9606 GN=ACADVL PE=1 SV=1;Isoform 3 of Very long-chain specific a	sp|P49748-2|ACADV_HUMAN;sp|P49748|ACADV_HUMAN;sp|P49748-3|ACADV_HUMAN	0	323.31	sp|P49748-2|ACADV_HUMAN;sp|P49748|ACADV_HUMAN;sp|P49748-3|ACADV_HUMAN	3	30	57.5	68.058	633	14879000000	1619	371970000	1	1	10	10	12	12	20	24	44
ACOT2	P49753	ACOT2_HUMAN	+	cellpart							+																	Acyl-coenzyme A thioesterase 2, mitochondrial OS=Homo sapiens OX=9606 GN=ACOT2 PE=1 SV=6;Acyl-coenzyme A thioesterase 1 OS=Homo sapiens OX=9606 GN=ACOT1 PE=1 SV=1;Isoform 2 of Acyl-coenzyme A thioesterase 2, mitochondrial OS=Homo sapiens OX=9606 GN=ACOT2	sp|P49753|ACOT2_HUMAN;sp|Q86TX2|ACOT1_HUMAN;sp|P49753-2|ACOT2_HUMAN	0	57.418	sp|P49753|ACOT2_HUMAN;sp|Q86TX2|ACOT1_HUMAN;sp|P49753-2|ACOT2_HUMAN	3	4	17.6	53.218	483	224750000	36	7491800	0	1	0	0	4	3	0	7	7
TMED10	P49755	TMEDA_HUMAN	+	cellmembrane							+																	Transmembrane emp24 domain-containing protein 10 OS=Homo sapiens OX=9606 GN=TMED10 PE=1 SV=2	sp|P49755|TMEDA_HUMAN	0	169.57	sp|P49755|TMEDA_HUMAN	1	16	44.7	24.976	219	15718000000	1121	1309800000	1	1	10	11	12	12	21	24	45
VEGFC	P49767	VEGFC_HUMAN	+	cellsurface							+																	Vascular endothelial growth factor C OS=Homo sapiens OX=9606 GN=VEGFC PE=1 SV=1	sp|P49767|VEGFC_HUMAN	0.0016694	5.6093	sp|P49767|VEGFC_HUMAN	1	6	17.9	46.883	419	142540000	31	5701700	0	1	0	0	6	5	0	11	11
HINT1	P49773	HINT1_HUMAN	+	cellpart			+		+		+																	Histidine triad nucleotide-binding protein 1 OS=Homo sapiens OX=9606 GN=HINT1 PE=1 SV=2	sp|P49773|HINT1_HUMAN	0	32.704	sp|P49773|HINT1_HUMAN	1	10	86.5	13.802	126	1766200000	197	220780000	1	1	3	2	10	11	5	21	26
NDUFV1	P49821-2	NDUV1_HUMAN	+	cellmembrane							+																	Isoform 2 of NADH dehydrogenase [ubiquinone] flavoprotein 1, mitochondrial OS=Homo sapiens OX=9606 GN=NDUFV1;NADH dehydrogenase [ubiquinone] flavoprotein 1, mitochondrial OS=Homo sapiens OX=9606 GN=NDUFV1 PE=1 SV=4	sp|P49821-2|NDUV1_HUMAN;sp|P49821|NDUV1_HUMAN	0	48.686	sp|P49821-2|NDUV1_HUMAN;sp|P49821|NDUV1_HUMAN	2	16	59.6	49.867	455	1901300000	274	82663000	1	1	2	1	10	11	3	21	24
GSK3B	P49841	GSK3B_HUMAN	+	cellpart							+																	Glycogen synthase kinase-3 beta OS=Homo sapiens OX=9606 GN=GSK3B PE=1 SV=2;Isoform 2 of Glycogen synthase kinase-3 beta OS=Homo sapiens OX=9606 GN=GSK3B	sp|P49841|GSK3B_HUMAN;sp|P49841-2|GSK3B_HUMAN	0.0016911	5.8758	sp|P49841|GSK3B_HUMAN;sp|P49841-2|GSK3B_HUMAN	2	2	12.6	46.744	420	185700000	38	8842700	0	1	0	0	4	4	0	8	8
TAF6	P49848-4	TAF6_HUMAN	+	cellpart																								Isoform 4 of Transcription initiation factor TFIID subunit 6 OS=Homo sapiens OX=9606 GN=TAF6;Isoform 2 of Transcription initiation factor TFIID subunit 6 OS=Homo sapiens OX=9606 GN=TAF6;Transcription initiation factor TFIID subunit 6 OS=Homo sapiens OX=960	sp|P49848-4|TAF6_HUMAN;sp|P49848-2|TAF6_HUMAN;sp|P49848|TAF6_HUMAN;sp|P49848-3|TAF6_HUMAN	0.0090375	1.8087	sp|P49848-4|TAF6_HUMAN;sp|P49848-2|TAF6_HUMAN;sp|P49848|TAF6_HUMAN;sp|P49848-3|TAF6_HUMAN	4	2	5.2	71.479	667	126750000	4	3249900	0	0	0	0	0	0	0	0	0
NT5C2	P49902-2	5NTC_HUMAN	+	cellpart							+																	Isoform 2 of Cytosolic purine 5-nucleotidase OS=Homo sapiens OX=9606 GN=NT5C2;Cytosolic purine 5-nucleotidase OS=Homo sapiens OX=9606 GN=NT5C2 PE=1 SV=1	sp|P49902-2|5NTC_HUMAN;sp|P49902|5NTC_HUMAN	0.0019277	2.6378	sp|P49902-2|5NTC_HUMAN;sp|P49902|5NTC_HUMAN	2	3	12	61.44	532	105290000	5	4387300	0	1	0	0	1	1	0	2	2
SELENOP	P49908	SEPP1_HUMAN	+	serum/plasma	other		+		+		+																	Selenoprotein P OS=Homo sapiens OX=9606 GN=SELENOP PE=1 SV=3	sp|P49908|SEPP1_HUMAN	0	29.231	sp|P49908|SEPP1_HUMAN	1	11	27.6	43.173	381	6284500000	592	349140000	1	1	11	11	12	12	22	24	46
CAMP	P49913	CAMP_HUMAN	+	serum/plasma	other		+		+																			Cathelicidin antimicrobial peptide OS=Homo sapiens OX=9606 GN=CAMP PE=1 SV=1	sp|P49913|CAMP_HUMAN	0	98.396	sp|P49913|CAMP_HUMAN	1	8	40	19.301	170	3155400000	435	350600000	1	1	10	11	10	9	21	19	40
GNAQ	P50148	GNAQ_HUMAN	+	cellmembrane			+		+		+																	Guanine nucleotide-binding protein G(q) subunit alpha OS=Homo sapiens OX=9606 GN=GNAQ PE=1 SV=4	sp|P50148|GNAQ_HUMAN	0	317.04	sp|P50148|GNAQ_HUMAN;sp|P29992|GNA11_HUMAN	2	30	76.3	42.142	359	72358000000	2899	3808300000	1	1	12	12	12	12	24	24	48
GNG10	P50151	GBG10_HUMAN	+	cellmembrane							+																	Guanine nucleotide-binding protein G(I)/G(S)/G(O) subunit gamma-10 OS=Homo sapiens OX=9606 GN=GNG10 PE=1 SV=1	sp|P50151|GBG10_HUMAN	0	45.906	sp|P50151|GBG10_HUMAN;sp|Q9H1X3-3|DJC25_HUMAN	2	7	91.2	7.2053	68	991180000	72	247790000	0	1	0	0	7	7	0	14	14
IDH3A	P50213	IDH3A_HUMAN	+	cellpart							+																	Isocitrate dehydrogenase [NAD] subunit alpha, mitochondrial OS=Homo sapiens OX=9606 GN=IDH3A PE=1 SV=1;Isoform 2 of Isocitrate dehydrogenase [NAD] subunit alpha, mitochondrial OS=Homo sapiens OX=9606 GN=IDH3A	sp|P50213|IDH3A_HUMAN;sp|P50213-2|IDH3A_HUMAN	0.0012446	9.1908	sp|P50213|IDH3A_HUMAN;sp|P50213-2|IDH3A_HUMAN	2	12	35.5	39.591	366	531780000	77	26589000	1	1	4	5	8	8	9	16	25
SULT1A1	P50225	ST1A1_HUMAN	+	cellpart							+																	Sulfotransferase 1A1 OS=Homo sapiens OX=9606 GN=SULT1A1 PE=1 SV=3	sp|P50225|ST1A1_HUMAN	0.001227	8.4776	sp|P50225|ST1A1_HUMAN;sp|P50225-2|ST1A1_HUMAN	2	5	48.5	34.165	295	803350000	71	47256000	1	1	3	2	5	6	5	11	16
GDI2	P50395	GDIB_HUMAN	+	cellmembrane		focal adhesion	+		+		+																	Rab GDP dissociation inhibitor beta OS=Homo sapiens OX=9606 GN=GDI2 PE=1 SV=2;Isoform 2 of Rab GDP dissociation inhibitor beta OS=Homo sapiens OX=9606 GN=GDI2	sp|P50395|GDIB_HUMAN;sp|P50395-2|GDIB_HUMAN	0	267.99	sp|P50395|GDIB_HUMAN;sp|P50395-2|GDIB_HUMAN	2	28	90.1	50.663	445	20178000000	1533	747330000	1	1	12	12	12	12	24	24	48
EMD	P50402	EMD_HUMAN	+	cellmembrane							+																	Emerin OS=Homo sapiens OX=9606 GN=EMD PE=1 SV=1	sp|P50402|EMD_HUMAN	0.001938	2.6904	sp|P50402|EMD_HUMAN	1	3	29.5	28.994	254	19993000	9	1428100	1	0	0	2	0	0	2	0	2
CPT1A	P50416	CPT1A_HUMAN	+	cellmembrane							+																	Carnitine O-palmitoyltransferase 1, liver isoform OS=Homo sapiens OX=9606 GN=CPT1A PE=1 SV=2;Isoform 2 of Carnitine O-palmitoyltransferase 1, liver isoform OS=Homo sapiens OX=9606 GN=CPT1A	sp|P50416|CPT1A_HUMAN;sp|P50416-2|CPT1A_HUMAN	0	276.26	sp|P50416|CPT1A_HUMAN;sp|P50416-2|CPT1A_HUMAN	2	30	50.6	88.367	773	18593000000	1525	476750000	1	1	11	12	12	12	23	24	47
GATM	P50440	GATM_HUMAN	+	cellmembrane			+		+		+																	Glycine amidinotransferase, mitochondrial OS=Homo sapiens OX=9606 GN=GATM PE=1 SV=1;Isoform 2 of Glycine amidinotransferase, mitochondrial OS=Homo sapiens OX=9606 GN=GATM;Isoform 3 of Glycine amidinotransferase, mitochondrial OS=Homo sapiens OX=9606 GN=GAT	sp|P50440|GATM_HUMAN;sp|P50440-2|GATM_HUMAN;sp|P50440-3|GATM_HUMAN	0	30.846	sp|P50440|GATM_HUMAN;sp|P50440-2|GATM_HUMAN;sp|P50440-3|GATM_HUMAN	3	7	27.9	48.455	423	2556600000	185	102260000	1	1	4	3	8	8	7	16	23
SERPINB9	P50453	SPB9_HUMAN	+	cellsurface			+		+		+																	Serpin B9 OS=Homo sapiens OX=9606 GN=SERPINB9 PE=1 SV=1	sp|P50453|SPB9_HUMAN	0	20.015	sp|P50453|SPB9_HUMAN	1	13	52.4	42.403	376	1800700000	135	81848000	1	1	2	1	9	9	3	18	21
SERPINH1	P50454	SERPH_HUMAN	+	cellsurface							+																	Serpin H1 OS=Homo sapiens OX=9606 GN=SERPINH1 PE=1 SV=2	sp|P50454|SERPH_HUMAN	0	117.92	sp|P50454|SERPH_HUMAN	1	20	56.2	46.44	418	10427000000	888	453340000	1	1	6	7	11	11	13	22	35
ST13	P50502	F10A1_HUMAN	+	cellpart			+		+		+																	Hsc70-interacting protein OS=Homo sapiens OX=9606 GN=ST13 PE=1 SV=2;Putative protein FAM10A5 OS=Homo sapiens OX=9606 GN=ST13P5 PE=5 SV=1;Putative protein FAM10A4 OS=Homo sapiens OX=9606 GN=ST13P4 PE=5 SV=1	sp|P50502|F10A1_HUMAN;sp|Q8NFI4|F10A5_HUMAN;sp|Q8IZP2|ST134_HUMAN	0	45.175	sp|P50502|F10A1_HUMAN;sp|Q8NFI4|F10A5_HUMAN;sp|Q8IZP2|ST134_HUMAN	3	17	33.9	41.331	369	13188000000	447	1014500000	1	1	9	11	11	11	20	22	42
VASP	P50552	VASP_HUMAN	+	cellpart		Cell junction	+		+		+																	Vasodilator-stimulated phosphoprotein OS=Homo sapiens OX=9606 GN=VASP PE=1 SV=3	sp|P50552|VASP_HUMAN	0	323.31	sp|P50552|VASP_HUMAN	1	34	69.2	39.829	380	84727000000	3533	4983900000	1	1	12	12	12	12	24	24	48
DNM2	P50570-2	DYN2_HUMAN	+	cellpart		Cell junction	+		+		+																	Isoform 2 of Dynamin-2 OS=Homo sapiens OX=9606 GN=DNM2;Isoform 5 of Dynamin-2 OS=Homo sapiens OX=9606 GN=DNM2;Dynamin-2 OS=Homo sapiens OX=9606 GN=DNM2 PE=1 SV=2	sp|P50570-2|DYN2_HUMAN;sp|P50570-5|DYN2_HUMAN;sp|P50570|DYN2_HUMAN	0	58.881	sp|P50570-2|DYN2_HUMAN;sp|P50570-5|DYN2_HUMAN;sp|P50570|DYN2_HUMAN	3	27	41	97.651	866	3073000000	392	66805000	1	1	8	6	11	11	14	22	36
LRBA	P50851-2	LRBA_HUMAN	+	cellmembrane							+																	Isoform 2 of Lipopolysaccharide-responsive and beige-like anchor protein OS=Homo sapiens OX=9606 GN=LRBA	sp|P50851-2|LRBA_HUMAN	0	225.87	sp|P50851-2|LRBA_HUMAN	1	58	29.8	317.7	2851	16075000000	1477	115640000	1	1	8	8	12	12	16	24	40
CCT8	P50990	TCPQ_HUMAN	+	cellpart			+		+		+																	T-complex protein 1 subunit theta OS=Homo sapiens OX=9606 GN=CCT8 PE=1 SV=4;Isoform 2 of T-complex protein 1 subunit theta OS=Homo sapiens OX=9606 GN=CCT8;Isoform 3 of T-complex protein 1 subunit theta OS=Homo sapiens OX=9606 GN=CCT8	sp|P50990|TCPQ_HUMAN;sp|P50990-2|TCPQ_HUMAN;sp|P50990-3|TCPQ_HUMAN	0	102.12	sp|P50990|TCPQ_HUMAN;sp|P50990-2|TCPQ_HUMAN;sp|P50990-3|TCPQ_HUMAN	3	41	73.4	59.62	548	22795000000	1639	616090000	1	1	10	9	12	12	19	24	43
CCT4	P50991	TCPD_HUMAN	+	cellpart			+		+		+																	T-complex protein 1 subunit delta OS=Homo sapiens OX=9606 GN=CCT4 PE=1 SV=4;Isoform 2 of T-complex protein 1 subunit delta OS=Homo sapiens OX=9606 GN=CCT4	sp|P50991|TCPD_HUMAN;sp|P50991-2|TCPD_HUMAN	0	283.25	sp|P50991|TCPD_HUMAN;sp|P50991-2|TCPD_HUMAN	2	27	69.6	57.924	539	89260000000	1455	2789400000	1	1	9	10	12	12	19	24	43
ANXA11	P50995	ANX11_HUMAN	+	cellsurface			+		+		+																	Annexin A11 OS=Homo sapiens OX=9606 GN=ANXA11 PE=1 SV=1;Isoform 2 of Annexin A11 OS=Homo sapiens OX=9606 GN=ANXA11	sp|P50995|ANX11_HUMAN;sp|P50995-2|ANX11_HUMAN	0	60.574	sp|P50995|ANX11_HUMAN;sp|P50995-2|ANX11_HUMAN;sp|P27216|ANX13_HUMAN	3	13	29.5	54.389	505	4137000000	416	217740000	1	1	6	8	11	11	14	22	36
RAB5C	P51148	RAB5C_HUMAN	+	cellmembrane		Endosome	+		+		+																	Ras-related protein Rab-5C OS=Homo sapiens OX=9606 GN=RAB5C PE=1 SV=2;Isoform 2 of Ras-related protein Rab-5C OS=Homo sapiens OX=9606 GN=RAB5C	sp|P51148|RAB5C_HUMAN;sp|P51148-2|RAB5C_HUMAN	0	195.32	sp|P51148|RAB5C_HUMAN;sp|P51148-2|RAB5C_HUMAN	2	12	63.9	23.482	216	22227000000	1500	2020600000	1	1	11	11	12	12	22	24	46
RAB7A	P51149	RAB7A_HUMAN	+	cellmembrane		Endosome	+		+		+																	Ras-related protein Rab-7a OS=Homo sapiens OX=9606 GN=RAB7A PE=1 SV=1	sp|P51149|RAB7A_HUMAN	0	323.31	sp|P51149|RAB7A_HUMAN	1	24	84.5	23.489	207	61316000000	2978	4379700000	1	1	12	12	12	12	24	24	48
RAB13	P51153	RAB13_HUMAN	+	cellmembrane		Endosome	+		+		+																	Ras-related protein Rab-13 OS=Homo sapiens OX=9606 GN=RAB13 PE=1 SV=1	sp|P51153|RAB13_HUMAN	0.0016465	5.3226	sp|P51153|RAB13_HUMAN;sp|P59190-2|RAB15_HUMAN;sp|P59190|RAB15_HUMAN;sp|P20336|RAB3A_HUMAN	4	5	52.7	22.774	203	752940000	50	62745000	1	1	1	1	6	6	2	12	14
RAB27A	P51159-2	RB27A_HUMAN	+	cellmembrane			+		+		+																	Isoform Short of Ras-related protein Rab-27A OS=Homo sapiens OX=9606 GN=RAB27A;Ras-related protein Rab-27A OS=Homo sapiens OX=9606 GN=RAB27A PE=1 SV=3	sp|P51159-2|RB27A_HUMAN;sp|P51159|RB27A_HUMAN	0.0073631	2.0391	sp|P51159-2|RB27A_HUMAN;sp|P51159|RB27A_HUMAN	2	2	29.1	24.041	213	1591900	2	122460	0	0	0	0	0	0	0	0	0
DUSP3	P51452	DUS3_HUMAN	+	cellpart							+																	Dual specificity protein phosphatase 3 OS=Homo sapiens OX=9606 GN=DUSP3 PE=1 SV=1;Isoform 2 of Dual specificity protein phosphatase 3 OS=Homo sapiens OX=9606 GN=DUSP3	sp|P51452|DUS3_HUMAN;sp|P51452-2|DUS3_HUMAN	0	53.761	sp|P51452|DUS3_HUMAN;sp|P51452-2|DUS3_HUMAN	2	11	78.4	20.478	185	4089600000	444	454400000	1	1	4	4	10	10	8	20	28
IDH3G	P51553	IDH3G_HUMAN	+	cellpart							+																	Isocitrate dehydrogenase [NAD] subunit gamma, mitochondrial OS=Homo sapiens OX=9606 GN=IDH3G PE=1 SV=1;Isoform 2 of Isocitrate dehydrogenase [NAD] subunit gamma, mitochondrial OS=Homo sapiens OX=9606 GN=IDH3G	sp|P51553|IDH3G_HUMAN;sp|P51553-2|IDH3G_HUMAN	0.00065104	10.722	sp|P51553|IDH3G_HUMAN;sp|P51553-2|IDH3G_HUMAN	2	8	36.1	42.794	393	292280000	37	18268000	0	1	0	0	4	4	0	8	8
SSR4	P51571	SSRD_HUMAN	+	cellmembrane			+		+		+																	Translocon-associated protein subunit delta OS=Homo sapiens OX=9606 GN=SSR4 PE=1 SV=1	sp|P51571|SSRD_HUMAN	0	23.048	sp|P51571|SSRD_HUMAN	1	6	48	18.998	173	7015600000	574	1002200000	1	1	9	8	11	11	17	22	39
BCAP31	P51572	BAP31_HUMAN	+	cellmembrane							+																	B-cell receptor-associated protein 31 OS=Homo sapiens OX=9606 GN=BCAP31 PE=1 SV=3;Isoform 2 of B-cell receptor-associated protein 31 OS=Homo sapiens OX=9606 GN=BCAP31	sp|P51572|BAP31_HUMAN;sp|P51572-2|BAP31_HUMAN	0	191.44	sp|P51572|BAP31_HUMAN;sp|P51572-2|BAP31_HUMAN	2	26	61	27.991	246	39584000000	1352	2638900000	1	1	10	12	12	12	22	24	46
P2RX1	P51575	P2RX1_HUMAN	+	cellmembrane							+																	P2X purinoceptor 1 OS=Homo sapiens OX=9606 GN=P2RX1 PE=1 SV=1	sp|P51575|P2RX1_HUMAN	0	75.775	sp|P51575|P2RX1_HUMAN	1	14	45.4	44.98	399	12030000000	1109	668350000	1	1	10	10	12	12	20	24	44
RENBP	P51606	RENBP_HUMAN	+	cellpart			+		+		+																	N-acylglucosamine 2-epimerase OS=Homo sapiens OX=9606 GN=RENBP PE=1 SV=2	sp|P51606|RENBP_HUMAN	0	19.239	sp|P51606|RENBP_HUMAN	1	8	25.1	48.83	427	1369500000	183	72077000	1	1	2	3	11	11	5	22	27
[truncated: 1,129 more rows]
[truncated: 449 more columns]

## Sheet: normalization of PFP and PPP
GN	Leading_Protein	ID	nr GN	Protein class	Serum/Plasma factor	Exosome	Blood microparticle	Burkhart platelet proteome	# cells	Cell marker	marker class	Endothial cell	Stem/Progenitor	T Cell	B Cell	NK cell	Dendritic cell	Lymphocytes	Monoc./Macroph.	Granulocyte	Platelet	Erythrocyte	Potential contaminant	Protein IDs	Majority protein IDs	Fasta headers	Number of proteins	Razor + unique peptides	Sequence coverage [%]	Mol. weight [kDa]	Sequence length	Q-value	Score	cnts test results	Num Ident byMSMS//byMatch BE349_PFP_C	Num Ident byMSMS//byMatch BE351_PFP_C	Num Ident byMSMS//byMatch BE352_PFP_C	Num Ident byMSMS//byMatch BE353_PFP_C	Num Ident byMSMS//byMatch BE354_PFP_C	Num Ident byMSMS//byMatch BE355_PFP_C	Num Ident byMSMS//byMatch BE009_PFP_C	Num Ident byMSMS//byMatch BE019_PFP_C	Num Ident byMSMS//byMatch BE025_PFP_C	Num Ident byMSMS//byMatch BE140_PFP_C	Num Ident byMSMS//byMatch BE322_PFP_C	Num Ident byMSMS//byMatch BE363_PFP_C	Num Ident byMSMS//byMatch BE349_PFP_PTS	Num Ident byMSMS//byMatch BE351_PFP_PTS	Num Ident byMSMS//byMatch BE352_PFP_PTS
[truncated: 2,216 more rows]
[truncated: 474 more columns]
